# Supplementary material
Source: publisher figshare collection journal article supplement (https://plos.figshare.com/articles/dataset/_/4045491)
Supplement: Supplementary file 1 [file 1]

Archive with 9 entries (9 files):
- S1 Fig.PDF
- S2 Fig.PDF
- S3 Fig.PDF
- S4 Fig.PDF
- S1 Table.XLS
- S2 Table.XLSX
- S3 Table.XLSX
- S4 Table.XLSX
- S5 Table.XLSX
