# Supplementary material
Source: publisher figshare collection journal article supplement (https://plos.figshare.com/articles/dataset/_/4045491)
Supplement: Supplementary file 1 [file 1 › S1 Table.XLS]

## Sheet: Sheet1
S1 Table. The query sequences used in the identifications of CYP93 proteins in each species.
Species	Name	NCBI NO.	Protein sequence
Glycyrrhiza echinata	FNSII	AB001380	MEPQLVAVSVLVSALICYFFFRPYFHRYGKNLPPSPFFRLPIIGHMHMLGPLLHQSFHNLSHRYGPLFSLNFGSVLCVVASTPHFAKQLLQTNELAFNCRIESTAVKKLTYESSLAFAPYGDYWRFIKKLSMNELLGSRSINNFQHLRAQETHQLLRLLSNRARAFEAVNITEELLKLTNNVISIMMVGEAEEARDVVRDVTEIFGEFNVSDFIWLFKKMDLQGFGKRIEDLFQRFDTLVERIISKREQTRKDRRRNGKKGEQGSGDGIRDFLDILLDCTEDENSEIKIQRVHIKALIMDFFTAGTDTTAISTEWALVELVKKPSVLQKVREEIDNVVGKDRLVEESDCPNLPYLQAILKETFRLHPPVPMVTRRCVAECTVENYVIPEDSLLFVNVWS…
Glycine max	IFS1	AF195818	LELALGLFVLALFLHLRPTPSAKSKALRHLPNPPSPKPRLPFIGHLHLLKDKLLHYALIDLSKKHGPLFSLSFGSMPTVVASTPELFKLFLQTHEATSFNTRFQTSAIRRLTYDNSVAMVPFGPYWKFVRKLIMNDLLNATTVNKLRPLRTQQIRKFLRVMAQSAEAQKPLDVTEELLKWTNSTISMMMLGEAEEIRDIAREVLKIFGEYSLTDFIWPLKYLKVGKYEKRIDDILNKFDPVVERVIKKRREIVRRRKNGEVVEGEASGVFLDTLLEFAEDETMEIKITKEQIKGLVVDFFSAGTDSTAVATEWALAELINNPRVLQKAREEVYSVVGKDRLVDEVDTQNLPYIRAIVKETFRMHPPLPVVKRKCTEECEINGYVIPEGALVLFNVWQVG…
Glycine max	IFS2	AF195819	MLLELALGLLVLALFLHLRPTPTAKSKALRHLPNPPSPKPRLPFIGHLHLLKDKLLHYALIDLSKKHGPLFSLYFGSMPTVVASTPELFKLFLQTHEATSFNTRFQTSAIRRLTYDSSVAMVPFGPYWKFVRKLIMNDLPNATTVNKLRPLRTQQTRKFLRVMAQGAEAQKPLDLTEELLKWTNSTISMMMLGEAEEIRDIAREVLKIFGEYSLTDFIWPLKHLKVGKYEKRIDDILNKFDPVVERVIKKRREIVRRRKNGEVVEGEVSGVFLDTLLEFAEDETMEIKITKDHIEGLVVDFFSAGTDSTAVATEWALAELINNPKVLEKAREEVYSVVGKDRLVDEVDTQNLPYIRAIVKETFRMHPPLPVVKRKCTEECEINGYVIPEGALILFNVWQ…
Glycine max	CYP93C1v2	AF135484	KAHTNKGAWTKEEDERLVAYIKAHGEGCWRSLPKAAGLLRCGKSCRLRWINYLRPDLKRGNFTEEEDELIIKLHSLLGNKWSLIAGRLPGRTDNEIKNYWNTHIRRKL
Glycyrrhiza echinata	CYP93C2	AB023636	REELNRGAWTDHEDKILRDYITTHGEGKWSTLPNQAGLKRCGKSCRLRWKNYLRPGIKRGNISSDEEELIIRLHNLLGNRWSLIAGRLPGRTDNEIKNHWNSNLRKRL
Glycine max	CYP93A1	D83968	MAYQVLLICLVSTIVFAYILWRKQSKKNLPPSPKALPIIGHLHLVSPIPHQDFYKLSTRHGPIMQLFLGSVPCVVASTAEAAKEFLKTHEINFSNRPGQNVAVKGLAYDSQDFLFAFAPFGPYWKFMKKLCMSELLSGRMMDQFLPVRQQETKRFISRVFRKGVAGEAVDFGDELMTLSNNIVSRMTLSQKTSENDNQAEEMKKLVSNIAELMGKFNVSDFIWYLKPFDLQGFNRKIKETRDRFDVVVDGIIKQRQEERRKNKETGTAKQFKDMLDVLLDMHEDENAEIKLDKKNIKAFIMDIFVAGTDTSAVSIEWAMAELINNPDVLEKARQEIDAVVGKSRMVEESDIANLPYLQAIVRETLRLHPGGPLVVRESSKSAVVCGYDIPAKTRLFVNV…
Glycine max	CYP93E1	AF135485	MLDIKGYLVLFFLWFISTILIRSIFKKPQRLRLPPGPPISIPLLGHAPYLRSLLHQALYKLSLRYGPLIHVMIGSKHVVVASSAETAKQILKTSEEAFCNRPLMIASESLTYGAADYFFIPYGTYWRFLKKLCMTELLSGKTLEHFVRIRESEVEAFLKRMMEISGNGNYEVVMRKELITHTNNIITRMIMGKKSNAENDEVARLRKVVREVGELLGAFNLGDVIGFMRPLDLQGFGKKNMETHHKVDAMMEKVLREHEEARAKEDADSDRKKDLFDILLNLIEADGADNKLTRESAKAFALDMFIAGTNGPASVLEWSLAELVRNPHVFKKAREEIESVVGKERLVKESDIPNLPYLQAVLKETLRLHPPTPIFAREAMRTCQVEGYDIPENSTILIS…
