# Supplementary material
Source: publisher figshare collection journal article supplement (https://plos.figshare.com/articles/dataset/_/4045491)
Supplement: Supplementary file 1 [file 1 › S2 Table.XLSX]

## Sheet: Table S1
S2 Table. The species used in this study and the conrresponding CYP93 candidate genes identified.
Species	Genome ID	Name	CDS	Intron	Protein
Amborella trichopoda	evm_27.model.AmTr_v1.0_scaffold00022.287	AtrCYP93A79	ATGGAGTTTTTAGGGGGGACACAAGCATACCTTGGATTGTTCATCACATGGCTCATCTCCACTCTAATAGTGAGGTATTTTATCAAATCCCTCATGAAAAAAGATCAGGTTAAGCTTCCTCCTGGTCCTATGGCACTCCCAATTATAGGGCACCTCCATCATTTGGGTCCAATCCCGCACCAAGCCTTCCAGGCGCTAGCAAGGAAGTACGGCCCAGTGATGCAAGTTCGGCTCGGCTCCGTGCTCTCGATCGTGGTATCATCAGCAGACATGGCTCGGGAGTTCCTCAAGACCCACGAGCACGCCTTTGCTTCAAGGCCCCAATCGAAGGCGGTGAAGTGCCTGACATATGGCTCTGCTGACTTCTCCTTTGCACCTTATGGCCCTTACTGGAAATAC…		MEFLGGTQAYLGLFITWLISTLIVRYFIKSLMKKDQVKLPPGPMALPIIGHLHHLGPIPHQAFQALARKYGPVMQVRLGSVLSIVVSSADMAREFLKTHEHAFASRPQSKAVKCLTYGSADFSFAPYGPYWKYMKRICMMELLGGRQLDLFQSIRQQEIKNFLESLFKKSQEGKYVDMNGELTVLTNNIISSMTMSTRCSGTKDKADECRSLVKDVTELTGIFNLADFISFCKNLDLQGLEKRIKEVHKRFDDMVERILKEHEEKKSTGDEPQDLVDILLRISQDEGAEMKLTRENIKAFVLDIFAAGTDTSAITIEWALAELINNHDIFAMARDEIFSVVGRQRVVEESDIPNLPYLQAIVKETLRLHPTGPLIVRESTQDCKVGGYDIPKGAQLFVN…
Amborella trichopoda	evm_27.model.AmTr_v1.0_scaffold00022.290	AtrCYP93A81	ATGTTCATCACATGGCTCATCTCCACTTTAATAGTGAGGTATTTTATCAAATCCCTCATGAAAAAAGATCAGGTTAAGCTTCCTCCTGGTCCTATGGCCCTCCCAATTATAGGGCACCTCCATCATTTGGGCCCAATCCCGCACCAAGCCTTCCACGTTCTAGCAAGGAAGTATGGCCCGGTGATGCAAGTTCGGCTCGGCTCCATGCTCTCGATCGTGGTCTCATCAGCTGACATGGCTCGGGAGTTCCTCAAGACCCACGAACGCGCTTTTACTTCAAGGCCTCAATTAAAGGCGGTCAAGAGCCTGACATATGGCTCTGCTGGCTTCATATTTGCACCTTATGGCCCTTACTTGAAATATATGAAGAGAATTTGCATGATGGAGCTTCTTGGGGGG…		MFITWLISTLIVRYFIKSLMKKDQVKLPPGPMALPIIGHLHHLGPIPHQAFHVLARKYGPVMQVRLGSMLSIVVSSADMAREFLKTHERAFTSRPQLKAVKSLTYGSAGFIFAPYGPYLKYMKRICMMELLGGRQLELFQSIRQQEIKHLLEYLFKKSQEGKDVDMGSELAILTNNIICSMTMSTSCPGAKDKADECRSLLKEGAELVGTFNLADFISFCKNMDLQGLEKRFKKVHERLDDMMERILKEHEEKKSNGGEPQDMVDILLRISKDEGAEMKLTRENIKAFVLDIFGAGTDTSATTMEWALAELVNNPNIFAMARDEIFSVVGRQRVVEESDLPNLPYLQAIVKETLRLYPVGPLILRESTQDCKVGGYDIPKGAHIFVNVWAIGRDPNSWE…
Musa acuminata	GSMUA_Achr8P25390_001	MacCYP93A92	ATGGAAGGAGAGGAGGAGCTCATCAAGCCCATCACCGGTCTCTTCCTCATCCTTGTCCTCTCCTTCCTCCTCTTCTTCGTCAGGCCCCGTAGGCGGCTTCGCCTCCCGCCAAGCCCAATCGGCCTGCCCATAATTGGCCACCTTCATCTCCTTGCACCGATCCCACACCAAGCTCTCCACAAGCTCTCCACTCGCCATGGCCCCTTGATCCACCTCCGACTTGGATCCGTCCGCTGCGTGGTGGCCTCATCCGCCGCGACCGCCAAAGAGCTCCTCAGAACGCATGACTTGTCATTCTCCGACCGCCCTCCTTCCAAGGCCGTGAGCTACCTCACCTATGGCTTATCTGATTTCTCCTTCGCGCCCTATGGCGCGTACTGGAGGTTCATGAAGAAACTG…		MEGEEELIKPITGLFLILVLSFLLFFVRPRRRLRLPPSPIGLPIIGHLHLLAPIPHQALHKLSTRHGPLIHLRLGSVRCVVASSAATAKELLRTHDLSFSDRPPSKAVSYLTYGLSDFSFAPYGAYWRFMKKLCSQERRAIDMGGELIRFTNNVISRMTMSRRCSGSEGESGENLDLQGFDRRLEDDLLDMLIDISEDASAEARLTRDNIKAFILDIFVAGTDTSAITMEWALAELINHPEILHKAREELDAVVGKNRLVEESDIPNLPYLQSIVKETLRLHPTGPLILRRSNNDSKIDGYDVPANTTVFVNVWAIGRDPERWSDPLEFYPERFMEKKGEEAMDVRGQHFELIPFGSGRRGCPGASLALQLVQSTVGAMIQCFEWKVGGGSGVGTALPT…
Phalaenopsis equestris v5.0	pe__PEQU_35246	PeqCYP93A93	ATGCCCTGCATCATTGCTTGCTCCGCTTCAGCTGCTCGCGAGTTTCTTAAGACGCATGACTCATCCTTTCACAACAGACCCTTCACCAAGGCGGTCTCTATTCTAACATACGGCTCCTCAAACTTCTCCTTCGCTCCTTACGGCAGCTTTTGGCGCTTCACGAAGCGACTCTATATGTTGGAGCTCTTCAGCGCTCGAACACTTGAGCAATTTCGTCCAATTCGTAGTGATGAGCTTAGACAACTTCTTGAGGAGTTGCACATCAAAGCCAAGAAAGGTGAGTCTGTGGACTTAGGCGCAGAGATGACGAGGATGACAAACAATGTGACTAGCCGCATGGCCGTTAGCCGACGATGCTCGGGAACAAATGCTGAGGCTGAGGAGGCAACTCGGTTGGTG…		MPCIIACSASAAREFLKTHDSSFHNRPFTKAVSILTYGSSNFSFAPYGSFWRFTKRLYMLELFSARTLEQFRPIRSDELRQLLEELHIKAKKGESVDLGAEMTRMTNNVTSRMAVSRRCSGTNAEAEEATRLVMETTELLGKFNVADYLWFCRNLDLQGFDKRLLDLHQRFDRLMERIMEEKEEERKKRKGACLKDEDNFRDKDLLDILIDISEDEAAEVKLTRNNVKAFIRDIFTGGTDNTSLTVQWAMAELINNPIYMEKARAELDAIVGNHRLVDENDIPNLPYLKAIVMETLRLHPPTPLIPRESDKECIVGGFNIPSKTRLFINVWAIGREAKHWPNPLKFMPDRFLVKDDDGDIGINFRGQHFHLIPFGSGRRGCPGITAALQVVYSALASLI…
Phalaenopsis equestris v5.0	pe__PEQU_35265	PeqCYP93A94	ATGTATAGCAGCATCGTGGGTGAAGCCACTCATGCAGCACTTCTACCCTTCGTTGCTCTCTTAATGCTCATTGTTTTTCTCCCTTTGTTTCGGCACTTCCACCAAGACCCTTGTCATCATGTTCATCCTCGCCTACCATCACCTCATCGCTTACCTATCATAGGTCACCTCCACCTCCTCTCAGCCCTTCCACATCAATCCTTCCACCGCCTATCCCAGCACCTAGGACCCATTTTCTCCCTTAGCCTCGGCTCCATACCATGCATCATCGCTTGCTCCTCTTCGGCTGCTCGCGAGTTTCTTAAGACACATGACTCTTCCTTTCCCAATAGACCATTCACTAAGGCTGTCTCCATTCTAACATATGGTTCTTCTAACTTCTCATTTGCTCCTTACGGC…		MYSSIVGEATHAALLPFVALLMLIVFLPLFRHFHQDPCHHVHPRLPSPHRLPIIGHLHLLSALPHQSFHRLSQHLGPIFSLSLGSIPCIIACSSSAAREFLKTHDSSFPNRPFTKAVSILTYGSSNFSFAPYGSFWRFTKRLYMMELFSTRTLEQFRPIRRDELRRLLVELHAKAKEGEFVDLGAEMTKMTNNVTTRMAVSRRCSGTNAEADEATRLVMQTTELLGKFNVADYLWFCKNLDLQGFDKRLQNLHQRFDGLMERIMEEKQEERKKMKELHQNDEDNLKAKDLLDILMDISEDEGAEVKLTRNNVKAFIRDIFTGGTDNTSLTVQWAMAELINNPIYMQKARAELDTIVGNHRLVDENDIPNLPYLKAIVMETLRLHPPTPLIPRESDKDCM…
Aquilegia coerulea v1.1	Aquca_009_00210.1	AcoCYP93A95	ATGTGTGGCATTCTTTTGCTCATCTCTGCCACTATAGCCATCATCTGGAGGTCTCAAGGCGGTAATCGTCTCCCACCCAGCCCATTAGCCCTACCAATCATTGGACATCTTCACCTCCTTAGCCCAATCCCTCACCAAGCTTTTCACAAGTTGTCTACTAAATATGGTCCCTTAATATACCTCCTCTTAGGTTCTGTACCATGTGTTTTGGCTTCCACAGCTGAAACAGCCAAAGAGTTTCTTAAAACTCATGAGCTTTCCTTCTCAGATCGTCCATTTTCAGCTGCTGTTGATTACTTAACATATGGTTCTGCTGACTTCTCTTTTGCTCCATATGGACCTTACTGGAAATTCATGAAGAAGATTTGTATGTCTGAGCTTTTAGGTGGCCGGACGCTT…	Multi-intron	MCGILLLISATIAIIWRSQGGNRLPPSPLALPIIGHLHLLSPIPHQAFHKLSTKYGPLIYLLLGSVPCVLASTAETAKEFLKTHELSFSDRPFSAAVDYLTYGSADFSFAPYGPYWKFMKKICMSELLGGRTLDQLLPVRREEIRRLLMKMIRKSDSEDTVDVGGELITLANNIISRMMMNKRCSESEKEAEDVRSLVHEVAELTGTFNLSDYIWFCRNIDLQGLRKRFEDLHVRFDAMAEKIMKEHEEVRGEKNERGNEGDRVKDLLDILLDVAEDDKAELKLTRENIKAFILDIFAAGTDTTAITIEWALAELINQPDIFDKAREEIDSVVGKSRLVEESDIQNLPYLQAIVKETLRLHPTAPLIVRESTEDCKIGEYNIPKKTRLFVNVWAIGRDP…
Aquilegia coerulea v1.1	Aquca_028_00099.1	AcoCYP93A96	ATTATCATCTGGACGTCTAGAAGGGGTGCTCGCCTTCCACCGAGCCCATTAGCCCTACCAATTATTGGACATCTTCACCTCATTGCACCAATCCCTCACCAACAACTTCACAAGCTATCCAACAAATATGGTCCCTTAATTCATGTCCTCATAGGTTCTATACCTTGTGTTGTAGCCGGTACAGCTGAAACAGCGAAAAAAGAGTTCCTCAAAAATCATGAACTTACCTTTTCAGACCGTCCTTTCATAGCTGCTAGCGATTACATAACATATGGTTCGGCAGTTCTCACATTTGCTAGTTATGGACCATTATACAGATTCAGGAGAAAGATTTGCACGTCCGAGCTCTTAAATGGTCGCACACTTGACCAGTTATACTCTGTCAGACATGAGGAAATA…	Multi-intron	IIIWTSRRGARLPPSPLALPIIGHLHLIAPIPHQQLHKLSNKYGPLIHVLIGSIPCVVAGTAETAKKEFLKNHELTFSDRPFIAASDYITYGSAVLTFASYGPLYRFRRKICTSELLNGRTLDQLYSVRHEEIRRFLRMMLHKSDTEVTVNVSSELLKLMTNLISRMMMSKSWSSESEIETEEIIILLHEVEELSAMLDLSDCIWFCRHLDLQGVMKRSKNVHLKLDAFLEKIIKEQEEIRTKRNDKIEGGHVKHLLDILLDVAENNSAEFKLTRENIKAVILDLFLASTDTSSKTMEWAFAELINHPHIFQKAREEIDSVVGKNRLVEESDIPNLPYLQAIVKETLRLHPPGPLLARRASEDCKVGEYDIPKNTTLLVNVWAIGRDAKHWENPLEFCP…
Aquilegia coerulea v1.1	Aquca_028_00106.1	AcoCYP93A97	ATGGTTGGTTCTGACTTCCTAAACTTTACTGTATATGGCATTATTTTTGCCATCTCGGCTGTAGCAGTTATCATCTGGAGGTCTAGAAGACGTGTTCGCCTCCCACCGAGCCCATTAGCACTACCTATCATTGGACATCTTCATCTCCTTGGACCAATCCTTCATCAAAACTTTTACAAGCTTTCCAACCAATATGGTCCCTTAATTTATCTCCTCCTAGGTTCTGTACCTTGTGTTATAGCCTCCACAGCTGAAACAGCAAAAGAGTTCCTCAAAACTCATGAACTTGCTTTCTCAGGCCGTCCTTTCTTAGATGCTGTCGATTACATAACATACGGTACTGCAGACTTCACTTTTGCTCAATATGGACCCTACTGGAGATTCATGAGAAAGCTATGT…	Multi-intron	MVGSDFLNFTVYGIIFAISAVAVIIWRSRRRVRLPPSPLALPIIGHLHLLGPILHQNFYKLSNQYGPLIYLLLGSVPCVIASTAETAKEFLKTHELAFSGRPFLDAVDYITYGTADFTFAQYGPYWRFMRKLCTSELLNGRTLDQLYYVRREEIRRFLAVMLQKSDAEETVSVSGELLTLMNNIISRMMMSKRSSESENETAEIRILVNEVAEISGTLNLSDCIWFCRYFDLQGIKKRTEDVHVRLDAIIEKIIKDQRELRNQNSEGGRVKHLLDILLDVAEDDNAEFQLTCENIKSFILDVFVAGSDTSAKTTEWALAELINHPDIFEKAREEIDSVIGKNRLVEESDIQNLPYLQAIVKETLRLHSTGPLLVRRASEDCKVGEYDIPKNTRLFVNVW…
Aquilegia coerulea v1.1	Aquca_028_00232.1	AcoCYP93A98	ATGATCATGGAATCTGATCTCCTAAACTTCACACTGTGTAGCATTATTGTGATCATCACGACCTCAGTAGCGATACTCATGAGCTCTAGAGGTACTGGTCGCCTCCCACCGAGTCCTGTAAAATTACCTATCATTGGACATCTTCACCTTCTTGGACCAATCCCTCACCAAGCTTTTTACAAACTGTCCAACAAATATGGTCCCTTAATTTACCTCCTCTTAGGGTCTGTACCTTGTGTCGTAGCTTCCACAGCTGAAACTGCGAAAGAATTTCTTAAGACTCATGAACTTTCCTTTTCCGGGCGTCCTTTTCTTACTGCTGTTGATAAATTAACATATGGTTCTGCTGACTTCACTTTTGCTCAATATGGACCTTATTGGAGATTCATGAAGAAGCTG…	Multi-intron	MIMESDLLNFTLCSIIVIITTSVAILMSSRGTGRLPPSPVKLPIIGHLHLLGPIPHQAFYKLSNKYGPLIYLLLGSVPCVVASTAETAKEFLKTHELSFSGRPFLTAVDKLTYGSADFTFAQYGPYWRFMKKLCMSELLGGRTIDKLLPVRREEIKRFLKLILQRSDSEETVNVSAELTTLMNNIISRMMLSKRCSESENDAEEVKTLVQEVAELGGKFNLSDFIWFLRNIDLQGCKKRSEDVHVRYDAMIEKIIKEHEEVKSKQKESSEDGVKDLLHILLDAAEDDKAEIKLTRENIKAFILDLFVAGTDTSASTTEWALSELINHPDIFENAREEIDNVVGKNRLVEESDIQNLPYLQAIMKETLRLHPTGPLVVRKSSEDCRVGEYDIPKNTRLFV…
Nelumbo nucifera v1.0	nn__NNU_007936RA	NnuCYP93A45/44	ATGAAAAAGATATGCATGTCAGAGCTCTTAGGTGGTCAGACTCTGGACCAGTTATTGCCTGTCAGAATAGAAGAAATAAAATGGCTGTTGAGGTCGATTTTAAACAAGTCGGAAGCTGGTGAGGCCGTCGGTGTTAGAGCAGAACTGATAAGGATGACCAACAACGCGGAGGAGGTCAAAGCAGTGGTTGAGGAAGCGTTGGAGATCGCCGGTACGTTTAACTTATCGGATTATATAGGGTTTTGTAGGAACTTTGATTTACAGGGTTTGAGAAAGAGGTTTAAAGACATACACGAGCGGTTGGATAGGATGATGGAGATGATACTAAGGGAGCATGAGCAGGTGAGGGGGGAGAAGGGGATGGGAGATGAAGCGAAGGATCTGCTCCATATATTACTC…		MKKICMSELLGGQTLDQLLPVRIEEIKWLLRSILNKSEAGEAVGVRAELIRMTNNAEEVKAVVEEALEIAGTFNLSDYIGFCRNFDLQGLRKRFKDIHERLDRMMEMILREHEQVRGEKGMGDEAKDLLHILLDVAEAENSEMKLSRENIKAFILDIFVAGTYTSAISMEWALAELINHPSVFEKAREEVDVVIGKSRSVEEPDIPNLPYLQAIVKETLRRHPVEPLIPRESTKDCIPAETTAYVNIWAIGRDPKHWDNPLEFQPERFIAQEGSSTGAQLDVRGQHFHFLPFGSGRRSCPGASLALQLMETTLASLIQCFEWKVGLISIVVVTLTSILYKRRRKLRLPPGPLALPIIGHMHLIGSIPHQSFHKISNRYGPLIHLLLGSVPCVVVSSAEA…
Nelumbo nucifera v1.0	nn__NNU_007937RA	NnuCYP93A46	ATGGCTGTCATTGATGGCTATGCCATGGAATTCCTTGTATACCTCATCACCACACTAGTGCTTACATCCATATCCATCTACTTGTTCAGGACAAGAAACAAACACAAAGTTCGTCTTCCACCAGGCCCATTAGCTTTACCTATCATCGGACACCTACATCTCATGAGTTCAATCCCTCACCAAAGTTTCCAAAAGCTCTCCAACCGCTATGGTCCTTTGATTCATATTCTCCTCGGCTCCGTCCCTTGTATAATAGTCTCCTCCCCTGAGGTAGCAAAAGAAGTGCTCAAATCCCAGGAGCTTGACTTCACTTCTCGACCCATGTCTCTTGCTGTAAACTACTTGACGTATGACAGTGCCGACTTCATCTTTGCTCCATATGGACCCTACTGGAGATTC…		MAVIDGYAMEFLVYLITTLVLTSISIYLFRTRNKHKVRLPPGPLALPIIGHLHLMSSIPHQSFQKLSNRYGPLIHILLGSVPCIIVSSPEVAKEVLKSQELDFTSRPMSLAVNYLTYDSADFIFAPYGPYWRFMKKLCMTELLNGQILNQFVPMRKEELRRFLKSIFNMSLLGKAINVRQQVMRLTNNTITRMMMNTRCSETEDQAEQVIMVAQEATELAGTFNLSDYIGICRHLDLQGFGRRMKDTRRRFDNIIDKIIMEHEEARSQKKKMGSTSDGGNNHGVKTLLDLLLDICEDEEAEVRLTKSNVKAFLLDLFLAGTDTSAVTIEWAMSELINNPSVLEKAREEMDLVVGKSRLVEESDIPNLPYLQAIVKETLRLHPGAPLVLRASTRDCKLLG…
Nelumbo nucifera v1.0	nn__NNU_013039RA	NnuCYP93A49	ATGATGGAGATGGACCTTCAGTCCCTGGCCACTCTCTTCCTTGTCGGGCTCATCTCCACCATCCTGGTTCGAACAGTTCTCAGCAGGACTAGTCGGCCTCGCCTTCGCCTCCCTCCCAGCCCCATGGCCTTGCCCGTCTTCGGACATCTTCACCTCCTTGGCCCCTCCCCTCACCAGGCCTTCCACAAGCTGGCCGCCCGCTATGGACCCTTGTTCTACCTCCGCCTAGGCTCCGTCCCTCATGTTGTCGTCTCCTCCCCTGAAATCGCCAAAGATTTCCTCCGCACCCATGAGTTGGCCTTTTCCGCCCGCCCTCAGTCCGAAGCCGCACGACAGATTAGCTACAACTTTGCCGACTTCTCCTTCATCCCCTACGGCCCTTACTGGAAGTTCATGAAG…		MMEMDLQSLATLFLVGLISTILVRTVLSRTSRPRLRLPPSPMALPVFGHLHLLGPSPHQAFHKLAARYGPLFYLRLGSVPHVVVSSPEIAKDFLRTHELAFSARPQSEAARQISYNFADFSFIPYGPYWKFMKKLIMSELFGSRMLDKFLAIRHDETQSFIKFLVNKSEARQEVHLSGELIRLTNNVISRMAISRRCSGNDDEAEEVKNLIMEIADLLAAFNIGEFVPLLKSFGSKGFDERVKDVHRRFDVIMEKVITEHEEARRKKEEIKGDGVKDILDMLLDIAEDENSEIRLTRENIKAFLLDIIAAGTDTTALTIEWALAELINHPPLFKKLREELDSVVGKRKLVEENDIPNLPYLQAVVKETLRLHAPAPLIVRQSVRHCNIRGYDIPANARM…
Mimulus guttatus v2.0	Migut.J01804.1	MguCYP93A99	ATGGCTGAATACAAAGAATATATCATCTTCTTCCTCATATGGCTAGTTCCCACTATTATAATCCGAACCCTAATCAAGAAACGATCTTCTAGAACCCTTCCTCCGAGCCCTCCATCGTTGCCAATCATCGGTCATCTTCATCTTCTAGCTCCAATACCTCACCAAGCCCTAGCAAAGCTCTCGTATAAATACGGGCCCTTGATCCACATACACCTCGGTTCTTACCCTTGCTTAATCGCTTCATCGCCCGAGATAGCGAAAGAGTTCCTCAAAACACACGAAAGATCTTTTTCAGACAGGCCTCAAACTGTTACTACAGACTACTTAACTTACGGTTCACAAGATTTCTCGTTCGCACCTTACGGGCCTTTTTGGAAGTTCATGAAGAAGCTCTGCATG…	One intron	MAEYKEYIIFFLIWLVPTIIIRTLIKKRSSRTLPPSPPSLPIIGHLHLLAPIPHQALAKLSYKYGPLIHIHLGSYPCLIASSPEIAKEFLKTHERSFSDRPQTVTTDYLTYGSQDFSFAPYGPFWKFMKKLCMSRLLGGPTLDLLQPVRAHEIKRLVRFLAKKARNGESVDIGNELVKMTNNVISSMIMSQRCSGDEEGEAEGVRKLVQDIAEITGTFNVSDYIWFCKNLDLQGIGKRMKEVRDRFDEMMERIINEHRVRRRESSKESVKDLLDILLDIAEDGSSEMKLTRENIKAFILDLFIAGTDTSAITLQWALSELINHPEIMQKAAHEIDSLIGNNERLVQESDIPNLPYLQAIVKETLRLHPTGPLIVRQSSEDCTVGAYHIPAKTRLFVNVW…
Mimulus guttatus v2.0	Migut.J01805.1	MguCYP93A100	ATGGTGGTTGCCTTCCATTGTTTCTTATTTGTGCTACTTTCTCTCTCTAAAACTGCATTGTCAGAAAGATGCCACCCAAATGACAAAAAAGCCCTCCTGAAAATCAAGAAAGACCTCAACTACCCCCACCACTTCATCTCGTGGGACGCAAAAACCGACTGCTGCATCGACTGGAAAGCGGTGGGGTGCGACGATAAAACCCACCGCATCACCCAATTCTACGCCGCATACGCCGATCTCAACCTCCCCATCCCGGCGGCGATCGGAGACCTCCCGTTTCTCGAGTACCTCAAGTTTCACAAATCCGGGGTCACCGGAGAAATCCCGGAATCCATAACAAAGCTTTCTCACCTTCAGTTTCTCGATCTCCGGTGGAATTATCTTACAGGCCCTGTTCCT…	Multi-intron	MVVAFHCFLFVLLSLSKTALSERCHPNDKKALLKIKKDLNYPHHFISWDAKTDCCIDWKAVGCDDKTHRITQFYAAYADLNLPIPAAIGDLPFLEYLKFHKSGVTGEIPESITKLSHLQFLDLRWNYLTGPVPSFLGKLKKLTYIALSFNNLTGSIPASLSEIQNLGRLRLDRNKLTGGIPESFADFRQQDFSLYLSHNQLTGNIPAKLGYANFTWIDVSRNRLQGDVSFLFGKNKSLGVADFSRNMLEFDLSEVEFPASLTDLDLNHNRITGSLPEGLAELGSTLNSLNKSETMAEYIIFFLIWLISTIIIRTLIKQRSSTSRSLPPTPRGLPIIGHLHLLSPIPHQALAKLSSKHGPLIHIRLGSYPCLIVSSPEISKEILKTHESSCSNRPQNAAI…
Solanum lycopersicum iTAG2.3	Solyc01g010260.2.1	SlyCYP93A42	ATGGTGGATATTCAAGGCTACTTGATATTATTCCTTATTTGGCTATTTTCTACCTTATTTCTTAAATATGTTGTGTTTCGTAAACGGAACACATGTCACCTTCCACCAAGCCCATTTGGTTTACCGATCATCGGTCACTTACACCTCCTATCTCCTATTCCTCACCAAGCACTTCACAAGCTCTCGACTCGTTATGGGCCTTTAATTCATATAAATCTTGGATCCGTCCCTTGTCTAGTAGTTTCATCACCCGAAATGGCTAGACAAGTACTCAAAACACACGAAACTTCCTTTCTAAATCGACCACAAACATCAGTGATTGATTACTTAACTTATGGTTCACAAGACTTCTCATTTGCACCTTACGGTGTTTACTGGAAGTTCATGAAGAAAATATGC…	One intron	MVDIQGYLILFLIWLFSTLFLKYVVFRKRNTCHLPPSPFGLPIIGHLHLLSPIPHQALHKLSTRYGPLIHINLGSVPCLVVSSPEMARQVLKTHETSFLNRPQTSVIDYLTYGSQDFSFAPYGVYWKFMKKICMSELLGARTLDMLLPVRRDEIKRFIELLLHKAESSEEVDVEAELLRVSNNVISRMLMNERCSEDKDEAGSVRMLVQDITELTGKFNLSDYIWFCKNLDLQGFGKRTKDVRKRFDEIMERIINEHEEARSKRNSESIVIKDLLDILLDISEDDCAEMKLTRENIKAFILDIFAAGTDTAAITVEWALAELINHPNIMQKAVEEIDGLIGKNQIVEESDIVNLPYLQAIIKETLRLHPTGPMILRESTEDCCVGGYHIPKNTRLIVNT…
Actinidia chinensis	Achn126471	AchCYP93A101	ATGGGTGAGTTTCAAGGTTACATCCTATTCGGTCTCGTTTGGATTGCTTCCATCACTTTTCTCCGAGCCCTCCTCAAAAGTCGAACCAGACTTCACCTCCCTCCGAGCCCACTAGCCCTGCCAATCATCGGTCACCTCCACCTCCTTGCCCCGATCCCCCACCAAGCCCTTCACAAGCTCTCAAACCGCCTCGGACCCCTAATCCACATCTCCCTCGGCTCTGTCCCTTGCATCGTTGCTTCCTCTCCTGAAGCCGCTAAAGAGGTCCTCAAAACCCATGAAGTGTACTTTTCCAACCGCCCCCTAATGGCTGCGGTTGATTACCTAACTTACGGTTCCCAAGACTTCTCCTTCGCGCCTTATGGACCTTATTGGAAGTTCATGAAGAAATTGTGCATG…		MGEFQGYILFGLVWIASITFLRALLKSRTRLHLPPSPLALPIIGHLHLLAPIPHQALHKLSNRLGPLIHISLGSVPCIVASSPEAAKEVLKTHEVYFSNRPLMAAVDYLTYGSQDFSFAPYGPYWKFMKKLCMSELLGGRTLDLLLPVRHDEMKRFVELLLRKAKAGEAVDVGGELIRVTNNTISRMIMSERCSENEDEAGEVRKLIQETAELTGKFNLSDFIWFCKNLDLQGFRKRLKGVRDRFDAMMERIISEHEDSRRKMKRESCDGGERVKDLLHILMDIAEDETSDMKLSKENIKAFILDIFAAGSDTSAITTEWALAELINHPNIMEKAIKEIDTVVGSSRLVQESDIQNLPYLQAIVKETLRLHPTGPLIVRESTEDCTVMGYHVPAKTRLF…
Capsicum annuum v1.55	CA01g14400	CanCYP93A42	ATGGTGGATCTTCAAGGCTACTTGATGCTATTCCTTATTTGGCTATTTTCTAGCTTATTTCTTAAATATGTGGTGTTTCGTAAACGAACCACGTGTCATCTCCCACCAAGCCCATTTGGTTTACCGATCATCGGTCACTTACACCTCCTATCTCCAATTCCTCACCAGGCACTTCACAGGCTCTCGAACCGCTATGGGCCTTTGATCCACATAAATCTTGGATCTGTCCCTTGTCTAGTAGTTTCATCACCCGAAATGGCCAAACAAGTACTCAAAACTCATGAAACTTCATTTCTAAATCGACCTCAAACAGCAGTGGTTGATTACTTAACTTACGGTTCACAAGACTTTTCCTTTGCACCTTACGGTCTTTACTGGAAGTTCATGAAGAAAATATGC…		MVDLQGYLMLFLIWLFSSLFLKYVVFRKRTTCHLPPSPFGLPIIGHLHLLSPIPHQALHRLSNRYGPLIHINLGSVPCLVVSSPEMAKQVLKTHETSFLNRPQTAVVDYLTYGSQDFSFAPYGLYWKFMKKICMSELLGARTLDMLLPVRRDEIKCFIELLLQKAESGEAVDIEAELLRVSNNVISRMIMSERCSEDKHEAGSIRKLVQEIAELAGKFNLSDYIWFCKNLDLLGFGKRTKDVRKRFDKMMERIINEHEEARRKRNRQSKDEGETVAIRDLLDILLDISEDECSEMRLTRENIKAFILDIFAAGTDTAAITVEWALAELINHPNIMQKAVHEIDLVIGKNRIVEESDILNLPYLQAIVKETLRLHPTGPMILRESTEDCCIEGYHIPKNT…
Vitis vinifera Genoscope.12X	GSVIVT01033365001	VviCYP93A9	ATGAAAAAACTTTCTATGACCAAACTTCTAGGTGTCCAAACACTAGATAAATTTGTCCCAGTTATGAGAGAAGAGAGACATCTATTTTTGCAGACACTACTGGGAAAAGCTGAAGCAGGTGAGGCGGTTGATGTAAAGAAAGAGATTATGAGGCTAACAAACAACTTAATAACAAAAATGATCATGAGACACAGATGTTCTGACAGCGAAGATGATGCTACTGAAGTGAAGGAGTTGATGACAGAGATGATGAAGCTCATAGGCAGTTTTAACTTGTCGGATTTTGTCTGGTTTTGTAAGAATTTAGACCTACAGGGGTTTAAGAAGAGGGTCAAAGAAGCTCGTGCAAGGTTTGATGCAATAATGGAAAGGGTCATGAAGGCTCGTGAAGAAGAAAGG…		MKKLSMTKLLGVQTLDKFVPVMREERHLFLQTLLGKAEAGEAVDVKKEIMRLTNNLITKMIMRHRCSDSEDDATEVKELMTEMMKLIGSFNLSDFVWFCKNLDLQGFKKRVKEARARFDAIMERVMKAREEERRKKRDMNDAGVAMNDFLDILLDIMENEKEEMRLTRENVKGIILDIFGGGTETSGTAAIWAVAELINHPNIMEKARQEIDSVVGKDRLVEESDIANLPYLQAIVKEILRLHPPGALIARESTEDCTIGGYHIPAKTQLFVNRWAIGRDPNYWENPLQFLPERFLTEDGSLKSHLDVRGQHFHLLPFGSGRRICPGVSLALQVIQTSLAAMIQCFEWRVGDGGNGNVDMEEGPNAVLVHPLICVPVARVNPFPKYTM*
Vitis vinifera Genoscope.12X	GSVIVT01033367001	VviCYP93A17	ATGAAGAAACTGTGTATGACCGAACTACTTGGCATGCAGACGATACACCACTTTGGTCCCATTAGGCGCGAGGAGAGGAACCGACTCTTACAGAGACTACTAAAAAAGGCCAAAGCTGGTGAGGCGGTTGATGTTAAAGCTGAGCTTTTGAGGCTAACCGGTGACATAGTGTCAAGAATGAGTATGAGCCGAAGATGCTCAGACAATGAAGATGAGGCTGCCGGGGTGAAGAAGTCGATACTAGAAATGGCCAGTATGGCAATGAAGCTTAATGTGACAGATTTTATCTGGTTCTGTAAGAAATTAGATATTCAGGGTTTCTTAAAGAAGGCAAAGGCAGCTCGTGATAAATACGACTCCATGATCGAGAGGATTATAAGCGAGCATGAAGAGGCGAGG…	One intron	MKKLCMTELLGMQTIHHFGPIRREERNRLLQRLLKKAKAGEAVDVKAELLRLTGDIVSRMSMSRRCSDNEDEAAGVKKSILEMASMAMKLNVTDFIWFCKKLDIQGFLKKAKAARDKYDSMIERIISEHEEARRKKEAGDGNGEVKDLIDMLLDTTEDEKAEMRLTRENIKALMLNMIGGGTTSPAHAMEWALAELINRPNLMEKARHEIDSVVGKDRLVEESDITNLPYVEAIVRETLRLHPPGHFIVRESIEDCKVGGYDIPAKTQLIVNVWAIGRDPNSWENPLEFQPERFLNEGGINRRLNVRGQQFHLLPFGSGRRLCPGTTLALQVLHTTIAALIQCFDWKVNGNIDMKEGFGSTRATPLVCVPVVRLNPLPIYTS*
Vitis vinifera Genoscope.12X	GSVIVT01033368001	VviCYP93A16	ATGCATATTCTAACACCATCAGCTCCTCTAGGAAGATGTTGGTTTTGGAGGAAACAAATAAAAAAGGACAAAAGTAGAATAATGCAGAGTATAATGTTCCAAAAAAAAAACAAAAATGAGACTGTAACTGTACAGGTCCATGGATTGACCCTGCCAATCATTGGTCACCTCCATCTCCTTGCTCCTATACCTCACCAAGCTTTTCACAAGCTCTCACACCGCTATGGACCATTAATTCATCTCTTCCTCGGATCTGTCCCCTGTGTTGTTGCTTCCTCCCCAGAAATGGCCAAAGAGTTCCTCAAAACTCATGAAACTTCATTCTCTAATCGACCCAAAATTGCTGCTGTTGATTTCTTGACATATGGCTCAGCTGACTTTTCCTTTGCTCCCTATGGG…	multi-intron	MHILTPSAPLGRCWFWRKQIKKDKSRIMQSIMFQKKNKNETVTVQVHGLTLPIIGHLHLLAPIPHQAFHKLSHRYGPLIHLFLGSVPCVVASSPEMAKEFLKTHETSFSNRPKIAAVDFLTYGSADFSFAPYGLYWKFMKKLCMSELLSAGEEIDVREELIRVTNNVISTMTMSLRCSDSENEAGEVKRLVQEVAELTGKFNLSDFIWFCKNLDLQGFGKRLKEVHERFDSMIEKIMREHEEARKKEMGGGGDAAKDVLDILLDISEDQSSEIKLTRENIKAFILDIFAAGTDTSAITTEWALAELINNPNIMEKARQEIDSVVGKNKLVEESDIANLPYLQAIVKETLRLHPTGPLIVRESSEDCTIGGYDIPAGTRLFVNVWAIGRDPNHWENPLEF…
Prunus mume v1.0	Pm025816	PmuCYP93A126	ATGATTATGGCTAGTTTCCTTGAATACCTTGTATTTTTCCTCGTATGGTTAGTCTCTTTCATCTTGTTCCGAACCATCTTCACCAAGCCTAGAAGTCTCCCTCCAAGTCCACGAGCCCTACCAATCATTGGCCACCTCCACCTCCTTGGCCGCATCCCTCACCAAGGCCTGCACAAGCTTTCGAACCGCTATGGACCTTTAATTCATCTCTTTCTTGGTTCCATACCATGTGTCGTTGCCTCCTCACCAGAAATGGCCAAAGAATTCCTCAAAACCAATGAAACGTACTTCTTGAACCGCCCCAAGATGGCGAATGTAGACTACCTCACTTATGGCTCAACGGACTTTGCCATGGCACCCTATGGACCTTACTGGAAGTTCATGAAGAAGCTTTGCATG…		MIMASFLEYLVFFLVWLVSFILFRTIFTKPRSLPPSPRALPIIGHLHLLGRIPHQGLHKLSNRYGPLIHLFLGSIPCVVASSPEMAKEFLKTNETYFLNRPKMANVDYLTYGSTDFAMAPYGPYWKFMKKLCMTELLGGRILEQNLPIRDDEIKRFLHVVLNKADKGEELDVGSELVRLSNNIISRMALKRRCSEQEEEAHMVRELVGKMNELAGKFNFTDMFWFCKNFDLQGYGKRLKEVRDRYDDMMEKIIKEHEDERRKRIKEKEGDDGLDLLDILLDIYEDQGSEIKLSRENIKSFIMNMFGAGTDTSSSTMSWAIAELINHPNVVEKAREEIDSVVGKSRLVGESDTANLPYLQAIVKETLRLHPAGPMVVRESTEECTVNGYTIPAKTRLFVN…
Prunus mume v1.0	Pm026002	PmuCYP93A91	ATGATTATGGCTAGTTTCCTTGAATACCTTGTATTTTTCCTCGTATGGTTAGTCTCTTTCATCTTGTTCCGAACCATCTTCACCAAGCCTAGAAGTCTCCCTCCAAGTCCACGAGCCCTACCAATCATTGGCCACCTCCACCTCCTTGGCCGCATCCCTCACCAAGGCCTGCACAAGCTTTCGAACCGCTATGGACCTTTAATTCATCTCTTTCTTGGTTCCATACCATGTGTCGTTGCCTCCTCACCAGAAATGGCCAAAGAATTCCTCAAAACCAATGAAACGTACTTCTTGAACCGCCCCAAGATGGCGAATGTAGACTACCTCACTTATGGCTCAACGGACTTTGCCATGGCACCCTATGGACCTTACTGGAAGTTCATGAAGAAGCTTTGCATG…		MIMASFLEYLVFFLVWLVSFILFRTIFTKPRSLPPSPRALPIIGHLHLLGRIPHQGLHKLSNRYGPLIHLFLGSIPCVVASSPEMAKEFLKTNETYFLNRPKMANVDYLTYGSTDFAMAPYGPYWKFMKKLCMTELLGGRILEQNLPIRDDEIKRFLHVVLNKADKGEELDVGSELVRLSNNIISRMALKRRCSEQEEEAHMVRELVGKMNELAGKFNFTDMFWFCKNFDLQGYGKRLKEVRDRYDDMMEKIIKEHEDERRKRIKEKEGDDGLDLLDILLDIYEDQGSEIKLSRENIKSFIMNMFGAGTDTSSSTMSWAIAELINHPNVVEKAREEIDSVVGKSRLVGESDTANLPYLQAIVKETLRLHPAGPMVVRESTEECTVNGYTIPAKTRLFVN…
Prunus mume v1.0	Pm026003	PmuCYP93A90	ATGGAAGTAGATCTCCAAGGCTATATCATACTTTTCCTTGTGTGGCTAGTCTCCACAATTCTTGTTCGAATCATACTCACCAAAATTCGAACCAAGCCTCGCCTTCCACCAAGTCCGATGGCCTTACCAATCATTGGACACCTCCACCTCCTTGCTCCGATACCTCACCAAGCTCTTCACAAGCTGTCTAACCGCTATGGATCTTTGATTCACATCTTTCTTGGTTCTGTCCCTTGTGTAGTCGCTTCCTCACCCGATATGGCGAAAGAGTTCCTCAAGACTCATGAAGGGTCTTTTTCCAACAGGCCTTATATTGCTGCTGTTGATTATCTCACATATGGATCAGCTGATTTTTCATTTGCTCCTTATGGACCTTACTGGAAATTCATGAAGAAACTT…		MEVDLQGYIILFLVWLVSTILVRIILTKIRTKPRLPPSPMALPIIGHLHLLAPIPHQALHKLSNRYGSLIHIFLGSVPCVVASSPDMAKEFLKTHEGSFSNRPYIAAVDYLTYGSADFSFAPYGPYWKFMKKLCMSELLGGRTLDQLLPVRREELTSFIQLILKKAKAAEAVDVGAELMTVTNNVISRMTMGQSCSANETEANEIRKLVKATAELSGKFNLSDFIWFCKNLDLQGFGKRLKEARDRFDTMMERIIKEHQEARKKKELGEGGEAVKGFLDILLDISEDETSEFRLSMVNIKAFIMDIFTAGTDTSAITTEWALAELINHPEVMKKARQEIDSIVGKNRLVEESDIANLRYLQAIVKETLRLHPTGPLIMRESTEACSIGGYEIPAKTRLF…
Prunus mume v1.0	Pm026004	PmuCYP93A102	ATGGAAGTACATTTCCAAGGCTATATCATACTTTTCCTTGTGTTGCTAGTCTCCACAATTCTTGTTCAAATCGTACTCAACAAAATTCGAACCAAGCCTCGCCTTCCACCAAGTCCAATGGCCTTACCAATTATTGGACACCTCCACCTTCTTGCTCCGATACCTCACCAAGCTCTTCACAAGCTGTCTAACCGCTACGGATCTTTGATTCACATCTTTCTTGGTTCTGTCCCTTGTGTAGTCGCTTCCTCACCTGACATGGCAAAAGAGTTCCTCAAGACTCATGAAGGGTCTTTTTCCAACAGGCCTTATATTGCTGCTGTTGATTATCTCACATACGGATCAGCTGATTTTGCCTTTGCTCCTTATGGACCTTACTGGAAATTCATGAAGAAACTT…		MEVHFQGYIILFLVLLVSTILVQIVLNKIRTKPRLPPSPMALPIIGHLHLLAPIPHQALHKLSNRYGSLIHIFLGSVPCVVASSPDMAKEFLKTHEGSFSNRPYIAAVDYLTYGSADFAFAPYGPYWKFMKKLCMSELLGGRTLDQLLPVRRVELTSFVQLILKKAKAAEAVDVGAELMTVTNNVISRMTMGQSCSANETKANEIRKLVKATAELSGKFNLSDFIWFCKNLDLQGFGKRLKEVRDRFDTMMERIIKEHQEARKKELGEGGEAVKGFLDILLDISEDETSEFRLSMVNIKAFIMDIFTAGTDTSATTIEWALAELINHPEVMKKARQEIDSIVGKNRLVEESDIANLRYLQAIVKETLRLHPTGPLIMRESTEACSIGGYEIPAKTRLFV…
Prunus persica v1.0	ppa019821m	PpeCYP93A91	ATGGCTAGTTTCCTTGAATACCTTGTATTTTTACTCATATGGTTAGTCTCTTTCATCTTGTTCCGAACCATCTTCACCAAGCGTAGAAGTCTCCCTCCAAGTCCACGAGCCCTACCAATCATTGGCCACCTCCACCTCCTTGGCCGCATCCCTCACCAAGGCCTGCACAAGCTTTCGAACCGCTATGGACCTTTAATTCATCTCTTCTTTGGCTCCATACCATGTGTCGTTGCCTCCTCACCAGAAATGGCCAAAGAATTCCTCAAAACCAATGAAACGTCCTTCTTGAACCGCCCCAAGATGGCGAATGTAGACTACCTCACTTATGGCTCAACGGACTTTGCCATGGCACCCTATGGACCTTACTGGAAGTTCATGAAGAAACTTTGCATGACTGAA…		MASFLEYLVFLLIWLVSFILFRTIFTKRRSLPPSPRALPIIGHLHLLGRIPHQGLHKLSNRYGPLIHLFFGSIPCVVASSPEMAKEFLKTNETSFLNRPKMANVDYLTYGSTDFAMAPYGPYWKFMKKLCMTELLGGRILEQNLPIRHDEIKRFLHVVLSKADKGEELDVGSELVRLSNNIISRMALNRRCSEQDEEAHMVRELVGEMNELAGKFNFTDMFWFCKNFDLQGYGKRLKEVRDRYDDMMGKIIKEHEDARRKRIKEREGDDGLDLLDILLDIYEDEGAEIKLSRENIKSFIMNMFGAGTDTSSSTMSWAIAELINHPNVVEKAREEIDSVVGKSRLVGESDTANLPYLQAIVKETLRLHPAGPMVVRESTEECTINGYTIPAKTRLFVNVW…
Prunus persica v1.0	ppa020637m	PpeCYP93A103	ATGGAAGCAGATTTCCAAGGCTACATTATACTTTTCCTTGTCTCCATAGTTCTGGTTCGGACCATACTCACCAAAATTCTGAACAAACCTCGGCTTCCACCAAGTCCAATGGCCTTACCAGTCATTGGACATCTCCATCTCCTTGCTCCAATTCCTCACCAAGCTTTTCACAAGCTGTCTAGCCGCTACGGTTCTTTGATACACATCTTTCTTGGTTCTGTTCCTTGTTTAGTCGCTTCGTCACCGGACATGGCCAAAGAGTTCCTCAAGACTCATGAAGGTTCCTTCTCCAGCAGGCCTTCTATGGCTGTTGTTGATTACCTCGCATATGGATCATCTGATTTTGCATTTGCTCCTTATGGACCTTACTGGAGATTCATGAAGAAACTATGTGTTTCT…		MEADFQGYIILFLVSIVLVRTILTKILNKPRLPPSPMALPVIGHLHLLAPIPHQAFHKLSSRYGSLIHIFLGSVPCLVASSPDMAKEFLKTHEGSFSSRPSMAVVDYLAYGSSDFAFAPYGPYWRFMKKLCVSELLGGRTLDQLLPVRREELISFVQLIRKKAKAAEAVDVGAALMTITNNIITRMTMGQSWSKNERDADVVRKVVKATAELKGKLNLSDLIWFCKNLDLQGFGKRVKELRDTFNTMVERVIEEHQEARKKRKELGEGGDGVKDLLDILLDISEDETSEFRLSRINIKAFIMNIFAAGTDTSAITTEWALAELINHPEVMKKARQEIDSIVGKNRLVQESDISNLPYLQAIMKETLRLHPTSPLIARESTEACNIVGYEIPAKTRLYVN…
Prunus persica v1.0	ppa022312m	PpeCYP93A104	ATGGAAGCAGAATTTCAAAGCTACATTATACTTTTCCTTGTCTCCATAGTTCTGGTTCGAACCATACTCACCAAAATTCAGAACAAACCTCGGCCTCCACCAAGTCCAATGGCCTTACCAGTCATTGGACACCTCCACCTCCTTGCTTTAATTCCTCACCAAGCTTTTCACAAGCTGTCTAGCCGCTATGGTTCTTTGATTCACATCTTTCTTGGTTCTGTTCCTTGTTTAGTCGCTTCCTCACCGGACATGGCAAAAGAGTTCCTCAAGACTCATGAAGGTTCCTTCTCCAGCAGGCCCTCTATGGCTGTTGTTGATTACCTCGCATATGGATCGTCTGATTTTGTATTTGCTCCTTATGGACCTTACTGGAAATTCATGAAGAAACTATGTGTTTCT…		MEAEFQSYIILFLVSIVLVRTILTKIQNKPRPPPSPMALPVIGHLHLLALIPHQAFHKLSSRYGSLIHIFLGSVPCLVASSPDMAKEFLKTHEGSFSSRPSMAVVDYLAYGSSDFVFAPYGPYWKFMKKLCVSELLGGRTLDQLLPVRHEELTSFVQLIRKKAKAAEAFDVGAALITITNNIITRMTMGQSWSKNERDADVVRKVVKNLDLQGFGKRVKELRDTFDTMMERVIEEHQETRKKRKELGEGCDAVKDLLDILLDISEDETSEFRLSRINIKAFIMNIFAAGTDTSAITTEWALAELINHPEVMKKAIQEIDSIVGKNRLVQESDIANLPYLQAIVKETPAAPLIVRESTEACSIGGYEIPAKTRLFVNVWAINRDPNHWEKPLEFEPERFV…
Prunus persica v1.0	ppa024661m	PpeCYP93A90	ATGGAAGTAGATTTCCAAGGCTACATCATACTTTTCCTTGTGTGGCTAGTCTCCACAATTCTTGTTCGAATCGTACTCACCAAAATTCGAACCAAGCCTCACCTTCCACCAAGTCCGATGGCCTTACCAATCATTGGACACCTCCACCTCCTGGCTCCGATACCTCACCAAGCTCTTCACAAGCTGTCAAACCGCTATGGATCTTTGATTCACATCTTTCTTGGTTCTGTCCCTTGTGTAGTCGCTTCCTCACCCGACATAGCCAAAGAGTTCCTCAAGACTCATGAAGGGTCTTTTTCCAACAGGCCTTATATTGCTGCTGTTGATTATCTCACATATGGATCAGCTGATTTTTCATTTGCTCCTTATGGACCTTACTGGAAATTCATGAAGAAACTT…		MEVDFQGYIILFLVWLVSTILVRIVLTKIRTKPHLPPSPMALPIIGHLHLLAPIPHQALHKLSNRYGSLIHIFLGSVPCVVASSPDIAKEFLKTHEGSFSNRPYIAAVDYLTYGSADFSFAPYGPYWKFMKKLCMSELLGGRTLDQLLPVRREELTSFVQLILKKAKAAEDVDVGAELMTVTNNVISRMTMGQSCSANETEANEIRKLVKATAELSGKFNLSDFIWFCKNLDLQGFGKRLKEARDRFDTMMERIIKEHQEARKKKKELGEGGEAVKGFLDILLDISEDETSEFRLSMVNIKAFIMDIFTAGTDTSAITTEWALAELINHPEVMKKARQEIDSIVGKNRLVEESDIANLRYLQAIVKETLRLHPTGPLILRESTEACSIGGYEIPAKTRL…
Malus domestica v1.0	MDP0000728757	MdoCYP93A105	ATGGAAGTAGATTTCCAAGGATACATCATACTTTTCCTCGTGTGGCTAGTCTCCACAGTTTTGGTCCGAATCATGCTCACCAAATTTCGGACCAAGCCTCGCCTTCCACCAAGTCCGATGGCCTTGCCGATCCTCGGACACCTCCACCTCCTTGCTCCAATACYTCACCAAGCTCTTCACAAGCTATCCAACCGATATGGGTCTCTGATTCACCTCTTTCTTGGTTCCGTCCCCTGCGTAGTTGCTTCCACGCCAGAGATGGCGAAAGAGTTCCTCAAAACTCATGAGGGTTCTTTCTCCAACAGGCCCTATATTTCTGCTGTTGATTACCTCACKTACGGATCAGCTGATTTTTCATTTGCTCCTTATGGWCCTTATTGGAAGTTCATGAAGAAACTA…		MEVDFQGYIILFLVWLVSTVLVRIMLTKFRTKPRLPPSPMALPILGHLHLLAPI?HQALHKLSNRYGSLIHLFLGSVPCVVASTPEMAKEFLKTHEGSFSNRPYISAVDYL?YGSADFSFAPY?PYWKFMKKLCMSELLGGRTLDQLLPVRREELASFVQLLLNKAKAAEPVDVGAELMTVTNNVISRMIMGQSCSSNEKEA?EIRKQVKAIAELTGKFNLSDFIWFCKNLDLQGFGKQLKEVRDRFDVMMERIIKEHQEERKKKEVGEGGGDAVKDLLDILLDIAEDETSEFRLTRENIKAFILDIFSAGTDTSAITTEWALAELINHPDVMQKARQEIDTIIGTNRLVQESDIANLPYLQAIVKETLRLHPTGPLIVRESSEFCTIGGYDIPAKTRL…
Fragaria vesca v1.1	mrna20358.1v1.0hybrid	FveCYP93A106	ATGGAAACAGATTTCCAAGGCTACATCATACTCTTCCTTGTTTGGCTAGTCTCCACAATCCTTGTCCGAACCATATTGGCCAAATTTCGGACCAATTCTCGCCTTCCACCAAGTCCAATGGCATTACCAATCATTGGACACCTTCACCTCCTTGCCCCAATACCTCACCAAGCTCTTCACAAGCTATCAAACCGCCTTGGACCTTTAGTGCACATCTTTCTGGGTTCTGTCCCTTGTGTAGTTGTTTCATCCCCCGAAATGGCGAAAGAGTTTCTCAAGACTCATGAAGCTTCCTTCTCCAACAGACCACATATGGCTGCTGTTGATTATCTTACATACGGGTCAGCTGATTTTTCGTTTGCGCCTTATGGACCCTACTGGAAATTCATGAAGAAACTT…		METDFQGYIILFLVWLVSTILVRTILAKFRTNSRLPPSPMALPIIGHLHLLAPIPHQALHKLSNRLGPLVHIFLGSVPCVVVSSPEMAKEFLKTHEASFSNRPHMAAVDYLTYGSADFSFAPYGPYWKFMKKLCMSELLGGRTLDQLLPVRREEMTSFIDLMLNKAKANEAVDVGAELMNVTNNIISRMLMGQGCSASEKEADEVRKLVKAVAELTGKFNLSDFIWFCKNLDLQGFGKNLKKVRDQFDTMMERIIKEHQEALKKKKVAESDGYVKDLLDILLDISEDETSEIRLTRENIKAFILDIFAAGTDTSAITTEWALAELINHPDIMNKARQEINTIIGNNRLVQESDIANLPYLQAIVKETLRLHPTGPLIVRESTEPCSIGGYDIPARTRLF…
Cucumis sativus v1.0	Cucsa.038050.1	CsaCYP93A83	ATGGAGGATTTCGAAAGCTACATAATTCTCTTCTTCATATGCCCTTTTGCTCTCCCCATCATTGGCCATCTCCATCTCCTCGGTCCGTTGCCCCACAAAGCTTTCCACAAGCTGTCGAACCGCCATGGACCTCTAATGCACCTCCGCTTAGGATCAGTCCCTTGCGTTGTAGTTTCCTCACCTGAAACCGCAAAACAAGTCCTCAAAACTCAGGAATCTTCCTTCTCAAATAGACCTCATTTGTCAGCAGTTGACTATCTAACCTATGGCTCAGCTGATTTCTCCTTTGCTCCTTATGGACCTTATTGGAAGTTCATGAAGAAACTTTGTATGTCGGAGCTCCTCGGAGGAAGAACGCTCGACAGCCTCCGTCCCATGAGAGAGGACGAGATTCGTCGG…		MEDFESYIILFFICPFALPIIGHLHLLGPLPHKAFHKLSNRHGPLMHLRLGSVPCVVVSSPETAKQVLKTQESSFSNRPHLSAVDYLTYGSADFSFAPYGPYWKFMKKLCMSELLGGRTLDSLRPMREDEIRRFLRSLQSKAADGKEVDVGGELMRLSNNVISRMTLGKRCAEEEEEAEGIRKLVKDIAVLTGTFNVSDYIWFCKNLDLQRLGKRLKEVRERFDEMMERMIKEHEDNCSDGKVKDLLDILLLKFGDENSEVKLTRENIKAFVLDIFAAGTDASAITIEWALAELINHPNIMRKAREEIHKVVGNNKVIEESDIPNLPYLQAIVKETLRLHSSPLIVRESTESCTINGYEIAPKTQVYVNVWAIGRDPNYWENPLEFEPERFMDKEGSSS…
Cucumis sativus v1.0	Cucsa.242900.1	CsaCYP93A84	ATGGCTGATTTTTCAGACTACTTTCTTCTTCTCTCTCTCTTGTTAACCTCCTTCCTCTTCGTTCAACTTCTCTTCACTTGGCTCCGCCCTGACAAGCTTCGTCGTCCACCGAGCCCACCCTCCTTGCCAGTCATCGGCCACCTCCACCACCTTGGTCGAATCCCTCACCAAGCTCTTTACAAATTGTCATGTCAATATGGACCATTAATACATCTCTTCTTTGGCTCTAACCCTTGTGTTATTGTCTCTAATTCAGAAATGGCTAAACAATTCCTCAAAACTAATGAATCCTCCTTTTTGAACCGACCCATTAGACTCAACATAAACTATCTCACCTACGGCTCTAAGGACTTCACTTTTGCACCCTATGGACCCTATTGGAAGTTCTTGAAAAAATTG…		MADFSDYFLLLSLLLTSFLFVQLLFTWLRPDKLRRPPSPPSLPVIGHLHHLGRIPHQALYKLSCQYGPLIHLFFGSNPCVIVSNSEMAKQFLKTNESSFLNRPIRLNINYLTYGSKDFTFAPYGPYWKFLKKLCMTELLSSRTLDLYSPIRDEEMRLFVQRIHEQAIVGATVDVGAELSRLMNNVISRMALRRRCSEEDNGSEEVGKLVGEMCELAGALNVADMIWFCKRLDLQGFGSRVRNVRKRYDIMMEKIINEHEEERKRKREDGEDDGVKDLLDILLDIYEDQTSEIKLTRDNIKAFVMNIFGAGTETSAAATEWALAELINNPSAMAKATQELHSVTGNTRLLLESDLFKLPYLQAVVKETLRLHPTAPLIVREATESCAVAGYHIPAKTRLL…
Citrullus lanatus v1.0	cl__Cla000744	ClaCYP93A83	ATGGCGGATTTCCCAAGCTACATAATTCTCTTCCTCATATGGTTCGTTTCCACCTTCACAATTCGCTTCATCTTTGCCAAAAACAAACATAACTCTCGTCTTCCTCCAAGCCCTTTTGCTCTCCCCATCATTGGCCATCTCCATCTCCTCGGTCCGTTGCCCCACAAAGCTTTCCACAAGCTCTCGACCCGCCATGGACCCTTAATGCACCTCCATTTAGGATCGGTCCCTTGCGTCGTAGTTTCGTCACCCGAAACAGCAAAACAAGTCCTCAAAACATTTGAATCTTCCTTCTCCAATAGACCCCATTTGTCAGCAGTTGACTATCTAACCTATGGCTCAGCTGATTTCTCCTTTGCTCCCTATGGACCTTATTGGAAGTTCATGAAGAAACTTTGT…		MADFPSYIILFLIWFVSTFTIRFIFAKNKHNSRLPPSPFALPIIGHLHLLGPLPHKAFHKLSTRHGPLMHLHLGSVPCVVVSSPETAKQVLKTFESSFSNRPHLSAVDYLTYGSADFSFAPYGPYWKFMKKLCMSELLGGRTLDSLRPMREDEMRWFLRSLQLKAAEGKEVDVGGELMRLSNNVISRMTLGKRCAEEEEEAEGIRKLVKDVAELSGTFNVSDYIWFCKNLDLQGLGKRLKEVHERFDEMMERMIKEHEENSGDGKVKDLLDILLLKFGDQNSEVKLTRENIKAFVMDIFTAGTDASAITIEWALAELINHPNIMEKAREEVHRVVGKNRVIEESDIVNLPYLRAIVKETLRLHSSPLVVRESTESCTINGYEIPPKTQVYVNVWAIGRD…
Citrullus lanatus v1.0	cl__Cla017519	ClaCYP93A84	ATGGCTAATCCAGACTACCTTCTTCTTCTCTCTCTCTTGTTGACCTCCTTTCTCTTTGTTCAAGTCATCTTCACTCGAATTCGACCCGACAGGCTTCGTCGTCCACCAAGCCCTCCGTCGTGGCCGGTGGTCGGCCACCTCCACCTCCTTGGTAGAATCCCTCACCAAGCCTTTCACAAACTGTCATGTCAATATGGACCATTAATGCATCTCTTCTTGGGCTCTAAGCGTTGTGTTATTGTCTCCAATTCAGAAATGGCTAAACAATTCCTCAAAACTAATGAATCCTTCTTTCTTAACAGACCCATTAGACTCAACATAAACTATCTCACTTATGGCTCTGCGGACTTCACTTTTGCACCCTATGGACCCTATTGGAAGTTCTTGAAAAAGCTTTGC…		MANPDYLLLLSLLLTSFLFVQVIFTRIRPDRLRRPPSPPSWPVVGHLHLLGRIPHQAFHKLSCQYGPLMHLFLGSKRCVIVSNSEMAKQFLKTNESFFLNRPIRLNINYLTYGSADFTFAPYGPYWKFLKKLCMTELLGGRTLDLHRPIRDKEMRLFVQRIHEQAIVGKMVDVGAELSRLMNNIISRMALRRRCSEKEDGSEEVGKLVGEMCELAGELNIADMIWFCKGLDLQGFRRRVKDVRNRYDIMMEKILKEHEQHRKKKKDDGVKDFLDVLLHIYEDKTSQIKLTRENIKAFVMNIFGAGTETSAAATEWALAELINNPSAMAKATQELDSITGKTRLLHESDLPNLPYLQAVVKETLRLHPTAPLIVREATESCTVAGYHIPAKTRLLVNVWS…
Glycine max Wm82.a2.v1	Glyma.02G176200.1	GmaCYP93A24	ATGAACGATATTCAAGGGTACGTGCCAATACTCCTTGTTTGGCTAGCCTCAATAATATTGCTCCAAGCCATATTCAAAACCTCAAAATTTCGCCTTCCTCCTAGTCCATTTGCCTTGCCAATTATTGGGCACTTCCACTTACTAAAACTACCCCTTCACAGATCTTTTCAGAAGCTCTCAAATCGCTATGGACCCTTGATTCACATCTACATTGGCTCTACACTCACTGTTGTTGTTTCCTCTTCAGAAATAGCCAAAGAGATCTTCAAAACCCATGACCTTTCCTTCTCCAATAGACCAGCAAATGTTGCTATTAACTACCTCACTTACAACTCATCTGATTTCGGATTTGCTCCTTATGGACCCTACTGGAAGTTCATGAAGAAACTTTGCATGTCA…		MNDIQGYVPILLVWLASIILLQAIFKTSKFRLPPSPFALPIIGHFHLLKLPLHRSFQKLSNRYGPLIHIYIGSTLTVVVSSSEIAKEIFKTHDLSFSNRPANVAINYLTYNSSDFGFAPYGPYWKFMKKLCMSELLNGKMLDQLLPVRQEEIHRFLLMMKLKGEACEVVNVGDEFLKLTNSIVMRMAIGKSCFRNDDEAHKVTERIKESSKVSGMFNLEDYFWFCRGLDLQGIGKKLKVVHERFDTMMECIIREHEEARNKSTEKDAPKDVLDALLSISEDQNSEVKITRDNIKAFLVDMFTGGTDTTAVTLEWSLAELINHPTVMEKARKEIDSIIGKDRMVMEIDIDNLPYLQAIVKETLRLHPPSPFVLRESTRNCTIAGYDIPAKTQVFTNVWAI…
Glycine max Wm82.a2.v1	Glyma.03G142000.1	GmaCYP93A26	ATGGCTGATTACCAAGGCACCATCATACTTTTCATCATATGGCTAGTCTCCACAATAGTGGTTCGAGCCATAGTCAGCAAAAAACAGAACAAGACTAATAGACCACCAAGTCCACTAGCCTTACCCATCATTGGACATCTCCACCTTCTTGCTCCAATACCTCACCAAGCTCTTCACAAGCTCTCCACCCGCCATGGACCCATAATGCACCTTCTCCTTGGCTCCGTGCCATGTGTCGTGGCTTCCACACCAGAAGCCGCCAAAGAATTCCTCAAAACTCACGAAAACTCCTTCTCCAACCGCCCGCAAAGTTTTGCGGTTGATTATCTAACATATGGCTCGCAGGACTTCTCTTTCGCGCCATATGGACCGTATTGGAAATTCATGAAGAAAATATGC…		MADYQGTIILFIIWLVSTIVVRAIVSKKQNKTNRPPSPLALPIIGHLHLLAPIPHQALHKLSTRHGPIMHLLLGSVPCVVASTPEAAKEFLKTHENSFSNRPQSFAVDYLTYGSQDFSFAPYGPYWKFMKKICMSELLGGHTLSQLLPVRRQETLRFLRLMLQRGKAAEAIDVGRELLRLSNNVVSRMIMSQTCSEDDSEAEEVRKLVQDTVHLTGKFNVSDFIWFLRKWDLQGFGKGLKEIRDRFDAIMERAIKKHEEERKKRREEGSGGEGHIKDLLDVLLDIHEDENSDIKLTKENIKAFILDVFMAGTDTAALTTEWALAELINHPHVMERARQEIDAVIGNGRIVEESDIANLSYLQAVVKETLRIHPTGPMIIRESSESSTIWGYEIPAKTQL…
Glycine max Wm82.a2.v1	Glyma.03G142100.1	GmaCYP93A3	ATGGCTTTTCAAGTGTTGTTCATTTGTTTGATCTCAACCATCGTGTTTGCATCCATACTATGGAGAAAACAAAACAAAAACAAGACCCTTCTTCCACCGAGTCCAATGCCCCTACCCATCATTGGACACCTCCACCTTCTTTCTCCAACACCTCACCAAGATTTTCACAAGCTCTCACTCCGCTATGGACCCATAATACACCTTTTTCTTGGTTCAGTCCCCTGTGTGGTGGCTTCCACAGCAGAAGCCGCCAAAGAGTTCCTCAAAACTCACGAACCCGCCTTCTCCAACCGCCCCGCTAACACTGTCGCCGTCGAAACCTTAACCTACGGTTTCCAAGACTTCTTGTTCGCACCCTACGGACCCTATTGGAAGTTCATGAAGAAACTCTGCATGTCC…		MAFQVLFICLISTIVFASILWRKQNKNKTLLPPSPMPLPIIGHLHLLSPTPHQDFHKLSLRYGPIIHLFLGSVPCVVASTAEAAKEFLKTHEPAFSNRPANTVAVETLTYGFQDFLFAPYGPYWKFMKKLCMSELLGGHMLDQFLPVRQQETKKFIKRVLQKGISGEAVDFGGEFITLSNNIVSRMIVSQTSTTEDENEVEEMRKLVKDAAELSGKFNISDFVSFLKRFDLQGFNKRLEKIRDCFDTVLDRIIKQREEERRNKNETVGKREFKDMLDVLFDISEDESSEIKLNKENIKAFILDILIAGTDTSAVTMEWAMAELINNPGVLEKARQEMDAVVGKSRIVEESDIANLPYLQGIVRETLRLHPAGPLLFRESSRRAVVCGYDIPAKTRLFVN…
Glycine max Wm82.a2.v1	Glyma.03G143700.1	GmaCYP93A1	ATGGCTTATCAAGTGTTGCTAATTTGTTTGGTCTCCACCATAGTGTTTGCATACATACTATGGAGAAAACAAAGCAAGAAAAACCTTCCACCAAGTCCAAAGGCCCTTCCCATAATTGGCCACCTCCACCTTGTGTCCCCAATTCCCCACCAAGATTTTTACAAGCTCTCAACCCGCCACGGACCCATCATGCAACTTTTCCTTGGCTCAGTCCCTTGTGTGGTGGCTTCCACCGCAGAAGCCGCCAAAGAGTTCCTTAAAACCCACGAAATCAACTTCTCCAACCGCCCCGGCCAAAACGTCGCCGTTAAGGGCTTAGCCTACGATTCCCAAGACTTCCTTTTCGCGTTTGCACCCTTCGGACCCTACTGGAAGTTCATGAAGAAACTCTGCATGTCC…		MAYQVLLICLVSTIVFAYILWRKQSKKNLPPSPKALPIIGHLHLVSPIPHQDFYKLSTRHGPIMQLFLGSVPCVVASTAEAAKEFLKTHEINFSNRPGQNVAVKGLAYDSQDFLFAFAPFGPYWKFMKKLCMSELLSGRMMDQFLPVRQQETKRFISRVFRKGVAGEAVDFGDELMTLSNNIVSRMTLSQKTSENDNQAEEMKKLVSNIAELMGKFNVSDFIWYLKPFDLQGFNRKIKETRDRFDVVVDGIIKQRQEERRKNKETGTAKQFKDMLDVLLDMHEDENAEIKLDKKNIKAFIMDIFVAGTDTSAVSIEWAMAELINNPDVLEKARQEIDAVVGKSRMVEESDIANLPYLQAIVRETLRLHPGGPLVVRESSKSAVVCGYDIPAKTRLFVNV…
Glycine max Wm82.a2.v1	Glyma.10G092500.1	GmaCYP93A19	ATGGCTGAAACTGACATCCAAGACTATCTCCAACTCTTCTTCCTCTGGTTACTCTCCATCATCGCCGTTAGAGCCATACTCACCAAACTCCGCCACAAGCCTCGCCGTCCACCGGGCCCACGGTCCCTCCCCATCATCGGCCACCTCCATCTCATCTCCGCCCTGCCTCACCAGTCTTTCCACGCGCTCTCCACGCGCTACGGCCCCGCCGTGCAAGTCTTCCTCGGCTCCGTCCCCGCCGTGGTCGTTTCGTGCCCGGAACTCGCGAAGGAGTTCCTGAAAACGCACGAGCCCAGCTTCTCGAACCGGTTCGTGAGTGCAGCGGTTCACCACCTGTCCTATGGGTCCAAGGGGTTCCTCTTCGCGCCCTACGGAAGCTACTGGAGGTTCTTGAAGAAG…		MAETDIQDYLQLFFLWLLSIIAVRAILTKLRHKPRRPPGPRSLPIIGHLHLISALPHQSFHALSTRYGPAVQVFLGSVPAVVVSCPELAKEFLKTHEPSFSNRFVSAAVHHLSYGSKGFLFAPYGSYWRFLKKICMSELLGGRTLDQFRHLREQETLRFLRVLRAKGEAHEAVDVSGELMTLTNSVISRMVLSRTCCESDGDVEHVRKMVADTAELAGKFNVADFVWLCKGLDLHGIKKRLVGILERFDGMMERVIREHEEERERRKERGEGEEIRDLLDILLEIHQDESREIKLSRENVKAFILDIYMAGTDTSAITMEWALAELINNHHVMEKARQEIDSVTGNQRLIQESDLPNLPYLQAIVKETLRIHPTAPLLGRESSESCNVCGYDIPAKSLV…
Glycine max Wm82.a2.v1	Glyma.10G092600.1	GmaCYP93A30	ATGGCTGATTTTGGTGACTATTTTGGGTTGCTTTTCATTTGGCTAGCCTCCATCTTCATTTTACGTGTAATATTATTCACAAAGTCTCGCATCAAGTCACGTCTACCCCCAAGTCCTAGAGCCCTCCCTGTGTTAGGACACCTCTACCTCCTCACCAAGCTCCCCCACCAAGCATTCCACAACATCTCAATACGTTATGGTCCTTTGGTCTACCTCTTGTTCGGTTCCAAGCCTTGTGTTCTTGTTTCATCACCCGAAATGGCAAGACAATGCCTCAAAACCCACGAAACATGTTTCCTAAACCGACCCAAAAGAACCAATTTGGACTACATCACATACGGTTCTTCAGATTTTGTGTTGGCACCCTATGGACCCTATTGGAGCTTCATGAAGAGGCTT…		MADFGDYFGLLFIWLASIFILRVILFTKSRIKSRLPPSPRALPVLGHLYLLTKLPHQAFHNISIRYGPLVYLLFGSKPCVLVSSPEMARQCLKTHETCFLNRPKRTNLDYITYGSSDFVLAPYGPYWSFMKRLCMTELLGGRMLHQHLPIREEETKLFFKSMMKKACFGEEVNIGKELAMLANNIITRMALGRRCCDDVEGEGDQLIELVKEMTELGGKFNLGDMLWFVKRLDLQGFGKRLESVRSRYDAIMEKIMKEHEDARKKEMGGDEAVRDLLDILLDIYNDESSEIGLTRENIKAFIMNMFGAGTETSATTIEWALAELINHPDIMLKARQEIDSVVGKNRLVEESDILNLPYVQSIVKETMRLHPTGPLIVRQSTEDCNVNGYDIPAMTTLFV…
Glycine max Wm82.a2.v1	Glyma.19G144700.1	GmaCYP93A2	ATGGCTTATCAAGTGTTGGTGATTTGTGTGGTCTCCAGCATAGTGTTTGCATACATAGTATGGAGAAAAGAAAGGAAGAAAAAGCTTCCACCGAGTCCAAAGGGCCTTCCCATCATTGGGCACCTCCACCTTGTGTCCCCAATACCCCACCAAGATTTTTACAAGCTCTCACTCCGCCATGGACCCATCATGCAACTTTTCCTCGGCTCAGTCCCTTGTGTGGTGGCTTCCACCGCGGAAGCCGCCAAAGAGTTCCTCAAAACCCACGAAATCAACTTCTCCAACCGCCCCGGCCAAAACGTCGCCGTTCAGTTCTTAACCTACGTGTTTGGCCCTTACGGACCCTCCGTGAAGTTCATCAAGAAACTTTGCATGTCCGAACTCCTCGGTGGGCGCATG…		MAYQVLVICVVSSIVFAYIVWRKERKKKLPPSPKGLPIIGHLHLVSPIPHQDFYKLSLRHGPIMQLFLGSVPCVVASTAEAAKEFLKTHEINFSNRPGQNVAVQFLTYVFGPYGPSVKFIKKLCMSELLGGRMLDQFLPVRQQETKKFIKRVLQKGIAGEAVDFGGEFMRLSNNIISRMTMNQTSSEDEKQAEEMRMLVADVAELMGTFNVSDFIWFLKPFDLQGFNKRIRKTRIRFDAVLDRIIKQREEERRNNKEIGGTRQFKDILDVLLDIGEDDSSEIKLTKENIKAFIMDIFVAGTDTSAATMEWAMAELINNPCVLEKARQEIDAVVGNSRIIEESDIVNLPYLQAIVRETLRIHPGGPLIVRESSKSVVVCGYEIPAKTRLFVNVWAIGRDP…
Glycine max Wm82.a2.v1	Glyma.19G146800.1	GmaCYP93A41	ATGGCTTATCAAGTGTTGGTGATTTGTGTGGTCTCCAGCATAGTGTTTGCATACATAGTATGGAGAAAAGAAAGGAAGAAAAAGCTTCCACCGAGTCCAAAGGGCCTTCCCATCATTGGGCACCTCCACCTTGTGTCCCCAATACCCCACCAAGATTTTTACAAGCTCTCACTCCGCCATGGACCCATCATGCAACTTTTCCTCGGCTCAGTCCCTTGTGTGGTGGCTTCCACCGCGGAAGCCGCCAAAGAGTTCCTCAAAACCCACGAAATCAACTTCTCCAACCGCCCCGGCCAAAACGTCGCCGTTAAAGGCCTTGCCTACGATTCCCAGGACTTCCTTTTCGCATTTGCACCCTTCGGACCCTACTGGAAGTTCATGAAGAAACTCTGCATGTCC…		MAYQVLVICVVSSIVFAYIVWRKERKKKLPPSPKGLPIIGHLHLVSPIPHQDFYKLSLRHGPIMQLFLGSVPCVVASTAEAAKEFLKTHEINFSNRPGQNVAVKGLAYDSQDFLFAFAPFGPYWKFMKKLCMSELLSGRMMDQFLPVRQQETKRFISRVFRKGVAGEPVDFGDELMTLSNNVVSRMTLSQKTSDNDNQAEEMKKLVSDIAELMGKFNVSDFIWYLKPFDLQGFNKKIKETRDRFDVVVDGIIKQREEERMKNKETGTARQFKDMLDVLLDMHEDKNAEIKLDKKNIKAFIMDIFVAGTDTSAVSIEWAMAELINNPHVLEKARQEIDAVVGKSRMVEESDIANLPYLQAIVRETLRLHPGGPLIVRESSKSAVVCGYDIPAKTRLFVNV…
Medicago truncatula Mt4.0v1	Medtr0171s0010.1	MtrCYP93A71	ATGGCTGAAATGCAATACTATATCCAACTTTTTTTTGTTTTGGTAATATCCACCGTTGCAATTCAAACCCTACTTACTAGAAAGAAGAACAAAAAACATCTTACACCACCAAGCCCTCTTGCCTTACCTATCTTTGGACATTTTCACCTTATGTCTAAGTTACTACCAGCTCACCAAAGTTTTCACAAGCTTTCAATTCAATATGGACCCATAATGAAACTCTTTCTAGGCTCTGTGCCTTGTATAGTAATTTCTAGTCCGGAAATAGCCAAGGAGTTTCTTAAAACACACGAAACTTTCTTCTCGAATCGTTTAATAAACTACGCTATTGACTACTTATCATATGGCTCACAGGATTTCATGTTTGCGCCTTATGGTGAATATTGGAAGTTCATGAAA…		MAEMQYYIQLFFVLVISTVAIQTLLTRKKNKKHLTPPSPLALPIFGHFHLMSKLLPAHQSFHKLSIQYGPIMKLFLGSVPCIVISSPEIAKEFLKTHETFFSNRLINYAIDYLSYGSQDFMFAPYGEYWKFMKKICMSELLGGRTIDQFRPLRQQETVRFLRLLQKKGEAGEAVDVSGLLLNLTNRIITRMTMSKTFNENDSNVEDLRNMVHDFSELAGKFSMLEYIWFCKNLHRYRISKRLKGMQKRMETMMEMAIRDRQKERKKIKENSEGSHVRDLLDILLEIHENNNTEIGIKLNKENVTSFIVDIFLAGTDTSSTTIEWGLAELINNPRVMAKAREEIDSVTGKSRLIQESDLPNLPYLQAILKETLRLHPTVPLVVRESSENCNVCGFEIPRK…
Medicago truncatula Mt4.0v1	Medtr0171s0020.1	MtrCYP93A72	ATGGCTGAAATGTTAGACTATATCAGACTTTTATTCGTTTGGCTACTCTCTACCATTGCAATTCAAGCCATACTAACTAGAAAGAAGAACAAAAATCATCCTAGTACTCCCCCCACCCCTCCTGCTCTGCCTATCATAGGACATTTTCACCTTATAGCTAAGTTACCTCCCCATCAAAGTTTTCATAAGCTTTCAATTCGTTATGGACCCATAATGCAACTTTTCATTGGATCTATACCTTGTGTAGTAATTTCCAGTCCAGACATTGTCAAGGAGTTTCTTAAAACTCACGAATCTTACTTCTCGAATCGCTTTATAAGTTCAGTTATTCACAACTTAACATATGGCTCAAAGGATTTCATATTTGCGCCTTATGGTGAATACTGGAAGTTCATAAAA…		MAEMLDYIRLLFVWLLSTIAIQAILTRKKNKNHPSTPPTPPALPIIGHFHLIAKLPPHQSFHKLSIRYGPIMQLFIGSIPCVVISSPDIVKEFLKTHESYFSNRFISSVIHNLTYGSKDFIFAPYGEYWKFIKKICMSELLGGRTLDKFLPLRQKETMRFLRLLQTKGEAREAVNVGGELLNLTNRIITTMAMSKTCAENDSDVEDIRKMVQDSVELSGRFNLSDFIWFFKNWDMQGFNKRLKVVMERFDTLMERVIREHQVEMKKRKEKGEGDHVRDLLDILLEMHENENTEIKLTRENVKALILDIFMAGTETSATTIEWALAELINNPHVMEKARKEIDSQIGRSRLIQESDLPNLPYLRATLKETLRLHPTVPVVVRESSENCNVCGFEIPAKTI…
Medicago truncatula Mt4.0v1	Medtr0171s0030.1	MtrCYP93A73	ATGACAAAGGAGTTTCTTAAAACTCATGAAACTTCCTTCTCTAATCGCTTAATAAATGGTGTCGTTCGCTACTTATCATATGGCGCAAACGATTTTATGTTTGCACCTTATGGTGACTACTGGAAGTTCATGAAAAAGATATGCATGTCCGAGCTTCTTGGTGGAAGAACTCTTGATCAATTTCGTCCATTGAGGCAACAAGAGACTTTGAGGCTTCTTAATGTTTTGAAGAAGAATGGGGAAACCGGTGAGGCGGTTGATGTTGGTGCAGAGCTCTTGCGTCTAACAAATAGAATTATGACAAGGACGACAATAACTAAAACTTGTTGCGAAAATGGTTTTGATGTGGAAGACATTAGGAAGTTGGTTAAAGATTGTTCAGAACTTGGAGGGCAGTTT…		MTKEFLKTHETSFSNRLINGVVRYLSYGANDFMFAPYGDYWKFMKKICMSELLGGRTLDQFRPLRQQETLRLLNVLKKNGETGEAVDVGAELLRLTNRIMTRTTITKTCCENGFDVEDIRKLVKDCSELGGQFNLSDFIWFFKNWDLQGFNKRLKELMNMFDTMIESVIREHQEEMKKRKENGEGAHVKDLLDILLEIHEDESSEIKLTRKNVKAFIFDMFLSGTDTSSTTIEWALAELINNPHIMQKARQEIDSLTGKSRLIQESDLPNLPYLRAILKETLRLHPTIPTMVRESSERCNVSGFDIPAKTILYVNFWSMNRNPKLWENPLEFKPERFMSEGNKFDLRGQNFQFIPFGFGRRACPGTSFALQVVPTNLAAIIQCFELKVGGNGTVSMEEK…
Medicago truncatula Mt4.0v1	Medtr0181s0030.1	MtrCYP93A74	ATGTCTGAAATGCAATATATCCAACTTTTCTTTGTTTGGCTACTCTCCATTATAGCAGTTCGAGCCATACTAACTAGAAAGAAGAACAAGAACCGCCGTACTCCACCGTCTCCTCCAGCCTTACCTATCATTGGACACCTTCACCTTATTTCTAAAGTACCTCACCAAAGTTTTCACAAACTCTCAAAACACTATGGTCCTATAATGCAACTTTTTCTTGGCTCTAAGCGATGTATAGTAACTTCAAGTCCAAATATCGCAAAGGAGTTTCTAAAAACCAATGAAACTTTCTTCTCGAACCGTTTTGCAAATGCTGCAGTTCAGCAAATAGAATATGGCTCAAAGGGATTTGTGTTTGCACCCTATGGTGACTATTGGAAGTTTGTTAAGAAGTTGTGC…		MSEMQYIQLFFVWLLSIIAVRAILTRKKNKNRRTPPSPPALPIIGHLHLISKVPHQSFHKLSKHYGPIMQLFLGSKRCIVTSSPNIAKEFLKTNETFFSNRFANAAVQQIEYGSKGFVFAPYGDYWKFVKKLCMSELLGKRTLDQFLPLMQQESLRFLKLLQKIGEAGNAVDVGGELLTLTNNIIARMAISKTCSENDSEVEEIREMLKDILELGGTFNVSDFIWVCKNLDLQGIHKRLKVAMERFDIMLERAIREHQEKRKVKGEGAHDRDILDILLEKLEDKSYEITLTRENIKAFIMDMFIAGTDTSAITMEWALAELINNPHIMEKARQEIDSVTENSRLIQEPDLPKLPYLHAILKETLRIHPTVPLIVKEASESCVVYGYDIPAKTILFVDLW…
Medicago truncatula Mt4.0v1	Medtr3g020780.1	MtrCYP93A78	ATGGTTGATTTTAGTGACTATTTTGCACTCCTCCTTATTTTTCTAGCTTCAATCCTCTTGCTAAGATTGATCTTCACCATCAAGTTCCACCAAAAATCACTCCTTCCACCAAGCCCTCGCGCCTTACCCATTCTAGGACACCTTTACCTTCTAACCAAACTCCCTCACCAAGCATTTCACAACATCTCATCACGTTATGGCCCTTTGGTCTACCTTCTGTTTGGTTCCAAACCTTGTGTTCTTGTTTCTTCCCCGGAAATGGCAAAACAATGCCTCAAAACAAACGAAACTTGTTTCTTAAACCGACCAAAACAAAGCAATTTGGAATACATCACATATGGTTCATCAGATTTTGCCTTGGCTCCTTATGGAACTTATTGGAAGTTCATGAAAAAGCTT…		MVDFSDYFALLLIFLASILLLRLIFTIKFHQKSLLPPSPRALPILGHLYLLTKLPHQAFHNISSRYGPLVYLLFGSKPCVLVSSPEMAKQCLKTNETCFLNRPKQSNLEYITYGSSDFALAPYGTYWKFMKKLCMTELLGGRILHQYLPIRAEEITLFLKGMMEKADLRKEVNVGEELTMLSNNIITRMALKRRCSDVEGEGHQLIELVKEMAVLGGKFNLGDMLWFVKKLDLQGFGKRLENLRNRYDVIIERIMKEHEDTKKKNKEEINSNGIETVSDLLDILLDIYADENSEVRLTRENIKAFIMNIFGAGTESSASTIEWALAELINHRDMMEKAREEIDSIVGKKRLVEESDIPNLPYIQSIVKETLRLHPTGPLIVRQSTEDCNIGGYYIPAKT…
Medicago truncatula Mt4.0v1	Medtr7g092620.1	MtrCYP93A8	ATGGTTGATTACCAAGGTTACATCTTACTTTTCATCATATGGCTAGTATCAACAATTTTTGTAAAAGCCATACTCACAAGAAAATACAAGAAATCGAAGTTACCTCCAAGTCCATTATCTTTACCAATCATTGGACATCTTCACCTTATTGGTTCAATACCTCACCAAGGACTTCACAAACTTTCAACAAAATATGGACCTATAATACACCTTTTCCTAGGTTCCATGCCTTGTGTTGTAGCTTCCACACCAGAATCCGCTAAAGAGTTTCTTAAAACTCACGAAACCTATTTCTCCAACCGTCCTCAAAGTTCAGCTGTTGATTATCTAACATATGGCTCACAAGATTTTTCCTTTGCTCCATATGGACCTTATTGGAAATTTATCAAGAAAATATGC…		MVDYQGYILLFIIWLVSTIFVKAILTRKYKKSKLPPSPLSLPIIGHLHLIGSIPHQGLHKLSTKYGPIIHLFLGSMPCVVASTPESAKEFLKTHETYFSNRPQSSAVDYLTYGSQDFSFAPYGPYWKFIKKICMSELLGGNTLSQLLPLRRQETTRFVSFLLKKGKENEVIDVGRELLKLSNNVISRMIMSQTCSENDGEAEEVRKLVQDTVHLTGKFNISDFIWFFKNWDVQGFSKGLEEIRDRFDSMMERIIKEHQEVRRRRKEVGGGEGQIKDLLDILLDILEDESSEIKLKMENIKAFILDIFIAGTDTSALTIEWALAELINNPHMMEIARQEINDVVGNNRIVEESDIINLPYLQAIVKETLRIHPTGPLIVRESSEKCTIQGYEIPAKTQLF…
Medicago truncatula Mt4.0v1	Medtr8g468780.1	MtrCYP93A76	ATGCAACTTTTCCTAGGCTCCGTTCCTTGTATAGTAACTTCAAGTCCAAAAATAGCCAAAGAGTTTCTTAAAACTCACGAAACTTCCTTCTCCAACCGCTTTACAACTTCTGCAGTTCACTACATATCATATGGCTCAAAGGGTTTAATAATTACACCTTATGGTGACTACTGGAAATTTGTGAAGAAGATATGCATGTCAGAGCTTCTTGGTGGAAGAACCCTCGATCAACTTCGTCCCTTGAGGCAACAAGAGACTCTAAGATTTCTTAGACTTTTGGATAAGAAAGGGGAAGCCGGTGAAGCCGTTGATATTGGCGGCGAGCTGTTGACTCTATCCAATAGCATTATAACAAGGATGACAATGAGAAAAACTTTTGGTTCTAAGAATGATATTTGT…		MQLFLGSVPCIVTSSPKIAKEFLKTHETSFSNRFTTSAVHYISYGSKGLIITPYGDYWKFVKKICMSELLGGRTLDQLRPLRQQETLRFLRLLDKKGEAGEAVDIGGELLTLSNSIITRMTMRKTFGSKNDICEVKDIRKMVTDTAELAGKFNVSDFIWFCKNLDFYGMNKRLKRIRDRFDKMMERVTKEHLEEKKKRGEGAHHVRDLLDILLEIQEDESNEIKLTSENVKAFILDIFMAGTDTSAITIEWAIAELINNPHVMEKARQEIDSVTGKSRLIQESDIPNLPYIRAIVKETLRIHPTTPTIVRESSESCNIYGYEFPAKTVLFVNLWSMGRDPNLWENPLEFRPERFMSEEDNKFDARGQNFQLMPFGSGRRACPGATLALQVVPTNLAAMI…
Medicago truncatula Mt4.0v1	Medtr8g469300.1	MtrCYP93A77	ATGGCTGAAATGCAAGACTATATCCAACTTTCATTCGTTATGCTACTCTCCATAATTGCTATTCGAACCATACTAACAAGAAAGAAGAACAATAATCATCTTACTCCACCCACCCCTCCTTCCCTACCTATCATTGGACATTGTCACCTTATATCTAAGTTTCCCCACAAAAGTTTTCATAAGCTTTCAATTCAATATGGACCCATAATTCAACTTTTCCTAGGCTCTATACCTTGTATAGTAACTTCAAATCCAGAAATAGCCAAAGAGTTTCTTAAAACTCACGAAACTTCCTTCTCAAACCGCTTAAAAAATGCTGCAACTACCTACATATCATATGGATTAAAAGGTTTCATAATTACGCCTTACGGTGATTATTGGCAGTTCGTGAAGAAGATA…		MAEMQDYIQLSFVMLLSIIAIRTILTRKKNNNHLTPPTPPSLPIIGHCHLISKFPHKSFHKLSIQYGPIIQLFLGSIPCIVTSNPEIAKEFLKTHETSFSNRLKNAATTYISYGLKGFIITPYGDYWQFVKKICMSELLGVITLDQLRPLRQQETLRFLRLLQKKGETGEAIEVGGELLTLTNSIITIMTMKKTFGSENDISDVKEIRKMVTETAELVGKVNVSDFIWFFKNIDFYGMNKKLKRIRDRFDTMMDRVTKEHQEEKKKRGEGAHHVRDLLDILLEIQEDESNEIKLTSENVNAFILDIFMAGTDTAAITIEWALAELINNPHVMEKARQEIDSVTGKSRLIQESDIPNLPYMRAIIKETLRIHPTVPVIVRESSESCKVYGYEIAAKTVLF…
Phaseolus vulgaris v1.0	Phvul.001G138900.1	PvuCYP93A56	ATGGCTGATTATTACCAAGACTATATCCTGCTGTTCATCACATGTTTAGTCTCCACAATCGTGGTTCGAGCCATACTTAGCAGAAAACGAAACAAGAGTAATAGACCACCAAGTCCACAAGCCTTACCCATCATTGGACATCTCCACCTTCTTTCTCCAATACCTCACCAGGCTCTTCACAAGCTCTCTACTCGCTATGGACCCATAATGCATCTTTTCCTTGGCTCTGTGCCTTCTGCTTGTTCTCAAGAAAGGGAAGGCGGGGCTATTGATGTTGGGAGAGAACTTTTGACGCTCTCGAATAACGTTGTGTCGAGGATGATTATGAGCCAAACATGTTCTGAAGATGACAGTGAAGCTGAAGAGGTGAGGAAGTTGGTGCAAGACACAGTTCTTCTC…		MADYYQDYILLFITCLVSTIVVRAILSRKRNKSNRPPSPQALPIIGHLHLLSPIPHQALHKLSTRYGPIMHLFLGSVPSACSQEREGGAIDVGRELLTLSNNVVSRMIMSQTCSEDDSEAEEVRKLVQDTVLLIGKFNVSDFVCFFKNWDVQGFGKRLKEIRDRFDTMMERAIKEHQEERKKRKEVGNGGDGQIKDLLDVLLDIHENENSDIKLTKENIKAFILDVFMAGTDTAASTIVWALAELINHPDVMERAREEIDAVIGSGRLVEESDLVNLSYLQAIVKETLRIHPTGPLIVRESSESCTIWGYEIPPKTQLFVNVWAIGRDPKHWENPLEFRPERFLSEEENGKSQLDVRGQYFHLIPFGSGRRGCPGTSLALQVVQTNLAAMIQCFEWKVK…
Phaseolus vulgaris v1.0	Phvul.001G139600.1	PvuCYP93A58	ATGGCTTTTCAAGTGTTACTCGTTTGTTTGATCTCCACCATCGTGATTGTATTCATACTGCGAACAAAACAAAACAAGACGCTCCTTCCACCAAGTCCAATGGCCCTCCCCATCATTGGCCACCTCCACCTTCTCTCCCCATTACCTCACCAAGATTTTCACAAGCTTTCAATCCGCTATGGACCCATCATGCACCTTTTCCTCGGCTCAGTCCCTTGTTTGGTGGCTTCAACCGCAGAAGCAGCCAAAGAGTTCCTCAAAACTCACGAATCCTCCTTCTCCAACCGCCCAGTTCAAACCGTGGCCGTTGAGGCCTTAACCTACGGATTCCAAGACTTCTTCTTCGCGCCTTACGGACCCTATTGGAAGTTCATGAAGAAACTGTGCATGTCTGAACTT…		MAFQVLLVCLISTIVIVFILRTKQNKTLLPPSPMALPIIGHLHLLSPLPHQDFHKLSIRYGPIMHLFLGSVPCLVASTAEAAKEFLKTHESSFSNRPVQTVAVEALTYGFQDFFFAPYGPYWKFMKKLCMSELLGSRMLEQLLPVRQEENKRFIQRVLEKGVAGEAVDFGGELMTLSNNIVSRMAVSRTSTENEKDVEEMRKLVADAAELVGKFNISDSIWFLKRFDLQGFNMRLNETRDRFDAVLDRIIKRREEERRNNNQTGGTRPFKDMLDVLLDIFEDESSEMKLNKDKIKAFILDIFVAGTDTSSLTIEWAMAELMNHPHVLEKARLEIDAVVGKSRIVEESDIKNLPYLQAIVKETFRLHPAGPLLFRESSRSVVVCGYNIPANTRLFINVWA…
Phaseolus vulgaris v1.0	Phvul.002G126200.1	PvuCYP93A59	ATGGATGATATTGAAGGTTACATACCTATATTCCTTATTTTCCTAGCCTCAATAGTATTGCTTCAAGCCATATTCAAAACTGCAAAATTTCGCCTTCCTCCTAGTCCTTTGGCTTTACCAGTTATTGGACACTTCCACTTGTTAAAGCCACCACTTCATAGATCTTTTCAGAAGCTCTCAAATCGTTATGGACCATTGATTCACCTCTACCTTGGCTCCACTCCCATTGTTGTTGTTTCCTCACCAGAAATTGCCCAAGAGATCTTCAAAACACATGAACTTTCTTTCTCCAACAGACCAGCAAATGTTGCTATTAACCATCTCACTTATAACTCGTCTGATCTAGGGTTTTCCCCTTATGGACCCTACTGGAAGTTCATGAAGAAGCTTTGCATGTCA…		MDDIEGYIPIFLIFLASIVLLQAIFKTAKFRLPPSPLALPVIGHFHLLKPPLHRSFQKLSNRYGPLIHLYLGSTPIVVVSSPEIAQEIFKTHELSFSNRPANVAINHLTYNSSDLGFSPYGPYWKFMKKLCMSELLNGRMLDQLLPIRREEINRFVVMMKMKGEACEGVNVGDELLKLTNGIVMRMAIGKSCFNIDGEAHKVTERVKECSKVSGMFNLADYFWFCRELDLQGIGKRMKEARERFDTIIESIIREHEEARNKFTKKDAPKDVLDALLSIYEDQSSEVKITRDNIKAFLVDIFTGGTDTTAVTLEWSLAELINHPTVMEKARKEIECIIGKDRMVMELDIGNLPYLQAIVKETLRLHPPSPFVLRESTKNCTIAEYDIPAKTQVFTNLWAI…
Phaseolus vulgaris v1.0	Phvul.007G257300.1	PvuCYP93A60	ATGGCAAATTTTGGTGACTATTTTTTGTTGCTTCTCTTGTGGCTAGCCTCAAGTTTGTTGTTAGATGTAATCCTCAAAAAGTTTGGTATAAAGAGACTCCTACCACCAAGTCCTAGAGCCCTCCCTGTAATAGGACACCTCTACCTCCTCACCAAGCTGCCCCACCAAGCATTTCACACCATTTCATCTCGCTATGGCCCTTTGGTCTACCTCTTGTTTGGTTCCAAGCCTTGTGTTCTTGTTTCATCGCCTGAAATGGCAAGCCAATGTCTCAAAACCAACGAAACATGTTTCCTAGACCGACCCAAAAGAACAAATTTGGACTACATCACCTACGGTTCTTCAGATTTTGTGCTGGCACCCTATGGACCTTATTGGAGGTTCATGAAAAAGGTTTGC…		MANFGDYFLLLLLWLASSLLLDVILKKFGIKRLLPPSPRALPVIGHLYLLTKLPHQAFHTISSRYGPLVYLLFGSKPCVLVSSPEMASQCLKTNETCFLDRPKRTNLDYITYGSSDFVLAPYGPYWRFMKKVCMTELLGARMLQQHLPIRAEETRLFLNSMMQKAGLREEVNVGKELAMLTNNIITRMALRRRCCDVEGEGHQLIELVKEMTELGGKFNLGDMLWFVKKLDLQGFGKKLERVRSRYDAIMEKIIKEHEDARRKKKENSGDGDETVKDLLDILLDIYADENSEIRLTRENIKAFIMNMFGAGTETSATTIEWGLAELIKHPEMMRKAREEIESVVGNDRLVEESDIPNLPYVHSIVKETMRLHPTGPLIVRQSTQDCNVKGYDIPAKSTL…
Phaseolus vulgaris v1.0	Phvul.007G257400.1	PvuCYP93A61	ATGGCTGATTTTGGTGACTATTTTTTGTTGCTTCTCTTGTGGCTAGTCTCAATATTCTTGTTAGAGGCAATTCTCAAAAAGTTTGGTATAAAGAGATGTCTACCACCAAGTCCTAGAGCCCTACCTGTAATAGGACACCTCTACCTCCTCACCAAGCTGCCCCACCAAGCATTTCACACCATCTCATCTCGCTATGGTCCTTTCGTCTTCCTTTGGTTTGGTTCCAAGCCTTGTCTTCTTGTTTCATCGCCTGAAATGGCAAGTCAATGCCTCAAAACCAACGAAACATGCTTCCTAAACCGATCCAAGAAAACAAATTTGGACTACATCACATACGGTTCTTCAGATTTAGTGATGGCACCCTATGGACCTTATTGGAGGTTCATGAAAAAGGTTTGC…		MADFGDYFLLLLLWLVSIFLLEAILKKFGIKRCLPPSPRALPVIGHLYLLTKLPHQAFHTISSRYGPFVFLWFGSKPCLLVSSPEMASQCLKTNETCFLNRSKKTNLDYITYGSSDLVMAPYGPYWRFMKKVCMTELLGGRMLHQHLPIRAEETRLFLNSMMQKAGLREEVNIGKELAMLTNNIITRMALRRRCCDVEGEGHQLIELVKEMTELGGKFNLGDMLWFVKKLDLQGFGKKLERVRSKYDAIIEKIIKEHEDARRKKKENNGNGDETVKDLLDILLDIYADENSEIRLTRENIKAFILNIFGAGTETTAATIEWGLVELIKHPEMMIKAREEIESVVGNDRLVKESDIPNLPYVHSIVKETMRLHPLGPVIVRQSTVDCNIKGYDIPAKTTL…
Phaseolus vulgaris v1.0	Phvul.007G257500.1	PvuCYP93A62	ATGAAACATTTTCCAACGTTGTTGCAAAACTTGCACGCACTCATGGCGGAAATAGAAGCTCAAACCTATGTCAAACTCTTCCTCATCTGGCTACTCTTCACCATCGTGGTTCGCGCCATACTCTGGTCCACGCGCCGCCATCCCCGCCGTCCACCAGGGCCACCCTCTCTCCCCGTCATCGGCCACCTCCACCTGATCTCCGCCCTCCCTCACCAGTCATTCCACGCGCTGGCCGCACGCCACGGCCCCATCATGCAGATCTTCCTGGGGTCCGTTTCGTGCGTGGTGGTTTCGTGCCCGGAAATGGCGAAAGAGTTCTTGAAAGCACACGAGAGAAGCTTCTCGAACCGGTTCGTAAGTGCGGCAGTTCACCAGCTGTCGTACGAGTCGAAAGGATTC…		MKHFPTLLQNLHALMAEIEAQTYVKLFLIWLLFTIVVRAILWSTRRHPRRPPGPPSLPVIGHLHLISALPHQSFHALAARHGPIMQIFLGSVSCVVVSCPEMAKEFLKAHERSFSNRFVSAAVHQLSYESKGFLFARYGRFWKFMKKICMSELLGSRTLDHFRHVREQETRRFLRMLRRKGEAREAVDLGGELLTLMNSIISRMVLGRRWCESEGEVEEVRKMVKDTAEVAGEFNVGDFVWLCKGLDLQRMKKRVGKIHERFDGMMERVIREHVEERQRRKERGEEEEKVRDLLHILWDIHEDESREMKLTRENVKAFILDIFMAGTDTSSITMEWALAELLRNPNVMEKAREEIDSVTGNSSRLIEESDVVNLPYMRAIVKETLRLHPTSPMIGRESS…
Lotus japonicus v2.5	chr1.CM0318.690.r2.d	LjaCYP93A107	ATGGCTGATTACCAAACATACATCCTACTTTTCCTAACATGGCTAGTGTCCTTAATTGTAGTCCGAACCATCTTCACCAGAAAACAGAATAAGCTTCATCTCCCACCAAGCCCCTTCGCCTTACCGATCATCGGACACCTCCACCTCCTTGCTCCAATCCCCCACCAAGCCCTCCACAAGCTCTCAACCCGCCACGGGCCCATAATGCACCTCTTCCTCGGCTCCGTCCCTTGTGTCGTTGCCTCCACCGCAGAATCTGCCAGAGAGTTTCTTAAGACCCAAGAAACCCACTTCTCCAACCGCCCGCAAAGCTCGGCCGTCCATTACCTCACATATGGCTCCCAGGACTTCTCCTTTGCCCCGTATGGACCTTACTGGAAATTCATGAAGAAAATCTGC…		MADYQTYILLFLTWLVSLIVVRTIFTRKQNKLHLPPSPFALPIIGHLHLLAPIPHQALHKLSTRHGPIMHLFLGSVPCVVASTAESAREFLKTQETHFSNRPQSSAVHYLTYGSQDFSFAPYGPYWKFMKKICMSELLGGHTLTELLPVRRQETTRLMRVFLKKGKSGEDVDVGGELLRLSNSVVSRMIMSQSCEDDGEAEKVRKMVQDTVFLTGKFNVSDFIWFLKNWDLQGFGKGLKEIRDRFDAMMERVIKEHQEERRKRKELGGGDGRIKDLLDILLDIHEDESSEIKLTMENIKAFILDIYMAGTDTSALTTEWALAELINHPHMMERARQEINSVVGNSRIVEESDIVHLPYLQAIVKETLRIHPTGPLIVRESSESCTIWGYEIPAKTQLFV…
Lotus japonicus v2.5	chr6.CM0314.520.r2.d	LjaCYP93A108	ATGCCAATCTTTCTGATTTTTCTAGCCTCGCTGATATTTCTCAAATCTATATTTCCCGGAGCTACCTCAAAATTTCGCCTTCCACCTAGTCCAATAGCCTTACCAGTTATAGGACACTTCCACTTATTAAAACCATCCCTTCACAAAGCCATTCAAAACATCTCAAATCGCCATGGACCCTTAATTCACCTCTATCTTGGTTCCAATCCCATGGTCTTTGTTTCCTCTGCAGAAATTGCCAGAGAGATTTTAAAAGCCAATGAATTATCTTTCTCCAACCGTTCCGCGAACGTCGCAATCCGTTACCTCACTTATGATGCGTCCGATTTAGGATTTGCCCCTTATGGTACCTACTGGAAGTTCATGAAAAAACTCTGCATGTCAGAGCTTCTGAACGGG…		MPIFLIFLASLIFLKSIFPGATSKFRLPPSPIALPVIGHFHLLKPSLHKAIQNISNRHGPLIHLYLGSNPMVFVSSAEIAREILKANELSFSNRSANVAIRYLTYDASDLGFAPYGTYWKFMKKLCMSELLNGKMLDQLYPIRQEEIKRFLQVIQKKSQAYTAVNVADELLKLTNSIVMRMAISKSCFDVDDEAEKVTERVKESAKLSGKFNLADHFWFFKGLDVQGMGKRLKEVRDRFDNMMESIIQEHEETRNKSSRKDVSRDVLDALLSIYEDKSSEVKITRDNIKAFLVVMKSSSLKHFFKHHVGEATIL*
Cajanus cajan	C.cajan_06022	CcaCYP93A109	ATGGCCGAAACGCAAGACTACCTCCAACTTTTCCTCCTCTGCCTACTCTCCACCATCGCGGTGGGAACCATCATATCGAAAACGCTGCGAAAACGACGTCGTCCACCGGGGCCACAGTCCCTCCCAATCATAGGTCACCTGCACCTGATCTCCGCCCTGCCACACCAGTCCTTCCACGCGCTCGCCACGCGCTACGGCCCCCTCATGCAGCTCTTTCTGGGGTCGGTCCCGTGCGTCGTCGTTTCGTCCCCGGAAGTGGCGAAAGAGTTCCTGAAGACGCACGAGGCCCGGTTCTCGAACCGGTTCGTGAGCGCCGCGGTGCACCAGTTGTCGTACGGCTCCAAGGGGTTCCTCTTCGCGCCCTACGGAACCTTCTGGAGGTTCGCCAAGAGAATTTGC…		MAETQDYLQLFLLCLLSTIAVGTIISKTLRKRRRPPGPQSLPIIGHLHLISALPHQSFHALATRYGPLMQLFLGSVPCVVVSSPEVAKEFLKTHEARFSNRFVSAAVHQLSYGSKGFLFAPYGTFWRFAKRICMSQLLGARTLGQLRHVREQETLRFLRVMKAKGEAREAVDVGGELLTLTNNVITRMVLGRTCCESDADVEGVRKMVEDTAELAGLFNVADFVWFCKGLDLHGMNKRVGEIMNRFDGIMERVIREHEEERKRKKEEGVEGEKIGDLLDILLDIHEDESNEMKFTRDNVKAFIMDIFMAGTDTSAITMEWAISELINNPQVMEKARQEIDSATENNSRLIQESDLGNLPYLRAIVKETLRIHPTSPFIGRESSENSNVCGYDIPAKTVL…
Cajanus cajan	C.cajan_09526	CcaCYP93A110	ATGGATGCTTCTGGTGCTACTGTTTTGTGTTTCATCTTCTTTTCCACCATAGCTTTTCTTATCTTCAAGTCCCTTATCACACGAAGCAAAAATAGTAGAACCCCACCAAGTCCACCAAGACTTCCCATCATTGGCCACCTTCACCTTCTAGGCTCAGTCATACCAAAATCATTCCAAGCTCTCGCTCTTCGCCATGGCCCTCTCATTCAGCTTCGCTTAGGTGCCTCAACATGCGTGGTTGTCTCCAACGCGCAAGTTGCCAAAGAAGTGATGAAAACTCACGAACTCAATTTCTGTAACCGACCCCAGTTTGGATCCTCCGAGTACTTCTTATACAAAGGTTCTGGTTTCGTCACTGCCCCTTATGGCCCTTATTGGCGCTTCATTAAAAAACTTTGC…		MDASGATVLCFIFFSTIAFLIFKSLITRSKNSRTPPSPPRLPIIGHLHLLGSVIPKSFQALALRHGPLIQLRLGASTCVVVSNAQVAKEVMKTHELNFCNRPQFGSSEYFLYKGSGFVTAPYGPYWRFIKKLCVTQLLSSSQLARFVHIREHEIEKLLKSLMVCSTEGRASDLSFDLTALTNSILCRMAMSTTCFDQVNDAEEILGLVREFLHVGAMLSMEAHGGHTCDMMDILLQVCKDPNTEVRLTRNDIKAFFLDIFLAGTDTSSAALQWTMAEILNNPGVLKKVRAEIDAVVGTSRLVNESDVPNLRYLQSVVKEALRLHPTAPFVLRQSSEDCSINGYDVKGQTRTLINVYAIMRDPQVWVNAEEFKPERFLEETDGSGGQRVIAMDGGDFRYL…
Cajanus cajan	C.cajan_09527	CcaCYP93A112	ATGGCTTTTCCAATCTTGCTCTTGTGTTTGGTCTCCACCATTGTGTTTTTTGCATCCATACTGTGGAGAAAACAAAACAAGACGCTTCTTCCACCAGGTCCCATAGCCCTTCCCATCATTGGCCACCTCCACCTTCTCTCCCCAACACCACACCAAGATTTTCACAAGCTCTCAATCCGCTACGGACCCATCATACACCTTTTCCTTGGCTCAGTCCCTTGTGTCGTAGCTTCCACCGCAGAAGCCGCCAAAGAGTTCCTCAAAACTCACGAAACCTCCTTCTCCAACCGCCCCGCTAAAACCGTCGCCGTTGAGGCCTTAACCTACGGTTTCCAAGACTTCTTGTTCGCACCCTACGGACCCTATTGGAAGTTCCTGAAGAAACTCTGCATGTCTGAA…		MAFPILLLCLVSTIVFFASILWRKQNKTLLPPGPIALPIIGHLHLLSPTPHQDFHKLSIRYGPIIHLFLGSVPCVVASTAEAAKEFLKTHETSFSNRPAKTVAVEALTYGFQDFLFAPYGPYWKFLKKLCMSELLGGHMLDMFLPVRMQETRRFIKRVLHKAGEAVDFGGEFMTLSNNIVSRMSVSQTSSENEDEDEEMRKLVADTAELVGKFNISDFIWKNKETGGTRRFKDMLDVLLDIFEDENSEMKLDKDNIKAFIMDILVAGTDTSAVTMEWGMAELINNPRVLEKARHEIDSVIGKSRIVEESDIVNLPYLQAIVKETLRIHPAGPLIFRESSRSDVVCGYNIPAKTRLFINVWAIGRDPIHWESPLEFRPERFIENGPSQSQLDVRGQHYHL…
Cajanus cajan	C.cajan_28898	CcaCYP93A113	ATGGACGATATTCAAGGATACATACAAATATTCCTTGTTTGCATAGCTTCAACAATATTGCTCCGAGCCGTATTCAAAGCTTCAAAATACCACCTTCCACCTAGTCCATTGGCCTTACCAGTGATTGGACACTTCTACTTGCTAAAACCACCCCTTCACAGATCTTTCCAGAAGCTCTCAAATCGCTATGGACCCTTGATTCATCTCTACCTCGGCTCCACTCCCATTGTAGTTGTTTCCTCAGCAGAAACAGCCAAAGAGATCTTCAAAACCCACGAACTTTCCTTCTCCAACCGACCAGCAAATGCTGCCATAAGCTACCTCACTTATGACTCATCCGATCTAGGGTTTTCCCCTTATGGAACCTTCTGGAAGTTCATGAAGAAGCTTTGCATGTCA…		MDDIQGYIQIFLVCIASTILLRAVFKASKYHLPPSPLALPVIGHFYLLKPPLHRSFQKLSNRYGPLIHLYLGSTPIVVVSSAETAKEIFKTHELSFSNRPANAAISYLTYDSSDLGFSPYGTFWKFMKKLCMSELLNGRMLDQLLPIRQEEINRFVAMIKKKGEVCQGVNVGEELLKLTNSIVMRMAVSKSCLNTDDEAHKVVERVKECAVLSGRFNLADYFWFCKGLDLQGIGKRLKEVRGRFDTMMEIIIREHEDSRDKSSVAKDVLDALLSISEDQSSEVKITRDNIKAFLVDMFTGGTDTTAVTLEWSLAELINHPTVMEKARKEIDSIIGKDRIVTELDIENLPYLQAIVKETLRLHPPSPFVLRESTKDCIIVGYDIPAKTQVFTNVWAIGRD…
Cajanus cajan	C.cajan_33039	CcaCYP93A30	ATGGCTAACTTTGGTGAGTATTTTGTCTTCCTTCTCATTTGGCTTGCTTCAATCTTCTTGTTACGTGTAATCATCACTAGGTTTCGCATCAAGGCACGCCTACCACCAAGTCCTAGAGCCCTACCTGTTTTAGGGCACCTCTACCTCCTCACCAAGCTCCCTCACCAAGCATTTCACAACATCTCATCCCGTTATGGCCCTTTGGTCTACCTCGTGTTCGGTTCCAAACCTTGTGTTCTTGTTTCATCACCCGAAATGGCGCGACAATGCCTCAAAACCCATGAAACATGTTTCCTTAACCGACCCAAAAGGACCAACGTGGACTACATCACGTACGATTCTTCAGATTTTGTGTTGGCACCCTATGGACCTTATTGGAGGTTCATGAAAAGGCTTTGC…		MANFGEYFVFLLIWLASIFLLRVIITRFRIKARLPPSPRALPVLGHLYLLTKLPHQAFHNISSRYGPLVYLVFGSKPCVLVSSPEMARQCLKTHETCFLNRPKRTNVDYITYDSSDFVLAPYGPYWRFMKRLCMSELLGGRMLHQHLPIREEETRLFLKSMMQKASLKEEVNIGKELCMLTNNIITRMALRRRCCDVEGEGHQLIELVKEMTELGGKFNLGDMLWFVKKLDLQGFGKKLESVRSRYDVIMERIMKEHEDARRRKKEMGGDGDEVRDLLDVLLDIYNDESSEIRLTRENIKAFIMVQRGKTSFISLSLTSNEYNMFGAGTETSATTIEWGLAELINHPNIMLKARQEIDSVVGNTRLVEESDIPNLPYVQSIVKETMRLHPTGPLIGRQT…
Cicer arietinum v1.0	Ca_07287	CarCYP93A114	ATGGCTGATTACCAAGGTTACTTCTTACTTTTCATCATATGGCTAATATCCACAATTTTGGTACGAACCATACTTAAAAGAAAACAGAACAAATCTAATTTACCTCCAACTCCATTATCCTTACCCATCATTGGACACCTTCACCTTCTTGGTCCAATCCCTCACCAAGCATTTCACAAACTCTCCACACGCTATGGACCAATAATGCATCTTTTCCTTGGTTCTGTCCCTTGTGTCATAGCTTCCACACCAGAAACAGCAAAAGAGTTTCTTAAAACTCAAGAAACCTATTTTTCAAACCGTCCTCAAAGTTCATCTGTTGATTATTTAACATATGGCTCACAAGACTTTTCCTTTGCCCCTTATGGACCTTATTGGAAATTCATGAAGAAAATATGC…		MADYQGYFLLFIIWLISTILVRTILKRKQNKSNLPPTPLSLPIIGHLHLLGPIPHQAFHKLSTRYGPIMHLFLGSVPCVIASTPETAKEFLKTQETYFSNRPQSSSVDYLTYGSQDFSFAPYGPYWKFMKKICMSQLLGGHTLTQLLPLRRQETTRFVKLLIKKGEENEAVDVGGVLMTLSNNVVSRMIMSRSFCESDGEADAVRKLVQDTAHLTGKFNVSDFIWFFKNWDVQGFGKRLKEIRDRFDSMMERMIKEHQEERRRRKEVGGGDGQIKDLLDILLDILEDESSEINLTMENIKAFILDIFMAGTDTSALTIEWALSELINNPLVMDKARQEINDVVGNNRIVEESDLINLPYLQALVKETLRIHPTGPLIVRESSENCSILGYEIQAKTQLF…
Cicer arietinum v1.0	Ca_14219	CarCYP93A115	ATGAAGAGGAAGTGTATGTCAGAGCTTCTTGGTGGAAGAATACTTGATCAGCTTCTTCCCGTGAGACAACAAGAGACTGTAAAGCTTCTGAGACTTTTGCAAAAGAAAGGGGAAGCAGGTGAGGCCGTTGATGTCGGCGGCGAGCTATTGACTCTAACCAATAGCATTATAACAAGGATGACAATGAGAACAAATTGTTCTGAGAATGATAATGATGTTGAAGAGATTAGGAAGATGGTGAAAGACACAGCAGAGATAGCTGGGAAATTTAATGTCTCGGATTTTATTTGGTTTTGTAAGAATTTATATTTTCAAGGAATGAATAAAAGGCTTAAAGGGATTATGGAAAAGTTTGATACAATGATGGAGAGAGTGATAAAGGAGCATCAAGAAAAAAGG…		MKRKCMSELLGGRILDQLLPVRQQETVKLLRLLQKKGEAGEAVDVGGELLTLTNSIITRMTMRTNCSENDNDVEEIRKMVKDTAEIAGKFNVSDFIWFCKNLYFQGMNKRLKGIMEKFDTMMERVIKEHQEKRKKKSEDDDVRDILDILLEIHEDESLTRNNIKAFILDIFMAGTDTSAITMEWALAELINNPNVMEKARQEIDSVTKKKSRLIQESDLPNLPYLQAIIKETLRIHPTVPIIERESSENCNIYGYEIPAKAILFVNLWSMGRDPNIWEKPLEFKPERFINEYNKFDVWGKNYQLISFGTGRRVCPGASFALQFVPTNLATMIQCFEWKLDNETGIANMEEKSGLTLPRAHPLTCFPIPRFRSIPSSE*
Linum usitatissimum v1.0	Lus10027798	LusCYP93A116	ATGGCGATGGGGGCGAGATGCTCCGGCGACGGCGGCGGGGAGGCGGAGGAGGTGAGGGAGGTGATTCGGGAGACGGCGGAGCTGACGGGGAAATTCAATTTGGCGGATTTTGTGTGGTTCTGTAAAGGAATGGATCTTCAGGGGTTTGGGAAGAGGATGAAGGTTGTGAGGGATAAATTTGATTCGATGATGGAGAGGATCATTAACGAGCATGAGGAAGAAAGGAAGAAGAAGAAGAATAACAACAACAATGGTGGTTCAGAGGAGGACGATGACCAAGTGAAGGATTTGCTTGACGTGCTGCTGGATATTTCTGAGGATCAAAGTTCAGAAATCAGATTGAGCCGTGAGAATATCAAGGCTTTCATCCTTGATATATTTGCGGCGGGAACAGACACG…		MAMGARCSGDGGGEAEEVREVIRETAELTGKFNLADFVWFCKGMDLQGFGKRMKVVRDKFDSMMERIINEHEEERKKKKNNNNNGGSEEDDDQVKDLLDVLLDISEDQSSEIRLSRENIKAFILDIFAAGTDTSAITTEWALAELINHPKILTKAQHEIDSVVGKSRMVRESDIPNLPYLQAMVKETLRLHPTAPLIVRESSEDCDVQDYNIPARTRLFVNVWAISRDPNYWDDPLEFKPERFVDGKGSQVEVRGQHFEMLPFGSGRRGCPGTTLALQMVQTMLAVMVQCFEWKVDGDVVDMEEGIGLTLPKANPLVCVPMARLHPFPTNGLDT*
Linum usitatissimum v1.0	Lus10035502	LusCYP93A117	ATGACGCTACCCGATTCGCAATTCTACTGGCCTGCAACAATCGGCTTACTCTGCATCACACTACTCATCCTCAAAACACTATTCGCCGGAACCCGACCCGATTCCCCGCCGCCGCGTCCATTCGCGCTTCCGATCATCGGCCATCTCCACCTTCTGGCTCCGATCCCACACCAAGCCCTCCACAAGCTCGCCCTCCGACACGGCCCGCTCTTTAGAATCTCCCTCGGCTCCGTCCCCTGCGTCGTCGCCTCCTCGCCGGAGACGGCCAAGGCGTTCCTCAAGACCCACGAGTCCTCCTTCTCGGATCGACCGGGATCCGTCGCAGTCGACTACCTCACTTACGGATCCGCCGACTTCTCGTTCGCCCCACACGGGCCGTATTGGAAATTCATGAAGAAG…		MTLPDSQFYWPATIGLLCITLLILKTLFAGTRPDSPPPRPFALPIIGHLHLLAPIPHQALHKLALRHGPLFRISLGSVPCVVASSPETAKAFLKTHESSFSDRPGSVAVDYLTYGSADFSFAPHGPYWKFMKKLCMSELLGGRTLDRMANLRREEIESFCLGILKRAGERVEVGGELIRVTNNVISRMAMGARCSGDGGGEAEEVRDVIRETAELTGKFNLADFVWFCKGLDLQGFGKRMEVVREKFDSMMERIINEHEEERKKTKKNNNGGFEDDDDQVKDLLDVLLDISEDQSSEIRLTRENIKAFILDIFAAGTDTSAITTEWALAELINHPEMLTKAQHEIDLVVGKSRMVKESDIPNLPYLQAVVKETLRLHPTGPLIVRESSEDCEVQGYNIP…
Manihot esculenta v4.1	cassava4.1_022643m	MesCYP93A118	ATGGCTGATTTCCAAGAATACATGATCCTTCTTCTCATATGGCTAGTTTCCATGATTGTGGTCAGAGTAATACTAAACAAAATTCGACCCAAATCTCATCTTCCACCAAGTCCACCAGCCCTACCAATCCTTGGACACCTCCATCTACTTGGTCCAATACCTCATCAAGCTTTCCACAAGCTTTCAACCAAGTATGGGCCATTAATTCATCTACTCCTTGGTTCTGTCCCTTGTGTTGTTGCTTCCTCCCCTGAGATGGCAAAAGAGTTCCTCAAAACACATGAAACTTCATTCTCTGATCGTCCAATAGCGTTTGCAGTAGATTACCTCACATATGGCTCTGCTGATTTTTCCTTTGCCCCTTATGGACCTTATTGGAAGTTCATGAAGAAAATTTGT…		MADFQEYMILLLIWLVSMIVVRVILNKIRPKSHLPPSPPALPILGHLHLLGPIPHQAFHKLSTKYGPLIHLLLGSVPCVVASSPEMAKEFLKTHETSFSDRPIAFAVDYLTYGSADFSFAPYGPYWKFMKKICVSELLGGRILDQFLPVRQEEIRIFLHLILKKANAGESVDLGRQLLRATNNIISRMMMSQRCSDSEDEADEVRQLVQETVELTGKFNLSDYIWLCKNLDLQGFNKRLKEVRDNFDKMLERIIKEHQEGRKIKKETGEDTIKDLLDILLDISEDANSEMKLTRENIKAFILDIFAAGTDTSAITTEWALSELINHPEIMKKAREEIDSAIGKSRLVEESDIPNLPYLQAIVKETLRLHPTGPLIVRESTKNCSINGYEIPARTRLFVN…
Manihot esculenta v4.1	cassava4.1_027206m	MesCYP93A119	ATGGTGGACATCCAAGACTACACCATTTTATTTGTTGTCTGGTTAATTTCAACCCTCCTGGTTCGAGCCATCTTCTTGAAAACACGAGCAAAGCCACAACTCCCGCCTGGTCCTACAGCACTTCCGATCATAGGACACCTTCACCTTCTCCGACCGATTCCTCACCAGGCACTGCACAGGCTCTCACAACGCTATGGTCCCTTGTTTCACCTTTACTTTGGTTCTGTTCCTTGTGTTGTTGTTTCTTCTCCTGAAATGGCAAAAGAGTTCCTGAAAACTCATGAAATGTCCTTCTGCAATCGCCCATCAACTGTAGCAGTTCGATGCTTGACTTATGGAGCATCAGGCTTCAGTTTTGCTCCATATGGTCCTCACTGGAAATTCATGAAGCAAATATCC…		MVDIQDYTILFVVWLISTLLVRAIFLKTRAKPQLPPGPTALPIIGHLHLLRPIPHQALHRLSQRYGPLFHLYFGSVPCVVVSSPEMAKEFLKTHEMSFCNRPSTVAVRCLTYGASGFSFAPYGPHWKFMKQISMTQLLGGQTLDRFLDVRLEEIEIFLKLMLQKGYEGKEVNLGEELMTLSNNIISRMTMSKRCSTTDDEAGDVRKLIEEVGVITGKFNFQDYIWFCKNIDIQGFGRRIKKVQVRLDSMMESILKEHEEARMMKKKKKKDNKTENGESNDDFKQDLVDILLDIIENENSEMKLSRKSVKAFILEMFTTGTGTSAGVIQWAMAELINHPNIFKKAREEIDSVVGKNRNLKESDTPSLAYLQAIVKETLRLHPSGPLFTRESTQDCNIGGY…
Manihot esculenta v4.1	cassava4.1_029231m	MesCYP93A120	ATGGCAGATATGCAAGATTATGCCATACAAATCCTTACCTTCCTAGCTTCCTTCTTCTTTATCCTGATCATCTTTGTCAAATGTAGGAACAAAGTTCGCCTTCCACCGAGCCCCAGAGCCCTGCCAATTATAGGACATATGCACCTTCTGGGTCCTATTCCTCACCAAGCTTTTCACAAACTCTCAATCCGTTATGGACCTTTAGTTTACTTCTTCATTGGCTCAAAGCCTTGTGTTCTTGCTTCCACACCTGAAATGGCAAAAGAGATACTTAAAAACAATGAATCTAATTTCATGAACCGCCCTAAAGTAGCAAACCTTGATTATCTTACCTATGGCTCAGCTGATTTTGCTACCATACCTTATGGACCCCATTGGAAGTTCATGAAGAAACTTTGC…		MADMQDYAIQILTFLASFFFILIIFVKCRNKVRLPPSPRALPIIGHMHLLGPIPHQAFHKLSIRYGPLVYFFIGSKPCVLASTPEMAKEILKNNESNFMNRPKVANLDYLTYGSADFATIPYGPHWKFMKKLCMTELLGSRTLDQFLPIRQEETKRFLKLVLKKAEAKEAVNVGGELMRLTNNIISRMLLRTRCSDKKDEADEVRKLVKELNELGAKFNLSDTIWFCKNFDLQGFEKRLKDARDRYNNMMERIMKEHEDARKKKKEVGEEGDTVKDLLDLLLDIYEDENAERRLTRENIKAFIMNIFGAGTDTSSITVEWGLAELINHPHVMEKAKLEIDSVVGKTRLVQESDIPNLPYLQAIVKEILRLHPTGPLIVRESSEDCVIAGYTIPAKTRLF…
Ricinus communis v0.1	30152.m002423	RcoCYP93A54	ATGGAGGAGTCCTCAACAATCCTTCCATCTATAGACTACGCACAGTATCAAACCGAGAAAATGGCAGAACTCCAAGAATATACCACTCTCTTTCTTTTATGGCTGGTCTCAACGTTCCTGGTCCGAGCCATCTTATCAAGAACACGTTCAAAAGCTCAACTCCCACCTAGTCCTATATCACTTCCGATCATAGGACACCTTCATCTTCTCCGGCCGATCCCTCACCAGGCACTTCATAAGTTATCACAACGATTTGGCCCCTTGTTTCACCTGTCTTTTGGTTCTGTTCCTTGTGTTGTTGCCTCTTCTCCTGAAATGGCAAAAGAGTTCCTTAAAACTCATGAAATGTCCTTCTGCAATCGCCCATCAACCGCGGCGGTTCGCTGCTTGACTTATGGC…		MEESSTILPSIDYAQYQTEKMAELQEYTTLFLLWLVSTFLVRAILSRTRSKAQLPPSPISLPIIGHLHLLRPIPHQALHKLSQRFGPLFHLSFGSVPCVVASSPEMAKEFLKTHEMSFCNRPSTAAVRCLTYGASGFSFAPYGPYWKFMKQICMTQLLGGRTLDSFSDVRRQEIGTFLKLMLQKSQQGKEVNLGEELMNFANNIISRMTMGKRCSTTDDEAGDVRKLIEEVGVLTGEFNFQDYIWFCKNIDIQGFGKRLKKVQVRLDAMMESVLKEHEEVRTMMKNSELGDNDAKKDLVDILLDIMEDESSEMRLSRESVKAFILEMFTTGTGTSAGVIQWAMAELINHPNIFKKAREEIDSVVGKNRLIKELDIQSLPYLQAIIKETLRLHPSGPLFT…
Populus trichocarpa v3.0	Potri.006G058200.1	PtrCYP93A6	ATGGCTGATATTCAAGACTATGCAATACCATTCCTTATCTTCCTAGCTTCCATCCTGCTGGTGCAAATCATCCTGGCCAAGATCCGTCGCAACGCTGGCCTCCCTCCAAGCCCCAGAGCCCTGCCAATCATTGGACATATGCACCTCCTTAGTCGTATCCCTCACCAAGCCTTCCACAAGCTATCAGCCCGCTATGGACCTTTGGTTTACTTCTTCATTGGCTCAAAACCTTGTCTTCTTGCTTCTACCCCAGAGGTTGCAAAAGAAATCCTCAAAATCAATGAAGCTAATTTCTTGAACCGTCCTAAAGTAGCCAACCTTGATTACCTTACATATGGCTCAGCTGATTTTGCTACCATATATTATGGACCTCATTGGAAGTTCATGAAGAAACTTTGC…		MADIQDYAIPFLIFLASILLVQIILAKIRRNAGLPPSPRALPIIGHMHLLSRIPHQAFHKLSARYGPLVYFFIGSKPCLLASTPEVAKEILKINEANFLNRPKVANLDYLTYGSADFATIYYGPHWKFMKKLCMTEILGSRTLTQFLPIRCEERERFLKLVLKRAEAKEAVDVGGELMRLTNNIISRMLLRTRCSDTENEADDVRELVKELNTLGAKFNLSDSIWFCKNFDLQGFDKRLKDARDRYDAMMERIMKEHEDARKRKKETGDEDDTVKDLLDILLDIYEDENAEKRLTRENIKAFIMNIFGAGTDTSSITVEWGLAELINHPIMMEKVRQEIDSVVGRSRLVQESDIANLPYLQAIVKETLRLHPTGPLIVRESLEDCTIAGYRIPAKTRLF…
Populus trichocarpa v3.0	Potri.016G049800.1	PtrCYP93A4	ATGGCTGATATCCAAGGCTATATCATACTTTTCCTATTATGGCTACTCTCCACCATTTTGGTCAGAGCAATACTAAACAAGACTCGAGCCAAACCTCGCCTTCCACCGAGCCCATTGGCCTTACCAATCATTGGACACCTCCATCTCCTTGCCCCAATACCCCACCAAGCTCTTCATAAGCTCTCAACCCGGTATGGACCATTGATTCATTTATTCCTTGGTTCTGTCCCTTGTGTTGTTGCTTCTACACCTGAGACTGCAAAGGAGTTCCTCAAAACTCATGAAAATTCTTTCTGCGATCGTCCTAAGTCAACCGCAGTCGATTTTCTAACATATGGATCAGCTGATTTCTCATTTGCCCCTTATGGACCTTACTGGAAATTCATGAAGAAAATTTGT…		MADIQGYIILFLLWLLSTILVRAILNKTRAKPRLPPSPLALPIIGHLHLLAPIPHQALHKLSTRYGPLIHLFLGSVPCVVASTPETAKEFLKTHENSFCDRPKSTAVDFLTYGSADFSFAPYGPYWKFMKKICMTELLGGRMLDQLLPVKHEEIRQFLQFLLKKANARESIDVGSQLIRLTNNVISRMAMSQRCSDNDDEADEVRNLVHEVADLTGKFNLSDFIWFCKNLDLQGFGKRLKEVRKRFDTMTERIIMEHEEARKKKKETGEGDPVKDLLDILLDISEDDSSEMKLTRENIKAFILDIFAAGTDTSAVTMEWALAELINNPNILERAREEIDSVVGQSRLVQESDIANLPYVQAILKETLRLHPTGPIILRESSESCTINGYEIPARTRLFV…
Eucalyptus grandis v1.1	Eucgr.A02423.1	EgrCYP93A121	ATGGCCTTCTCACAAGACTACCTCATCCCCCTCGCCCTTTGTCTACTCTCCCTACTCTTGATTCGAGCCCTCCGCGCCAAAACTCGAACGGGGGGTCGCCTCCCACCGAGCCCGCGGTCCCTCCCCGTCATAGGCCATATGCACCTCTTGGCTCCGATCCCCCACCAAGCCCTGCACAAGATTTCCACCTCCCTCGGGCCCTTGTTCCTCATCTACATCGGCTCGAACCCTTGCGTGGTCGCCTCCTCGCCAGAAACCGCCCAGCAGATCCTTAAAACCCACGAGTCATCCTTCCTCAACCGCCCCAAGATGGCCAATGCCGACTACCTCACCTACGGCTCCTCCGACTTCACCTTCGCCCCGTACGGCCCCTACTGGAAGTTCATCAAGAAGCTCTGC…		MAFSQDYLIPLALCLLSLLLIRALRAKTRTGGRLPPSPRSLPVIGHMHLLAPIPHQALHKISTSLGPLFLIYIGSNPCVVASSPETAQQILKTHESSFLNRPKMANADYLTYGSSDFTFAPYGPYWKFIKKLCMTRLLGGPTLDHLLPVRSEEIGRFLKAMFEKAAKKQAVDVGMELMKLTNNVISRMALSRRCCDDEDEADEVRTLVKEMCELAGKFNLSEAIWFCKNLDVQGFGKRLKDVRERYDEMMERIIREHQEARGKGGERVKDLLDILLEIYEDESSEIRLTRENIKAFIMNVFGAGTDTSSTTIEWALSELINHPDVMEKAKQEIDSVVGRSRVVSELDVPNLPYLQAIVKETLRLHPTGPLVARLSTEDTVICGYDVPANTRILINVWAL…
Eucalyptus grandis v1.1	Eucgr.A02424.1	EgrCYP93A122	ATGGCTGACCTCCAAGGCTACATCCTCCTGTTCCTAGTGTGGGTAGGCTCTCTCACCCTAGTCCGAGCAGTGCTAAATCGATACCGAGCCCCCTCTTGTCTCCCTCCGAGCCCCTGGTCCATACCGATCCTCGGCCACCTCCACCTCCTGGCTCCAATCCCCCACCAAGCCCTCCACAAGCTCGCCAACCGCTTCGGACCCCTGATCCACATCTGGCTTGGGTCCGTCCCCTGCATCGTCGTCTCCTCCGCTGAGATGGCCAAGGAGTTCCTCAAGACCCATGAGGCCCACTTCTCCAACAGGCCTTATAGTGCCGCGGTTGACTTCCTCACTTACGGGTCACAGGACTTTTCATTCGCACCGTACGGGCCGTACTGGAAGTTCATGAAGAAGCTGTGC…		MADLQGYILLFLVWVGSLTLVRAVLNRYRAPSCLPPSPWSIPILGHLHLLAPIPHQALHKLANRFGPLIHIWLGSVPCIVVSSAEMAKEFLKTHEAHFSNRPYSAAVDFLTYGSQDFSFAPYGPYWKFMKKLCMSELLGGRTLDLLLPVRREEINRFIASMLKKAEVGEEVDVGAELVKVTNKVISRMTMNTRYSDNDNEAGEVRKVVQEVAELTGKFNLSDFIWFCKNLDLQGFGKRLKKVRDRFDAMTERIIEEHEEARKIRRERGGSETARDLLDILLDISEDESSEMRLTRGNIKAFILDIFAAGTDTSAITTEWALAELINHPEVLEKARQEIHNVVGNARLVQESDLPDLPTCKHSYEIPAKTRLFVNVYAIGRDPKHWEDPLEFRPERFLRE…
Eucalyptus grandis v1.1	Eucgr.I01315.1	EgrCYP93A123	ATGGCCCGTTGCTTTTATCTCTCCTTCGGCTCGTTTCCTTGTGTGGTAGCTTCTTCCCCCGAAACGGCAAAAGAGTTCGTCAAAACCCATGAAACTTCCTTCTCCAATCGCCCGTCGACCGTGGCTATCCGGTGCTTGACTTATGGAGCGGCCGACTTTAGCTTTGCTCCCTACGGGCGCTACTGGATGTTCATGAAGAAGATATGCATGACGGAACTTCTTGGTGGACGGACGCTAGACCACTTCCTTCCCGTTCGAGAGGAAGAAATGGAGACTTTCCTGAAGGGGACGCTACGGAAGAGCCAAGCCAATGAGGCGGTTGATGTAGGCCAAGAGCTCACGGCACTCGCAAATAACATAATCTCTAGAACGACGATAAGCAGGAGGTGTTCGGCGACT…		MARCFYLSFGSFPCVVASSPETAKEFVKTHETSFSNRPSTVAIRCLTYGAADFSFAPYGRYWMFMKKICMTELLGGRTLDHFLPVREEEMETFLKGTLRKSQANEAVDVGQELTALANNIISRTTISRRCSATSEEASEMRTLVDEVGGLSGKFNFQDYIWFCKNVDIQGIFKEHEEARNKNCDSSMRSKDLVNILLDIVKDEKAEMRLSRESIEAFILEMFTTGTGTSAGVTQWALAELINHPDILNKAREETDSTTGNKRLVKESDLPNLHFLQAIVKKTLRLHPSGPLFTRESTQHCKIGGYDIPASTRLIVNVWSIGRDPNYWENPMDFVPTRFINGSGRSQIDVRGRHYELLPFGSGRRSCPWTSLALRCFDWKVANGKENSVDMTEAAGIALL…
Citrus sinensis v1.1	orange1.1g036710m	CsiCYP93A124	ATGGCTAGGCTCCATGATTTTGGTCGATCAATTTTCGGAAGAAGTAAGATCACATCCAATCTTCCAACGAGTCCACTGGCATTACGAATAATTGGACATCTCCATCTCCTTGGCCCAATACCTCACCAAGCTCTTCACAAACTCTCCATGCGTTATGGACCCTTGATTCATTTTTTCCTTGGCTCAGTCCCTTGTATTGTTGCCTGCTCCCCTGAAACAGCAAAAGAGATCCTCAAAATCCATGAAACTTCTTTCTGTGACCGCCCCATTTCGGCTACTGTTGACTACCTTACATATGGCTCGGCTGATTTCGCATTTGCGCCTTATGGACCATACTGGAAGTTCATGAAGAAAATATGCATGACTCAACTTCTTGAAATAAAGCGATTTATGCAGCTC…		MARLHDFGRSIFGRSKITSNLPTSPLALRIIGHLHLLGPIPHQALHKLSMRYGPLIHFFLGSVPCIVACSPETAKEILKIHETSFCDRPISATVDYLTYGSADFAFAPYGPYWKFMKKICMTQLLEIKRFMQLMLKKAKASEAVDVGRELIRLTNNVMSRMTMGQICSNNEEEADEVMNLNLDLQGFGKKMKEARKRFDTMMERIIKEQEETRKTNKETGRDDALNDLLDILLTVSEDESSEIKLTMENIKAFIMNIFSGGTDTSAITIESLAELINHPDIMNKAKEEIDVVVGKNRLETLRLHHAGPMSVRESTENCTINGYEIPAKTRVFINVWSIGRDPKHWEAPLEFRPERFIAEDGKSQLDVRGQHYHYIPFVSGRRACPGISLALHKKVNGGD…
Citrus sinensis v1.1	orange1.1g039713m	CsiCYP93A68	ATGGCTGATTTTAGCGGCTGCATTATTCTTTCACTCATATGGCTAGTCTCATTGATCTTGGCCCGATCAATCCTCAGAAGAAGTAAGCGCACATCTTATTTTCCACCAAGCCCGATGGCATTGCCAATCATCGGACACCTCCACCTCCTTGCGCCGATACCTCACCAAGCTCTTCACAAACTCTCCATCCGCTATGGACCCTTGATTCATTTTCGCCTTGGCTCTGTCCCTTGTGTTGCTGTTTGCTCTGCAGACGTTGCGAAAGATTTCTTTAAGACCCACGAAACCTCTATACTTAACCGTCCCTTTTTGATTAACGTGGACTACATTACCTATGGCTCAGCCGATTTCTTGTTTGCCCCTTATGGACCTTACTGGAAGTTCATGAAGAAAATATGC…		MADFSGCIILSLIWLVSLILARSILRRSKRTSYFPPSPMALPIIGHLHLLAPIPHQALHKLSIRYGPLIHFRLGSVPCVAVCSADVAKDFFKTHETSILNRPFLINVDYITYGSADFLFAPYGPYWKFMKKICMTQLLGGQTLNQFLPIRFEEIRRFIRYVLKKAKASEEVDVGGQLIRLTNDVVTRMTMNYRCSDNEEEADEMRKVVSAATELTGKFNLADYIWFCKFLDLQGFGKRLKETLEKFDEMMERIIKEHQEARKINEEAGNDYTPNDLLDILLDISEDESSEIKLSRENIKSFIADMFAAGSDTPAITIEWALAQLINHPDVMKKAREEIDSVVGKSRLVEESDIVDLPYLQAIVKEVLRLHPTPMAVRESTESFTINGYEIPAKTRVFIN…
Citrus sinensis v1.1	orange1.1g042142m	CsiCYP93A69	ATGGTTGATTTCAGTGGCTACATTGTACTTTTCCTTGTATGGTTAGTCTCCACAATCTTGGTCCGATCAATCTTCCGGAGAAGTAAGATCACATCTAGTCTTCCACCAAGCCCAATGGCATTACCAATCATCGGACACCTCCACCTCCTTGCGCCAATACCTCACCAGGCACTTCACAAACTTTCCATCCGCTATGGACCCTTAATTCATTTGTTCCTTGGCTCAGTCCCATGTATTGTTGCTTGCTCCCCTGAAACAGCAAAGGAGATCCTCAAAACCCATGAAACTTCTTTCTGCGACCGCCCCATTTCAGCTACGGTTGACTACCTTACATATGGCTCAGCGGATTTCTCATTTGCTCCTTATGGACCTTACTGGAAGTTCATGAAGAAATTATGC…		MVDFSGYIVLFLVWLVSTILVRSIFRRSKITSSLPPSPMALPIIGHLHLLAPIPHQALHKLSIRYGPLIHLFLGSVPCIVACSPETAKEILKTHETSFCDRPISATVDYLTYGSADFSFAPYGPYWKFMKKLCMTQLLGGQTLNQFIPIRSEEIRRFMQLMLKKAKASEAVDVGKELIRLTNNVVSRMTMGQICSNNDKEADEVRKLVQETAELTGKFNLQDYIWFCKNIDLQGFGKRLKEVRRKFDNMMERIIKEHQEARKINKERGKDYAPMDLLDMLLDISEDESSEIKLTRENIKAFILDIFAAGTDTSAITVEWALAELINHPDMMKKAREEIDSVVGKSRLVEESDIINLPYLQALVKETLRLHPTGPMS
Citrus sinensis v1.1	orange1.1g043803m	CsiCYP93A67	ATGGCTGATTTCAGTGGCTACATTATACTTTTCCTTATATGGCTAGTCTCCATGATTTTGGTCCGAACAATTTTAGGAAGAAGTAAGATCACATCCAATCTTCCACCAAGTCCACTGGCATTACCAATCATTGGACTCTCTTGTATTGTTGCTTGCTCCCCTGAAACAGCAAAAGAGATCCTCAAAACCCATGAAACTTCTTTCTGTGACCGCCCCATTTCGGCTACTGTTGACTACCTTACATATGGCTCGGCTGATTTCGCATTTGCGCCTTATGGACCACACTGGAAGTTCATGAAGAAAATATGCATGACTCAACTTCTTGGTGGCCAAACACTGAACCAATTTATCCCCATTAGGTCTGAAGAAATAAAGCGATTTATGCAGCTCATGCTGAAG…		MADFSGYIILFLIWLVSMILVRTILGRSKITSNLPPSPLALPIIGLSCIVACSPETAKEILKTHETSFCDRPISATVDYLTYGSADFAFAPYGPHWKFMKKICMTQLLGGQTLNQFIPIRSEEIKRFMQLMLKKAKASEAVDVGRELIRLTNNVMPRMTMGQICSNNEEEADEVMNLVLSIFELSGKFNLADCIWFCKNLDLQGFGKKMKEARKRFDTMMERIIKEHEETRKTNKETGRDDAPNDLLDILLTVSEDESSEIKLTRENVKAFFMNIFSGGTDTSAITTEWALAELINHLDIMNKAKEEIDVVAGKNRLVEESDIANFPYLQALVKETLRLHPAGPMSVRESTENCTINGYEIPAKTRVFINVWSIGRDPKHWEAPLEFRPERFIAEDGKS…
Citrus sinensis v1.1	orange1.1g045624m	CsiCYP93A65	ATGGCTGGCATGCAAGATGCTGTACTTGTCCTCATCTGTGTAGCCTCCATCATCTTGGTTCGAGCCATCTTAGCCAAAACTCAAACCAGGGCTCGCCTCCCGCCGAGCCCACGCCGGTTACCAATCATAGGACACATGCACCTCCTCGGTCCAGTCCTCCCCAAAGCCTTTCACAATCTTTCAACCCGCAATGGCCCCTTAGTCCACTTCTTCATCGGCTCAAAGCCCTGCGTGCTTGCGTCCTCCCCTGAAATGGCCAAAGAATTTCTCAAAACCAACGAATCAATTTTCATGAACAGGCCCAAAACGGCCAATCTTGATTACATCACGTATGGCTCATCTGATTTCGCCACCGTGCATTATGGCCCTTACTGGAAGTTCATCAAGAAGCTCTGCATG…		MAGMQDAVLVLICVASIILVRAILAKTQTRARLPPSPRRLPIIGHMHLLGPVLPKAFHNLSTRNGPLVHFFIGSKPCVLASSPEMAKEFLKTNESIFMNRPKTANLDYITYGSSDFATVHYGPYWKFIKKLCMTELLGGRTLDQLRPIREEETKRFLRLMLKKAELGEAVNFGGELMRLTNNVISRMTLGQRCSDSEDEAGEVRKLVKELNVLGAKFNLSDTIWLFKNFDLQLGLKKQLKDARDRYDVMMERIIKEHEDERMKRKESGDGEGEIVKDLLDILLDIYEDENAEMRLTRENIKAFVMNIFGAGTDTSSITVEWGLAELINKPEVMEKARQEIDSVVGKSRIVEESDIPSLPYMQAVVKEILRLHPTGPLVVRESSEDCTIADYRIPAKTRL…
Citrus sinensis v1.1	orange1.1g046904m	CsiCYP93A125	ATGGTTGATTTCAGTGGCTGCATTTTTCTTCTCCTCATATTGCTAGTCTCCACGATCTTGGTCCGATCAATCTTCCGAAGAATTAAGACCACATATAGTCTTCCACCAAGCCCAATGGCATTACCGATCATCGGACACCTCCACCTCCTTGCCCCAATACCTCACCAAGCACTTCACAAACTTTCCATCCGCTACGGACCCTTAATTCATTTGTTCCTTGGCTCAGTCCCATGTGTTGTTGCTTGCTCCCCTGAAACAGCAAAGGAGATCCTCAAAACCCATGAAACTTCTTTCTGCGACCGCCCCATTTTGGTTGCGGTTGACTGCCTTACATATGGCGCAGCTGATTTCGCATTTGCTCCTTATGGACCTTACTGGAAGTTCATGAAGAAATTATGC…		MVDFSGCIFLLLILLVSTILVRSIFRRIKTTYSLPPSPMALPIIGHLHLLAPIPHQALHKLSIRYGPLIHLFLGSVPCVVACSPETAKEILKTHETSFCDRPILVAVDCLTYGAADFAFAPYGPYWKFMKKLCMTQLLGGQTLNQFIPIRSEEIRRFMQFMLKKAKASEAVDVGKELIRLVNNVVSRMTMGQICSNNDKEADEVRKLVQETAELVGKFNLQDYIWFCKNIDLQGFGKRFKEVRRKFDNMMERIIKEHQEARKINKETGKDYAPMNLLDMLLDISEDESSEIKLTRDNIKAFILDIFVAGTDTSAITVEWALAELINHPDMMKKAREEIDSVVGKSRLVEESDIINLPYLQALVKETLRFHPANPISIRESTEDCSINGYEIPAKTRVFI…
Citrus clementina v1.0	Ciclev10033322m	CclCYP93A68	ATGGCTGATTTTAGCGGCTGCATTATTCTTTCACTCATATGGCTAGTCTCATTGATCTTGGCCCGATCAATCCTCAGAAGAAGTAAGCGCACATCTTATTTTCCACCAAGCCCGATGGCATTGCCAATCATCGGACACCTCCACCTCCTTGCGCCGATACCTCACCAAGCTCTTCACAAACTCTCCATCCGCTATGGACCCTTGATTCATTTTCGCCTTGGCTCTGTCCCTTGTGTTGCTGTTTGCTCTGCAGACGTTGCGAAAGATTTCCTTAAGACCCACGAAACCTCTATACTTAACCGTCCCTTTTTGATTAACGTGGACTACATTACCTATGGCTCAGCCGATTTCTTGTTTGCCCCTTATGGACCTTACTGGAAGTTCATGAAGAAAATATGC…		MADFSGCIILSLIWLVSLILARSILRRSKRTSYFPPSPMALPIIGHLHLLAPIPHQALHKLSIRYGPLIHFRLGSVPCVAVCSADVAKDFLKTHETSILNRPFLINVDYITYGSADFLFAPYGPYWKFMKKICMTQLLGGQTLNQFLPIRSEEIRRFIRYVLKKAKASEEVDVGGQLIRLTNDVVTRMTMNYRCSDNEEEADEMRKVVSAATELTGKFNLADYIWFCKFLDLQGFGKRLKETLEKFDEMMERIIKEHQEARKINEEAGNDYAPKDLLDILLDISEDESSEIKLSRENIKSFIADMFAAGSDTPAITIEWALAQLINHPDVMKKAREEIDSVVGKSRLVEESDIVNLPYLQAIVKEVLRLHPTPMAVRESTESFTINGYEIPAKTRVFIN…
Citrus clementina v1.0	Ciclev10033441m	CclCYP93A66	ATGGCTGATTTGCAGGGTTTCTTTTTACCTTTCATTATTTGTCTAGTTTCCTTGCTCGTGGTACAAGCGATCTTCAGAAGAACCAGGATACAGTCTCGACTTCCACCAAGCCCAACCGCACTGCCAATCATTGGACATCTTCATCTTCTTGCTCCAATTCCTCACCAAGCCATTTACAAACTTTCAAGCCGCTATGGACCTTTGATTCATTTCTTCCTTGGATCAGTCCCCTGTGTTGTTGCTTGCTCCTCAGAAATAGCAAAAGAGTTACTCAAAACCCACGAAAACGCTTTCAGCAGCCGTCCAAAGATGCTTGCTGTTGACTACCTTACATATGGTTCAGCTGGTTTCATCTTTACTCCTTACGGACCTTATTGGAAGTTCATGAAGAAGTTATGT…		MADLQGFFLPFIICLVSLLVVQAIFRRTRIQSRLPPSPTALPIIGHLHLLAPIPHQAIYKLSSRYGPLIHFFLGSVPCVVACSSEIAKELLKTHENAFSSRPKMLAVDYLTYGSAGFIFTPYGPYWKFMKKLCMSELLGARTLNQLLPVRSEEIRRFIQMVLTKANAKEAVDVGLEINRLTNHIMSRMTMSQRCSDNEADEVRELVQSILQLCGKFNLADCFWFCKNLDLQGFGKKTNEARKTFDAMMERIIKEHEETRKLNKETSGDDAPKDLLDILLTISEDESSEVKLTRENIKAFILDMFSAGMDTTAVTIEWALAELINHPDIMNKARGEIDVVVGKKQITIVKETLRLHPTGPMIVRESIESCTINGYEIPAKTRVFINVWAIGRDPNHWEKP…
Citrus clementina v1.0	Ciclev10033553m	CclCYP93A65	ATGGCTGGCATGCAAGATGCTGTACTTCTCCTCATCTGTGTAGCCTCCATCATCTTGGTTCGAGCCATCTTCGCCAAAACTCAAACCAGGGCTCGCCTCCCGCCGAGCCCACGCCGGTTACCAATCATAGGACACATGCACCTCCTCGGTCCAGTCCTCCCCAAAGCCTTTCACAATCTTTCAACCCGCAATGGCCCCTTAGTCCACTTCTTCATCGGCTCAAAGCCCTGCGTGCTTGCGTCCTCCCCTGAAATGGCCAAAGAATTTCTCAAAACCAACGAATCAATTTTCATGAACAGGCCCAAAACGGCCAATCTTGATTACATCACGTATGGCTCATCTGATTTCGCCACCGTGCATTATGGCCCTTACTGGAAGTTCATCAAGAAGCTCTGCATG…		MAGMQDAVLLLICVASIILVRAIFAKTQTRARLPPSPRRLPIIGHMHLLGPVLPKAFHNLSTRNGPLVHFFIGSKPCVLASSPEMAKEFLKTNESIFMNRPKTANLDYITYGSSDFATVHYGPYWKFIKKLCMTELLGRRTLDQLRPVREEETKRFLRLMLKKAELGEAVNFGGELMRLTNNVISRMTLGQRCSDSEDEAGEVRKLVKELNVLGAKFNLSDTIWLFKNFDLQLGLKKQLKDARDRYDVMMERIIKEHEDERMKRKESGDGEGEIVKDLLDILLDIYEDENAEMRLTRENIKAFVMNIFGAGTDTSSITVEWGLAELINKPEVMEKARQEIDSVVGKSRIVEESDIPSLPYMQAVVKEILRLHPTGPLVVRESSEDCTIADYRIPAKTRL…
Citrus clementina v1.0	Ciclev10033669m	CclCYP93A70	ATGGTTGATTTCAGAGGCTACATTGTACTTTTCCTCGTATGGCTAGTCTCCACAATCTTGGTCCGATCAATCTTCCGGAGAAGTAAGACCACATCTAGTCTTCCACCAAGCCCAATGGCATTACCGATCATCGGACACCTCCACCTCCTTGCCCCAGTACCTCACCATGCACTTCACAAACTTTCCATCCGCTATGGACCCTTAATTCATTTGTACCTTGGCTCAGTCCCATGTGTTGTTGCTTGCTCCCCTGAAACAGCAAAGGAGATCCTCAAAACCCATGAAACTTCTTTCAGCGACCGCCCCATTTCGGTTGCGGTTAACTGCCTTACATATGGCTCAGCTGATTTCTCATTTGCTCCTTATGGACCTTACTGGAAGTTCATGAAGAAATTATGC…		MVDFRGYIVLFLVWLVSTILVRSIFRRSKTTSSLPPSPMALPIIGHLHLLAPVPHHALHKLSIRYGPLIHLYLGSVPCVVACSPETAKEILKTHETSFSDRPISVAVNCLTYGSADFSFAPYGPYWKFMKKLCMTQLLGGQTLNQFIPIRSEEIRRFMQFMLKKAKASEAVDVGKELIRLVNNVVSRMTMGQICSNNDKEADEVRKLVQETAELVGKFNLQDYIWFCKNIDLQGFGKRFKEVRRKFDNMMERIIKEHQEARKINKETGKDYAPMDLLDMLLDISEDESSEIKLTRDNIKAFILDIFVAGTDTSAITIEWALAELINHPDMMKKTREEIDSVVGKSRLVEESDIINLPYLQALVKETLRLHPAAPMPVRESTENCTINAHEIPARTRVFI…
Citrus clementina v1.0	Ciclev10033811m	CclCYP93A69	ATGGTTGATTTCAGAGGCTACATTGTACTTTTCTTCGTATGGCTAGTCTCCACAATCTTGGTCCGATCAATCTTCCGGAGAAGTAAGACCACATCTAGTCTTCCACCAAGCCCAATGGCATTACCAATCATCGGACACCTCCACCTCCTTGCCCCAATACCTCACCAGGCACTTCACAAACTTTCCATCCGCTATGGACCCTTAATTCATTTGTTCATTGGCTCAGTCCCATGTATTGTTGCTTGCTCCCCTGAAACAGCAAAAGAGATCCTCAAAACCCATGAAACTTCTTTCTGCGACCGCCCCATTTCAGCTGCGGTTGACTACCTTACATATGGCTCAGCTGATTTCTCATTTGCTCCTTATGGACCTTACTGGAAGTTCATGAAGAAATTATGC…		MVDFRGYIVLFFVWLVSTILVRSIFRRSKTTSSLPPSPMALPIIGHLHLLAPIPHQALHKLSIRYGPLIHLFIGSVPCIVACSPETAKEILKTHETSFCDRPISAAVDYLTYGSADFSFAPYGPYWKFMKKLCMTQLLGGQTLNQFIPIRSEEIWRFMQLMLKKAKASEAVDVGKELIRLTNNVVSRMTMGQICSINDKEADEVRKLVQETAELAGKFNLQDYIWFCKNIDLQGFGKRLKEVRRKFDNMMERILKEHQEARKINKETGKDYAPMDLLDMLLDISEDESSEIKLTRENIKAFILDIFAAGTDTSAITVEWALAELINHPDMMKKTREEIDSVVGKSRLVEESDIINLPYLQALVKETLRLHPTGPMSVRESTENCTINGYEIPARTRVFI…
Citrus clementina v1.0	Ciclev10033949m	CclCYP93A67	ATGGCTGATTTCAGTGGCTACATTATACTTTTCCTTATATGGCTAGTCTCCATGATTTTGGTCCGAACAATTTTAGGAAGAAGTAAGATCACATCCAATCTTCCACCAAGTCCACTGGCATTACCAATCATTGGACTCTCTTGTATTGTTGCTTGCTCCCCTGAAACAGCAAAAGAGATCCTCAAAACCCATGAAACTTCTTTCTGTGACCGCCCCATTTCGGCTACTGTTGACTACCTTACATATGGCTCGGCTGATTTCGCATTTGCGCCTTATGGACCACACTGGAAGTTCATGAAGAAAATATGCATGACTCAACTTCTTGGTGGCCAAACACTGAACCAATTTATCCCCATTAAGTCTGAAGAAATAAAGCGATTTATGCAGCTCATGCTGAAG…		MADFSGYIILFLIWLVSMILVRTILGRSKITSNLPPSPLALPIIGLSCIVACSPETAKEILKTHETSFCDRPISATVDYLTYGSADFAFAPYGPHWKFMKKICMTQLLGGQTLNQFIPIKSEEIKRFMQLMLKKAKASEAVDVGRELIRLTNNVMPRMTMGQICSNNEEEADEVMNLVLSIFEFSGKFNLADCIWFCKNLDLQGFGKKMKEARKRFDTMMERIIKEHEETRKTNKETGRDDAPNDLLDILLTVSEDESSEIKLTRENVKAFFMNIFSGGTDTSAITTEWALAELINHLDIMNKAKEEIDVVAGKNRLETLRLHPAGPMSVRESTENCTINGYEILAKTRVFINVWSIGRDPKHWEAPLEFRPERFIAEDGKSQLAVRGQHYHFIPFGSG…
Gossypium raimondii v2.1	Gorai.002G228600.1	GraCYP93A87	ATGGCTGATTTTCAAGCCTACTTCTTAGTTTTCTTCCTTTGGCTACTGTCTTTCATTTTGTTCAGAACCATATTCACCAAGAACCGGACCACCACACGTCTTCCACCTAGTCCAATAGCCTTACCAATCATCGGACACCTCCACCTCCTTGCTCCCATACCTCACCAAGCCCTTCACAAGCTTTCAACTAAACATGGACCCTTAATACATATCCGTCTCGGTTCTGTCCCATGTGTCGTGGCTTCCTCTCCGGAAATAGCCAAGCAGTTCCTCAAAACCCACGAATCATCTTTCTCAAACCGACCGATAACCGCCGTTGTTGACTACCTTACATATGGCTCAGCTGATTTCTCCTTTGCTCCTTACGGACCGTACTGGAAATTCATGAAGAAAATCTGC…		MADFQAYFLVFFLWLLSFILFRTIFTKNRTTTRLPPSPIALPIIGHLHLLAPIPHQALHKLSTKHGPLIHIRLGSVPCVVASSPEIAKQFLKTHESSFSNRPITAVVDYLTYGSADFSFAPYGPYWKFMKKICMSELLSGRMLDQFLLVRREELIRFLQFMLKTANASEKVDVGGELVRLTNNIVSRMIMNDRCCNNEDEAEEVRKLVEVIAKLSGQFNLSDFIWFCKNLDLQGMNKKLKQVRDKFDSMMDRIIKEHEEARKTNKDDNTVKDLLDVLLDISQDESSEMRLTRENIKAFILDLFVAGTDTSAVTIEWALSELINHPNIMEKARQEIDIVVGKDKIVQESDITNLPYLQAIVKETLRLHPAGPMIVRESSEDCNIEGYEIPAKTRLFINVW…
Gossypium raimondii v2.1	Gorai.002G228700.1	GraCYP93A88	ATGGCTGATCTAGGAGATCATGCTATACTTGTCACAATATGCCTAGCAACCATTTTCTTGTTCCTAGCCATCTTTGTGAAGACTCGGGCAAAGGGCCGACGGCCACCTAGCCCTCCAGCCTTACCGATCATCGGACATCTCCACCTTCTTCGCCCTATACCACACCGAGGTCTTCACAAGCTCTCAACCGGCTATGGACCAATAGTATCCTTCTACCTTGGCTCCAAACATTGTGTCGTTGTTTCATCCCCGGAAATAGCAGAAGAATTCCTTAGAACTAATGAAACATCTTATTTGGACCGCCCTAAAATGGCCAACTTCGATTACCTTACCTATGGCACGTCTGATTTTTCGACCGCACCGTATGGACCACGTTGGAAGTTGATGAAGAAGCTTTGC…		MADLGDHAILVTICLATIFLFLAIFVKTRAKGRRPPSPPALPIIGHLHLLRPIPHRGLHKLSTGYGPIVSFYLGSKHCVVVSSPEIAEEFLRTNETSYLDRPKMANFDYLTYGTSDFSTAPYGPRWKLMKKLCMSEVLGPRTLEKLLPIRREEIRSFLKMIKNKAEIGGSVDVVAELMTLTNNTISRMTVSHRCSSDENKADEIRKMMREMNDLGTKFNLADIIWFCKNLDLQGFKKRLVEVRHRYDTMMERIIKEHEEERKKRNESGDEVKDFLDILLDVYEDESSEVKLTRENVKAFILNLFGAGTDTSSTTMGWGLAEILNNPEVMEKAREEIDCVVGKKRILEESDVGNLPYLQAIVKETLRLHPSGPFIVRESTKACVIAGYEIPADTRLYVNV…
Gossypium raimondii v2.1	Gorai.006G140700.1	GraCYP93A89	ATGGTTGATTCTCAAGAATACATTCTTCTCTTCCTTATCTGGTTCATAACCATCCTCTTTCTCCGAGCCATCCTTAGCAACTCACGAGGGAAAAAACCCCATCTTCCACCCACCCCACGTGCCCTTCCAGTTATTGGACACATGCACCTCCTTGGCCCCATACCTCACCAAGCTCTTAACAAACTTTCAGACCGCTTTGGACCTTTGGTCTACTTCTACATCGGATCAAAGCCTTGTCTGCTTGTGTCTTCCCAAGAAACCGCAAAAGAAGTATTTAAAAACCATGAAACTACTTTCTTAAACCGCCCAAAAATGGCCAATCTTGATTACCTTACATATGGTACTGCTGATATGGCCATGGCACCTTATGGTCCCCTTTGGAAGTACATGAAGAAACTT…		MVDSQEYILLFLIWFITILFLRAILSNSRGKKPHLPPTPRALPVIGHMHLLGPIPHQALNKLSDRFGPLVYFYIGSKPCLLVSSQETAKEVFKNHETTFLNRPKMANLDYLTYGTADMAMAPYGPLWKYMKKLCMSELLGTRTLDQLLPVRREEMTRFVRLIQDKAETGEALDVGVELMRLTNNIISRMLLSKRCSDKEDEANEVQTIVKEMNKLGTKFNLSDLLWFCKNLDLQGFRKRLKDVRDRYDILMEKIILEHKEARKKNKSTAADTMKDVLDILIEISEDQNAEMKLTAENVKAFVMNFFGAGTDTSSVTIGWGIAELINHPNVMEKVQKEIDSVVGRNRILEESDISNLPYLQAIVKETLRLHPGGPLVVRESTEDCVISGYEIPEGTRLFV…
Theobroma cacao v1.1	Thecc1EG024848t1	TcaCYP93A88	ATGTCTGATTTAGGAGATCATGCTATACTTGTCACTGTATGCCTAGCAACCATCGTTTTGTTCTTAGCCATCTTTGCAAAGACCCGTGCAAAGGGTCGACGACCACCGAGCCCTCCAGCCCTACCAATCATTGGACATCTCCACCTTCTTCGCCCTATACCTCACCAAGGTCTTCACAAGATCTCCACCCGCTATGGACCAATAGTATCCTTCTACCTTGGCTCAAAACATTGCGTCCTTGTTTCCACCCCGGACATAGCAGAAGAATTCCTGAAAACTAATGAAGCTTCTTACTTAGACCGCCCTAAAATGGCCAACTTCGATTACCTTACCTACGGCACATCCGATTTTTCCACGGCACCTTATGGACCACGTTGGAAGTTGATGAAGAAGCTTTGC…		MSDLGDHAILVTVCLATIVLFLAIFAKTRAKGRRPPSPPALPIIGHLHLLRPIPHQGLHKISTRYGPIVSFYLGSKHCVLVSTPDIAEEFLKTNEASYLDRPKMANFDYLTYGTSDFSTAPYGPRWKLMKKLCMSELLGPRTLEKLLPIRREEIRSFLKMTKKKAEKGEPIDVVAELMTLTNNTISRMMVSYRCSGDENKADEIRKMMREMNGLGTKFNLADVIWFCKNLDLQGFRKRLVEVRDRYDTMMERIIKEHEEERRKRKEMGNESDTVKDLLDILLDIYEDESAEVRLTRENIKAFILNLFGAGTDTSSTTMGWGLAELINNPNVMEKARQEIDSVVGKKRILEESDVANLPYLQAVVKETLRLHPSGPFIVRESTKACVIAGYEIPADTRLY…
Theobroma cacao v1.1	Thecc1EG024850t1	TcaCYP93A89	ATGAGGAATCCAATTGCTTCTGCCTTTCGCAACACTAGTCACTATATTTCTAGTGTGACAGCCTATGAATCTGAAGGAGAAGGTTCCACAGCTGAGTTAAAACAAATCTTGCTACCTCTAATGGCAGCTTTCACATCTCTATTTACAATCAAACTTGCGGGGACCATAAATTACATCATTGTCTTCCTTATCTGGTTAATAACCATCATCTTTCTCCGAGCTATCCTCAGCAAAAAACGAGGCAAAGCTCATCTTCCACCAAGCCCACGTGCTCTACCAATTATTGGACACATGCACCTCATTGGCCCTATACCTCACCAAGCCCTTACCAAGCTCTCAAACTGCTATGGACCTTTGATTTATTTCTATATTGGATCAAAACCTTGTGTGCTTGTTTCC…		MRNPIASAFRNTSHYISSVTAYESEGEGSTAELKQILLPLMAAFTSLFTIKLAGTINYIIVFLIWLITIIFLRAILSKKRGKAHLPPSPRALPIIGHMHLIGPIPHQALTKLSNCYGPLIYFYIGSKPCVLVSSQELAKEVFKNHETTFLNRPKMANLDYLTYGTADMAMAPYGPLWKFMKKLCMSELLGTRTLDQLLPVRREEMKRFVKTIQEKAEAGEAVDIGVELMRLTNNIISRMLLSKRCSDKEDEANEVQTLVKEMNNLGTKFNLSDLLWFCKNLDLQGFRKRLKDVRDRYDILMEKIILEHKEARNKNGAGGDRIKDVLDILIDISEDENAEMKLTRENIKAFVMNFFGAGTDTSSITIGWGVSELINHPSVMEKARKEIDTVVGRNRILEE…
Theobroma cacao v1.1	Thecc1EG024852t1	TcaCYP93A87	ATGGCTGATTTCCAACCCTACATCATACTTTTCCTCATTTGGCTAGTGTCCCTTATTTTGGTCAGAAGAATCTTCACCAAGAGCCGGACCACCTCACGTCTCCCACCAAGCCCAATGGCCATTCCTATCATTGGGCACCTCCACCTCCTTTCACCAATACCTCACCAGGCTCTTCACAAACTTTCAACCAAAAATGGACCCTTAATGCATGTCCTGCTTGGCTCTGTCCCTTGTGTTGTGGCTTCCACCCCAGAAATGGCAAAAGAGTTCCTTAAAACTCACGAGTCGTCTTTCTCCAACCGTCCAAAAACAGCTGCTGTTGACTACCTTACATATGGCTCAACAGATTTCTCCTTTGCTCCCTACGGACCGTACTGGAAGTTCATGAAGAAAATTTGC…		MADFQPYIILFLIWLVSLILVRRIFTKSRTTSRLPPSPMAIPIIGHLHLLSPIPHQALHKLSTKNGPLMHVLLGSVPCVVASTPEMAKEFLKTHESSFSNRPKTAAVDYLTYGSTDFSFAPYGPYWKFMKKICMSELLSGRMLDQFLPVRREELRQFLQFLMKKVNASEKVDVGGELVRLTNNIVSRMTMNQTCSNDEDEAEEVRKLVQAIAELSGQFNLSDFIWFCKNLDLQGMNKKLKEVRDKFDAMMDKIIREHEEARKRKEDGGDAVKDLLDILLDISEDESSEMRLTRENIKAFILDIFAAGTDTSAVTTEWALAELINHPNIMEKARAEIDIVVGRNRIVEESDTTNLPYLQAIVKETLRLHPTGPMIVRESSEHCTVGGYDIPAKTRLFVNV…
Carica papaya ASGPBv0.4	evm.model.supercontig_85.105	CpaCYP93A11	ATGACAATGGTTGATGTGCAAAACTGCACTATACTCTTCTTGGCTTGGCTAGCCTCCATTGCCTTGTTTCGAACCATCTGGACCAAGCTGAAGGCGAGGGCTCAACTTCCACCTGGTCCGCGACCCCTACCCATCATCGGAAACCAACATCTCCTCCGCCCAATAGCTCATCAAGCTCTTCACAAACTATCCCTAAACTATGGACCCTTGATGTGTCTCTTCTTTGGCTCAAAACCTTGTGTTGTTGTATCCTCTCCGGAAATGGCTCAAGAAGTTCTTAAAACCCATGAAACTCTTTTCTTGAACCGACCAAACATTGCCAACATCGACTACCTTACATATGGTTCGTCTGATTTAACAAGGGCACCTTATGGACCTTACTGGAAGTTCATGAAAAAG…		MTMVDVQNCTILFLAWLASIALFRTIWTKLKARAQLPPGPRPLPIIGNQHLLRPIAHQALHKLSLNYGPLMCLFFGSKPCVVVSSPEMAQEVLKTHETLFLNRPNIANIDYLTYGSSDLTRAPYGPYWKFMKKICMSELLNGQTVEQFRPIRQEEVNRFLQQILSKAKAGETFDVRTGIVRLTSNVISRMALTHRSWFGNYKTDEMRQLVGEMNDLVGKGSLLDLIWFLKNLDLQGLRKRLKNARDQYNNVMEGIIKECEEVKRKRKESSNGNNPRKDVLESLLDIYEDSSSEIKLTRENVKALIMNLLGAGTDSIAFAIEWAFSELINNPEVMEKARKEIDSVVGKTRIVEETDIPNLPYIQAIVKESLRLHPTGPLFSRESSEECTIKCYKIPAKTK…
Carica papaya ASGPBv0.4	evm.model.supercontig_85.107	CpaCYP93A13	ATGCCAGATTTCCAAGGTTACTTTGTTCTGTTTCTCATTTGGCTAGTTTCCATGATTGCAATGCGAGCAATCTTAACAAAAACCAGGAAAGCATCTTGCCGTCCCCCAAGCCCATTGGCCCTACCTATTATTGGTCACCTTCACTTAATAGGTCCCATTCCTCACCAAGGTCTACACAAGCTCTCGACTCGCTATGGACCTTTAATTCATATCTTTCTCGGCTCTGTCCCTTGTGTTGTGGCTTCCTCAGCAGAAATGGCTAAAGAATTCCTAAAAACCCATGAAGCATCTTTCTCTGATCGTCCGCGTACCATTGCTGTTGACTACCTTACATATGGCTCAGCTGATTTTTCTTTTGCTAATTATGGGCCTTACTGGAAGTTCATGAAGAAAATTTGC…		MPDFQGYFVLFLIWLVSMIAMRAILTKTRKASCRPPSPLALPIIGHLHLIGPIPHQGLHKLSTRYGPLIHIFLGSVPCVVASSAEMAKEFLKTHEASFSDRPRTIAVDYLTYGSADFSFANYGPYWKFMKKICMSELLGGRTLDQFIPVKQEEIRWFLSLMLKKAKAVEALDVGKELIRLTNNVISRMTMGQTCTNDDNETEEVKKLVQAVAELTGKFNLSDYIWFCKNLDLQGFKKKLKEVHYRFDTMMERIMREHEEARKTKKPMNAGSHKVKDLLDILLQISEDESSEIKLTRENIKAFILDVFAAGTDTAAITVEWALAELINHPNIMEKAQAEIDNVVGRNRLVNESDIANLPYLQALVKETLRLHPTGPMIVRESTEECIINGYEIPARTQLF…
Brassica rapa FPsc v1.3	Brara.B00226.1	BraCYP93D1	ATGATGGATACACAATACTTCATTGTAACAATCCTTCTATGCCTTGGAATCATACTCTTGATCCAATCCATAAACACCTATAGATTCCGCAATAAACTATCTCTTCCACCAAGTCCAACAGCTTTACCAATCATCGGTCACATTCACCTTCTTGGTCCCATAGCTCACCAAGCACTTCACAAGCTCTCAACCCACTACGGACCCTTGATGTATCTCTTCATTGGCTCCATCCCTAATGTCATTGTCTCATCAACCGAGATGGCAAATGAAATTCTCAAATCCAATGAGCTCAACTTCTTGAACCGTCCAACAATGCAAAATGTTGACTACCTTACTTATGGCTCAGCTGATTTCTTCTCAGCGCCTTATGGGCTTCACTGGAAGTTCATGAAGAGGATT…		MMDTQYFIVTILLCLGIILLIQSINTYRFRNKLSLPPSPTALPIIGHIHLLGPIAHQALHKLSTHYGPLMYLFIGSIPNVIVSSTEMANEILKSNELNFLNRPTMQNVDYLTYGSADFFSAPYGLHWKFMKRICMMELFSSRAIDRFANVRTEELRKLLVRVMKKAEIEESVDLGEQLKELTSSIITRMMFRERRSDSGRREEVIKMVVELNELAGFFNVSETFWFLRRLDLQGIKKRLKNARERYDVIIERIMKEHESRNHKDAGGVRSMLDILLDIYEDKNSEIKLTRENIKGFIMNIYGGGTDTSAITVEWALSELINNPEIMKKAQQEIEQVVGDKRLVQESDLCNLSYIQAVVKETLRLHPGGPIFVRESNEECAVAGYRIPAKTRVIVNVWAI…
Arabidopsis lyrata	892616	AlyCYP93D1	ATGGTGGATATACAATACTTCTTCATAATCATTCCTTTATGCCTTGGAATCACAGTCTTGATCCAAGCCATTACTAACAGATTACGCAACAAACTACCGCTCCCACCAAGCCCAACAGCTTTACCGATCATCGGTCACATTCACCTCCTTGGTCCCATAGCTCACCAAGCACTTCACAAACTCTCAATCCGCTACGGACCCTTGATGTATCTCTTCATTGGCTCCATTCCTAATCTTATTGTCTCATCGGCCGAGATGGCGAATGAGATTCTCAAATCCAATGAGCTCAACTTCCTGAACCGTCCCACAATGCAAAACGTTGACTACCTTACTTATGGCTCTGCGGATTTCTTCTCAGCGCCTTACGGGCTTCGCTGGAAGTTCATGAAGAGAATTTGT…		MVDIQYFFIIIPLCLGITVLIQAITNRLRNKLPLPPSPTALPIIGHIHLLGPIAHQALHKLSIRYGPLMYLFIGSIPNLIVSSAEMANEILKSNELNFLNRPTMQNVDYLTYGSADFFSAPYGLRWKFMKRICMVELFSSRALERFVSVRSEELRKLLIRVLKKAEAEESVNLGEQLKELTSNIITRMMFREMQSDSEGDGKTEEVIKMVVELNELAGFFNVSETFWFLRRLDLQGLKKRLKNVRDKYDVIIERIMKEHESRNKKDTGARNMLDILLDIYEDKNAEVKLTRENIKAFIMNIYGGGTDTSAITVEWALAELINHPEIMKKAQQEIEQVVGNKRVVEESDLCNLSYIQAVVKETMRLHPGGPIFVRESDEECAVAGFRIPAKTRVIVNVWG…
Arabidopsis thaliana	AT5G06900.1	AtCYP93D1	ATGGTGGATTTACAATACTTCTCCGTAATCATCCTTGTATGTCTTGGAATCACAGTCTTGATCCAAGCTATTACTAACAGATTACGTGACAGACTTCCACTCCCACCAAGCCCAACAGCTTTACCGATCATCGGTCACATTCACCTCCTTGGTCCCATAGCTCACCAAGCACTTCACAAGCTCTCAATCCGCTACGGACCTTTGATGTATCTCTTCATTGGCTCTATTCCTAATCTTATTGTCTCATCAGCCGAGATGGCGAATGAGATTCTCAAATCCAATGAACTCAACTTCCTGAACCGTCCCACAATGCAAAACGTTGACTACCTTACTTATGGCTCAGCCGATTTTTTCTCAGCGCCTTACGGGCTTCACTGGAAGTTCATGAAGAGAATTTGT…		MVDLQYFSVIILVCLGITVLIQAITNRLRDRLPLPPSPTALPIIGHIHLLGPIAHQALHKLSIRYGPLMYLFIGSIPNLIVSSAEMANEILKSNELNFLNRPTMQNVDYLTYGSADFFSAPYGLHWKFMKRICMVELFSSRALDSFVSVRSEELKKLLIRVLKKAEAEESVNLGEQLKELTSNIITRMMFRKMQSDSDGGEKSEEVIKMVVELNELAGFFNVSETFWFLKRLDLQGLKKRLKNARDKYDVIIERIMEEHESSKKNATGERNMLDVLLDIYEDKNAEMKLTRENIKAFIMNIYGGGTDTSAITVEWALAELINHPEIMKKAQQEIEQVVGNKRVVEESDLCNLSYTQAVVKETMRLHPGGPIFVRESDEECAVAGFRIPAKTRVIVNVWA…
Brassica oleracea v2.1	Bol024524	BolCYP93D1	ATGAAGAAAGCAGAAGCAGAAGAGAGTGTTGATCTTGGTGAACAGCTAAAGGAGTTGACAAGCAGCATCATAACGAGAATGATGTTCAGAGAAAGGAGATCGGATAGTGGGATAAGAGAGGAAGTTATCAAAATGGTGGTGGAGTTGAATGAGCTAGCAGGGTTCTTCAACGTGTCTGAAACGTTTTGGTTCTTGAGGAGACTTGACCTGCAAGGAATCAAGAAGAGGCTCAAGAATGCTAGAGACAAATATGATGTGATCATAGAGAGGATAATGAAAGAGCATGAGTCTAGGAATCACATGGATGCAGGAGGTAACATTTATGGAGGTGGAACAGATACATCTGCCATCACAGTAGAATGGGCTTTATCAGAGCTAATAAACTATCCAGAGATCATG…		MKKAEAEESVDLGEQLKELTSSIITRMMFRERRSDSGIREEVIKMVVELNELAGFFNVSETFWFLRRLDLQGIKKRLKNARDKYDVIIERIMKEHESRNHMDAGGNIYGGGTDTSAITVEWALSELINYPEIMKKARKEIEQVVGNKRLVQESDLCNLSYIQAVVKETLRLHPGGPIFVRESNEECAVAGYRIPAKTRVIVNVWAIGRDPNQWEDPLEFRPERFEGSEWKVMSEKMVSFGAGRRSCPGEKMVFRFVPLVLAAVIQCFELKVKGRVEMSEGSGSSLPRATPLVCVPVAREGIKSLFSLEPKVNF*
Brassica oleracea v2.1	Bol035986	BolCYP93D2P	ATGAAGAAATCAGAAGTAGAAGAGAGTGTTGATCTTGGTGAACAGCTTAAGGAGTTGACAAGCAGCATCATAACGAGAATGATGTTCAGAGAGAGGAGATCAGATAGTGGGATAAGAGAGGAAGTTATTACAATGGTGGTGGAGTTGAACGAACTAGCAGGGTTTTTCAATGTTTCTGAAACGTTTTGGTTCTTGAGAAGACTTGACCTGCAGGGAATCAAGAAGAGGCTCAAGAATGCTAGAGAAAGATATGATGTGATCATAGAGAGAATAATGAAAGAGCATGAGTCTAGGAATCACAAGGAGGCAGGAGGAGCAAGGAGCATGCTAGACATTTTGCTTGACATATATGAAGACAAAAACTCAGAGATGAAATTGACAAGAGAAAACATTAAGGGC…		MKKSEVEESVDLGEQLKELTSSIITRMMFRERRSDSGIREEVITMVVELNELAGFFNVSETFWFLRRLDLQGIKKRLKNARERYDVIIERIMKEHESRNHKEAGGARSMLDILLDIYEDKNSEMKLTRENIKGFIMNIYGGGTDTSAITVEWALSELINHPEIMKKAQQEIEQAVGNRRLVKESDLCNLSYIQAVVKETLRLHPGGPIFVRESNEECAVAGYRIPAKTRVMVNVWAIGRDPNQWEDPLEFRPERFEGSEWKITSEKMVSFGAGRRSCPGEKMVFRFVPLVLAAVIQCFELKVKGRVEMNEGSGSSLPRATPLVCVPVARMDIKSFISLEPKVNF*
Boechera stricta v1.2	Bostr.13129s0285.1	BstCYP93D1	ATGAGAATGGTGGATTTACAATACTTCTTTGTAATCATCCTTCTATGCCTTGGAATTATAGTCTTGATCCAAGCCATAATTACCTACAGATTCCGCAACAAACTTTCGCTTCCACCAAGCCCAACAGCTTTACCGATCATCGGTCACATTCACCTTCTTGGTCCCATAGCTCACCAAGCACTCCACAAACTCTCAAACCGCTACGGACCCTTGATGTATCTCTTCATTGGCTCCATTCCTAATCTTATTGTCTCATCGGCCAATATGGCGAATGAGATTCTCAAATCCAAAGAGCTCAACTTTCTGAACCGTCCCACATTGCAAAACGTTGACTACCTTACTTATGGCTCAGCCGATTTCTTCTCAGCGCCTTACGGGCTTCACTGGAAGTTCATGAAG…		MRMVDLQYFFVIILLCLGIIVLIQAIITYRFRNKLSLPPSPTALPIIGHIHLLGPIAHQALHKLSNRYGPLMYLFIGSIPNLIVSSANMANEILKSKELNFLNRPTLQNVDYLTYGSADFFSAPYGLHWKFMKRIFMMELFSSKALDSFVSVRSEELRKLLLRVLKKAEAEESVNLGEQLKELTSNIITRMMFRKMQSDSDSGGKTEEVIKMVVELNELAGFFNVSETFWFLKWFDLQGLKKRLKDARDKYDVIIERIMEEHESREKKDAEARNMLDILLDIYEDKNAEMKLTRENIKAFIMNIYGGGTDTSAITVEWALAELINHPEIMKKAQQEIEQVVGNKRVVEESDLCNLSYIQAVVKETMRLHPGGPIFIRESDKECAVAGFRIPAKTRVIFN…
Capsella grandiflora v1.1	Cagra.8005s0027.1	CgrCYP93D1	ATGAGAATGGTGGATTTACAATACTTCTTTGTAACAATCCTTCTATGCCTTGGGATTACAGTCTTGATCCAAGCCATTACAAACAGATTACGCAACAAACTACCACTCCCACCAAGCCCAACAGCTTTACCAATCATTGGTCACATTCACCTTCTTGGTCCCATAGCTCACCAAGCACTCCACAAGCTCTCAAACCGCTATGGACCCTTGATGTATCTCTTCATTGGCTCCATCCCTAATCTTATTGTCTCATCGGCAGAGATGGCAAATGAGATTCTCAAATCCAATGAGCTCAACTTCTTGAACCGTCCCACAATGCAAAACGTTGACTACCTTACTTATGGCTCAGCGGATTTCTTCTCAGCCCCTTATGGGCTTCACTGGAAGTTCATGAAGAAA…		MRMVDLQYFFVTILLCLGITVLIQAITNRLRNKLPLPPSPTALPIIGHIHLLGPIAHQALHKLSNRYGPLMYLFIGSIPNLIVSSAEMANEILKSNELNFLNRPTMQNVDYLTYGSADFFSAPYGLHWKFMKKICMMELFSSRALDSFVSVRSEELRKLLNRILKKAEAEESVNLGEQLKELTSNIITRMMFREMQPDSDAGGKTEEVIKMLVELNELAGFFNVSETFWFLKRLDLQGLKRRLKNARDKYDLIIERIMKEHEYVKKKDAGARKMLDILLDIYEDKNAEIKLTRENIKAFIMNIYGGGTDTSAITVEWALAELINHPEIMKKAQQEIEQNVGNKRVVEESDLKNLSYIQAVVKETMRLHPGGPIFVRESDEECAVAGFRIPAKTRVIVNV…
Capsella rubella v1.0	Carubv10003036m	CruCYP93D3	ATGAGAATGGTGGATTTACAATACTTCTTTGTAACAATCCTTCTATGCCTTGGGATTACAGTCTTGATCCAAGCCATTACAAACAGATTACGCAACAAACTACCACTCCCACCAAGCCCAACAGCTTTACCAATCATTGGTCACATTCACCTTCTTGGTCCCATAGCTCACCAAGCACTCCACAAGCTCTCAAACCGCTATGGACCCTTGATGTATCTCTTCATTGGCTCCATCCCTAATCTTATTGTCTCATCGGCAGAGATGGCAAATGAGATTCTCAAATCCAATGAGCTCAACTTCTTGAACCGTCCCACAATGCAAAACGTTGACTACCTTACTTATGGCTCAGCGGATTTCTTCTCAGCCCCTTATGGGCTTCACTGGAAGTTCATGAAGAAA…		MRMVDLQYFFVTILLCLGITVLIQAITNRLRNKLPLPPSPTALPIIGHIHLLGPIAHQALHKLSNRYGPLMYLFIGSIPNLIVSSAEMANEILKSNELNFLNRPTMQNVDYLTYGSADFFSAPYGLHWKFMKKICMMELFSSRALDSFVSVRSEELRKLLNRILKKAEAEESVNLGEQLKELTSNIITRMMFREMQPDSDAGGKTEEVIKMLVELNELAGFFNVSETFWFLKRLDLQGLKRRLKNARDKYDLIIERIMKEHEYVKKKDAGARKMLDILLDIYEDKNAEIKLTRENIKAFIMNIYGGGTDTSAITVEWALAELINHPEIMKKAQQEIEQNVGNKRVVEESDLCNLSYIQAVVKETMRLHPGGPIFVRESDEECAVAGYRIPAKTRVIVNV…
Capsella rubella v1.0	Carubv10007960m	CruCYP93D1	ATGGTGGATTTGCAATACTTCTTTGTAACAATCCTTCTATGCCTTGGGATTACAGTCTTGATCCAAGCCATTACAAACAGATTACGCAACAAACTACCACTCCCACCAAGCCCAACAGCTTTACCAATCATCGGTCACATTCACCTTCTTGGTCCCATAGCTCACCAAGCACTCCACAAGCTCTCAAACAGCTATGGACCCTTGATGTATCTCTTCATTGGCTCCATCCCTAATCTTATTATCTCATCGGCCGAGATGGCAAATGAGATTCTCAAATCCAATGAGCTCAACTTCCTCAACCGTCCCACAATGCAAAACGTTGACTACCTTACTTACGGCTCAGCGGATTTCTTCTCAGCCCCTTATGGGCTTCACTGGAAGTTCATGAAGAGAATCTGT…		MVDLQYFFVTILLCLGITVLIQAITNRLRNKLPLPPSPTALPIIGHIHLLGPIAHQALHKLSNSYGPLMYLFIGSIPNLIISSAEMANEILKSNELNFLNRPTMQNVDYLTYGSADFFSAPYGLHWKFMKRICMMELFSSRALDSFVSVRSEELRKLLNRILKKAEAEESVNLGEQLKELTSNIITRMMFREMQPDSDAGGKTEEVIKMLVELNELAGFFNVSETFWFLKRLDLQGLKRRLKNARDKYDLIIERIMKEHEYVKKKDAGARKMLDILLDIYEDKNAEIKLTRENIKAFIMNIYGGGTDTSAITVEWALAELINHPEIMKKAQQEIEQVVGNKRVVEESDLCNLSYIQAVVKETMRLHPGGPVFVRESDEECGVAGFRIPAKTRVIVNVWA…
Brassica napus	GSBRNA2T00078596001	BnaCYP93D1_C	ATGGCAAATGAAATTCTCAAATCCAACGAGCTCAACTTCTTGAACCGTCCAACAATGCAAAACGTTGACTACCTTACTTATGGCTCAGCTGATTTCTTCTCAGCGCCTTATGGGCTTCACTGGAACAGCAGAGCTATAGATAGCTTTGTTAATGTAAGAACCGAGGAGCTGAGTAAGCTTCTGGTGCGTGTTATGAAGAAAGCAGAAGCAGAAGAGAGTGTTGATCTTGGTGAACAGCTAAAGGAGTTGACAAGCAGCATCATAACGAGAATGATGTTCAGAGAAAGGAGATCGGATAGTGGGATAAGAGAGGAAGTTATCAAAATGGTGGTGGAGTTGAATGAGCTAGCAGGGTTCTTCAACGTGTCTGAAACGTTTTGGTTCTTGAGGAGACTTGAC…		MANEILKSNELNFLNRPTMQNVDYLTYGSADFFSAPYGLHWNSRAIDSFVNVRTEELSKLLVRVMKKAEAEESVDLGEQLKELTSSIITRMMFRERRSDSGIREEVIKMVVELNELAGFFNVSETFWFLRRLDLQGIKKRLKNARDKYDVIIERIMKEHESRNHMDAGGVRSMLDILLDIYEDKNSEMKLTRENIKGFIMNIYGGGTDTSAITVEWALSELINYPEIMKKARKEIEQVVGNKRLVQESDLCNLSYIQAVVKETLRLHPGGPIFVRESNEECAVAGYRIPAKTRVIVNVWAIGRDPNQWEDPLEFRPERFEGSEWKVMSEKMVSFGAGRRSCPGEKMVFRFVPLVLAAVIQCFELKVKGRVEMSEGSGSSLPRATPLVCVPVAREGIKSL…
Brassica napus	GSBRNA2T00119743001	BnaCYP93D1_A	ATGGCAAATGAAATTCTCAAATCCAATGAGCTCAACTTCTTGAACCGTCCAACAATGCAAAATGTTGACTACCTTACTTATGGCTCAGCTGATTTCTTCTCAGCGCCTTATGGGCTTCACTGGAACAGCAGAGCAATAGATAGATTTGCCAATGTAAGAACCGAGGAGTTGAGGAAGCTTTTGGTGCGTGTTATGAAGAAATCAGAAATAGAAGAGAGTGTTGATCTCGGTGAACAGCTTAAGGAGTTGACAAGCAGCATCATAACGAGAATGATGTTCAGAGAAAGGGGATCGGATAGTGGGAGAAGAGAGGAAGTTATCAAAATGGTGGTGGAGTTGAATGAGCTAGCAGGTTTCTTCAATGTTTCTGAAACGTTTTGGTTCTTGAGGAGACTTGAC…		MANEILKSNELNFLNRPTMQNVDYLTYGSADFFSAPYGLHWNSRAIDRFANVRTEELRKLLVRVMKKSEIEESVDLGEQLKELTSSIITRMMFRERGSDSGRREEVIKMVVELNELAGFFNVSETFWFLRRLDLQGIKKRLKNARERYDVIIERIMKEHESRNHKDAGGVRSMLDILLDIYEDKNSEIKLTRENIKGFIMNIYGGGTDTSAITVEWALSELINNPEIMKKAQQEIEQVVGDKRLVQESDLCNLSYIQAVVKETLRLHPGGPIFVRESNEECAVAGYRIPAKTRVIVNVWAIGRDPNQWEDPLEFKPERFEGSEWKVMSEKMVSFGAGRRSCPGEKMVFRFVPLVLAAVIQCFELKVKGRVEMSEGSGSSLPRATPLVCVPVAREGIKSL…
Eutrema salsugineum v1.0	Thhalv10013294m	EsaCYP93D1	ATGGCGGATTTACAATACTTCTTTGTAATCATTCTTCTTTGCCTTGGAATCACAGTCTTGATCCAAGCCATTGTTACCAAAAGATTCCGCAACAAACCACCGCTTCCACCAAGCCCAATAGCTTTACCGATCATCGGTCACATTCACCTACTTGGTCCCATAGCTCACCAAGCACTTCACAAGCTCTCAATCCGCTACGGACCTTTGATTTATCTCTTCATTGGCTCCATTCCTAATCTTATCGTCTCATCAGCTGAGATGGCGAATGAGATTCTCAAGTCCAATGAGCTCAACTTCCTGAACCGACCCAAAATGCAAAACGTTGACTACCTTACTTACGGCTCAGCAGATTTCTTCTCAGCGCCTTACGGGCTTCACTGGAAGTTCATGAAGAGGATT…		MADLQYFFVIILLCLGITVLIQAIVTKRFRNKPPLPPSPIALPIIGHIHLLGPIAHQALHKLSIRYGPLIYLFIGSIPNLIVSSAEMANEILKSNELNFLNRPKMQNVDYLTYGSADFFSAPYGLHWKFMKRICMMELFSSRALDSFVTVRREELKKLLIRVLKKAEAEESVDLGEQLKGLTSNIITRMMFRERQSDRDGCGKTEEVIKMVVELNELAGFFNVSETFWFLRRLDLQGLKKRLKNARDKYDVIIERIMEEHESKKNKDAGARNMLDILLGIHEDKNAEMKLTRENIKAFIMNIYGGGTDTSAITVEWALAELIDHPEIMKKAQQEIEKVVGNKRVVEESDLCNLSYIQAVVKETLRLHPGGPIFVRESDEECAVAGFRIPAKTRVIVNVW…
Phalaenopsis equestris v5.0	pe__PEQU_15686	PeqCYP93J1	ATGGAAGAACTCCTCCACTCCCCCTACCTCTCACTCCTCCTCCTCCCCCTCTGCTTTCTCATCCTCAACTTCTTCATCACCAGATCCCGCAAGACTCCCAAACCAATTCCTCTGAGTCCAACATCACTGCCCATCATCGGCCACCTCCACCTCCTCCACCCTCCCCTCCACCAATCCCTCCACCGCCTCACATCCCGCTACGGCCCCATCGTTAAACTCCGCCTAGGCTCCACTCCAGCCATCCTTGTCGGCTCCGCCGACGCCACAAAGGAACTCATCAAAACCCACGACCAAGACCTCGCCGACCGTCCGATCTTCACCGCTGTCCGTCACTTCGCCTACGAATCTTCCGGATTCGCGTTTGCCCCTTACGGCCCTTACTGGCGCTTCATGAAAAAG…		MEELLHSPYLSLLLLPLCFLILNFFITRSRKTPKPIPLSPTSLPIIGHLHLLHPPLHQSLHRLTSRYGPIVKLRLGSTPAILVGSADATKELIKTHDQDLADRPIFTAVRHFAYESSGFAFAPYGPYWRFMKKLCMSELLSSRTVDGLAYIRRRELLALLRTLAAKSAAAESIDLSKELIRMTTSVIAGMTTGTASAGDSEAARKAVKGVAEIIGSVNLGDFIGFLSIFDLQGLRKRMKEVRDNFDALMERIMASKEASRKSCGVGVDGNKDLLDILLDAAEDREMEIQLTTENIKSFILDVFTAGSDSSAATTEWALAELINHPEQLKKAREEIDNTVGKDRLIDESDIQNLIYLQAVVKETLRLHPAAPMAMRKATKEIKHGEFELRKGNTIIFNVY…
Brachypodium distachyon v2.1	Bradi2g48450.1	BdiCYP93G2	ATGGCAGGAGGCATGATGGAGCAAGTCGGCGGCGCCGTCTCCGACAGCGTGCTGGTCGTCTCCTTCCTCGCTGCGGCCGTCGTCCTCCTCCTGTTCACGCTGGTCAGACATGGCCGCACGCAGCAGGGCCGCCTGCCCCCAAGCCCCATGGCGCTCCCGCTCCTCGGCCACCTCCACTACCTCATCCGCGCCCCGCCCCACCGCGCATTCGACCGCATCATCGCCCGCTACGGGCCCCTCGTCTACCTTCGCCTCGGGCCTTCCACCCACTGCGTCGCCATCGGCTCCGCCGACGTCGCCCGCGACTTCCTCAAGTTCGAAGGCAGCATCCCGGAGCGGCCCCTGACTGCCGTCACGCGCACCCTGGCCTACGAGTCGGCCGGCTTCGCCTTCGCGCCC…		MAGGMMEQVGGAVSDSVLVVSFLAAAVVLLLFTLVRHGRTQQGRLPPSPMALPLLGHLHYLIRAPPHRAFDRIIARYGPLVYLRLGPSTHCVAIGSADVARDFLKFEGSIPERPLTAVTRTLAYESAGFAFAPYGPHWRFMKRLCMSELLGPRTIEQLRPVRAAELAGVMRAAAAAAEQGGTLDMSRELIRMSNNAIMRMVASSLPGDMADAARDCAKQVAELVGAFNVEDYVALCRGWDLQGLGRRTRDVHARFDALLEVMIKTKEKERGAADEADKGGSKTKDLLDILMDAAADKTAEVKLTRDNIKAFVLDIFTAGSDTTATTVEWMLAELLNHPACLAKLRAELDEVVGKSRLVGEPDVAQMPYLQAVLKETLRLRPPAVFAQRETIEPVHVRGY…
Brachypodium distachyon v2.1	Bradi5g02460.1	BdiCYP93G1	ATGGCAATGGCGGCGTCCAGCATGGAGCAGCTGCTGCAGGTCGACCCAGCAATGGCCACTTACTCCATCCTCGCCATCGCACTCGTCACAGCAGTTCTAGTCCTGATCAACAGAATCGGCGGCAACGGCGCCGGGAAGCAGCGGCGGCATGGTCTGCCGCCGAGTCCCCGGAGGCTGCCGGTGATCGGGCACCTCCACCTGCTCCGTCCCCCCGTGCACCGCACCTTCCAGGAGCTGGCTTCCGGCTTGGGCGCCCCGCTGATGCACATCCGGCTCGGCTCCACGCACTGCCTGGTGGCCAGCTCCGCCGCCGCCGCCACCGAGCTCATCCGCTCCCACGAGGGGAAAATCTCGGAGCGGCCACTGACGGCCGTGGCCCGGCAGTTCGCCTACGGCTCC…		MAMAASSMEQLLQVDPAMATYSILAIALVTAVLVLINRIGGNGAGKQRRHGLPPSPRRLPVIGHLHLLRPPVHRTFQELASGLGAPLMHIRLGSTHCLVASSAAAATELIRSHEGKISERPLTAVARQFAYGSDSGFAFAPYGPHWRAMKRLCMSELLGPRTVELLRPVRRAGLVSLLHTVIRKSPEPVDLTAELIRMSNASIIRMMASTVPGSVTEEAQALVKAVAELVGAFNVEDYIAVCRGWDLQGLGKRAADVHRRFDALLEDMIAHKEEARAAKKAIRGEDDQEPETKKTMAESKDLIDILLDKMEDENAAEETKLTREKIKAFTIDVVTAGSDTSAAMVEWMLAELMNHPECLRKVRDEIDAVVGSNRITGEADIANLPYLQAAYKETLRLRP…
Triticum urartu v1.0	tu__TRIUR3_21101	TurCYP93G1	ATGAAGCGCCTCTGCATGTCCGAGCTCCTCGGCCCCCGCACCGTCGAGCAGCTCCGCCCCGTCCGCCGCGCCGGCCTCGTGTCCCTACTGCAGAGCGTGCTGCACCGGGCGTCGGGTGCTGAGGCGGTCGACCTCACCGCCGCGCTCATCCGGCTGTCCAACACGTCCATCATCAGGATGATGGCCAGCACCGTGCCTGGGAGCGTCACGGAGGAGGCGCAGGCGCTGGTGAAGGCCGTGGCGGAGCTAGTCGGCGCGTTCAACGTCGAGGACTACATCGCCGTGTGCCGCGGCTGGGACCTCCAGGGCCTCCGCCGCCGGGCCGCCGACGTCCACCGCCGCTTCGACGCGCTGCTCGAGGAGATGATTCGGCACAAGGAGGAGGCCCGAGAGGCCAGG…		MKRLCMSELLGPRTVEQLRPVRRAGLVSLLQSVLHRASGAEAVDLTAALIRLSNTSIIRMMASTVPGSVTEEAQALVKAVAELVGAFNVEDYIAVCRGWDLQGLRRRAADVHRRFDALLEEMIRHKEEAREARKMRGGAEGETPEKKTATGTTTESSKDLLDILLDKLEDDAAAEVKLTRKKIKAFVIDVVTAGSDTSAAMVEWMLAELMNHPECLRKVREEVDAVEKELKR*
Panicum virgatum v1.1	Pavir.J20853.1	PviCYP93G7	ATGCAAATGGAAGAGCAGCAGGGCAGCAGCATGGTCGCCGATCCGGTGACCGCAGTCCTAGTGGCGCTGATCGCGGCCTTCACCACCGCCGTGGCCTTGCACCACCTCATCATCTCCCGGTGGAGCCTGCAGCAGGCCCTCCGGCTGCCACCGGGCCCGACGAGCCTCCCGGTGATCGGGCACCTCCACCTGCTCCGGCCGCCGGTCCACCGCACCTTCCAGGAGCTGGCGTCCCGCGCGGGCCCCCTGATGCACATCCGCCTGGGCTCCACGCACTGCGTGGTGGCGAGCACCGCCGACGTCGCCGGCGAGCTGATCCGCGGCCACGAGGGCAGCATCTCCGAGCGGCCGCTCACGGCGGTGGCGCGGCAGTTCGCCTACGGCTCGGCGGGCTTCGCC…		MQMEEQQGSSMVADPVTAVLVALIAAFTTAVALHHLIISRWSLQQALRLPPGPTSLPVIGHLHLLRPPVHRTFQELASRAGPLMHIRLGSTHCVVASTADVAGELIRGHEGSISERPLTAVARQFAYGSAGFAFAPYNAHWRFMKRLCMSELLGPRTVEQLRPIRRAGAVSLLRAARAAAARGEAVDLTRELIRLANTSVIRMVASTVPGSVTDEAQELVKAVAELVGAFNVDDYIALCRGWDLQGLRRRAAAVHRRFDALLEEILRHKEEAREARRLLDGDGDDHMKAKATTHKEDLLDILMDKAEDKTAEVKLTRDNIKAFIIDVVTAGSDTSAAMVEWMLAELMNHPEALRKVVAEIDAVVGGSRIAGEADLPQLPYLMAAYKETLRLHPAAPIAH…
Zea mays 6a	GRMZM2G148441_T01	ZmaCYP93G7	ATGGAAGAGCAGCAGCCCCGCCCCCGCCCAAGCATCATGTTCGTCCTGTCGTCGCTCGCCAAGAATAACCCAGAGTCCGTGCTGGCGCTCATCGCGGTGCTCACCGTCGTCGCCCTGCGCCACTTGATCTCCTCATGGCGGCAGCAGGCCCGGCTGCCCCCGTCACCGACGAGCCTCCCGGTGATCGGCCACCTGCACCTGCTCCGCCCGCCGGTGCACCGCACCTTCCAGGAGCTGGCGTCCCGGATCGGTCCGCTGATGCACATCCGCCTCGGCTCCACGCACTGCGTGGTTGCCAGCACCCCGGAGGTGGCCAGCGAGCTCATCCGCGGCCACGAGGGCAGCATCTCGGAGCGGCCGCTCACGGCGGTGGCCCGCCAGTTCGCGTACGACTCGGCC…		MEEQQPRPRPSIMFVLSSLAKNNPESVLALIAVLTVVALRHLISSWRQQARLPPSPTSLPVIGHLHLLRPPVHRTFQELASRIGPLMHIRLGSTHCVVASTPEVASELIRGHEGSISERPLTAVARQFAYDSAGFAFAPYNTHWRFMKRLCMSELLGPRTVEQLRPVRRAGTVSLLADLLASSARGETVDLTRHLIRLSNTSIIRMVASTVPGSVTDEAQEVVKDVAELVGAFNVDDYISLVRGWDLQGLRRRAAGVHRRFDALLEDILRHKEEARAARRLDQDDDGRGSSKQDKKQATHSKDLLDILMDKADDPAAEIKLTRENIKAFIIDVVTAGSDTSAAMVEWMLAELMNHPETLRKVAEEIDAVVGGDRIASEADLPQLPYLMAAYKETLRLHP…
Zea mays 6a	GRMZM2G167336_T01	ZmaCYP93G5	ATGGAAGCTGATGCTGCTGCTGCCAGTGGCGGCCTGGCCCTGCTGCCCGCCGTGCTGCTCCTCGTGGCGCTCTCCACCCTCGTCTTCTCCACATGGAGCAACCGCAACAGCAGGCTGCCCCCGAGCCCGATGGCCCTCCCGCTGATCGGACACCTGCACCTCATCCGCCCGCCGCCGCACAGGGCCTTCGACCGCATCCTGGCACGCTACGGGCCGCTCGTCTACCTCCGCCTCGGGCCCTCCACGCACTGCGTCGTCGCGGGCACCGCGGACGCCGCGCGGGACCTCCTCAAGCACGAGGCCAGCATCCCGGAGCGGCCGCTCACGGCCGTCACGCGCCACCTCGCCTACGACGACGCCGGCTTCGCCTTCGCGCCCTACGGCCCGCACTGGCGCTTC…		MEADAAAASGGLALLPAVLLLVALSTLVFSTWSNRNSRLPPSPMALPLIGHLHLIRPPPHRAFDRILARYGPLVYLRLGPSTHCVVAGTADAARDLLKHEASIPERPLTAVTRHLAYDDAGFAFAPYGPHWRFMKRLCMSELLGPRTVDQLRPVREAELAAVLEAARQAAAAREPIDVSRHLISMSNNAIMRMVASALPGHMTEAARDCAKHVAELVGAFNVEDYVGLCRGWDLQGLTRRTREVRDKFDALLEIMITGKEESRRRRHATTDTGGGTKDLLDILMDAAEDANAEVRLTRENIKAFVLDIFTAGSDTTATSVEWMLALLINHPACMDKLRAELDAVVGASRLVGEQDVPRLPYLQAVFKETLRLQPPAVFAQRETIEPVHVRGYVIPPKTS…
Zea mays 6a	GRMZM2G329029_T01	ZmaCYP93G11	ATGGCCATGGACCTGCTAGCAATGCCAGTGCTCCTGTCCGCCGACTCAGCAGCCGCCGTCTTGGTGCTCCTTTCCGTGGCCACAGTTGTTGCCCTGAAGCACTTGCTCTCGTCATGGCGACGATCTCCTCGGCGGCGGCTTCCCCCGAGCCCGACGCCCCTCCCGGTGATCGGTCACCTCCACCTGCTGCGGCCACCGGTGCACCGCACTTTCCACGAGCTCGCAACACGGCTAGGGGCGCCCCTCATGCACATCCGCCTCGGCTCCACGCACTGCGTCGTGGTGGGCTCGGCCGACGTGGCTAGGGAGCTCATCCACGACCACGATGCCACCATCTCGGGACGGCCAGTTTCGGTGCTGTCCCGGCTCTTCTCCTACGGCTCGGCCGGCTTCGCCTTC…		MAMDLLAMPVLLSADSAAAVLVLLSVATVVALKHLLSSWRRSPRRRLPPSPTPLPVIGHLHLLRPPVHRTFHELATRLGAPLMHIRLGSTHCVVVGSADVARELIHDHDATISGRPVSVLSRLFSYGSAGFAFTPYSPHWRFLRRLCVSEVLGPRTVEQLRHVRRGSLVSLLRSVLASSARGDNKVDLTRELIRFSTTSIIRMVASDVGVTDEAQELVKGVAELLGAFNLEDYVPLCRGWDLQGLRRKANGVHRRFDAVLEQMIRHKEEARDRERSRGGAAQEDKKGWPATCKQRNKDLLDILLDMAENETAEVKLTRENMKAFIVDVVTAGSDSSAATVEWMLAELMNHPEALRKVRAEIDAVVGADRIVGEEDLPRLPYLQATFKETLRLHPGAPIA…
Zea mays 6a	GRMZM2G335323_T01	ZmaCYP93G10P	ATGGACAAGGCGGAGGACCAGGCGGCGGAGGACGTGGTGACTGCTGGTTCAGACACGTCGGCCGCCATGGTAGAGTGGATGCTGGCGGAGCTGATGAACCACCAGGAGACGCTGCGCAAGGTGGTGGAAGAGATCGACGCGGTGGTCGGCGGCGACAGGATCGCCAGCGAGGCGGACTTGCCGCGGCTGCCGTACCTGATGGCTGCGTACAAGGAGACGCTGCGTCTGCACCCAGCGGCGCCCATCGCGCACCGACAGTCGTCGGAGGAGATGGTGGTGCGCGGCTTCACGGTGCCGCCGCAGACGGCGGTGTTCATCAACGTGTGGGCCATCGGGCGCGACCCGGCGTACTGGGAGGAACCCCTAGCGTTCCGGCCGGAGCGATTCATGCCCGGCGGC…		MDKAEDQAAEDVVTAGSDTSAAMVEWMLAELMNHQETLRKVVEEIDAVVGGDRIASEADLPRLPYLMAAYKETLRLHPAAPIAHRQSSEEMVVRGFTVPPQTAVFINVWAIGRDPAYWEEPLAFRPERFMPGGAAESLEPRGQHFQYMPFGSGRRGCPGMGLALQSVPAVLAALVQCFHWATVDGDGGVNKIDMSESDGLVCARKKPLLLRPTPRLTPFPAVV*
Zea mays 6a	GRMZM2G407650_T01	ZmaCYP93G6	ATGCACATCCGCCTTGGCTCCACAAACTGCGTGGTGGCCAGCAGCCCAGAGGTGGCCAGCGAGCTCATCCGCGGCCACGAGGGCAGCATCTCGGCGCGGCCGTTTACGGCAGTGGCCCGCAAGTTCTCCTACGACTCCGCCGGCTTCGTCTTCGAGCCCTACAACACGCACTGGCGCTTCATGAAGCGCCTCTGCATGTCGGAGCTACTCGGCCCACGCACCGTCGAGCAGCTGCGCCCCGTCCGCCGCGCTGTCACCGTGTCCCTGGTCTCCGACCTGCTGGCGTCGTCGGCGCGCGGGGAGACGGTGGACATCACCCGCCATCTCATCCGCCTCACAAACACCTCCATCATCCGGATGGTGGCCAGCACCGTGTCCGGCAGCGTCACCGACGAGGCG…		MHIRLGSTNCVVASSPEVASELIRGHEGSISARPFTAVARKFSYDSAGFVFEPYNTHWRFMKRLCMSELLGPRTVEQLRPVRRAVTVSLVSDLLASSARGETVDITRHLIRLTNTSIIRMVASTVSGSVTDEAHELAKAVIEVVGAFNVDDYIAVVRGWDFQGLGRKAADVHRRFDALLEDILRHKEEARAARRLDDGHGKQATHSKDLLDILMDKAEDPAAEVKLTRENIKAFVIDVVTSGSDTSAAMAEWMLAELMNHPETLRKVVEEIDAVVGGGRIASEADLPQLPYLMAVYKETLRLHPAGPIAHRQSTEEMVVHGFTVPPQSTVLIHVWAIGRDPAYWEEPLLFRPERFMPGGAAESLEPRGKHFQYIPFGSGRRGCPGMGLAMQSVPAVVAA…
Sorghum bicolor v2.1	Sobic.001G366500.1	SbiCYP93G4	ATGGAAGCAGCAGCAGCTGCTGCTGCCAGCGGCGGCGGCGGTGACCTGGCCCTACTCCCCGGCGTCCTGCTCCTCCTGGCGCTCTCCACCTTCGTCGTCATCTCCAGATGGAGCAACCGCAGCAGCAGGAGGCTGCCCCCGAGCCCGATGGCGCTCCCGCTCATCGGCCACCTGCACCTCATCCGCCCGCCGCCGCACAGGGCCTTCGACCGCATCCTGGCGCGCTACGGTCCCCTCGTCTACCTCCGCCTCGGGCCCTCCACGCACTGCGTCGTGGCCGGCACCGCCGACGCCGCCCGGGACCTCCTCAAGCACGAGGCCAGCATCGCGGAGCGTCCGCTCACGGCCGTCACGCGCCACCTCGCCTACGACGACGCCGGCTTCGCGTTCGCGCCCTAC…		MEAAAAAAASGGGGDLALLPGVLLLLALSTFVVISRWSNRSSRRLPPSPMALPLIGHLHLIRPPPHRAFDRILARYGPLVYLRLGPSTHCVVAGTADAARDLLKHEASIAERPLTAVTRHLAYDDAGFAFAPYGPHWRFMKRLCMSELLGPRTVDQLRPVREAELAAVLAAARRAADNGEAIDVSRHLISMSNNAIMRMVASALPGHMTEAARDCAKHVAELVGAFNVEDYVALCRGWDLQGLTRRTREVRDKFDALLEIMITGKEENRRRQHGQGHSTTTADKNISKDLLDILMDAAEDVNAEVKLSRENIKAFVLDIFTAGSDTTATSVEWALALLINHRSCMDKLRAELDAVVGASRLVGEQDVARLPYLQAVFKETLRLQPPAVIAHRETIEPVH…
Sorghum bicolor v2.1	Sobic.002G000400.1	SbiCYP93G3	ATGGAAGCAGCAGAAGCTGTCACTGTGGGTGTGGGGGGCAGCATCGGCGCCCCTTCCGCGCCCGGCGGCGTCCTGCTCCTCTTCCTCCTCGCGCTCTCCACCCTCATCATCATCATCAGATGGAGATGGAATAATAACCGCAACAGCAGGCTGCCCCCTAGCCCGATGGCGCTCCCGCTCGTCGGCCACCTGCACCTCATCCGGTCGCCGCCGCACAGGTCCTTGGACCGCATCGTGAAGCGCTACGGGCCCCTCGTCTACCTCCGCCTCGGCCCCTCCACGCACTGCGTCGTCGCCGGCACCGCGGACGCCGCACGGGACCTCCTCAAGCACGAGGCCAGCATCCCGGAGCGGCCGATCACGGTCGTCGCGCACCACCTCGCCTATGGCGACGCCGGC…		MEAAEAVTVGVGGSIGAPSAPGGVLLLFLLALSTLIIIIRWRWNNNRNSRLPPSPMALPLVGHLHLIRSPPHRSLDRIVKRYGPLVYLRLGPSTHCVVAGTADAARDLLKHEASIPERPITVVAHHLAYGDAGFAFAPYGAHWRFMKRLCMSELLGPRTVDQLRPVREAELAAVLGAARQASASGERIDVSRYLISMSNNAIMRMVASALPGHMTEAARDCAKHVAELVGAFNIEDYVGICRGWDLQGITRRTREVRDKFDALMEIMITAKEEKRRSQGDDGAETPTKDLLDILMDAAADENAEVRLTRENIKAFVIDIFTAGSDTTATSVEWMLAYLINHPACMDKLRAELDAVVGTSRLVGENDVPRLPYLQAVFKETLRLQPPAVFSQRETIEPVH…
Sorghum bicolor v2.1	Sobic.006G001000.1	SbiCYP93G7	ATGGCGGCCATGGAAGAGCAGCCGCTGAGCTCCAGCAGTACCAGCATGGCCATCGTCCTGTCGCTCTTGAAGAACAACCCAGCTGATGCCGTCCTGCTGGCACTGGTCGCCGTCGTGGCCTTGCGCCATTACTTGATCTCGTCATGGCGGCAGCAGGAGCAGGCCCGCCGGCTGCCCCCGGGCCCAAGGAGGCTCCCGGTGATCGGGCACCTGCACCTGCTCCGGCCGCCGGTGCACCGCACCTTCCAGGAGCTGGCGTCCCGGATGGGTCCCCTGATGCACATCCAGCTGGGGTCCACGCACTGCGTGGTGGCCAGCTCCCCGGAGGTGGCCAGCGAGCTGATCCGCGGCCACGAGGGCAGCATCTCGGAGCGGCCGCTCACGGCGGTGGCCCGGCAG…		MAAMEEQPLSSSSTSMAIVLSLLKNNPADAVLLALVAVVALRHYLISSWRQQEQARRLPPGPRRLPVIGHLHLLRPPVHRTFQELASRMGPLMHIQLGSTHCVVASSPEVASELIRGHEGSISERPLTAVARQFAYDSAGFAFAPYNTHWRFMKRLCMSELLGPRTVEQLRPIRRAGTVSLLGDLLLAAASSETETETVVDLTRHLIRLSNTSIIRMVASTVPGSVTDEAQELVKAVAELVGAFNADDYIAVIRGWDLQGLRRRAADVHRRFDALLEDILKHKEEARAARRRLDDDDGHRVSKKQATAPHSKDLLDILMDKAEDPAAEVKLTRENIKAFIIDVVTAGSDTSAAMVEWMLAELLNHPETLRKVVEEIDAVVGGDRIASEADLPQLPYLMA…
Setaria italica v2.1	Si009775m	SitCYP93G7	ATGCTGGTGGTGAGCATGGAAGAGCATCCAATGGGCGCCGTAGTCCTGGCGCTCATTATTGCGGCCGTCGCCGCCGTGTCCTTGCAGCACCTCATCTCCCGGCGAGCCTCCCGTCGTCTTCCCCCTGGCCCGACTAGCCTCCCAGTGATCGGGCACCTCCACCTGCTCCGGCCGCCGGTGCACCGCACCTTCCAGGAGCTGGCTGCCCGGGTGGGGCCCCTGATGCACATCCGCCTGGGGTCCACGCACTGCGTCGTGGCGAGCACCGCGGAGGTGGCGAGCGAGCTGATCCGCAGCCACGAGGGGAGCATCTCGGAGCGGCCGCTCACGGCGGTGGCCCGGCAGTTCGCCTACGGCTCCGCCGGCTTCGCCTTCGCCCCCTACAACACCCACTGGCGC…		MLVVSMEEHPMGAVVLALIIAAVAAVSLQHLISRRASRRLPPGPTSLPVIGHLHLLRPPVHRTFQELAARVGPLMHIRLGSTHCVVASTAEVASELIRSHEGSISERPLTAVARQFAYGSAGFAFAPYNTHWRFMKRLCMSELLGPRTVEHLRPVRRAGTVSLLRAALAAASSPAAEPFDLTRELIRLSNTSIIRMVASTVPGSVADEAQELVKDVAELVGAFNADDYIALCRGWDLQGLRRRAAAVHRRFDALLEEILRHKEDAREARKLLMLDDDGDDGRKKEAATATMHKDLLDILMDKAEDKTAEVKLTRDNIKAFIIDVVTAGSDTSAAMVEWMLAELMNHPEALRNVVAEIDAVVGGDRIAGEADLPRLPYLIAAYKETLRLHPAAPIAHRQS…
Setaria italica v2.1	Si019506m	SitCYP93G11	ATGGAGACGGAGCAGCCACTGCCCATACTCCTGTCCGCCGATTCAGTAGCCGTCCTGGCCGTGGGCACCCTTCTTGCTCTTGCCCTGAACCACTTGGTCTCGTCATGGCGATCTGCTCGTCGTCTTCCCCCGAGCCCGCCGGGCCTCCCGGTGATCGGCCACCTCCACCTGCTGCGGCCGCCGGCGCACCGCACCTTCCACGAGCTCGCGGGAAAGCTCGGGCCCCTCATGCACATCCGCCTCGGCTCCACGCACTGCGTCGTGGCCGGCTCGGCCGACGTCGCTAGGGAGCTCATCCACCGCCACGACGCCGCCATCTCGGGGCGGCCGGTCACGGCGCTGGCCCGGCTCTTCTCCTACAGCTCCGCCGGCTTCGCCTTCACCCCCTACAGCCCACGG…		METEQPLPILLSADSVAVLAVGTLLALALNHLVSSWRSARRLPPSPPGLPVIGHLHLLRPPAHRTFHELAGKLGPLMHIRLGSTHCVVAGSADVARELIHRHDAAISGRPVTALARLFSYSSAGFAFTPYSPRWRFLRRLCVSEVLSPRTVEQLRPVRRAALAPLLRAVLAASERGEAADVTGELVRFANASIIRMVASDAPGSVADEAQGLVKAVTELIGAFNVEDYVPLCRGWDLQGLRSTAAGVHRRFDALLEQMIRHKEEARERGRSCGAIYELEHEQEDEKGSAPATRKRNKDLLDILLEKAEDEAAEVKLTRENIKAFITDVVTAGSDSSAATVEWMLAELVNHPEVMRKVREEIDAVVTGDCRIVGEADLPRLPYLQAAFKETLRLHPGAPI…
Setaria italica v2.1	Si020689m	SitCYP93G13	ATGGAGGCCGCCGCTGCTGTGGCCGCCCTCCTGCTCCTCCTCGCACTCTCGGCGGCGCTCGTCAGCAGGAGGAGGAGCGGTAGCCACCGGTTGCCCCCGAGCCCGATGGCTCTCCCGCTGATCGGCCACCTGCACCTGATCCGCCCGCCGCCGCACCGGGCCTTCGACCGCATCCTGGCGCGCTACGGGCCCCTCGTGTACCTGCGCCTCGGCCCCTCCACGCACTGCGTCGTCGCCGGCACCGCCGACGCCGCGCGCGACCTCCTCAAGTTCGAGGCCAGCATCCCGGAGCGGCCGCTGACGGTGGTGACGCGCCACCTGGCCTACGACGACGCCGGCTTCGCCTTCGCGCCCTACGGCCAGCACTGGCGCTTCATGAAGCGCCTCTGCATGTCGGAG…		MEAAAAVAALLLLLALSAALVSRRRSGSHRLPPSPMALPLIGHLHLIRPPPHRAFDRILARYGPLVYLRLGPSTHCVVAGTADAARDLLKFEASIPERPLTVVTRHLAYDDAGFAFAPYGQHWRFMKRLCMSELLGPRTVEQLRPVREAELAAVLRAARDAAARGEAVDVSRHLISMSNNAIMRMVASALPGHMTEAARDCAKHVAEVVGAFNLEDYVGICRGWDLQGLTRRTREVRDKFDALMEIMITAKEEARRSPAAAGQQKAATKDLLDILMDAAEDQNAEVKLTRENIKAFILDIFTAGSDTTATSVEWMLSHLINHPACLDRLRAEVDDVVGGARLVGEHDVARLPYLQAVFKETLRLQPPAVFAQRETIEPVHVRGYTIPPKTSVFFNIFSI…
Hordeum vulgare v1.0	MLOC_58102.1	HvuCYP93G2	ATGGAGCAATTCGGAGTGGTCTCGGACAGTGCAGCGCCACTGCTTGTGGCCTCGCTCCTCGCCGCCGTGGCCTTCTTCCTCCTCACGCTGGTCAGACATGGCGGCAAGCACGGCCGCCTCCCCCCGGGCCCCATGGCGCTCCCCTTCATCGGCCACCTCCACCTCATCCGCCCGCCCCCCCACCGCGCGTTCGACCGCATCATCAACCGCTACGGCCCGCTCGTGTACCTCCGCCTCGGCCCCTCCACCCACTGTGTCGTCATCGGCTCCGCCGACGTCGCCCGCGACGTCCTCAAGTTCGAGGGCAGCATCCCGGAGCGCCCGCTCACGGCGGTCACGCGGCACCTCGCCTACGACTCGGCCGGCTTCGCCTTCGCGCCCTACGGCCCGCACTGGCGC…		MEQFGVVSDSAAPLLVASLLAAVAFFLLTLVRHGGKHGRLPPGPMALPFIGHLHLIRPPPHRAFDRIINRYGPLVYLRLGPSTHCVVIGSADVARDVLKFEGSIPERPLTAVTRHLAYDSAGFAFAPYGPHWRFMKRLCMSELLGPRTIEQLRPVRAAELVGVMQAVTEAAAKGETLDMSRQLVRMSNNAIMRMVASELPGDMADAARDCAKKVAELVGAFNLEDYVALCRGWDLQGLDRKTRDVRARFDALFESMIKAKEKQRREEADETETKTKDLLDILMDAAADPAAEVKLTRDNIKAFILDIFTAGSDTTATTVEWMLAELLNHPDCLQKLRAELDAVVGRSRVVGEPDVAQMPYLQAVLKETLRLRPPAVFAQREAIEPIHVRGYTIPVKTSV…
Oryza sativa v7.0	LOC_Os04g01140.1	OsaCYP93G1	ATGGCATCGTTGATGGAAGTGCAGGTGCCGCTGTTGGGAATGGGCACTACGATGGGCGCCCTGGCTCTGGCTCTCGTCGTCGTTGTGGTTGTGCACGTTGCCGTGAACGCCTTTGGGCGGCGGCGGCTTCCCCCGAGTCCGGCGAGCCTACCGGTGATCGGGCACCTTCACCTGCTCCGGCCGCCGGTGCACCGCACCTTCCACGAGCTGGCGGCGAGGCTGGGCCCCCTGATGCACGTCCGGCTGGGGTCGACGCACTGCGTTGTGGCGAGCTCGGCGGAGGTGGCGGCGGAGCTGATCCGCAGCCACGAGGCGAAGATATCGGAGCGGCCGCTGACGGCGGTGGCCCGGCAGTTCGCGTACGAGTCGGCGGGGTTCGCGTTCGCGCCCTACAGCCCG…		MASLMEVQVPLLGMGTTMGALALALVVVVVVHVAVNAFGRRRLPPSPASLPVIGHLHLLRPPVHRTFHELAARLGPLMHVRLGSTHCVVASSAEVAAELIRSHEAKISERPLTAVARQFAYESAGFAFAPYSPHWRFMKRLCMSELLGPRTVEQLRPVRRAGLVSLLRHVLSQPEAEAVDLTRELIRMSNTSIIRMAASTVPSSVTEEAQELVKVVAELVGAFNADDYIALCRGWDLQGLGRRAADVHKRFDALLEEMIRHKEEARMRKKTDTDVGSKDLLDILLDKAEDGAAEVKLTRDNIKAFIIDVVTAGSDTSAAMVEWMVAELMNHPEALRKVREEIEAVVGRDRIAGEGDLPRLPYLQAAYKETLRLRPAAPIAHRQSTEEIQIRGFRVPAQT…
Oryza sativa v7.0	LOC_Os06g01250.1	OsaCYP93G2	ATGGAGGAAGGCGTCGTCGGTGGGGGCGGCGCTGCCGTTCTTGTTGCCTTGCTCGTGACCGTGGTGTTGGCGGTGATGAGGTCAGCTGGAAGCAGAAGCAGCAAGCGCGGTCGGCTGCCCCCGAGTCCCATGGCGCTGCCCATCATCGGCCACCTCCACCTCATCCGGCCGCCACCCCACCGCGCCTTCGACCGCATCCTCGCCCGCCACGGGCCCCTCGTCTACCTCCGCCTCGGGCCCTCCACGCACTGCGTCGTGATCGGCTCGGCCGACGTGGCGCGCGACTTCCTCAAGTTCGAGGCCAGCATCCCAGAGCGGCCGCCCACGGCGGTGACGCGACAGCTGGCGTACGGCAAGGCCGGGTTCGCGTTCGCGCCCTACGGGGCCTACTGGCGGTTC…		MEEGVVGGGGAAVLVALLVTVVLAVMRSAGSRSSKRGRLPPSPMALPIIGHLHLIRPPPHRAFDRILARHGPLVYLRLGPSTHCVVIGSADVARDFLKFEASIPERPPTAVTRQLAYGKAGFAFAPYGAYWRFVKRLCMSELLGPRTVELLRPVRAAELADVLRAAQSAAERGEGVDMSHELVRMANNSIMRMVASALPGEMAEAARDCAKQVAELVGAFNAEDFVAVCRGWDLQGIGRRTNEVHARFDALLETIIEAKEEARRRSLRLGRRESSSKDLLDMLMDAAEDDTAEVKLTRDNIKAFVLDIFTAGSDTTATTVEWMLAELVNHPECMAKLRGELDAVVGRSRLVGEQDVARLPYLQAVLKETLRLRPPAVFAQRVTVEPVQVRGYTIPTDTQ…
Panicum virgatum v1.1	Pavir.J21069.1	PviCYP93F10	ATGGAAGTGGCCGCCGCCGCACGAGACCTCCTCGCCCCCGGCGCCCTCCCCGCCCTCCTCCTCCTCCTCGCCGCCCTCTACGCGCTGCGCCGCCGCGCCGGCGGCGGCCTCCGCCTCCCGCCGAGCCCGCTGGCGCTGCCCTTCCTGGGCCACCTCCACCTCCTGGCCCCGCTCCCGCACCAGGCGCTGCACCGCCTCGCCGCGCGCCACGGCCCGCTCCTCTACCTCCGCCTGGGCTCCGTGCCCGCCGTCGCCGCCTGCTCCCCGGACGCCGCCCGCGAGGTGCTCAAGACCCACGAGGCCGCGTTCCTCGACCGCCCCAAGCCGGCGGCGGTGCACCGCCTCACGTACGGCGGGCAGGACTTCTCCTTCTCGGCGTACGGGCCCTACTGGCGCTTC…		MEVAAAARDLLAPGALPALLLLLAALYALRRRAGGGLRLPPSPLALPFLGHLHLLAPLPHQALHRLAARHGPLLYLRLGSVPAVAACSPDAAREVLKTHEAAFLDRPKPAAVHRLTYGGQDFSFSAYGPYWRFMKRACVHELLAGRTLERLRHVRREEVARLVAALARSAAGGAAVDVNAALMGLTGDVVSRMVMSRRWTGDDVDTEEMRAVVAETAELTGVFNLQDYIGVFKHWDVQGLGKRIDAVHRKFDAMMERILTARDAERRRRREEEAAGGEGEAGAKDVLDMLFDMHEDEAAEMRLTRDNIKAFMLVRPWRL*
Panicum virgatum v1.1	Pavir.J27072.1	PviCYP93F13	CAGGACATCTTCGCGGCCGGCACGGACACGACGACGATCACGCTGGAGTGGGCGCTGTCGGAGCTGATCAACAACCCGGCCGTGCTTCGCCGCGCGCAGGCGGAGGTGGACGCCGTCGTGGGCGCGTCCCGGCTCGCCGACGAGTCGGACGTCCCCAACCTCCCCTACCTGCAGGCCGTCGCCAAGGAGACGCTCCGCCTCCACCCGACGGGCCCGCTGGTGGTGCGCCGCTCCCTGGAGCCCTGCAAGGTCTCCGGCTACGACGTCCCCGCCGGCGCGACGGTGTTCGTGAACGTGTGGGCGATCGGGCGCGACCCGGCGAGCTGGGCGCCCGACCCGCTGGCGTTCCGGCCGGAGCGGTTCCTGGAGGGCGGGAGCGCCGCCGGGGCGGACGTGCGC…		QDIFAAGTDTTTITLEWALSELINNPAVLRRAQAEVDAVVGASRLADESDVPNLPYLQAVAKETLRLHPTGPLVVRRSLEPCKVSGYDVPAGATVFVNVWAIGRDPASWAPDPLAFRPERFLEGGSAAGADVRGGHFHLLPFGSGRRICPGAGLAMLVVQAALAAMVQCFEWEPVGGAPVDMEEGPGLTLPRKRPLVCTVKARFDPMPALAADEGAAAAAAGEE*
Zea mays 6a	GRMZM2G013956_T01	ZmaCYP93F6	ATGGAAGTGGTCACAGCACGAGAACTCATCAACCCCACAGGCCTCCCCATTCTCCTCCTCGTTGCCGGCCTCACCGTTTTCTTTGTGCTGCGCCGCCGCAGCAGTGGCGGGCTTCGGCTCCCTCCGAGCCCGTTCGCTCTGCCCGTCCTGGGCCACCTGCACCTCCTGGCCCCGCTCCCGCACCAGGCGCTGCACCGCCTGGCAGCCCGCCACGGCCCGCTCTTGTACCTCCGCCTCGGCTCCATGCCGGCCATCGCCGCCTGCTCCCCGGACGCCGCCCGCGAGGTGCTCAAGACCCACGAGGCCGCGTTCCTGGACCGCCCCAAGCCCACGGCGGTGCACCGCCTGACGTACGGCGGGCAGGACTTCTCCTTCTCGCCGTACGGGCCCTACTGGCGC…		MEVVTARELINPTGLPILLLVAGLTVFFVLRRRSSGGLRLPPSPFALPVLGHLHLLAPLPHQALHRLAARHGPLLYLRLGSMPAIAACSPDAAREVLKTHEAAFLDRPKPTAVHRLTYGGQDFSFSPYGPYWRFMKRACVHELLAGRTLERLRHVRREEVSRLVGSLSRSACDGAAVDVDAVLMGVTGDIISRMVMSRRWTGDDSTTEEMRSLVAETAELTGTFNLQDYIGMFKHWDVQGLGKRIDAVHRKFDAMMERILTARDAERRCRRKASADGAGEGDKKDLLDMLFDMHEDEGAEMRLTRDNIKAFMLDIFAAGTDTTTITLEWALSELINNPAVLRRAQAELDAAVGASRLADESDIPRLPYLQAIAKETLRLHPTGPLVVRRSMAPCNVSGY…
Sorghum bicolor v2.1	Sobic.010G191600.1	SbiCYP93F7	ATGGAAGTGGCCACATCACGAGAACTCATCAACCCCACAGCCTTCCCCATTCTCGTCCTCGTTGCCGGCCTCACCACCGTTTTCTACGTGCTCCGCCGCCGGTGCAGCGGCAATGGCGGCCTTCGCCTCCCTCCGAGCCCGTTGGCGCTGCCCGTCCTGGGCCATTTCCACCTCCTTGCCCCGCTCCCCCACCAGGCGCTGCACCGGCTGGCGTCCCGGCACGGCCCGCTCCTGTACCTCCGCCTCGGCTCCATGCCGGCCATCGCCGCCTGCTCCCCGGACGCCGCCCGCGAGGTGCTCAAGACCCACGAGGCGGCGTTCCTCGACCGCGCCATGCCCACGGCGGTTCACCGCCTGATGTACGGCGGGCAGGACTTCATCTTCTCGGCGTACGGGCCC…		MEVATSRELINPTAFPILVLVAGLTTVFYVLRRRCSGNGGLRLPPSPLALPVLGHFHLLAPLPHQALHRLASRHGPLLYLRLGSMPAIAACSPDAAREVLKTHEAAFLDRAMPTAVHRLMYGGQDFIFSAYGPYWRFMKRACVHELLDGRTLERLRHVRREEVSRLVRSLSRSAGDDGAAVDVDAVLMGVTGDIVSRMVMSRRWTGDDSATDTEEMRSVIAETAVLTGTFNLQDYIGVFKYWDMQGLGKRIDAVHRKFDAMMERILTARDAQRRRRRKEPADGAGEGAKKDLLDMLFDMHEDEAAEMRLTRDNIKAFMLDIFGAGTDTTAITLEWALSELINNPDILRRAQAELDAIVGASRLADESDIPRLPYLQAIAKETLRLHPAFPLVVRRSTEP…
Sorghum bicolor v2.1	Sobic.010G191700.1	SbiCYP93F8	ATGGAAGTGACCACGGCACGAGATCAGCTCGTCATCAACCCCACGGCTCTCCCCATTCTACTCCTCGTTGCCGGCCTCACCGTCCTCTACATGCGGAGCCGCCGGGGCAGCGCCAACGGCGGCCTTCGCCTCCCCCCGAGCCCATTCGCGCTGCCCGTCCTAGGCCACCTCCACCTCCTAGCCCCGCTACCACACCAGGCGCTGCACCGGCTGGCAGCCCGCCACGGGCCGCTCCTGTACCTTCGCCTCGGCTCCGTGCCGGCCATCGCCGCCTGCTCCCCGGACGCCGCCCGCGAGGTGCTCAAGACCCACGAGGCGGCGTTCCTGGACCGCCCAAAGCCCACGGCGGTGCACCGCCTGACGTACGGCGGGCAGGACTTCTCCTTCTCGCCGTACGGT…		MEVTTARDQLVINPTALPILLLVAGLTVLYMRSRRGSANGGLRLPPSPFALPVLGHLHLLAPLPHQALHRLAARHGPLLYLRLGSVPAIAACSPDAAREVLKTHEAAFLDRPKPTAVHRLTYGGQDFSFSPYGPYWRFMKRACVHELLAGRTLDRLRHVRREEVSRLVRSLSRSAADGGGAPVDLNAVLMGVTGDIISRMVMSRRWTGDDSATEEMRSVVAETAEITGVFNLQDYIGVFKHWDVQGLGKRIDAVHRKFDAMIERILTARDAERQQRRRHKEAADGAAGEGDKKDLLDMLFDMHEDEAAEMQLTRDNIKAFMLDIFAAGTDTTTITLEWALSELINNPAVLRRAQAEVDAVVGASRLADESDIPRLPYLQAIAKETLRLHPTGPLVVRRS…
Setaria italica v2.1	Si008327m	SitCYP93F9	ATGGAAGAAGTAGTGGCCGCGGCACGAGGCCTCCTCCTCACCCCCACCGCCCTCCTCCTCGTCGCCGGCCTCATCACCGTCCTCTACGCGCTGCGCCGCCGCCGCGGCGGCGGCGGCGGCCTCCGCCTCCCGCCGAGCCCCTACGCACTGCCCTTCCTGGGCCACCTCCACCTCCTCGCCCCCCTCCCGCACCAGGCGCTTCAACGCCTGGCGGCGCGCCACGGCCCGCTCCTCTACCTCCGCCTGGGCTCCGTCCCCGCCGTCGCCGCCTGCTCCCCGGCCGCCGCCCGCGAGGTGCTCAAGACCCACGAGGCCGCGTTCCTCGACCGCCCAAAGCCGGCGGCGGTGCACCGCCTCACGTACGGCGGCCAGGACTTCTCCTTCTCGGCGTACGGGCCC…		MEEVVAAARGLLLTPTALLLVAGLITVLYALRRRRGGGGGLRLPPSPYALPFLGHLHLLAPLPHQALQRLAARHGPLLYLRLGSVPAVAACSPAAAREVLKTHEAAFLDRPKPAAVHRLTYGGQDFSFSAYGPYWRFMKRACVHELLAGRTLDRLRHIRREEVARLVASLSRSAAAAGEAVDVDAALMGLTGDIVSRMVMSRRWTGEEDGDTEQMRTVVAETAELTGTFNLQDYIGVFKHWDVQGIGKRVDAVHRKFDAMMERILTARDAERRRRREEDGAGEVGAKDVLDMLFDMHEDEAAEMRLNRDNIKAFMLDIFAAGTDTTTITVEWALSELINNPSVLRRAQAELDAVVGTSRLADESDVPNLPYLQAIAKETLRLHPTGPLVVRRSMEPCRV…
Hordeum vulgare v1.0	MLOC_64412.1	HvuCYP93F1	ATGGACAAAGCTAGAACCAGCAGATCTAGGCAGGCCAGTCAACTCCGCTCCATCGTCAGCATGGAGATGGCGCTGGCAGCACGGGACCTGTTCACTCCCGCCGGCACCAGCGTACCGCTCCTTCTGCTCGTCGCCGGCCTCACCGCCGTCCTGTACGCCGTGACCCGCCACAGGAGCGGCGGGCTGCGCCTCCCGCCCAGCCCATTCGGCCTGCCCATCCTCGGCCACCTCCACCTCCTCGTGCCGCTGCCGCACCAGGCGCTGCACCGCCTGGCCGAGCGCCACGGCCCGCTCCTCTACCTCCGTCTCGGCTCCGTGCCCTGCATCGCCGCCTGCTCCCCGGACGCCGCCCGCGAGGTGCTCAAGACCCACGAGGCCGCGTTCCTGGACCGCCCCAAG…		MDKARTSRSRQASQLRSIVSMEMALAARDLFTPAGTSVPLLLLVAGLTAVLYAVTRHRSGGLRLPPSPFGLPILGHLHLLVPLPHQALHRLAERHGPLLYLRLGSVPCIAACSPDAAREVLKTHEAAFLDRPKPTAVHRLTYGGQDFSFSAYGPFWRFMKKACVHELLAGRTLDRLSHVRREEVARLVDSLGQSAAEGKLVDVDAALMGLTGDIVSRMVMSRRWTGDDNDTEEMRSVVAETAELTGTFNLQDYIGAFKNWDVQGLGKRIDAVHRKFDAMMERILTARDVKRRQQREDGGEGEGKDILDILFDMHEDDDAEMTLTRDNIKAFMLDIFAAGTDTTTITVEWAISELINNPDVLRKAQEEMDAVVGKDRLADESDIPNLPYLQAVAKETLRL…
Oryza sativa v7.0	LOC_Os06g41070.1	OsaCYP93F1	ATGGATCATCAGCTGGTAGCTCGAGGTCTCTTCAAGCCTCTCCTCCTCTTCGTCGCCGGCCTGATTGTTCTCTACGCGCTCCGCCGCCGCCGCCGCCACCGCCGGAGCAGCGGCCTGCGCCTCCCGCCGAGCCCGTTCGGGCTGCCCATCCTGGGCCACCTCCACCTGCTCGCGCCGCTGCCGCACCAGGCGCTCCACCGCCTCGCCGCGCGCCACGGCCCGCTCCTCTTCCTCCGCCTCGGCTCCGTCCCCTGCGTCGCCGCCTGCTCGCCGGACGCCGCCCGCGAGGTGCTCAAGACCCACGAGGCCGCGTTCCTCGACCGCCCCAAGCCCGCCGCCGTCCACCGCCTCACCTACGGCGGCCAGGACTTCTCCTTCTCGGCGTACGGGCCCTACTGG…		MDHQLVARGLFKPLLLFVAGLIVLYALRRRRRHRRSSGLRLPPSPFGLPILGHLHLLAPLPHQALHRLAARHGPLLFLRLGSVPCVAACSPDAAREVLKTHEAAFLDRPKPAAVHRLTYGGQDFSFSAYGPYWRFMKRACVHELLAGRTLDRLRHVRREEVARLVGSLRASADGGERVDVDAALMGLTGDIVSRMVMGRRWTGDDNDAEEMRSVVAETAELTGTFNLQDYIGVFKYWDVQGLGKRIDAVHRKFDAMMERILTAREAKRKLRRQAAADGEDDEKDLLDMLFDMHEDEAAEMRLTRDNIKAFMLDIFAAGTDTTTITLEWALSELINNPPVLRKLQAELDAVVGGARLADESDIPSLPYLQAVAKETLRLHPTGPLVVRRSLERATVAGYD…
Brachypodium distachyon v2.1	Bradi1g35980.1	BdiCYP93F1	ATGGAGGTGGCCGCAGCGGCACGAGACCTCTTCAGTACTCCCACGAGCACACCGCTCCTCGTGCTCATCGCAGGCGCCACCGCCGTCCTCTACGCCGTGCTCCGGCGCCGGGGCAGCGGCCTCCGCCTCCCGCCGAGCCCATTCGCGCTCCCCATCCTGGGCCACCTCCACCTCCTGGCGCCGCTGCCGCACCAGGCGCTGCACCGGCTGGCCCAGCGCCACGGCCCGCTCCTCTTCCTCCGGCTGGGCTCCGTGCCCTGCATCGCCGCCTGCTCCCCCGACGCGGCCCGCGAGATCCTCAAGACCCACGAGGCCGCGTTCCTGGACCGGCCCAAGCCGGCGGCCGTGCACCGCCTCACCTACGGCGGGCAGGACTTCTCCTTCTCCCCCTACGGCGCC…		MEVAAAARDLFSTPTSTPLLVLIAGATAVLYAVLRRRGSGLRLPPSPFALPILGHLHLLAPLPHQALHRLAQRHGPLLFLRLGSVPCIAACSPDAAREILKTHEAAFLDRPKPAAVHRLTYGGQDFSFSPYGAYWRFMKKACVHELLAGRTLDRLAHVRREEVGRLVQSLAASAADGAAVDVDAALMGLTGDIVSRMVMGRRWTGDDNDTEEMRSVVAETAELTGTFNLQDYIGAFKYWDAQGLGKRIDAVHRKFDAMMERILTARDAKRRQQKLDQDGCETEGKDILDILFDMHEDEAAEMPLSRDNIKAFMLDIFAAGTDTTTITVEWAMSELINNPAVLRRAQEEIDAVVGKSRLVDESDVASLPYLQAVAKETLRLHPTGPLVVRRSLEQCKVGG…
Triticum urartu v1.0	tu__TRIUR3_24966	TurCYP93F1	ATGGCGCTGGCAGCACGAGACCTGTTCACTCCCGCCGGCACCAGCGTACCGCTCCTCCTGCTCGTCACCGGCCTCACCGCCGTCCTGTACGTCGTGACCCGGCGCAGGACCGGCGGGCTACGCCTCCCGCCTAGCCCATTCGGCCTGCCCATCCTCGGCCACCTCCCCCTCCTCATGCCGCTGCCGCACCAGGCGCTGCACCGCCTGGCCGAGCGCCACGGCCCGCTCCTCTACCTCCGTCTCGGCTCCGTGCCCTGCATCGCTGCCTGCTCCCCGGACGCCGCCCGCGAGGTGCTCAAGACCCACGAGGCCGCGTTCCTGGACCGCCCCAAGCCGACGGCGGTGCACCGCCTCACCTACGGCGGCCAGGACTTCTCCTTCTCCGCGTACGGGCCCTTC…		MALAARDLFTPAGTSVPLLLLVTGLTAVLYVVTRRRTGGLRLPPSPFGLPILGHLPLLMPLPHQALHRLAERHGPLLYLRLGSVPCIAACSPDAAREVLKTHEAAFLDRPKPTAVHRLTYGGQDFSFSAYGPFWRFMKKACVHELLAGRTLDRLSHVRREEVVRLVVSMGQSAAKGKPVDVDAALMGLTGDIVSRMVMSRRWTGDDNDTEEMRSVVAETAVVTGTFNLQDYIGVFKNWDVQGLGKRIDAVHRKFDAMMEKILTARDAKRRQQRESANSEDGGEGEAKDILDILFDMHEDDAAEMPLSRDNIKAFMLVLLDQLLDLFIHDAVEST*
Triticum urartu v1.0	tu__TRIUR3_27247	TurCYP93F12	ATGGCGCAGGCAGCACGAGACCTGTTCATTCCCACCGGCACCAGCGTACCGCTCCTTCTGCTCGTCGCCGGCCTCACCGCCGTCCTGTACGCCGACTTCTCCTTCTCCGCGTACGGGCCCTTCTGGCGCTTCATGAAGAAGGCCTGCGTGCACGAGCTCCTCGCGGGCCGCACCCTCGACCGCCTCAGCCACGTCCGCCGCGAGGAGGTCGTGCGCCTCGTGGTCTCCATGGGGCAGAGCGCGGCCAAGGGCAAGCCCGTGGACGTGGACGCCGCGCTAATGGGCCTGACCGGCGATATCGTCTCGCGGATGGTGATGAGCCGGCGGTGGACCGGCGACGACAACGACACCGAGGAGATGCGGAGCGTGGTCGCGGAGACGGCCGTGGTCACGGGCACG…		MAQAARDLFIPTGTSVPLLLLVAGLTAVLYADFSFSAYGPFWRFMKKACVHELLAGRTLDRLSHVRREEVVRLVVSMGQSAAKGKPVDVDAALMGLTGDIVSRMVMSRRWTGDDNDTEEMRSVVAETAVVTGTFNLQDYIGVFKNWDVQGLGKRIDAVHRKFDAMMEKILTARDAKRRQQRESANSEDGGEGEAKDILDILFDMHEDDAAEMPLSRDNIKAFMLDIFAAGTDTTAITVEWALSELINNPDVLRKAQEEMDAV
Triticum urartu v1.0	tu__TRIUR3_33760	TurCYP93F11	TCCTTCTCCGCGTACGGGCCCTTCTGGCGCTTCATGAAGAAGGCCTGCGTACGCGAGCTCCTCGCGGGCCGCACCCTCGACCGCCTCAGCCACGTCCGCCGCGAGGAGGTGTCGCGCCTCGTGGTCTCCCTGGGGCAGAGCGCCGCCGAGGGCAAGACCGTGGACGTGGACGCCGCGCTCATGGGCCTGACCGGCGACATCGTCTCGCGGATGGTGATGAGCCGGCGGTGGACCGGCGACGACAACGACACCGAGGAGATGCGGAGCGTGGTCGCCGAGACGGCCGAGCTCACGGGCACGTTCAACCTGCAGGACTACATCGGCGCGTTCAAGAACTGGGACGTGCAGGGCCTCGGCAAGCGCATCGACGCCGTGCACCGCAAGTTCGACGTCATGATG…		SFSAYGPFWRFMKKACVRELLAGRTLDRLSHVRREEVSRLVVSLGQSAAEGKTVDVDAALMGLTGDIVSRMVMSRRWTGDDNDTEEMRSVVAETAELTGTFNLQDYIGAFKNWDVQGLGKRIDAVHRKFDVMMERILTARDAKRRQQRETADSDDGGEGERKDILDILFDMHEDDAAEMQLTRDNIKAFMLDIFAAGTDTTTITVEWALSELINNPDVLRKAQDEMDAVVGKDRLADESD
Aquilegia coerulea v1.1	Aquca_007_00720.1	AcoCYP93H2	ATGATTCTTAAAATATTATTTTATATCAGCATTTTCGTCCTAACTACCCTTTTAGGTCGAAAGTTTTGGTCCCCAAAAACCCAAAAGTGCGTTACCAGACTCCCACCAAGTCCCAAAGAACTACCAATCATTGGACACCTTCACCTCCTCAACAACACCCCTCACCAAACCTTTCATAATCTCTGTGCGCGCTATGGTCCCTTGATCCATCTTCGCCTTGGTTCAGTCATTTGCATAATCGCGTCTACTCCCGAGCTTGCAAAAGAACTCCTCATTACCAACGGCCACACCTTTGCTTCACGTCCAGTAAATATTGCAATCAATCTTCTTACTTATAACTCCGTTGATTTTGTCTTTGCTCCTTATGGCTCTTACTGGAAATTCATGAAAAAGATTGTC…		MILKILFYISIFVLTTLLGRKFWSPKTQKCVTRLPPSPKELPIIGHLHLLNNTPHQTFHNLCARYGPLIHLRLGSVICIIASTPELAKELLITNGHTFASRPVNIAINLLTYNSVDFVFAPYGSYWKFMKKIVASELLGDQTLAQLKDIRFDEASQLIHFLLNKARTGTIVNLSQEVTKVSNNIITRMMWNIRCSGEDEQAKEIRNLVRDSMEILAQFNLSDFIGILRNIDLQGIRKRAKNIHLRSDALLEAIMKKREEVRNEKKEKTNMSFVGGDHKINDFLNILLDTLEDEESKIRLTRENIKAFMFDILTAGTDTSGIVVEWAMSELINHPTILQKAIEEIDSVVGKNRLVKESDIQDLPYLQAIFKETLRLHPPIPIFDRESTEDCNIAGYDIPA…
Aquilegia coerulea v1.1	Aquca_007_00722.1	AcoCYP93H1	ATGGAGATGGCATTTGAAATTTTGTTTTACATTATTCTTATCTTTTCCCTATCATCCATTTTCGGTCGAAAGTTTCTGTCTGCTAAGTCGCAAAAATGTATTAGTAATCGTCTTCCTCCAGGTCCTAAGGGACTACCAATAATTGGACACCTTCATCTCCTCAACAACACCCCTCATCAAACCTTCCACAACTTGTGTAGCCGTTATGGTCCTTTTATTCATGTCCGTCTTGGTTCTGTCTTTTGCATTGTCGCTTCTAGTGCTGAATATGCAAAAGAAACCCTTGTCACTAATGGTCTAGCCTTTGCTTCACGTTCTGTAAATATTGCAAGTGATCTTCTTACTTATGGTTCTGCAGGTTTTGGTTTTGCTCCTTATGGACCTCAATGGAAGTTCATG…		MEMAFEILFYIILIFSLSSIFGRKFLSAKSQKCISNRLPPGPKGLPIIGHLHLLNNTPHQTFHNLCSRYGPFIHVRLGSVFCIVASSAEYAKETLVTNGLAFASRSVNIASDLLTYGSAGFGFAPYGPQWKFMKKLVTTELLSDKNMTQLKYVRSDEASQLVQLLLDNATSGTVVNVSNEVTMLSNNIISRMMWNIRCSGEDEDGKEIISIIRECTEILAQFNLSDFIPFLGKIDLQGVRKRAMNIHLRYDAILEIIIKKRHEERRKNKERNMQDAGGDNGDDHNSKNFLNILLDAMEDENAKTPVTIENIKALMFDFLNAGTDTSATVVEWSLSELINHPTIMAKARQEIDTIVGKDRLVQESDLPNLPYLQAIFKESLRLHPPVTLFGRESIQDCKI…
Aquilegia coerulea v1.1	Aquca_086_00030.1	AcoCYP93H3	CCAACGGTTTGGTCATCAAAAACACAAAAGCGCCTTACCGGACTCCCACCAAGTCCCAAGGAAATACCATTCATTGGACACCTTCACCTCCTCAACAACACCCCTCATCAGACTTTTCACAATCTTTGCAGCCATTATGGTCCCTTGATTCATCTTCGCCTTGGTTCAGTTCTTTGCATAATTGCTTCTACTCCTGAGCTTGCAAAAGAACTCCTCATTACCAATGGCATCACCTTTGCTTCACGTCCGGTAAATATTGCAATTAGTCTTCTTACTTATAACTCTGCTGGTTTTGGCTTTGCTCCTTATGGTCCTTACTGGAAGTTCATGAAAAAAATTGTCACTTCTAATTTACTTGGTGATCAAACACTTACAAAACTAAAAGACATTCGGTTTGAG…		PTVWSSKTQKRLTGLPPSPKEIPFIGHLHLLNNTPHQTFHNLCSHYGPLIHLRLGSVLCIIASTPELAKELLITNGITFASRPVNIAISLLTYNSAGFGFAPYGPYWKFMKKIVTSNLLGDQTLTKLKDIRFEETSQLIHFLLDKARNETTVNLSQEVTKVSNNIISRMMWNIKCSGEDDQAKEIRTLIRDSTEILAQFNLSDFIGFLWYIDLQGIRKRAKNIHLRYDVLLENIMKKREEVRNENKEKINDFLNILLDTMEDDESKIRLTRENIKAFMFDFLTAGTDTSGIVVEWAMSELINHPTILEKAIEEIDSVVGKNRLVKESDIQNLPYLLAIFKETLRLHPPIPIFERESTENCNIAGYDIPAKTILFINNWSICRDPKNWKNPLQFQPERFM…
Mimulus guttatus v2.0	Migut.D02138.1	MguCYP93B36	ATGGACCTAGTCCAGCTCACACTCTCCACCGCCCTCTTCCTCCTCTCCGCCGCCTTCCTCCACACAATCCTCACCGCCGCAAAGCGCCGCCGCCGCCTCTCCTACCCACCGGGCCCACTCGCCCTCCCCATCATCGGCCACCTCCACCTCCTCGGCCCGCGCCTCCACCAAACCTTCCACGACCTCTCCCTCCGCCACGGGCCCTTAGTCCAGCTCCGCCTCGGCTCCGTCGCGTGCGTGGTGGCGTCCACGCCGGAGCTCGCCAAGGAGTGCCTGAAGACCCACGAGCTCGTCTTCTCCTCCCGGAAACACTCCACCGCCATCGACATCGTCACCTACGACTCGTCGTTCGCCTTCTCGCCGTACGGGCCGTACTGGAAGTACATCAAGAAGCTCTGC…	One intron	MDLVQLTLSTALFLLSAAFLHTILTAAKRRRRLSYPPGPLALPIIGHLHLLGPRLHQTFHDLSLRHGPLVQLRLGSVACVVASTPELAKECLKTHELVFSSRKHSTAIDIVTYDSSFAFSPYGPYWKYIKKLCTYELLGARNLLHFRPIRTLEVNSFVGDLMAKAESGEAFNVTEELVKLTSNVISHMMLGIRCSGTDGDAEAARTVIREVTQIFGEFDVADIIWFCKNFDFQGIRKRSEDIQRRYDALLEKIITDREELRRNHGGAAGEARDFLDMFLDIMEGGKSEVTFTREHLKALILDFFTAGTDTTAITAEWAISELINNPKVLHKAQQEIDRVIGSDRLVQESDAADLPYLMAIIKETFRLHPPIPMLARKSISDCVIDGYDVPSNSLLFVNL…
Mimulus guttatus v2.0	Migut.D02145.1	MguCYP93B37	ATGGACCAAGTGGAAATATCACTCCACGGCTACGCCACCCTCATCGTCCTCTCCGCCACCCTCCTCCTCCTCGTTATACGCGGCCGCCGCCGCCGCCCCTCCTCTCCTCCAGGCCCACTCGCCCTCCCCATCATCGGACACCTCCACCTCCTCGGGCCACGCCTCCACCAAACCTTCCACGATCTGTCCCTCCGGCACGGCCCGATCCTCCACCTCCGCCTGGGCTCCGTCCCCTGCGCCGTCGTCTCCTCCGCCGACCTCGCCAGAGAATCCCTCAAAACCCACGACCTCGTCTTCTCCTCCCGCCAAAACTCCACCGCCATCGACATCATCACCTACGGCTACGGCTCCTCCTTCGCCTTCAGCCCCAACGGCCCCTACTGGCGGTACATCAAGAAA…	One intron	MDQVEISLHGYATLIVLSATLLLLVIRGRRRRPSSPPGPLALPIIGHLHLLGPRLHQTFHDLSLRHGPILHLRLGSVPCAVVSSADLARESLKTHDLVFSSRQNSTAIDIITYGYGSSFAFSPNGPYWRYIKKLCTTELLGPRNLRHFQLVRTSEVKNFLEILMQKGKSGETVNLTEELLKLTSNVISVMMLGIRSSETEGEAAEGARTVFREVTQIFGEFNVSDIVWFCRRFDLQGIKKRALDIHRRYDAFLEKIISDREELRRSRGGGVEEANDFLDLFLDIMESGKPEVEFTRKHLKALILDFFTAGTDTTSIATEWAIAELINNPRILKKAQQEIDEVVGSDRLVEESDAPNLPYLMAIIKETFRLHPPIPMITRISSSDCTINGYKVSAKTLLF…
Capsicum annuum v1.55	CA06g24290	CanCYP93B38	ATGGTGCTACCAATTAGTACAACTACAGTATTTTCCTACGTGATCCCCTTTCTCCTCTCAATTCTCATTTTACGTCCCATTTTTTCAAAATTATTACCAAAACATCACCATAACCTCCTCCGTCGTCCGCCGTCCCCGATGGCTTTGCCTGTTATCGGACATCTCCATCTCCTAAGCTCGAATCTTCATCGTAGTTTTCACGAATTATATTGCCGTTACGGTCCTTTATACCAGCTACATATTGGACATCAATTATGTTTCGTAGCTTCCACACCTCAACTAGCAAAAATATTCTACAAAAACAATGAATTCATTTTTTCATCTCGCAACTGTTCACCCGCTGTGATATTACTAACGTACGATGCTTCTTTCGCCTTTTCGCCCGTTGGACCCTACTGG…		MVLPISTTTVFSYVIPFLLSILILRPIFSKLLPKHHHNLLRRPPSPMALPVIGHLHLLSSNLHRSFHELYCRYGPLYQLHIGHQLCFVASTPQLAKIFYKNNEFIFSSRNCSPAVILLTYDASFAFSPVGPYWKFIKKIATYELLSAHNLNNFLPLRAREITRFLRTLMNKAEAKETTVNLTKEFSKLTSNIISGMMMSSRCSENDKEAEEIIQVVKEVTEIFGMFDVADVIGFGGWFDFQGIKKRARITHKKYDALLEKFIATRKKLRSKRKLEETKDHEEAGKDLLDLLLDIMESETVSEVKISQDHIKALILDFITAATDTTALTLEWAIAELTNNPSILKKAQQEIDNVVGKHRIVGELDGPNLPYIQAIINETFRLHPPVPLLARKSVEDCNVE…
Capsicum annuum v1.55	CA06g24300	CanCYP93B39	ATGGAACCATCAATTAGTACAATTTTTTCTTATGCTGTCCTCTCAGTCCTTTCTGTTCTCATTTTGCATGCCATTGTGTCCAAATTATTCTGTCGTGGTCCGCCGTCCCCTCTAGCTTTACCCATAATCGGACATCTCCATCTCCTTAGTCCCTCTATTCATCATACTCTTCACAAATTCTATCACCGTTACGGTCCGTTATTTCAACTGTATATCGGACATCAATCATGTTTCGTGGCTTCCACACCTCAACTAGCAAAAGAATTCCTTAAAAACAACGAAGTAGTCTTTTCATATCGACACACTTCACCCGCCATTACGAAACTAACGTACAATGTTTCTTTCGCCTTTTCGCCCTTAGGGCCGTACTGGAAATTCATTAAGAAATTAGCTTCAAGC…		MEPSISTIFSYAVLSVLSVLILHAIVSKLFCRGPPSPLALPIIGHLHLLSPSIHHTLHKFYHRYGPLFQLYIGHQSCFVASTPQLAKEFLKNNEVVFSYRHTSPAITKLTYNVSFAFSPLGPYWKFIKKLASSELLSAHNLNYFRPLRAPEITRFVQNLMNKAEANETVNLTKELLKLTSNIISQMMMSSRCAENDKEAAEVIEVVTEVTEIFGIFDVADVIGFGGWFDFQGIKKRARNTHKKYDALLDKFITERKRLRNERKLDESKGEAAGKDLLDLLLDVMESETTKSEVKLTGNHIKALILDFLTAATDTTAITLEWAIAELTNNPRVLRKAQQEIDNVIGKQRLVGELDAPNLPYIQAIINETLRLHPPIPLIIRESREDCKVQGYQIPSGSLL…
Prunus persica v1.0	ppa017619m	PpeCYP93B40	ATGGCACTTGAGCTAGTCCTACTCATGATCCTCTTTCTTCTCTTAGTTATCCCTCTTCTTTTCTTCCCAACCCTAACCTCCAAAATATTCCAAACCCACCTTCACCTCCCTCCAAGCCCCTTAGCTCTACCCATCATAAGCCACTACCACCTCCTCGGCCCTCTCATCCACCGCACCTTCCACAACCTCTCTCTCCGCTTCGGCCCCTTATTCTCCCTCCGCCTTGGCTCGCTCCAATGCGTTGTCGTTTCCTCAGCGGCCCTAGCGAAAGAGTTCCTCAGCACCCATGAGCTCTCCTTCATATCCCATGCTCAGTCCCTCGCCATTGAAAGCATAACCTACAATGCTTCCCTTGCATTTGCACCCTATGGACCTTACTGGAAGTTCATCAAGAAACTG…		MALELVLLMILFLLLVIPLLFFPTLTSKIFQTHLHLPPSPLALPIISHYHLLGPLIHRTFHNLSLRFGPLFSLRLGSLQCVVVSSAALAKEFLSTHELSFISHAQSLAIESITYNASLAFAPYGPYWKFIKKLTVNELLGNRSINNLVSIRTQEYLRLLRFLAKKAESGEAVNLTEEFPKLWNNVTLEMIVGNRGLSAKGRAVLAKEAAVVVRQATRLFGEVSLCDFFWVCKKLDLGGFVKRIEETHRRFDVLVEKVIREREELRKKERMEEEEEVKDFLDTLLDMLEDGSAEVEFTRLHIKALITDLFTAGTDTNAISLEWALAELINHPRVLKKAREEIDRAVGNRRVAGESDVPNLPYIQAIIKETLRLHPPVPLVTRNSVQPCKIGGYDIPTNTM…
Prunus persica v1.0	ppa020034m	PpeCYP93B41	ATGGCACTTGAGCTAGTCCTACTCATGATCCTCTTTCTTCTCTTAGCTATCCTTCTTATTCTCTTCCCAATCCTAACCTCCAAAATATTCCAAACCCACCTTCACCTCCCTCCAAGCCCCTTAGCTCTACCCATCATAGATCACTACCATCTCCTCGGCCCTCTCATCCACCGCACCTTCCACAACCTCTCTCTCCGCTTCGGCCCCTTATTCTCCCTCTGCCTCGGCTCGCTCCAATGCTTTGTCGTTTCCTCAGCGGACCTAGCGAAAGAGTTCCTCAGCACCCATGAGCTCTCCTTCATATCCCATGCTCAGTCCCTCGCCATTGAAAGCATAACCTACAATGCTTCCCTTGCATTTGCACCCTATGGACCTTACTGGAAGTTCATCAAGAAACTG…		MALELVLLMILFLLLAILLILFPILTSKIFQTHLHLPPSPLALPIIDHYHLLGPLIHRTFHNLSLRFGPLFSLCLGSLQCFVVSSADLAKEFLSTHELSFISHAQSLAIESITYNASLAFAPYGPYWKFIKKLTLKELLGNHSINNLVSIRTQEYLRLLRFLGKKAESGEAVNLTEEFPKLWNNVILQMIVGNRGLSAEGRVVLAEEAGVLVRQATRLFGEVSLCDFFWACKKLDLGGFVKRIEETRRRFDVLVEKVIREREELRKKERMEEKEEVKDFLATLLDMLEDGSAEVEFTRLHIKALITDLFMAETDTNAISLEWALAELINHPRVLKKAKEEIHRAVGNRRVAGDSDVPNLPYIQAIIKETFRLHPPVPLVTRNSVQQCKIGGYDIPTNTM…
Prunus persica v1.0	ppa025750m	PpeCYP93B42	ATGGCACTTGAGCTAGTCCCACTCATGATCCTCTTTCTTCTCTTAGCTATCCCTCTTCTTCTCTTCCCAACCCTAAGCTCCAAAATATTCCAAACCCACCTTCACCTCCCTCCAAGCCCCTTAGCCCTACCCATCATAGGCCACTACCACCTCCTTGGCCCTCTCATCCACCGCACCTTCCACAACCTCTCTCTCAGCTTCGGCCCCTTATTCTCCCTCCGCCTCGGCTCGCTCCAATGTGTTGTCGTTTCCACACCGAACCTAGCCAAAGAATTCCTCAGCACCCATGAGCTCTCGTTCATATCCCATGCTCAGTCCCTCGCCATTGAAAGCATAACCTACAATGCTTCCCTTGCATTTGCACCCTATGGATCTTACTGGAAGTTCATCAAGAAACTG…		MALELVPLMILFLLLAIPLLLFPTLSSKIFQTHLHLPPSPLALPIIGHYHLLGPLIHRTFHNLSLSFGPLFSLRLGSLQCVVVSTPNLAKEFLSTHELSFISHAQSLAIESITYNASLAFAPYGSYWKFIKKLTVNELLGNRSINNLVSIRTQEYLRLLRFLAKKAESGEAVNLTEEFPKLWNNVTVQMIVGNRGLSAEGRAARAEEAGVVVRQATRLFGEVSLCDFFWVCKKLDLRGFVKRIEETHRRFDVLVEKVIREREELRKKERMEEHGGEKEEEVKDFLDTLLDLLEDGSAEVEFTRIHLKALITDLFTAGTDTNAISLEWALAELINHPRVLKKAREEIDRAVGNQRVAGESDVPNLPYIQAIIKETFRLHPPVPLVPRNSVQQCKIGGYDI…
Pyrus bretschneideri v1.0	pb__Pbr033979.1	PbrCYP93B43	ATGCCTCACCTACAATACTTCACTTGCCTTTGCACCTTATGGGCCCTACTGGAAATTTATGAAGTCATTAATGAGTTTCTAAGCAGCCGTAGCGTCAACAACTTTGCTTCGATTCGAACACAAGAGTACCTAAGGCTTTTGAGGCTGTTGGCCAAGAAAGCTGAGAGTGGTGAAGCTGTAAATCTCACCGAGGAGCTACCAAAGCTTTCCAACAATGTGATTGCAAAGATAATTTTGGGAAGTTCCAAAGGACCGAGTGATGAGGGCGGGGATGAGGAAGCTAGGGTTGTGGTGAGAGAGGTGACAAGGATTTTTGGGGAGTTTAATTTGTCAGATTTTGTTTGGTTTTGCAAGAAGACTGATTTGCAGGGATTTGGGAAGAGAATTGAAGACACTCAT…		MPHLQYFTCLCTLWALLEIYEVINEFLSSRSVNNFASIRTQEYLRLLRLLAKKAESGEAVNLTEELPKLSNNVIAKIILGSSKGPSDEGGDEEARVVVREVTRIFGEFNLSDFVWFCKKTDLQGFGKRIEDTHRRYDALVEKVISEREDLRKKNMRNGGGSGDHKEEEVEKVKSFLDILVDLVGKEGGEIEDVKFTKVHIKALIMDFFTASTDTTAISVEWGLAELINHPKVLNKAREEIERVVGNGRLLVESNGPNLPYIQAIIKETLRLHPPVSLITRKCVQQCKIGKYVIPENTVLFVNAWAIGRDP*
Malus domestica v1.0	MDP0000214215	MdoCYP93B44	ATGGCAGTCGTTGAGCTCCTCTCCCTCTTCTCGGTTCTCTTCATCGTGTTTCTTCTTCTCCGAYCCCTCTCTGCCTCCAAATCCCAAACCCTACTCCCTCCAGGCCCCTTTGCCCTACCCATCATCGGCCACTTCCACCTCCTCAGCCCTCTCATCCACCAATCCTTCTACAAACTCTCCCTCCAGTTCGGCCCTTTATTCTCTCTCCGCCTTGGCTCCGTCCCATGCATCGTCATTTCTTCCCCAGACCTCGCGAAAGAGTCCCTCAAGACCCACGAGCTCTCCTTCATATCCCGCTCTCAGTCCATGGCCATTCAGCGCCTCACCTACAACTCCTCCCTTGCATTTGGACCCTATGACCCTTATTATAAATTCATCAAGAAGCTCAGCCTGAATGAG…		MAVVELLSLFSVLFIVFLLLR?LSASKSQTLLPPGPFALPIIGHFHLLSPLIHQSFYKLSLQFGPLFSLRLGSVPCIVISSPDLAKESLKTHELSFISRSQSMAIQRLTYNSSLAFGPYDPYYKFIKKLSLNEFLSSRSVSNFASIRTQEYLRLFRLLAKKAESGEAVNLTEELPKLSNNVIAKMMLGNSKGSSAEGRDEEARLVVREVTRIFGEFNLSDFVWFCKKLDLQGFGKRIEDTHRRFDALVEKVISEREKLRKKNMKNEGGSGGEEVKDFLDILLDILEKGSAESEGVEFTRVHIKALVMNNCTETRPRLFAHKVSFLRLLSDDCTDTTAISMEWALAELINHPKVLEKVREEIDRVVGNRRIVVESDGPNLPYIQAIIKETLRLHPPVPMI…
Malus domestica v1.0	MDP0000257103	MdoCYP93B45	ATGGCACATGAGCAAGTCCTATTTATGATCCTCTTCCTTCTCTTAACTATCCCTCTTATTCTCTTCCCCACCCTAACCTCAAAACTATTTCAATCACACCACCCTCGACTCCCTCCAAGCCCCTTAGCCCTACCCATCATCGGCCACTACCACCTCCTCGGCCCTCTCCTCCACCGCACCTTCCACAACCTCTCTCACCACTTCGGCCCCTTATTCTCCCTCCGGCTCGGCTCTCTCCAGTGCGTTGTAGTTTCCTCCCCGGACCTCATAAAAGAGTTCCTCAGCACCCACGAGCTCTCCTTTATATCCCACGGACAGTCCCTCGCTATTGAAAGCATGACCTACAACGCTTCCCTTGCATTTGCACCCTACGGGCCCTACTGGAAGTTCATAAAAAAA…		MAHEQVLFMILFLLLTIPLILFPTLTSKLFQSHHPRLPPSPLALPIIGHYHLLGPLLHRTFHNLSHHFGPLFSLRLGSLQCVVVSSPDLIKEFLSTHELSFISHGQSLAIESMTYNASLAFAPYGPYWKFIKKLTVNELLSNRSIHNSMPLRTQEYLKLLRLLAKKAESCEPVNLTEEFPKLWNNVTVDMILGTKGSSAEGRVARAEEARLVVRQATRLFGEMSLCDFFWVCKKLDLGGFVKRIGDTHKRFDVLVEKIIREREEMRNKEKKEEVKDFLDILVDMLEDESLEVEFTRVHLKALITDLFTAGTDTNAISLEWALAELINHPRVLEKAREEIDRVIGNKRLVGEPDVPNLPYLQAIIKETFRLHPPVSLVTRKSGQQCKVGGYDIPTNTMLF…
Malus domestica v1.0	MDP0000260659	MdoCYP93B46	ATGGCAGTCGTTGAGCTCCTCTCCCTCTTCTCGGTTCTCTTCATCGTGTTTCTTCTTCTCCGAYCCCTCTCTGCCTCCAAATCCCAAACCCTACTCCCTCCAGGCCCCTTTGCCCTACCCATCATCGGCCACTTCCACCTCCTCAGCCCTCTCATCCACCAATCCTTCTACAAACTCTCCCTCCAGTTCGGCCCTTTATTCTCTCTCCGCCTTGGCTCCGTCCCATGCATCGTCATTTCTTCCCCAGACCTCGCGAAAGAGTCCCTCAAGACCCACGAGCTCTCCTTCATATCCCGCTCTCAGTCCATGGCCATTCAGCGCCTCACCTACAACTCCTCCCTTGCATTTGGACCCTATGACCCTTATTATAAATTCATCAAGAAGCTCAGCCTGAATGAG…		MAVVELLSLFSVLFIVFLLLR?LSASKSQTLLPPGPFALPIIGHFHLLSPLIHQSFYKLSLQFGPLFSLRLGSVPCIVISSPDLAKESLKTHELSFISRSQSMAIQRLTYNSSLAFGPYDPYYKFIKKLSLNEFLSSRSVSNFASIRTQEYLRLFRLLAKKAESGEAVNLTEELPKLSNNVIAKMMLGNS?GSSAEGRDEEARLVVREVTRIFGEFNLSDFVWFCKKLDLQGFGKRIEDTHRRFDALVEKVISERE?LRKKNMKNEGGSGGEEVKDFLDILLDILEKGSAESEGVEFTRVHIKALVMVRTDTTAISMEWALAELINHPKVLEKVREEIDRVVGNRRIVVESDGLNI?AIIKETLRLHPPVPMIPRKSVQKCNIGNYVIPENTMLFVNAW…
Malus domestica v1.0	MDP0000262153	MdoCYP93B15	ATGGCAGTCCTCGAGCTCCTCTTCCTCTTCTCTTTTCTCTTGACCATCCCTCTTCTTCTCCGTCCAGTCTTTGTCTCCAAATCCGAAACCCTACTCCCTCCAAGCCCCTTAGCCCTACCCATCATCGGCCACTTCTACCTCCTCGGTCCTCTCCTCCACCGATCTTTCTACAAACTCTCCCTGCAGTTTGGCCCCTTATTCTCTCTCCGTYTTGGCTCCGTCCCATGCATTGTGGTTACCTCGCCAGAGATTGCAAAAGAGTTCCTCAAAACCCACGAGCTGTCCTTCATATCCCGTGCTCAAACCATCGCCATCGAACGCCTGACCTACAATTACTCTACCCCAGGATTTGCACCCTACGGGCCTTATTATAAATTGATCAAGAAGCTCAGCGTTAAT…		MAVLELLFLFSFLLTIPLLLRPVFVSKSETLLPPSPLALPIIGHFYLLGPLLHRSFYKLSLQFGPLFSLR?GSVPCIVVTSPEIAKEFLKTHELSFISRAQTIAIERLTYNYSTPGFAPYGPYYKLIKKLSVNEFLSNRNVSNFASIRTQEYLSLLRLLAKKAESGEAINLTEELPRNFNNVIAKMMLGNSKGSS?EGRDEEARLVAREVTRIFGEFNLSDFVWFCKKLDLQGFGKRIENTHRRYDALMEKVISEREELRKKNMKNGGGNVEEEMVLKDFLDVLLDLLEKGSGEIEGVKFTRVHIKALIMIVLFQGFFTAGTDATAIL?EWALAELINHPKVLKKVREEIDQAVGNKRLLVESDGPNLPYIQAVIKEACRLHPPVSVVTRKCVEKCKFG…
Malus domestica v1.0	MDP0000305261	MdoCYP93B47	ATGGCAGTCCTTGAGCTCCTCTCCCTCTTCTCTATTCTCTTCATCATCTCTCTTCTTCTGCGACCCTCTTTGCCTCCAAATCCCAAACCCTACTCCCTCCAAGCCCCCCCTCTCATCCACCAAACTTTCTACAAACTCTCCCTCCGGTTTGGTCCTTTATTCTCTCTTCGCCTTGGCTCCGTCCCATGCGTCGTCATTTCGTCACCAGACCTCGCGAAAGATTTCCTCAAGACCMACGAGCACTCTTTCACATCCCGTTCTCAGTCCATTGCGATTGAGCCCCTCAGCTACAACTCCTCCTTTTCATTTGGACCCTATGGACCTTATCATAAATTCATCAAGAAGCTCAGCACGAATGAGTTTCTAAGCAGCCGTAGCGTCAGCAACTTTGCTTCAATT…		MAVLELLSLFSILFIISLLLRPSLPPNPKPYSLQAPPLIHQTFYKLSLRFGPLFSLRLGSVPCVVISSPDLAKDFLKT?EHSFTSRSQSIAIEPLSYNSSFSFGPYGPYHKFIKKLSTNEFLSSRSVSNFASIRTQEYLRFLRLLAKKAESGEAVNLTEELPKLSNNVIAKMMLGNSKGSSAEGRDEEARLVVREKLDFQGFGKRIEDIRRRFDALVEKVISEREQLRKKNMKNGGGSGGEEVKDFLDILLDILEKGSAESEEVESKRVHIKVLIIVFKVILHEVNFVNIKIFHIKVGEEIREWDEFFTAGTDTTAISMEWALADLINHPKELEKAREEIDRVAGKRRLVVESDGPNLPYIQAIIKETLRLHPSVPMIPRKSVQKCNIGNYV?PENTML…
Fragaria vesca v1.1	mrna12016.1	FveCYP93B48	ATGGCAATCGAGTTAGTCCTATTCATCCTCTTCCTTGTTTTGGTTTTCTTAATCTCCAGACACTTTCGTGTGAACCACCTTCTTCCTCCGAGCCCGTTAGCCTTGCCCATCATCGGCCATTTCCACCTCCTCAGCCCCCTCATCCACCGCTCCTTCCACGACCTCTCCCTACGCTTAGGTCCTGTATACTCTCTTCGCCTTGGCTCTGTCCCATGCGTCGTGGTTTCGTCACCGGAGGTGGCAAAAGAGTTCCTCAAAACACACGAGCTCTCCTTCATGAACAGGACTGCAAATATCGCAGCTGCAAGCATGACCTACAATGCTTCGTTTGCATTTGCATCCTATGGTCCGTATTGGAAGTTTGTTAGGAAGCTCAGCACCAACGAGCTCCTCAGCAGC…		MAIELVLFILFLVLVFLISRHFRVNHLLPPSPLALPIIGHFHLLSPLIHRSFHDLSLRLGPVYSLRLGSVPCVVVSSPEVAKEFLKTHELSFMNRTANIAAASMTYNASFAFASYGPYWKFVRKLSTNELLSSLSVDKFLPIRNQEYVRLLRLLAKKAEACEPVNLSEELPKVGHNIMGKMMLGKYSNDSRAARFRVVVRECTKIFGEFNFSDFNWIWKKFDVQGFQKRIDATHNKFDALVEEIIDEREELRKMKTNGGNNTGAEEKDVMGFLEVLLDKEEECKSTTKNFEVDFSRNHVKGLITDMFTASIDTTSITMEWALAEVINHPEVLKKAREEMDRAVGTERLVGEWDLPNLPYIQAILKETLRLHPPLPIVPRICTEECKVGKYVFPEKTLLF…
Fragaria vesca v1.1	mrna12151.1	FveCYP93B49	ATGGTGATCGAGTTAGTTCTATTCATCCTCTTCCTTGTTTTGGCTTTCCTAATCTCGAAACACTTTCGTGTGAACCACCTTCCTCCGAGCCCCTTTGCCTTGCCCATCATCGGCCATTTCCACCTCCTCAGCCCCCTCATCCACCGCTCATTCCATGACCTCTCCCGACGCTTAGGTCCCGTATTCTTTCTCCGCCTCGGTTCGCTCCCATGCGTCGTGGTTTCATCACCGGAGTTGGCAAAAGAGTTTCTCAAAACACATGAGCTCTCCTTCATAAACCGGTCTGAAACAACAGCAGTCGAAAGGATGACCTACAATGCTTCGTTTGCATTTGCTCCCTACGGCCCGTATTGGAAGTTCATTAGGAAGCTCAGCACCAACGAACTCCTCAGCGGCCGA…		MVIELVLFILFLVLAFLISKHFRVNHLPPSPFALPIIGHFHLLSPLIHRSFHDLSRRLGPVFFLRLGSLPCVVVSSPELAKEFLKTHELSFINRSETTAVERMTYNASFAFAPYGPYWKFIRKLSTNELLSGRSVDKFLPIRNQEYMRLIRLLAKKAKACEPVNLSEELPRVGHNIIGQMMLGKYSSASRAEKARLVVREATKIFGEFNFSDFNGIWKKLDLQGFQKRIDATHHKFDALVEEFIAEREELRKKNIDGGNSTSAEEKDVKGFLDVLLDKVEECKSSTENGEVEFSRNNVKGLITDLFSASIDTTSISMEWTLAELINHPEVLKKAREEIDRVVETGRLVGESDLPNLPYIQAIMKETFRLHPPLAFVARKCTQQSKVGKYIIPENTMLFV…
Fragaria vesca v1.1	mrna13987.1	FveCYP93B50	ATGGTAGCTGAGTTAGGCCTCCTCATCCTCTTCCTTGTTCTGTCCATCTTCATCTCAAAAAAATTCTTTGTGAAACACCATGGCGACCTTCCTCCAAGCCCCTTGGCCTTGCCCATCATCGGCCATTTCCATCTCCTCAGCCCTCTCATCCACCGTTCCTTCCACGACCTCTCTCTACGCTTCGGTCCCATATTCTCTCTACGCCTCGGCTCTGTCCCATGCATCGTGGTGACGTCGCCGGAGTTGGCAAAAGAGTTCCTCAAAACCCATGAGCTCTCCTTCATAAACCGCTCTGAGACAACTGCGGTCGAAAAAATGACCTACAATGCTTCCTTTGCATTTGCACCTTATGGAAATTACTGGAAGTTCACCAGGAAGCTGATCACGAACGAGCTCCTA…		MVAELGLLILFLVLSIFISKKFFVKHHGDLPPSPLALPIIGHFHLLSPLIHRSFHDLSLRFGPIFSLRLGSVPCIVVTSPELAKEFLKTHELSFINRSETTAVEKMTYNASFAFAPYGNYWKFTRKLITNELLGGRNVDNFLAIRNQEYMRFLRHLTKKAETCESINLSEELPRLGHNVIGQMMLGKYSSASRAEEMRVVVREATEIFGEFNFSDFNWIWKKFNLQGFQKRTEVTHKKFDVLVEKVISEREELRKMQKKGNITEEKDVKGFLDILLDIVEGESSENLDVEFSRDHIKGVITDLFAASIDTTSIAMDWTLAELINHPEVLKKAREEIDRVVGKGRLVGELDVPNLPYIQAIIKEAIRLHPPLTVVARKCVEQCKVGKYVIDKETMLFINN…
Fragaria vesca v1.1	mrna18199.1	FveCYP93B51	ATGGCACTTGAGGTACTCCTACTCTTTGCTTCTGGAATTATCTCTCTCCTTTTCTTCACTAGGAGTGTACTAAGCCACACTCACCGTGTTCAACACCTCCCTCCAAGCCCCTTAGCTTTGCCCATAATTGGCCACTTCCATATCCTTGGCCCTCTCATCCACCGCTCTTTCCAAGCCCTCTCGTTCCGGTTTGGTCCCATATTTTCTCTCCGTCTCGGCTCCGTCCCATGCATCGTCGTGACCTCGCCCGAGCTCGCAAAAGAGTTCCTCAAAACCCATGAACTCTCCTTCGCAACCCACGCTCAGTCCGCCGCCATCAAACGCATAACCTACGATTCTTCCTTGGCATTTTCGCCCTACGGACCATACTGGAAGTTTATCAAGAAGGTGACGGTGAAT…		MALEVLLLFASGIISLLFFTRSVLSHTHRVQHLPPSPLALPIIGHFHILGPLIHRSFQALSFRFGPIFSLRLGSVPCIVVTSPELAKEFLKTHELSFATHAQSAAIKRITYDSSLAFSPYGPYWKFIKKVTVNELLSSRSVGKFHSIRADGYSRLLRLLAERAESCLAVNLSEELPRLGHNIIGQMMLGKYSTSSSTERAEEARLVVREATRIFGELNLCDFNMVWKKLDLQGFGKRIEDTHLKFDELVEKVVKEREQLRIKNKKTNGGEEKDEEVKDFLSILLDMLEDESGESVEVGFSRVHIKALIMDLFTASTDTTAITMEWALAELINHPAVLEKAREEIDRVVGNERIVEESDGSNLPYIQAIIKETFRLHPPVPMVTRISVEDCKVGEYVIPT…
Fragaria vesca v1.1	mrna19166.1	FveCYP93B52	TTTTCTTTTTGTGGTGGGATTCTTATATTGTGGGGAGTATGAGAGTATAAGAGTTAATTGTGTGTTTAAAATTAGAAGTGTATATGTTTATTGCTGTTGTTGCTCACTTTTACAGGAAGTTATGCTAAATTTTAGTTATAATTTATTTTATAAATGAGTATGACTAGATTATGTTGAATAATTTATCTATATTTGACCGTTTTCAAATATTAAATTGCATAAAATATATATTTTTAATTAATAAATCTTAAAAAATACAAATCGCCTAGTCCCCGCCTAATCTTCGCCTAGGTTGTCCAGGCTCTAGGCTGTGGGTTACCGCCCGCCTAGCGCCTAGCGCCTTTTAGAACATTGAATAGTGGTAAAGTTGATGTACATATGGTAAATAAGTTGTTTGTG…		FSFCGGILILWGV*EYKS*LCV*N*KCICLLLLLLTFTGSYAKF*L*FIL*MSMTRLC*IIYLYLTVFKY*IA*NIYF*LINLKKYKSPSPRLIFA*VVQALGCGLPPA*RLAPFRTLNSGKVDVHMVNKLFV**SLLSSN*YITLCKFYCD*DKFFF*RKSGYPLY**SQPK*HRYKSQRIEVIHIPLHCTLSFIDDEPIKL*SSPT*R*YCMKFQSPRCSIAVR*DVFTI*M*KKHHKLQAPKPT*IPRNLHKDLLEIN**KLI*NLSGPKRWD*KTRNTKKRNIEWAQEQVTGPNSTSSERPNSSI*AQKSKNRPRHIFRFDNTASRDTQPV*DLHPPANEIDQPTRMTTLRSNKSSSSSNPIRLHDSASRFDQDTFKPPLTQTSEQEIPPSL*FR…
Glycine max Wm82.a2.v1	Glyma.12G067000.1	GmaCYP93B16	ATGATTTCTGAGTCCCTCTTGTTAGTATTCCTCATTGTCTTCATTTCTGCTTCCCTTCTCAAACTCTTGTTTGTGAGAGAAAACAAACCAAAGGCCCACTTGAAGAACCCACCAAGCCCACCTGCAATACCCATAATAGGTCATCTCCACCTCCTTAAACCCCTCATCCATCACTCATTCCGAGACCTCTCTCTCCGATATGGGCCCCTCCTAAGCCTTCGAATTGGTTCCGTTAAGTTCATAGTTGCAAGCACCCCATCACTCGCCCAAGAGTTTCTCAAGACCAACGAGCTCACATACTCTTCCCGCAAAATGAACATGGCCATCAACATGGTCACTTACCACAACGCCACGTTTGCGTTTGCACCTTACGACACTTACTGGAAGTTCATGAAAAAA…		MISESLLLVFLIVFISASLLKLLFVRENKPKAHLKNPPSPPAIPIIGHLHLLKPLIHHSFRDLSLRYGPLLSLRIGSVKFIVASTPSLAQEFLKTNELTYSSRKMNMAINMVTYHNATFAFAPYDTYWKFMKKLSTTELLGNKTLGHFLPIRTREVHDIIQFLFHKSKAQESVNLTEALLSLSNNVISQMMLSIKSSGTDSQAEQARTLVREVTQIFGEFNVSDFLGFCKNLDLQGFRKRALDIHKRYDALLEKIISDREELRRKSKVDGCEDGDDEKVKDFLDILLDVAEQKECEVQLTRNHVKSLILDYFTAATDTTAISVEWTIAELFNNPKVLKKAQEEVDRVTGNTQLVCEADIPNLPYIHAIIKETMRLHPPIPMIMRKGIEDCVVNGNMIPK…
Glycine max Wm82.a2.v1	Glyma.12G067100.1	GmaCYP93B19	ATGATATCTGAGTCCCTCTTGTTAGTATTCCTCATTGTCTTCATTTCTGCTTCCCTTCTCAAACTCTTGTTTGTGAGAAAAAACAAACCAAAGGCTCACTTGAAGTACCCTCCAAGCCCCCCAGCAATACCCATAATAGGTCATCTCCACCTCCTTAAACCACTCATCCATCACTCATTCCGAGACCTTTGTCTCCGATATGGGCCCCTCCTAAGCCTTCGAATTGGTTCCGTTAAGTTCATAGTTGCAAGCACCCCATCACTCGCCAAAGAGTTTCTCAAGACCAACGAGCTCACATACTCTTCCCGCAAAATGAACATGGCCATCAACACGGTCACCTACCACAACGCCACTTTCGCGTTTGCACCTTACGACACTTACTGGAAGTTCATGAAAAAA…		MISESLLLVFLIVFISASLLKLLFVRKNKPKAHLKYPPSPPAIPIIGHLHLLKPLIHHSFRDLCLRYGPLLSLRIGSVKFIVASTPSLAKEFLKTNELTYSSRKMNMAINTVTYHNATFAFAPYDTYWKFMKKLSTTELLGNKTLGHFLPIRTQEVHDFIQILFHKSKAQESVNLTEALLRLSNNVISRMMLSIKSSGTDSQAEQARALVREVTRIFGEFNVSDFLGFCKNMDLQSFRKRALDIHKRYDALLEKIISDREELRRKSKEEGCEDGGDEKVKDFLDILLDVSEQKECEVQLTRNHVKSLILDYFTAATDTTAISVEWTIAELFNNPKVLKKAQEEVEKVTGNKRLVCEADISNLPYIHAIIKETMRLHPPIPMITRKGIEDCVVNGNMIPK…
Theobroma cacao v1.1	Thecc1EG036450t1	TcaCYP93B53	ATGATGCTTGAACTCCTGTCGTATGCCATCCTCTTCATTGCTTCATTTCTTATTGTGAAAACAATAATCTACAACAAGAGCCGTCCCAAGCTTCCCCCAGGCCCAATTGCCTTACCTATCATCGGCCACCTCCACCACCTCGGTCCCTTCCTTCATCAAACTTTCCACAAGCTCTCGTCCCGCTATGGTCCCTTAATTTATCTCCGACTTGGCTCTGTTGGGTGCGTCGTGGCTTCTAACCCAGAGCTTGCAAAAGAGTTTCTGAAAACTTACGAGCTGACGTTCGCTAACCGCAAGCAAACCGCTGCCATTAACCACCTTACATACAACTCTTCCTTTGCTTTCGCCCCCTACGGACCTTACTGGAAATTCATAAAAAAGTTAAGCACCAACGAGCTC…		MMLELLSYAILFIASFLIVKTIIYNKSRPKLPPGPIALPIIGHLHHLGPFLHQTFHKLSSRYGPLIYLRLGSVGCVVASNPELAKEFLKTYELTFANRKQTAAINHLTYNSSFAFAPYGPYWKFIKKLSTNELLGNRTLSQFLPVRTKELHHFMEFLLEKSKAGESVNVTQELLKLTSNIISEMMLSMKCSGSGNSTDGVQTIVREVTEIFGEFSISDIIWFCKNWDLQGFRRRFEDIHRRYDALLERIIRDREEVRKSKKKGRNECYQGDNVDEVKDFLDMMLDVLENDNSEMQLTRNHIKACIMDFLTAATDTAAIALEWALAELINHPDVLKIAQEEIDQVVGKSRLVEESDNPRLLYIHAIIKETFRLHPPIPMINRKSVQSCQIKGYTIPADSL…
Theobroma cacao v1.1	Thecc1EG036577t1	TcaCYP93B54	ATGATGCTTCAACTCCTGTCGTATTCCACCCTCTACATTGCTTCGTTTTTTCTGGTGAAAACAATATTAATCTCCATCAACAACCGTCCCAAGCTTCCCCCAGGCCCCATTGCCTTACCAGTCATCGGCCACCTCCACCTCCTTGGCCCCTTCATTCATCAAACTTTCCACAAGTTCTCCTCCCGCTATGGTCCCTTAATGTATCTCCGTCTTGGCTCTATTGGGTGCGTCGTGGCCTCTAACCCAGAGCTTGCAAAAGAGCTTCTCAAAACTTACGAGCTGGCATTCGCCGCCCGCATGCACACCGCTGCCATTACCCACCTTACATACGACTCTTCCTTTGCCTTTGCACCCTACGGACCTTACTGGAAATTCATAAAAAAGTTTAGCACCTATGAG…		MMLQLLSYSTLYIASFFLVKTILISINNRPKLPPGPIALPVIGHLHLLGPFIHQTFHKFSSRYGPLMYLRLGSIGCVVASNPELAKELLKTYELAFAARMHTAAITHLTYDSSFAFAPYGPYWKFIKKFSTYELLGNRTLSQFLPVRTKELHRFIKFLLDRSKAGESVNVTQELLKLTNNTISQMMLSMRCSGSGNPADGVRALVREVTEIFGEFNISDSIWFCKSWDLQGFRRRFEDIHRRYDALLERIIRDREEVRKSKKECDQRDNGNEVKDFLDMMLDVLENDNSEMQLTRNHIKALVLDFLTAGTDTTAIVLEWALAELINNPEVLKLAQKEIDQVVGTSRLVEESDSPRLQYIQAIIKETFRLHPPVPMISRKSIQSCKIKGYTIPADCLVFV…
Gossypium raimondii v2.1	Gorai.013G141500.1	GraCYP93B35_D	ATGGTTCTTCAGTTGGCTATGGAGCTCCCATTCTTATCATATGCCGCACTGTTCATTGTTTCATTTCTTATAGTTAGAACGGTGATTTCCATTAGAAATCGTTCCAAGCTTCCGCCAGGTCCAACGGCGTTACCGGTCATCGGCCACCTCCATCTCCTCAGTCCCTTCATTCATCAAACTTTTCAGAAGCTCTCATCCATCCATGGCGCCTTGATGTATCTCCGCCTAGGGTCCGTCGAGTGCGTTGTGGTCTCTAACCCTGAGCTTGCCAAAGAGCTTCTCAAGCATCACGAGCTCACCTTCTCCGCCCGCAAGCACACCGCTGCTATTGACCATCTTACTTACAACTCTTCCTTCGCTTTCGCACCCTACGGAACTTACTGGAAATTCATCAAAAAG…		MVLQLAMELPFLSYAALFIVSFLIVRTVISIRNRSKLPPGPTALPVIGHLHLLSPFIHQTFQKLSSIHGALMYLRLGSVECVVVSNPELAKELLKHHELTFSARKHTAAIDHLTYNSSFAFAPYGTYWKFIKKLSTFELLGNRTLGQFLPVRTKELHHFISILLDKSKSSETVNLTEELLKLTNNVISQMMMSIRCSGTGDQADGVRTLVREVTEIFGEFNVSDIIWFFKNIDVQGFRKRFLDIHSRYDSLLEKIMRDREELRENKKPNDDDVKDFLDMMLDVFEDEHSEIQLTRNHIKALILDFLTAATDTTAIAVEWALAELINNPETLRKAQQELDQVVGTSRLVQEFDTQRLPYLQAIIKESFRLHPPIPMISRKAVEDCKINGYTIPAQSLLFV…
Populus trichocarpa v3.0	Potri.005G037100.1	PtrCYP93B8	ATGATGCTTGAGCTCATAGGTTTTGCCATTCTGTTGCTTTCAATTTTCTTGATCTTCACAAACAGACCAAGGCATGCCTGTTTTCCTCCAGGTCCCCGGTCTTTACCAATCATCGGTCACCTCCATCTCCTTGGACCCCTAATTCACCATTCCTTTCGTGATATATCTTCTCGTTATGGTCCCTTAATTTTTCTCCGTCTTGGTTCTGCCCCATGTGTCGTGGCTTCCTCCCCCGAACTTGCTAAAGAATTCCTAAAGATACACGACGTCATCTTCTCTTCTCGCGAAATGGATTCTCGAGCCATTAAGCTCCTTACCTATAACTCTTCCTTTGCCTTTGCACCCTATGGACCTCTCTGGAAATTCCTCAAGAGGTTGAGCACATTTGAGCTCTTAAGC…		MMLELIGFAILLLSIFLIFTNRPRHACFPPGPRSLPIIGHLHLLGPLIHHSFRDISSRYGPLIFLRLGSAPCVVASSPELAKEFLKIHDVIFSSREMDSRAIKLLTYNSSFAFAPYGPLWKFLKRLSTFELLSSRALNHFQPVRKIELQQFLQNLLTKSKISESVNVTQELLNLSNNIISQMMLSIRCSGSDSQGEDAKTLAREVTQIFGEFNVSDFIWLCRNFDFQGSRKKSEDVHTRFDALLDNIITNRELERKQSGGKVQARDLLDMMLDTLEAQNSEIEFTRDHIKALVLDFLTAGTDTTAASTEWALAELINHPKILEKARQEIDAVVGNKRLVEESDFPNLPYLQAIFKETFRLHPPIPMISRKSTQECKINGYTIPANSLLFVNMWSIGRDS…
Populus trichocarpa v3.0	Potri.005G037200.1	PtrCYP93B33	ATGATGCTTGAGCTCATAGGTTTTGCCATTCTGTTGCTTTCAATTTTCTTGATCTTCACAAACAGACCAAGGCATGCCTGTTTTCCTCCAGGTCCCCGGTCTTTACCAATCATCGGTCACCTCCATCTCCTTGGACCCCTAATTCACCATTCCTTTCGTGATATATCTTCTCGTTATGGTCCCTTAATTTTTCTCCGTCTTGGTTCTGCCCCATGTGTCGTGGCTTCCTCCCCCGAACTTGCTAAAGAATTCCTAAAGATACACGACGTCATCTTCTCTTCTCGCGAAATGGATTCTCGAGCCATTAAGCTCCTTACCTATAACTCTTCCTTTGCCTTTGCACCCTATGGACCTCTCTGGAAATTCCTCAAGAGGTTGAGCACATTTGAGCTCTTAAGC…		MMLELIGFAILLLSIFLIFTNRPRHACFPPGPRSLPIIGHLHLLGPLIHHSFRDISSRYGPLIFLRLGSAPCVVASSPELAKEFLKIHDVIFSSREMDSRAIKLLTYNSSFAFAPYGPLWKFLKRLSTFELLSSRALNHFQPVRKIELQQFLQNLLTKSKISESVNVTQELLNLSNNIISQMMLSIRCSGSDSQGEDAKTLAREVTQIFGEFNVSDFIWLCRNFDFQGSRKKSEDVHTRFDALLDNIITNRELERKQSGGKVQARDLLDMMLDTLEAQNSEIEFTRDHIKALVLDFLTAGTDTTAASTEWALAELINHPKILEKARQEIDAVVGNKRLVEESDFPNLPYLQAIFKETFRLHPPIPMISRKSTQECKINGYTIPANSLLFVNMWSIGRDS…
Linum usitatissimum v1.0	Lus10040868	LusCYP93B55	ATGATCGTCGAGCTCCTCTCCCTACTAGCCGTACTTTCCTTCTTCGCCCTAAACCTAGCTCGAAATGCTCGAAAAGACAAGAACCTCCCTCCAGGACCCATGTCCCTTCCGGTCATCGGCCATCTCCACCTCATCGGACCACTAATTCACCACACCTTCCACGACCTCGCCTCGCGCTATGGCCCGCTCATGAACATCAAGCTCGGATCCATCTCGGCCATCGTTGTCTCCTCTCCGGACCTGGCTCGCGAGTTCCTCAAAACCCACGAGATCAACTTCTCGATGCGGGCCAGCACCATCGCCATCGACTACCTCACCTACAACAACATCTCCTTTGCCTTCGCACCCTACGGAGCTTACTGGAAGTTCATCAAGAAGATAAGCACGTTCGAGCTCCTC…		MIVELLSLLAVLSFFALNLARNARKDKNLPPGPMSLPVIGHLHLIGPLIHHTFHDLASRYGPLMNIKLGSISAIVVSSPDLAREFLKTHEINFSMRASTIAIDYLTYNNISFAFAPYGAYWKFIKKISTFELLGNRMLNQFRPIRTEELHSLLELLGQKSQSRGKVNLSQELLRFANNVICQMMLGMRASGTEGQAEVARGLARDVTQIFGEFNVSDFVWFLKKWDVQGFKRRSEDIRRRFDNLLEGIVAEREKVRADERRRSDAGGNKREAVDFLDLMLDVIEDEDAEIKLTRDHVKALVLDFFTAGTDTSAASLEWALSELINHPKVLRKAREEIDRVVGPTRLVEESDGPNLIYIHAVIKEAFRLHPSIPMITRKCVQECEIGGYRIPLNSMLFVN…
Manihot esculenta v4.1	cassava4.1_005469m	MesCYP93B56	ATGGTCGCAGAGCTCTCCTTGTTCGCCATTCTATTGTTTTTAGTTTTCTTCGCAAGAAAACAAAGGCACCGCCGCCGCCAGCTTCCTCCAAGCCCTATGGCTTTGCCGATAATAGGTCACCTTCATCTTCTCGGACCCTTAATCCACCATTCCTTTCGAGACATCTCTTCTCGTTATGGCCCTCTTATTTATCTCAGGCTTGGTTCTGTGTCAGCCGTCGTAGCTTCCACCCCAGAACTCGCCAAACAACTCCTCAAAACACATGAATTCACATTCTCTTCTCGCAAGCACTCTATCGCAATCGATCGCCTCACCTACAACTCCTCTTTCGCCTTCGCTTCCTATGGACCTTACTGGAAATTCATCAAAAAGATCAGCACTTTTGAGCTCTTAGGAAAC…		MVAELSLFAILLFLVFFARKQRHRRRQLPPSPMALPIIGHLHLLGPLIHHSFRDISSRYGPLIYLRLGSVSAVVASTPELAKQLLKTHEFTFSSRKHSIAIDRLTYNSSFAFASYGPYWKFIKKISTFELLGNRMINQFLPIRKQELHRFLGVFYSKSKAGESVNITQELIKLSNNIISQMMLSMRSSSSDGEAETVITVVREVTQIFGEFNISDVIWFCKNIDFQGVRKRVEDIYFKYDGLLEKLITSREELRKKNRSNGVVHEARDFLDIMLDVMEDENAEIKLTRNHIKALFLDFFTAATDTTAITIEWALAELINQPRILEKAREEINSVVGNGRIIQESDNSNLPYIQAILKETFRLHPPIPMIARKSIQDCKINGYTIPANTLLFVNMWSIGR…
Manihot esculenta v4.1	cassava4.1_007267m	MesCYP93B57	ATGCATCTTCGCCTTGGTTCAGTCCAGTCTGTTGTAGTCTCCAACCCTGAAATGGCTAAAGAATTTCTCAAGACCCATGATCTTACATTCTCTTATCGCATATTCAACCAAGCCATCGATTATCTTACTTATAATGCTGCGACTCCACTGGCACCCTATGGCTCTCTCTGGATTTTCATTAAAAAACTGAGCATTTCTGAGCTCTTAGGCAGCCATACTCTCAACAAGTTTCTTCCTGTAAGAACCCAAGAGTTGCATTCTTTTCTTGGACTATTATTCGATAAGTCCAAATCAGGCGAGAGTGTTAATGTCACAAAGGAGATATTAAGATTCACAAACAACATAATCTCTCAGATGATACTAAGTTCAAGGCGTTCATCGACGGCCGATGAGGATGAA…		MHLRLGSVQSVVVSNPEMAKEFLKTHDLTFSYRIFNQAIDYLTYNAATPLAPYGSLWIFIKKLSISELLGSHTLNKFLPVRTQELHSFLGLLFDKSKSGESVNVTKEILRFTNNIISQMILSSRRSSTADEDEEAIKLVREVTAVFGEFNISDFIWFLRNWDLQGFRKKLEGIRGRYDVLLEKIITKRQEERKEKNYRSENGSAKDFLDLLLDIMEDKNSEMQLSRDHLKGLVMDYLTAGTDSTAVAIEWAVAEMINHPMELKKAREELERVVGKQRLVQESDVSNLPYLQAIIKETFRLHPPIPLILRSSIEECKVKDYTISKGTLLIVNLWSIGRDPETWKNPLEFRPERFLPASGNDQSYWAGPVDVRGQHYQLLPFGTGRRNCSGMSSAMQILPI…
Citrus clementina v1.0	Ciclev10019810m	CclCYP93B26	ATGACACTTCAACCACTGATTTTTTATGCTTCCCTCTTCATCTTGTCCGCCCTAGTGCTGAAAGCCATCAAACACTCACGGCGACTGCCACCGAGCCCGTGGGCCTTGCCGATCGTCGGGCACCTCCATCTCCTCGGCCCTTCCCTTCACCATTCTTTTCACAAGCTTTCAACTCGTTATGGCCCCTTGATGTCCGTACGCATAGGCTCTGTCCTAGGTGTTGTAACTTCTTGTCCTGATGTAACCAAAGAGCTTCTCAAAACAAATGATGTTACTTTTACCGGCCGGAAAAGCTCTGCCGCCATTGAATGCCTTACATATAACTCTTCTTTTGCTTTCGCTCCCTATGGCCCATATTGGCGATTCATGAAAAAGCTGTCCGCAGTTGAGCTCTTGGGC…		MTLQPLIFYASLFILSALVLKAIKHSRRLPPSPWALPIVGHLHLLGPSLHHSFHKLSTRYGPLMSVRIGSVLGVVTSCPDVTKELLKTNDVTFTGRKSSAAIECLTYNSSFAFAPYGPYWRFMKKLSAVELLGSRTLHQFLPVRTNELRELIRFLFEKSKSGQSVNITDELLRFANNIISQMMLSIRCSGKGGQAEECRTLAREVTEIFGEFNISDIIWIFKSFDIQGFNRRFKDIHRRYDSQLENIITNREKLRKEKKESEEKVKDLLDILLDVLENQNSEIKLTRDHVKALCVDFLTAGTDTSSTSLEWSLAELINHPMVLQEAQQELDQVVGRNRLVQESDVPHLPYIQAIIKESFRIHPPIPLISRKAVEDCKIGNYVIPKDTVLFVNLWSMGRD…
Citrus clementina v1.0	Ciclev10019811m	CclCYP93B27	ATGACACTTCAACCACTGATTTTTTATGCTTCCCTCTTCATCTTGTCCGCCCTCGTGCTGAAAGCCATCAAACACTCACGGCGACTGCCACCGAGCCCGTGGGCCTTGCCGATCGTCGGGCACCTCCATCTCCTCGGCCCTTCCCTTCACCATTCTTTTCACAAGCTTTCAACTCGCTATGGCCCCTTGATGTCCATACGCATAGGCTCTGTCCTAGGTGTTGTAACTTCTTCTCCTGATGTAACCAAAGAGCTTCTCAAAACAAATGATGTTACTTTTGCCGCCCGGAACAGCTCTGCCGCCATTGAATGCCTTACATATAACTCTTCTTTTGCTTTTGCTCCCAACGGCCCATATTGGCAATTCATGAAAAAGCTGACCACAGTTGAGCTCTTGGGC…		MTLQPLIFYASLFILSALVLKAIKHSRRLPPSPWALPIVGHLHLLGPSLHHSFHKLSTRYGPLMSIRIGSVLGVVTSSPDVTKELLKTNDVTFAARNSSAAIECLTYNSSFAFAPNGPYWQFMKKLTTVELLGSRTLLQFLPIRTNELHELIRFLFEKSKSGGSVNITDELLKFTNNIISQMMLSIRCSGKGGQAEECRTLAREVTEIFGEFNISDVIWVFKSFDIQGFRRRFKDIHRRFDSLLENIITNREKLRKEKKESEEKVKDLLDILLDVLENQNSEIKLTRDHIKALFLDFLTAGTDTSSMTVEWALAELINHPMVLQKAQQEIDQVVGRNRLVQESDVPHLPYIQVIIKESFRIHPPIPLLNRRALEDCKIGNYIIPKGTLLFVNLWSMGRD…
Eucalyptus grandis v1.1	Eucgr.B02410.1	EgrCYP93B58	ATGATCGCCCTCAAGCGGAGGCCCAATCTCCCTCCCAGCCCCAAGGCATTGCCGGTCCTCGGCCACCTCCACCTCCTCAGCCCCCTCATCCACCGCTCCTTCCGCGACTTCGCGGCCCGCCTCGGCCCGCTGTTCAGCCTCCGCCTCGGGTCGGTGCTGTGCGTCGTGGCCTCGACCCCCGACCTCGCGCGGGAGCTCCTCAAGACGCACGAGCTGACGTTCTCGGCACGCAAGCACAACGCGGCCATCGACCACCTGACCTACCAGTCGGCTTTCGCGTTCGCGCCTTACGGGCCGTACTGGAAGTTCATCAAGAAGCTGAGCCAGACCGAGCTCCTTGGGGCTCGCACCCTCAACCAGTTCCTCCCCATCCGCACCAGCGAGCTCCAGCACTTCATC…		MIALKRRPNLPPSPKALPVLGHLHLLSPLIHRSFRDFAARLGPLFSLRLGSVLCVVASTPDLARELLKTHELTFSARKHNAAIDHLTYQSAFAFAPYGPYWKFIKKLSQTELLGARTLNQFLPIRTSELQHFIRVLHDKSLRRESVNVTQELVKYANNIISQMMLSIRSSGVDSQADEARTLIREVTQIFGEFNVSDFIWFCKNVDFQGYKKRFEDIHRRYDVLLEKIMRDREELRRKKRMQRAEEGGRKDEVKDFLDMMLDIYEDENSEMKLTREHIKALVLDIFTAGTDTSATSVEWALAELINNPMVLKKAREEISSVVGDQRLVNESDVKSLPYIQAIIKEALRLHPPIPMVARKSVQECHIRGYVIPKDTLLFVNIWAIARDPKVWANPLQFSP…
Citrus sinensis v1.1	orange1.1g010779m	CsiCYP93B27	ATGACACTTCAACCACTGATTTTTTATGCTTCCCTCTTCATCTTGTCCGCCCTCGTGCTGAAAGCCATCAAACACTCACGGCGACTGCCACCGAGCCCGTGGGCCTTGCCGATCGTCGGGCACCTCCATCTCCTCGGCCCTTCCCTTCACCATTCTTTTCACAAGCTTTCAACTCGCTATGGCCCCTTGATGTCCATACGCATAGGCTCTGTCCTAGGTGTTGTAACTTCTTCTCCTGATGTAACCAAAGAGCTTCTCAAAACAAATGATGTTACTTTTGCCGCCCGGAACAGCTCTGCCGCCATTGAATGCCTTACATATAACTCTTCTTTTGCTTTTGCTCCCAACGGCCCATATTGGCAATTCATGAAAAAGCTGACCACAGTTGAGCTCTTGGGC…		MTLQPLIFYASLFILSALVLKAIKHSRRLPPSPWALPIVGHLHLLGPSLHHSFHKLSTRYGPLMSIRIGSVLGVVTSSPDVTKELLKTNDVTFAARNSSAAIECLTYNSSFAFAPNGPYWQFMKKLTTVELLGSRTLLQFLPIRTNELHELIRFLFEKSKSGGSVNITDELLKFTNNIISQMMLSIRCSGKGGQAEECRTLAREVTEIFGEFNISDIIWIFKSFDIQGFRRRFKDIHRRFDSLLENIITNREKLRKEKKESEEKVKDLLDILLDVLENQNSEIKLTRDHIKALFLDFLTAGTDTSSMTVEWALAELINHPMVLQKAQQEIDQVFGRNRLVQLKNHLPYIQAIIKESFRIHPPIPLISRKAVEDCKIGNYVIPKDTVLFVNLWSMGRDPK…
Ricinus communis v0.1	29788.m000323	RcoCYP93B22	ATGATATTCGAGCTCTTATCTTCCTTTGCTTTCATCCTTTTCATTGTTATTTACTTCATACAGAAAAAGCAATGGCAGAATCTTCCTCCAAGTCCTACAGCCTTACCAATAATAGGTCATCTTCATCTTCTTAGACCTTTAATCCACCATTCTTTTCGTGACATATCTTCGCGTTATGGTCCATTAATCTATCTCAAGCTCGGTTCTGTTCCATGTGTTGTAGCTTCAACACCTGAACTAGCTAAAGAATTCTTGAAGACACATGAGCTTACGTTTTCCGCAAGAAAACGTTCCATTGCCATTGACCATCTTACCTATAATTCTTCTTTTGCATTTTCACCCTATGGTCCTTACTGGAGATTTATTAAAAAGATTAGTGCTTTTGAGCTTCTTGGAAAT…		MIFELLSSFAFILFIVIYFIQKKQWQNLPPSPTALPIIGHLHLLRPLIHHSFRDISSRYGPLIYLKLGSVPCVVASTPELAKEFLKTHELTFSARKRSIAIDHLTYNSSFAFSPYGPYWRFIKKISAFELLGNRMLNQFLPIRRKELLHFLQGFYAKSKAGESVNVTHELVKLSNNIISQMMLSMSSCETESEAEIARTVIREGFRKRIDHTFNKYDGLLEKLITEREKQRKKNKSDGVKHEAMNFLDIMLDVMEDETAEMKLTRDHIKALLLASLFFYLDFLTAATDTTAVTLEWALAELINQPQVLAKAREEINRVIGNERIVQESDNPNLPYIQAILKETFRLHPPIPMVARKSIQDCKISGYKIPANCLLFVNMWSIGRDPKYWKNPLQFEPERF…
Populus trichocarpa v3.0	Potri.013G027000.1	PtrCYP93B7	ATGATTTTTGAGCTTATAATAGCTGGTTTTGCCGTTCTTCTGCTTACAGTCTTCATCTTAACCAATAAAGGGCATGGCTCCCTTCCTCCTGGTCCAGTGCCTTTACCAATCATTGGTCATCTCCATCTTCTTCAACCCCTAATTCACCGTTCTTTTCGTGATTTATGTTCTTGTTATGGTCCCATAATCTATCTCCGCCTTGGTTCTGTCCCTTGTGTTGTGGCTTCCACACCAGAACTCGCTAGAGAACTCCTCAAGACAAACGACCTCACCTTCTCTTCCCGCAAGCATTCTTTAGCCATTGATCACCTTACCTATAGCTCTTCTTTTGCCTTTGCACCCTATGGACCTTATTGGAGATTCATCAAAAAGTTGAGCACGTTCGAGTTCTTGGGTAAC…		MIFELIIAGFAVLLLTVFILTNKGHGSLPPGPVPLPIIGHLHLLQPLIHRSFRDLCSCYGPIIYLRLGSVPCVVASTPELARELLKTNDLTFSSRKHSLAIDHLTYSSSFAFAPYGPYWRFIKKLSTFEFLGNRALNQFLPVRRKELRQFIGVLHDKSEVCESVNVTEELLNLSSNIISQIILSLRCSGTDNEAEGVRTLVREVTQIFGEFNVSDFIWFCRNLDFRGYRKKFEDVHRRYDALLENIITNREIERKKSGGEYKVKDLLDMMLDALEDKSSEVELTREHIKALVLDFITAATDTTAAATEWALAELINNPKVLEKARQEIDTVVGNKRLVEESDSPNLPYIQAIIKETFRLHPPIPMITRKSIQESKINGYTIPKNTMLFVNIWSIGRDSR…
Linum usitatissimum v1.0	Lus10005878	LusCYP93B59	ATGATCGTCGAGCTTCTCTCCCTCCTAGCCATACTCGCCTTCTTCGCCCTAACCCTAGCTCGAAATGCACGAAACAACAAAGACCTCCCTCCGGGACCCATGTCCCTTCCGGTCATCGGCCATCTCCACCTCATCGGACCACTAATCCACCACACTTTCCACGACCTCGCCTCACGCTATGGCCCGCTCATGAACATCAAGCTCGGCTCCATCTCGGCCATCGTGGTCTCCTCTCCGGACCTGGCTCGCGAATTCCTCAAAACCCACGAGATCAACTTCTCGATGCGGGCCAGCACCATTGCCATCGACTACCTCACCTACAACAACATCTCCTTCGCCTTCGCACCCTACGGGGCTTACTGGAAGTTCATCAAGAAGATAAGCACGTTCGAGCTCCTT…		MIVELLSLLAILAFFALTLARNARNNKDLPPGPMSLPVIGHLHLIGPLIHHTFHDLASRYGPLMNIKLGSISAIVVSSPDLAREFLKTHEINFSMRASTIAIDYLTYNNISFAFAPYGAYWKFIKKISTFELLGNRMLNQFRPIRTEELHSLLKFLGQKSQNCEKVNLSQELLRFANNVICQMMLGMRASGTDGQAEVARGLARDVTQIFGEFNVSDFVWFLKKWDVQGFKRRSEDIRRRFDNLLEGIVSEREKVRAEERRRSGAGGKKREAVDFLDLMLDVIEDEDAEIKLTRDHVKALVLDFFTAGTDTSAASLEWALSELINHPKVLRKAREEIDRVVGETRLVEESDGPNLVYIHAVIKEAFRLHPSIPMITRKCVQECEIGGYRIPLNSMLFVN…
Cicer arietinum v1.0	Ca_16721	CarCYP93B60	ATGAATATAGCTATCAACATGGTTGTTTACGACGACGCAACTTTTGCTTTCGCCCCTTATGGGACATATTGGAAATTCATGAAAAAACTTAGCACAATTGAGCTCTTGGGAAATCGAACCATCAAACAATTTGCCTCGGTTCGAACCCAAGAACTCCACAATTTCATTCAAACTTTGGCAAATAAGTCTAATTCTGAAGAAAGCTTGAACCTTACTCAAGCTTTGGTAAAACTTTCTAACAACTTAATATCGCGGATGATGTTGAGCATTGAGACCTCGGGAACCAATAGCCAAGCTGAAGAAGCGAGGATATTGGTTCGCGAGAGGGCAATGGACATACATAGAAGGTATGATGCTTTTTTGGAGAAGATTATTTATGATCGAGAGGAATTGAGAAAG…		MNIAINMVVYDDATFAFAPYGTYWKFMKKLSTIELLGNRTIKQFASVRTQELHNFIQTLANKSNSEESLNLTQALVKLSNNLISRMMLSIETSGTNSQAEEARILVRERAMDIHRRYDAFLEKIIYDREELRKKEMVEGRGNEEERMKDFLDILLDVYEEKDCEVNFTRNHIKSLILDYFTAGTDTTATSVEWTITELFNNPSVLKKAQKEVDTIVGNERLVNEADTPNLPYINSIIKETMRLHPPIPMIMRKGVKDCVVDGNIIPKDSIVCVNIWAMGRDQKIWNNPLEFRPERFLEYGEGSDIDIKGHNFELLPFGSGRRGCPGMPLAMHQLPTVIAALVQCFDWKMLDSEGTILEYGKMIDMNERPGLTVPRANDLICIPVARFNPTTFLHV*
Medicago truncatula Mt4.0v1	Medtr1g107295.1	MtrCYP93B12	ATGATTTCCCATTCCTTCTCATTAGCTATGATTTTGCTCCTATTTCTTTTCATTTTTCAGCTTCTCTCTTACTTAAAGAGAAACAAGAAGTTGCATGCACGATTACCACCTCACCCTCCAAGTCCACCAGCAATACCAATAATTGGACATCTTCATCTCCTCAAACCACTCATTCATCAGGCCTTTCGCCACCTCTCCGATCAATATGGCCCTTTAATATCCCTTCGACTTGGCTCCTCTCAATTTATCATTGTTAACACTCCATCACTCGCCAAAGAGTTTCTCAAGACACATGAGCTCACTTATTCTCACCGTAAAATGAGCATAGCCATCAACGTAGTTGCCTATGATGATGCAACTTTTGCTTTCGCTCCTTATGGGACTTATTGGAAATTTATT…		MISHSFSLAMILLLFLFIFQLLSYLKRNKKLHARLPPHPPSPPAIPIIGHLHLLKPLIHQAFRHLSDQYGPLISLRLGSSQFIIVNTPSLAKEFLKTHELTYSHRKMSIAINVVAYDDATFAFAPYGTYWKFIKKLSTTELLGNRTMAQFLPIRTQELHEFIQTLANKSKAEESVNLTQALIKLSNNIISRMMLSIDCSGTDNQAEQVRALVREVTQIFGEFNVSDFIGIFKNFDLQGFKKRALDIHKRYDALLDKIISDREELRREAKLIDGGGENGEEERLKDFLDILLDVYSEKNCEVNFTRNHIKSLILDYFTAATDTTAISVEWAISELFNNPRVLKKAQEEVDIVTRKERLVCEEDGPNLPYIHAIIKETMRLHPPIPMIMRKGMEDCVVDGN…
Medicago truncatula Mt4.0v1	Medtr4g062500.1	MtrCYP93B28	ATGATTTCTCAGCCAATCTTATTAGCTTTGATTCTATTCCTCCTCTTCCTTCTCCAACTCTTTTTGTTTAAGAGAAACAACAGAGCAAAGGAGCACTTACCTTACCCTCCAAGTCCACTAGCAATACCAATAATTGGTCATCTTCATCTCCTCAAACCCCTCGTTCATCAAGCCTTTCGCGACCTCTCTGATCGATATGGACCCCTTATATCCCTTCGACTTGGTTCTGTTCCATTTATCGTTGTTAGTTCCCCATCACTCGCAAAAGAGTTTCTCAAAACAAACGAGCTTGTTTATTCTTCCCGTAAAATGAACATTGCCATCAACACAGTTGTCTACGATGATGCTACTTTTGCTTTTGCCCCTTATGGGGCATATTGGAAATTCATCAAAAAGCTT…		MISQPILLALILFLLFLLQLFLFKRNNRAKEHLPYPPSPLAIPIIGHLHLLKPLVHQAFRDLSDRYGPLISLRLGSVPFIVVSSPSLAKEFLKTNELVYSSRKMNIAINTVVYDDATFAFAPYGAYWKFIKKLSTFELLGNRTIGQFLPIRTRELNEFIQTLENKSKVEESVNLTQALLKLSNNIISRMMLSIESSGTDSQAEQARTLVRDVTQIFGEFNISDFIGFCKNLDFQGLKKRALDIHKRYDAFLEKLICDREESRRKAKVEGGCEDRDEKVKDFLDMLLDVFEAKECEVDFTRNHIKSLILDYFTAATDTTAISLEWTIAELFNNPIVLKKAQEEVERIIGKERLVCEADIPNLPYIQAIIKETLRLHPPLPMIARKGTKDCVVDGKMIKKG…
Medicago truncatula Mt4.0v1	Medtr4g062510.1	MtrCYP93B31	ATGATTTCTCATTCCTTCTTATTAGCTATGATTGTGCTCCTTCTTCTTTTCCTTCTCCCACTTTTCTCCGTCTTTAAGAGAAACAAGAAATCACAACCACATTTACCCCTCCCTCCAAGTCCACCAACAATACCAATAATTGGACATCTTCATCTCCTTAAACCACTTATTCATCATGCCTTCCGCGACCTCTCTGAGCGATATGGACCTCTTATATCCCTTCGACTTGGCTCTGCTCGATTTATAGTTGTTAACACTCCATCACTCGCCAAAGAGTTTCTCAAGACACATGAGCTCACTTATTCTCACCGTAAAATGAGCATAGCCATCAACGTAGTTGCCTATGATGATGCAACTTTTGCTTTCGCTCCTTATGGGACTTATTGGAAATTTATTAAA…		MISHSFLLAMIVLLLLFLLPLFSVFKRNKKSQPHLPLPPSPPTIPIIGHLHLLKPLIHHAFRDLSERYGPLISLRLGSARFIVVNTPSLAKEFLKTHELTYSHRKMSIAINVVAYDDATFAFAPYGTYWKFIKKLSTTELLGNRTIGQFLPIRTQELDEFIQTLTNKSKARESLNLTQALIKLSNNIISRMMLSIDCSGTDNQAEQVRALVREVTQIFGEFNVSDFIGFFKNFDLQGFKKRALDIHKRYDALLDKIISDREELRREAKLIDGGGENGEEERLKDFLDILLNVFEEKDLEVNFTRSHIKSLILDYFTAATDTTAISVEWAISELFNNPRVLKKAQEEVERVVGKERLVCEEDSPNLPYIHAIIKETMRLHPPIPMIMRKGMEDCVVDGKM…
Medicago truncatula Mt4.0v1	Medtr7g027960.1	MtrCYP93B10	ATGGAACCTCTACTATTGGCCTTCACATTATTTCTTTCATCACTCATTTGCTACATTATTTTCCAGCCAATTTTAAACCGTCAAAAAAACCTCCCTCCATCTCCTCTATTCAAACTTCCGATCATCGGCCACATGCACATGTTAGGTCCCCTTCTCCACCACTCCTTCGACCGCCTCTCCCAAAAATACGGACCAATATTTTCACTTAACTTTGGTTCCGTCCTCTGCGTTGTTGCATCCACTCCTCACTACGCAAAACAAATCCTTCAAATCAACGAACATGCCTTTAATTGTCGTAATGAATCAACTGCAATTAAACGCCTCACCTACGAAGCATCCCTAGCTTTTGCACCCTATGGCGAATATTGGAGATTTATTAAAAAACTTAGTATGAACGAA…		MEPLLLAFTLFLSSLICYIIFQPILNRQKNLPPSPLFKLPIIGHMHMLGPLLHHSFDRLSQKYGPIFSLNFGSVLCVVASTPHYAKQILQINEHAFNCRNESTAIKRLTYEASLAFAPYGEYWRFIKKLSMNELLGSRSISSFQHLRLQETHNLLKFFADKAKNYEAVNVTQELLKLSNNVISKMMLGEAEEARDVVRDVTEIFGEFNVSDFIWLFKKLDLQGFGKRIEDLFMRFDTLVERIITKREELRKNKGRKENKGEQGAEFRDFLDILLDCAEDQNSEIKVQRVHIKALIMDFFTAGTDTTSISTEWALVELMNNPSLLQKAREEIDNIVGKNRLVDESDGPNLPYIQAIIKETFRLHPPVPMVTRRCVTQCKIENYVIPENSLIFVNNWAMGR…
Medicago truncatula Mt4.0v1	Medtr7g028020.1	MtrCYP93B11	ATGGAACCTCTACTATTAGCCTTCACATTATTTCTTTCATCACTCATTTGCTACATAATTTTCCAGCCAATTTTAAACCGTCACAAAAACCTCCCTCCATCGCCTCTATTCAAACTTCCGATCATTGGCCACATGCACATGTTAGGTCCCCTTCTCCACCACTCCTTCGACCGCCTCTCCCAAAAATACGGACCAATATTTTCACTTAACTTTGGTTCCGTCCTCTGCGTTGTTGCATCCACTCCTCACTACGCAAAACAAATCCTTCAAATCAACGAACACGCCTTTAATTGTCGTAATGAATCAACTGCAATTAAACGCCTCACCTATGAAGCATCTCTAGCTTTTGCACCCTATGGCGAATATTGGAGATTTATTAAAAAACTTAGTATGAATGAG…		MEPLLLAFTLFLSSLICYIIFQPILNRHKNLPPSPLFKLPIIGHMHMLGPLLHHSFDRLSQKYGPIFSLNFGSVLCVVASTPHYAKQILQINEHAFNCRNESTAIKRLTYEASLAFAPYGEYWRFIKKLSMNELLGSRSISSFQHLRLQETHNLLKLFADKAKNYEAVNVTQELLKLSNNVISKMMLGEAEEARDVVRDVTEIFGEFNVSDFIWLFKKLDLQGFGKRIEDLFMRFDTLVERIISKREELRKNKGRKENKGEQGAEFRDFLDILLDCAEDQNSEIKVQRVHIKALIMDFFTAGTDTTSISTEWALVELMNNPSLLQKAREEIDNVVGKNRLVDESDGPNLPYIQAIIKETFRLHPPVPMVTRRCVTQCKIENYVIPENSLIFVNNWAMGR…
Phaseolus vulgaris v1.0	Phvul.011G068100.1	PvuCYP93B24	ATGATTTCTGAGTCCCTCTTGTCAGTTCTGATTTTCTTCCTCTCTGCTTACCTTTTCAAACTGTTGTTTGAGAGAAGAAGAAAGCCCACGGCCCACTTTAAGCCCCCTCCAAGCCCACCTGCACTACCCATAATAGGGCACCTCCATCTGCTTAAACCCCTCATCCATCAATCGTTCCGGGAACTTTGTCTCCGATATGGGCCTCTTCTATACCTTCGAATAGGTTCTGTGAAGTTCATAGTTACAAGCACCCCTTCACTCGCCAAAGAATTTCTCAAGAACAATGAGCTCACATACTCTTCTCGCAAAATGAACATGGCCATTGACATGGTTACCTACCACAACGCTACGTTCGCGTTTGCCCCGTACGACACTTACTGGAAGTTCATGAAAAAGCTG…		MISESLLSVLIFFLSAYLFKLLFERRRKPTAHFKPPPSPPALPIIGHLHLLKPLIHQSFRELCLRYGPLLYLRIGSVKFIVTSTPSLAKEFLKNNELTYSSRKMNMAIDMVTYHNATFAFAPYDTYWKFMKKLSTTDLLGSKSLMQFLPIRTKLVHEFVQTLFQKSKAKESVNLTESLLRLSNNVISEMMLSIRSSGSDSQAEQARELVREVTQIFGEFNVSDFVGFCKNLDLQGFKKRALDIHKRYDSLLEKIISDREELRRESKVEGCEEGEEKVKDFLDMLLDILEQKELEVEVTRNHVKSLILDYFTAATDTTAVSVEWAIAELFNNPKVLKKAQEEVDKVTGNKRLLCEADSSELPYIHAIIKETMRLHPPIPMIMRKGIKECVVNGNMIPKGS…
Cajanus cajan	C.cajan_21139	CcaCYP93B61	ATGGAGGCTCTCCTCTTTGTCTCTTTCCTTGTTTCAGCTGCAGTGTGCTACGTGTTCCTCCTCCGCGGCAAGCAGCAGAACCTGCCTCCCTCTCCGGCGCTGCGGCTGCCTCTGGTGGGGCACATGCACCTGCTAGGGCCCCTCCTGCACCAGTCGCTCCACCGGCTCTCTCTCCGGCACGGCCCGATCTTCTCCCTCCGCTTCGGCTCCGTCCCCTGCGTGGTGGCCTCCTCCCCGCACCTGGCGAAACAGCTCCTCCACACGAACGAGCTGGCCTTCATCCGCCGCATCGAGACCACCGCCGTGAAGCGCCTGACCTACGACTCCTCCCTGGCCTTCGCCCCCTACGGCGACTACTGGCGCTTCATCAAGAAACTCTCCATGAACCAGCTCCTCGGC…		MEALLFVSFLVSAAVCYVFLLRGKQQNLPPSPALRLPLVGHMHLLGPLLHQSLHRLSLRHGPIFSLRFGSVPCVVASSPHLAKQLLHTNELAFIRRIETTAVKRLTYDSSLAFAPYGDYWRFIKKLSMNQLLGSRSIASFQHLRHNETRRFLGLLAQRARAHESVNVTEELLKLTNNVISVMMLGEAEEARDVVRGVTQIFGEFNVSDFIWVFKKLDLQGFGKRIEDLFQKFDTLVERVISKREEMRKKGMGNDESQGQVRDFLDILLDCVQDENSEVKINRVHIKALIMSYQLKSSLITLCYSLIQDFFTAGTDTQAISTEWALVELIKNPLLLQKAREEIDNVVGKGKLVEESDCPNLPYLQAIVKETFRLHPPVPMVTRRCVTSCSIENYVIPENT…
Cajanus cajan	C.cajan_21420	CcaCYP93B62	ATGATTGTTCAGTCCCTCTTATTAGTTCTCATTGTCTTCTTTTCTATTTTCCTTGTCAAATTCTTTGACAGAAAAACCAAACCAAGAGCCCACTTGAAGTACCCTCCAAGCCCACCACCAGCAATACCCATAATTGGCCACCTTCATTTGCTTAAACCCCTAGTTCATCAAGCCTTCCGAGACCTCTCCCTCCAATATGGACCTCTTTTGTGCCTTCGACTTGGTTTTGTTAAATTTGTGGTCGTCAGCACTCCATCACTTGCGAAAGAGTTTCTCAAAACTAACGAGCTTATATACTCTTCACGTAAGATGAACATGGCCATCAACATGGTTACCTACCAAAACGCCACTTTTGCTTTTGCCCCTTACGACACTTACTGGAAATTCATGAAAAGGCTT…		MIVQSLLLVLIVFFSIFLVKFFDRKTKPRAHLKYPPSPPPAIPIIGHLHLLKPLVHQAFRDLSLQYGPLLCLRLGFVKFVVVSTPSLAKEFLKTNELIYSSRKMNMAINMVTYQNATFAFAPYDTYWKFMKRLSTTELLGNKTIGQFQPIRTRELHEFIQILFDKSKAQESVNLTEALLRLSNNIISQMMLGIKSSGTESQAEQARALVREVTQIFGEFNVSDFIGFLENFDVHGFKKRAMDIHRRYDALLEKIISDREELRRKSKVEGCEDGNDKVMDFLDILLDVAEQKDCEVELTRNHIKSLILDFFTAATDTTSISVEWTIAELLNNPKVLKKAQEEVETVIGKKRLVCEADGPNLPYINAIIKETMRLHPPIPIIMRKGIEDCVVNGNKIPKGS…
Aquilegia coerulea v1.1	Aquca_009_00226.1	AcoCYP93K4	ATGGCCAATTCAAATCAGTTTGATGATGATCATGAGATTGTTAAATATATCTTGTTGTTTCTTGTTGTGCGACTATTGTTGGCTTGTTACATGAATCGCAGATTGAAACCTCGGACGAAGCTCCCACCAAGTCCATTGAGGTTACCATTTCTTGGTCATCTATACCTTCTTGGTCCACTTCTTCACCAATCATTCCAATATCTCTCCAAAAAATATGGTCCACTTGTTCATCTACATCTGGGAACACTAGGCCCTGTCGTCTTAGCTTCATCTCCTTCAATGGCCAAGGAATTCCTTAAGACTCATGAACTCAATTTTGCGTCAAGGCCTCGGTTACTAGGTTCTGAGTACACAGGTGGTTCACCAGGTTTTACCTTCACACCTTATGGACCTTATTGG…		MANSNQFDDDHEIVKYILLFLVVRLLLACYMNRRLKPRTKLPPSPLRLPFLGHLYLLGPLLHQSFQYLSKKYGPLVHLHLGTLGPVVLASSPSMAKEFLKTHELNFASRPRLLGSEYTGGSPGFTFTPYGPYWKFVKKICVTELFSNKKLNYFSKIRCEEVQFFLVSLLEKSRLHEPVDMDVALTALTNNIICRMAMSTRCSSSTNEAEECRKIVEELILVAGKLNLVHILGVFGSFDLFGYGKRLGEVNERYMVMAERIMKTHEEKRRDHQAGGWNDQEDEDDLMDILLKISEDDKAEMKLSRHDIKAFLQDIFAAGTETSSVALQWALAELINNPHVFKKARDEIESVVGTSRLVQESDIPDLPYIQAIVKETLRLHPSAPVILRECNRDCTIAGYD…
Cicer arietinum v1.0	Ca_22645	CarCYP93E1	ATGACAATGGGAAAAAAGAGTAATGGGATGGGTGATGAAGTTGGGAAATTGAGAAAGTTAGTTAGGGAAATTGGTGAACTTCTTGGTGCATTTAATTTGGGTGATATAATTGAGTTTATGAGACCTTTAGATTTACAAGGATTTGGGAAGAGGAATAGAAATGCACATCATAACATGGATGAAATGATGGAGAAAGTGTTGAAGGAGCATGAAGAGGTTAGAGCAAAAGAGGGTGTTGATAGTGATAGGAAAAAGGATTTGTTTGATATTTTGTTGAACTTGATTGAAGCTGATAGTAAACTCACTAGAGAAAGTGCTAAAGCTTTTGCTCTGGACATGTTTATTGCAGGAACAAATGGACCAGCAAGTGTGTTAGAATGGGCACTAGCAGAGCTCATA…		MTMGKKSNGMGDEVGKLRKLVREIGELLGAFNLGDIIEFMRPLDLQGFGKRNRNAHHNMDEMMEKVLKEHEEVRAKEGVDSDRKKDLFDILLNLIEADSKLTRESAKAFALDMFIAGTNGPASVLEWALAELIRNPQVFKKAREEIDSVVGKERLVKESDIPNLPYLQAVVKETLRLHPPTPIFAREAIRSCQVDGYDIPEHSKIFINAWAIGRDPNYWDNPLVYDPERFLLSDDPSKSKIDVRGQYYQLLPFGSGRRSCPGASLALLVIQATLASLVQCYDWVVNDGKSNEIDMSEVGRVTVFLAKPLKCKPVPHFVPFSA*
Cajanus cajan	C.cajan_46649	CcaCYP93E1	ATGCTAGACATCCAAGGCTACCTTGTGCTGTTCTTGCTATGGTTCGTATCAATCATTTTGATCAAATCCATCTTAAAAAAATCGCAATGCTTGAGACTCCCCCCTGGCCCTCCAATTTCGTTTCCACTCGTTGGACACGCACCTTATCTCCGTTCTCTCCTTCACCAAGCACTCTACAAACTCTCCCTGCGCCATGGCCCTTTGATCCACGTGATGATCGGGTCCAAGCACGTGGTTGTGGCATCATCAGCGGAATCCGCGAAGCAGATCCTCAAAACCTCCGAAGAGGCCTTCTGCAATCGCCCGCTGATGATTGCGAGCGAGAGCCTCACGTACGGCGCCGCCGATTACTTTTTCATCCCGTACGGAACCTACTGGCGGTTTCTCAAGAAGCTCTGC…		MLDIQGYLVLFLLWFVSIILIKSILKKSQCLRLPPGPPISFPLVGHAPYLRSLLHQALYKLSLRHGPLIHVMIGSKHVVVASSAESAKQILKTSEEAFCNRPLMIASESLTYGAADYFFIPYGTYWRFLKKLCMTELLSGKTLEHFVSIRESEIEAFLRTILQISTAGKAVEMRPELIRHTNNIITRMIMGKKSNGGDDEVAQLRKVVREVGELLGAFNLGDVFGFMRPFDLQGFGKKNMDTHHRVDMMMEKVLKEHEEARAKEGKHSDRKKDLFDILLDLIEVEGTDNKLTRESAKAFALVCVFFFFFFF*
Glycine max Wm82.a2.v1	Glyma.08G350800.1	GmaCYP93E1	ATGCTAGACATCAAAGGCTACCTCGTACTCTTCTTCCTATGGTTCATATCAACCATTCTGATACGTTCCATCTTCAAGAAACCACAGCGTCTAAGACTCCCACCGGGTCCTCCAATTTCAATACCCTTGCTGGGACACGCGCCATATCTCCGTTCACTGCTCCACCAAGCATTGTACAAGCTATCACTGCGCTATGGACCCTTGATCCACGTCATGATCGGTTCGAAGCACGTGGTGGTGGCGTCGTCGGCGGAGACGGCCAAGCAGATCCTCAAAACCTCGGAGGAGGCATTCTGCAACCGTCCCTTAATGATAGCGAGCGAGAGCCTAACCTACGGCGCGGCGGACTACTTCTTCATCCCCTACGGCACATACTGGCGGTTCCTGAAGAAGCTCTGC…		MLDIKGYLVLFFLWFISTILIRSIFKKPQRLRLPPGPPISIPLLGHAPYLRSLLHQALYKLSLRYGPLIHVMIGSKHVVVASSAETAKQILKTSEEAFCNRPLMIASESLTYGAADYFFIPYGTYWRFLKKLCMTELLSGKTLEHFVRIRESEVEAFLKRMMEISGNGNYEVVMRKELITHTNNIITRMIMGKKSNAENDEVARLRKVVREVGELLGAFNLGDVIGFMRPLDLQGFGKKNMETHHKVDAMMEKVLREHEEARAKEDADSDRKKDLFDILLNLIEADGADNKLTRESAKAFALDMFIAGTNGPASVLEWSLAELVRNPHVFKKAREEIESVVGKERLVKESDIPNLPYLQAVLKETLRLHPPTPIFAREAMRTCQVEGYDIPENSTILIS…
Cajanus cajan	C.cajan_15743	CcaCYP93E2	ATGGTGTTAATTGGACAGGACATGTTCATAGCCGGCACAAACGGCCCCGCAAGCGTTCTGGAGTGGTCACTAGCGGAGCTGGTGAGGAACCCACACGTATTCAAGAAAGCAAGAGAAGAGATCGACGCAGTTGTGGGCAACACAAGGCTGGTGAAAGAATCAGACATTCCGAAGCTACCGTACCTGCAAGCAGTGGTGAAGGAAACCCTAAGGCTGCACCCACCCACCCCAATCTTCGCGAGGGAAGCCATGCGAGCGTGCCAAGTGGACGGCTACGACATTCCCGCCAACTCCACCATCATGATCAGCACGTGGGCCATAGGGAGAGACAAAAGCTACTGGGACAAGCCTCTCGAGTACAACCCCGAGAGGTTCTTGCTTGCTGACGACCCTGGCAAG…		MVLIGQDMFIAGTNGPASVLEWSLAELVRNPHVFKKAREEIDAVVGNTRLVKESDIPKLPYLQAVVKETLRLHPPTPIFAREAMRACQVDGYDIPANSTIMISTWAIGRDKSYWDKPLEYNPERFLLADDPGKARIDVRGQYYQLLPFGSGRRSCPGASLALLVMQATLASLVQCFDWVVNDGKSHEVDMTEEGRVTVFLANPLKCRPVPRFTPFAAAAAAST*
Medicago truncatula Mt4.0v1	Medtr7g056103.1	MtrCYP93E1	ATGCTTGAAATCCAAGGCTACGTAGTATTATTCCTATTATGGTTCATTTCAAGTATTTTCATTAGGTCACTTTTCAAGAAATCAGTGTGTTACAAATTACCACCTGGACCACCAATTTCATTTCCAATCTTAGGACATGCACCATATCTTAGATCACTTCTTCATAAATCACTTTACAAACTTTCAAATCGTTATGGACCTTTAATGCATATTATGCTAGGTTCACAACATGTAGTAGTTGCATCAACTGCTGAAAGTGCTAAACAAATTTTAAAGACTTGTGAAGAGTCATTTACCAATAGACCTATTATGATTGCAAGTGAGAATTTAACATATGGTGCTGCTGATTATTTTTTCATACCTTATGGAAATTATTGGAGGTTTCTTAAGAAGCTTTGT…		MLEIQGYVVLFLLWFISSIFIRSLFKKSVCYKLPPGPPISFPILGHAPYLRSLLHKSLYKLSNRYGPLMHIMLGSQHVVVASTAESAKQILKTCEESFTNRPIMIASENLTYGAADYFFIPYGNYWRFLKKLCMTELLSGKTLEHFVHIREDEIKCFMGTLLEISKNGKPIEMRHELIRHTNNIISRMTMGKKSSGMNDEVGQLRKVVREIGELLGAFNLGDIIGFMRPLDLQGFGKRNKDTHHKMDVMMEKVLKEHEEARAKEGAGSDRKKDLFDILLNLIEADDGAESKLTRQSAKAFALDMFIAGTNGPASVLEWALAELIRNPHVFKKAREEIDSTVGKERLFKESDIPNLPYLQAVVKETLRMHPPTPIFAREATRSCQVDGYDVPAFSKIFIN…
Phaseolus vulgaris v1.0	Phvul.008G128700.1	PvuCYP93E1	ATGCTAGACATCAAAGGTTACCTTGTTCTATTCTTCCTGTGGTTCATTTCCACAGTTTTTATTCGTTCAATCTTCAAAAGATCCCAGGGTATGAAACTCCCTCCTGGTCCTCCCATCTCAATACCCTTACTAGGGAACGCACCGTATCTCCGTGCGGTGCTTCACCAAGCACTGTACAAACTCTCCCTACGATATGGTCCCTTGATCCATATCACCATCGGCTCCAAAAACGTCGTTGTAGCTTCCTCCCCGGAGACAGCCAAACAGATCCTTAAAACCTCCGAAGAGGCCTTCTGCAACCGCCCCTTAATGATTGCGAGCGAGAGTTTAACCTACGGCGCCGCTGACTACTTCTTCATTCCGTACGGGACCTACTGGCGCTTCCTGAAGAAGCTCTGC…		MLDIKGYLVLFFLWFISTVFIRSIFKRSQGMKLPPGPPISIPLLGNAPYLRAVLHQALYKLSLRYGPLIHITIGSKNVVVASSPETAKQILKTSEEAFCNRPLMIASESLTYGAADYFFIPYGTYWRFLKKLCMTELLSGRTLEHFVGIRESEVEAFLKRMLEISETGKEVVMRQELITHTNNIITRMIMGKKSNDANDFVAQLRMLVREVAELLGAFNLGDIIGFARPLDLQGFGKKNMETHQKVDTMLEMVLKEHEKARAKAAADSDRKKDLFDILLNLIEADGTDNKLTRQSAKAFALDMFIAGTNGPASVLEWSLAELVRNPHVLKKAREEIDSVVGKERVVKESDIPNLPYLQAVVKETLRMHPPTPIFAREAMRTCQVDGYDIPAHSTILIST…
Lotus japonicus v2.5	LjSGA_008809.1	LjaCYP93E1	ATGCTCGACACACAAAGCTACCTTCTATTGTTCTTCCTATGGTTCATATCCACCATTTTAATCAGGTCCATCTTCAAGAAATCCCAATGTTATAAACTACCCCCTGGCCCACCAATTTCCTTGCCTCTCATAGGGCATGCTCCTTATCTCCGATCACTCCTTCACCAAGCACTCTACAACCTCTCCCACAAGTATGGGCCTTTGATGCATATCTTACTCGGTTCCAAGCATGTCATAGTTGTATCCTCGGCAGAAATGGCGAAGCAGATCCTCAAGACTTCTGAAGAGTCCTTCTGCAACCGCCCTATTATGATCGCAAGTGAGAATCTCACATATGGTGCTTCTGACTACTTCTTCATCCCTTACGGAACTTACTGGCGCTTCCTCAAGAAGCTCTGC…		MLDTQSYLLLFFLWFISTILIRSIFKKSQCYKLPPGPPISLPLIGHAPYLRSLLHQALYNLSHKYGPLMHILLGSKHVIVVSSAEMAKQILKTSEESFCNRPIMIASENLTYGASDYFFIPYGTYWRFLKKLCMTELLSGKTLEHFVSVRENEIQAFLKTILEISKTGEAVVMRQELIRHTNNVISMMTMGKKSEGSKDEIGELRKVIREIGELLGSFNLGDIIGFMRPLDLQGYGKKNKDMHRKLDGMMEKVLKEHEEARATEGADSDRKKDLFDILLNLIEADGADNKLTRDSAKAFALDMFLAGTNGPASVLEWSLAELIRNPHVLKKAREEIDTVVGKERLVKESDIPNLPYLQAVVKETLRMHPPTPIFAREAMRSCQVDGYDIPANSKIFISA…
Glycine max Wm82.a2.v1	Glyma.07G202300.1	GmaCYP93C5	ATGTTGCTGGAACTTGCACTTGGTTTGTTTGTGTTAGCTTTGTTTCTGCACTTGCGTCCCACACCAAGTGCAAAATCAAAAGCACTTCGCCACCTCCCAAACCCTCCAAGCCCAAAGCCTCGTCTTCCCTTCATTGGCCACCTTCACCTCTTAAAAGATAAACTTCTCCACTATGCACTCATCGATCTCTCCAAAAAGCATGGCCCCTTATTCTCTCTCTCCTTCGGCTCCATGCCAACCGTCGTTGCCTCCACCCCTGAGTTGTTCAAGCTCTTCCTCCAAACCCACGAGGCAACTTCCTTCAACACAAGGTTCCAAACCTCTGCCATAAGACGCCTCACTTACGACAACTCTGTGGCCATGGTTCCATTCGGACCTTACTGGAAGTTCGTGAGGAAG…		MLLELALGLFVLALFLHLRPTPSAKSKALRHLPNPPSPKPRLPFIGHLHLLKDKLLHYALIDLSKKHGPLFSLSFGSMPTVVASTPELFKLFLQTHEATSFNTRFQTSAIRRLTYDNSVAMVPFGPYWKFVRKLIMNDLLNATTVNKLRPLRTQQIRKFLRVMAQSAEAQKPLDVTEELLKWTNSTISMMMLGEAEEIRDIAREVLKIFGEYSLTDFIWPLKYLKVGKYEKRIDDILNKFDPVVERVIKKRREIVRRRKNGEVVEGEASGVFLDTLLEFAEDETMEIKITKEQIKGLVVDFFSAGTDSTAVATEWALAELINNPRVLQKAREEVYSVVGKDRLVDEVDTQNLPYIRAIVKETFRMHPPLPVVKRKCTEECEINGYVIPEGALVLFNVWQ…
Glycine max Wm82.a2.v1	Glyma.13G173500.1	GmaCYP93C1v2	ATGTTGCTTGAACTTGCACTTGGTTTATTGGTTTTGGCTCTGTTTCTGCACTTGCGTCCCACACCCACTGCAAAATCAAAAGCACTTCGCCATCTCCCAAACCCACCAAGCCCAAAGCCTCGTCTTCCCTTCATAGGACACCTTCATCTCTTAAAAGACAAACTTCTCCACTACGCACTCATCGACCTCTCCAAAAAACATGGTCCCTTATTCTCTCTCTACTTTGGCTCCATGCCAACCGTTGTTGCCTCCACACCAGAATTGTTCAAGCTCTTCCTCCAAACGCACGAGGCAACTTCCTTCAACACAAGGTTCCAAACCTCAGCCATAAGACGCCTCACCTATGATAGCTCAGTGGCCATGGTTCCCTTCGGACCTTACTGGAAGTTCGTGAGGAAG…		MLLELALGLLVLALFLHLRPTPTAKSKALRHLPNPPSPKPRLPFIGHLHLLKDKLLHYALIDLSKKHGPLFSLYFGSMPTVVASTPELFKLFLQTHEATSFNTRFQTSAIRRLTYDSSVAMVPFGPYWKFVRKLIMNDLLNATTVNKLRPLRTQQIRKFLRVMAQGAEAQKPLDLTEELLKWTNSTISMMMLGEAEEIRDIAREVLKIFGEYSLTDFIWPLKHLKVGKYEKRIDDILNKFDPVVERVIKKRREIVRRRKNGEVVEGEVSGVFLDTLLEFAEDETMEIKITKDHIKGLVVDFFSAGTDSTAVATEWALAELINNPKVLEKAREEVYSVVGKDRLVDEVDTQNLPYIRAIVKETFRMHPPLPVVKRKCTEECEINGYVIPEGALILFNVWQ…
Medicago truncatula Mt4.0v1	Medtr4g088160.1	MtrCYP93C27	ATGTTGGTGGAACTTGCAGTTACTCTATTGCTCATTGCTCTCTTCTTACACTTGCGTCCAACACCTACTGCAAAATCAAAGGCTCTTCGCCACCTTCCCAATCCTCCGAGTCCCAAACCTCGTCTTCCATCCATTGGTCATCTTCACCTTTTGGATAACCCTCTTCTTCACCACACTCTTATCAAGTTAGGAGAACGTTATGGCCCTTTGTACACTCTTTACTTTGGTTCCATGCCTACCATTGTTGCCTCAACCCCTGACTTGTTTAAACTTTTCCTTCAAACCCATGAAGCTACTTCCTTTAACACAAGGTTCCAAACCTCTGCTATTAGTCGTCTTACCTATGACAACTCTGTTGCTATGGTTCCATTTGGACCTTACTGGAAGTTTATTAGAAAG…		MLVELAVTLLLIALFLHLRPTPTAKSKALRHLPNPPSPKPRLPSIGHLHLLDNPLLHHTLIKLGERYGPLYTLYFGSMPTIVASTPDLFKLFLQTHEATSFNTRFQTSAISRLTYDNSVAMVPFGPYWKFIRKLIMNDLLNATTINKLRPLRSREIRKVLKVMANSAETQQPLNVTEELLKWTNSTISTMMLGEAEEVRDIARDVLEIFGEYSVTNFIWPLNKFKFGNYEKRIDEIFNKYDPIIEKVIKKRQEIVNKRKNGEIIEGEQSVVFLDTLLEYAQDETMDIKITKEQIKGLVVDFFSAGTDSTAVSTEWTLSELINNPRVLKKAREEIDSVVGKDGLVDESDVQNLPYIRAVVKEAFRMHPPLPVVKRKCTQECEIDGYVIPEGALILFNVWA…
Medicago truncatula Mt4.0v1	Medtr4g088170.1	MtrCYP93C19	ATGTTGGTGGAAATTGCAATTGCTTTATTGGTGATTGCTCTTTTTATACACTTACGTCCAACACCTACTGCAAAATCAAAGGCACTTCGCCATCTTCCAAATCCACCAAGCCCTAAACCACGTCTTCCTTTCATTGGTCATCTTCATCTTTTGGATAACCCACTTCTTCACCACACTCTTATCAAGTTAGGAAAGCGTTATGGACCTTTGTACACTCTTTACTTTGGTTCCATGCCTACCGTTGTTGCATCCACTCCTGACTTGTTTAAACTTTTCCTTCAAACCCATGAAGCTACTTCCTTTAACACAAGATTCCAAACCTCTGCTATTAGTCGTCTTACCTATGAAAAATCTGTTGCTATGGTTCCATTTGCACCTTATTGGAAGTTTATTAGAAAG…		MLVEIAIALLVIALFIHLRPTPTAKSKALRHLPNPPSPKPRLPFIGHLHLLDNPLLHHTLIKLGKRYGPLYTLYFGSMPTVVASTPDLFKLFLQTHEATSFNTRFQTSAISRLTYEKSVAMVPFAPYWKFIRKLIMNDLLNATTVNKLRPLRSREILKVLKVMANSAETQQPLDVTEELLKWTNSTISTMMLGEAEEVRDIARDVLKIFGEYSVTNFIWPLNKFKFGNYDKRTEEIFNKYDPIIEKVIKKRQEIVNKRKNGEIVEGEQNVVFLDTLLEFAQDETMEIKITKEQIKGLVVDFFSAGTDSTAVATEWTLAELINNPRVWKKAQEEIDSVVGKDRLVDESDVQNLPYIRAMVKEVFRLHPPLPVVKRKCTEECEINGYVIPEGALILFNVWQ…
Medicago truncatula Mt4.0v1	Medtr4g088195.1	MtrCYP93C20	ATGTTGGTGGAACTTGCAGTTACTCTATTGCTCATTGCTCTCTTCTTACACTTGCGTCCAACACCTACTGCAAAATCAAAGGCTCTTCGCCACCTTCCAAATCCACCAAGCCCTAAACCACGTCTTCCATTCATAGGTCATCTTCACCTTTTGGATAACCCACTTCTTCACCACACTCTTATCAAGTTAGGAAAGCGTTATGGCCCTTTGTACACTCTTTACTTTGGTTCCATGCCTACCGTTGTTGCATCCACTCCTGACTTGTTTAAACTTTTCCTTCAAACCCATGAAGCTACTTCCTTTAACACAAGATTCCAAACCTCTGCTATTAGTCGTCTTACCTATGATAATTCTGTTGCTATGGTTCCATTTGCACCTTATTGGAAGTTTATTAGAAAG…		MLVELAVTLLLIALFLHLRPTPTAKSKALRHLPNPPSPKPRLPFIGHLHLLDNPLLHHTLIKLGKRYGPLYTLYFGSMPTVVASTPDLFKLFLQTHEATSFNTRFQTSAISRLTYDNSVAMVPFAPYWKFIRKLIMNDLLNATTVNKLRPLRSREILKVLKVMANSAETQQPLDVTEELLKWTNSTISTMMLGEAEEVRDIARDVLKIFGEYSVTNFIWPLNKFKFGNYDKRTEEIFNKYDPIIEKVIKKRQEIVNKRKNGEIVDGEQNVVFLDTLLEFAQDETMEIKITKEQIKGLVVDFFSAGTDSTAVSTEWTLSELINNPRVLKKAREEIDSVVGKDRLVDESDVQNLPYIKAIVKEAFRLHPPLPVVKRKCTQECEIDGYVVPEGALILFNVWA…
Phaseolus vulgaris v1.0	Phvul.003G051700.1	PvuCYP93C25	ATGTTGCTCGAACTTGCAATTGGTTTGTTGGTGCTAGCTTTGTTTTTGCACCTGCGTCCCACACCCACTGCTAAATCAAAGGCCCTTCGCCACCTTCCAAACCCTCCTAGTCCAAAGCCTCGTCTTCCATTCATCGGTCACCTTCACCTTCTCAAGGACAAACTTCTCCACTATGCCCTCATAGATTTATCCAAACGCCATGGCCCTTTGTTCTCTCTCTACTTTGGCTCTATGCCAACCGTCGTTGCCTCCTCCCCTGAGTTGTTCAAACTCTTCCTTCAAACCCACGAGGCTGCTTCCTTCAACACCAGGTTCCAAACCTCTGCCATAAGGCGCCTCACTTATGACAACTCAGTGGCCATGGTTCCCTTTGGACCTTACTGGAAGTTCATCAGGAAG…		MLLELAIGLLVLALFLHLRPTPTAKSKALRHLPNPPSPKPRLPFIGHLHLLKDKLLHYALIDLSKRHGPLFSLYFGSMPTVVASSPELFKLFLQTHEAASFNTRFQTSAIRRLTYDNSVAMVPFGPYWKFIRKLIMNDLLNATTVNKLRPLRTQEIRKFLKVMAQSAKAQQPLNVTEELLKWTNSTISMMMLGEAEEIRDIARDVLTIFGEYSLTNFIWPLNKLKLGKYENRTEEIFNKFDPIIEKVIKKRREIVRRRKNGEVVAEEQSGVFLDTLLEFAEDETMEIKITDEQIKGLVVDFFSAGTDSTAVATEWALAELINNPRVLQKAREEVYSVVGKDRLVDEVDTQNLPYIRAIVKETFRMHPPLPVVKRKCVEECEIDGYVIPEGALILFNVWA…
Phaseolus vulgaris v1.0	Phvul.003G051800.1	PvuCYP93C28	ATGTTGCTGGAAATTGCAATCGGTTTGTTGTTGATAGGACTGTTTCTGCACCTGCGTCCTACACCCACTGCTAAATCCAAGGCCCTTCGACACCTTCCCAACCCTCCTAGCCCAAAGCCTCGGCTTCCCTTCATTGGACACCTTCACCTTTTGAATGGCCAACTTCTGCACCACTCTCTCATTACTCTTTCCCAACGTTATGGCCCTTTGTTCTCTCTCTACTTTGGCTCCATGCCCACCGTTGTTGCCTCCACCCCCGAGTTGTTCAAACTCTTCCTTCAAACCCACGAGGCTGCTTCCTTCAACACCAGGTTCCAAACCTCTGCTATTAAGCGCCTCACTTACGACAACTCCGTTGCCATGGTTCCTTTTGGACCTTACTGGAAGTTCATCAGGAAG…		MLLEIAIGLLLIGLFLHLRPTPTAKSKALRHLPNPPSPKPRLPFIGHLHLLNGQLLHHSLITLSQRYGPLFSLYFGSMPTVVASTPELFKLFLQTHEAASFNTRFQTSAIKRLTYDNSVAMVPFGPYWKFIRKLIMNDLLNATTVNKLRPLRSHEIRKVLRVFAQSAESQQPLNITEELLKWTNNTISMLILGEAEEVRDLARETVKIFGEYSLTNFIWPLNKLKFGKYEKRIDEIFNKFDPVIEKVSKKRQEIVRRRKNGEVVEGEQSGIFLDTLLEFAEDETMEIKITKEQIKGLVVDFFSAGTDSTAVATEWALAELINNPRVLQKAREEVYSVVGKDRVVDEVDTQNLPYIRAIVKETFRLHPPLPVVKRKCVEECEIEGCVIPEGALILFNVWA…
Phaseolus vulgaris v1.0	Phvul.003G074000.1	PvuCYP93C26	ATGATCATGTTGCTCGAAATTGCAATTGGTTTGTTGGTGCTAGCATTGTTTCTGCACCTGCGTCCTACACCCACTGCTAAATCCAAGGCCCTTCGCCACCTTCCCAACCCTCCTAGCCCAAAGCCCAGGCTTCCCTTCGTTGGTCACCTTCACCTTTTAAAAGACCAACTTCTCCACCACTCCCTCCTTTCTCTTTCCCAACGTTATGGTCCTTTGTTCTCTCTCTACTTTGGCTCTATGCCCACCGTTGTTGCCTCCACTCCTCAGTTGTTCAAACTCTTCCTTCAAACCCACGAGGCTGCTTCCTTCAACACCAGGTTCCAAACCTCTGCTATTAAGCGCCTCACTTACGACAACTCCGTTGCCATGGTTCCTTTTGGACCTTACTGGAAGTTCATC…		MIMLLEIAIGLLVLALFLHLRPTPTAKSKALRHLPNPPSPKPRLPFVGHLHLLKDQLLHHSLLSLSQRYGPLFSLYFGSMPTVVASTPQLFKLFLQTHEAASFNTRFQTSAIKRLTYDNSVAMVPFGPYWKFIRKLIMNDLLNATTVNKLRPLRSHEIRKVLRVLAQSAQAQQPLNVTEELLKWTNNTISMMMLGEAKEVRDLARETVKIFGEYSLTNFIWPLNKLKFGKYEQRIDEIFNKFDPVIEKVIKKRQEIVRRRKNGEVVEGEQSGIFLDTLLEFAEDETMEIKITKEQIKGLVVDFFSAGTDSTAVATEWALAELINNPRVLQKAREEVYSVVGKDRVVEEVDTQNLPYIRAIVKETFRLHPPLPVVKRKCVEECEIEGCVIPEGALILFNV…
Lotus japonicus v2.5	chr4.CM0432.2900.r2.m	LjaCYP93C17	ATGTTGGTGGAAATTGCATTAGCTTTATTGGCACTAGCCTTGTTCTTACAATTTCGTCCTACACCAACTGCAAAATCCAAAGCCCTTCGCCACCTTCCAAACCCTCCAAGTCCCAAGCCTCGTCTTCCATTCGTAGGACACCTTCACCTTTTGGACCAACCTCTCCTCCACAACTCCCTCATCAAACTTGGTGAGAAATATGGGCCTTTATACACTCTCTATTTTGGTTCTATGCCCACCGTCGTTGCCTCCACCCCTGAACTTTTCAAACTCTTCCTCCAGACACACGAGGCTACTTCCTTCAGCACAAGGTTCCAAACCTCCGCCATCCGCCGCCTCACCTACGACAACTCAGTCGCCATGGTACCTTTTGCTCCTTACTGGAAGTTCATCAGGAAG…		MLVEIALALLALALFLQFRPTPTAKSKALRHLPNPPSPKPRLPFVGHLHLLDQPLLHNSLIKLGEKYGPLYTLYFGSMPTVVASTPELFKLFLQTHEATSFSTRFQTSAIRRLTYDNSVAMVPFAPYWKFIRKVIMNDLLNATTVNKLRPLRSQEIRKVLKAMAQSAESQKPLNVTEELLKWTNSTISRMMLGEAEHVKDIVREVLKIFGEYSLTDFIWPLKKLRVGQYEKRIDEIFNKFDPVIEKVIKKRQEIIKRRKERNGELEEGEQSVVFLDTLLEYAADENMEIKITKEQIKGLVVDFFSAGTDSTAVATDWALAELINNPRVLKKAREEVDSVVGKDRLVDESDIQNLPYIRAIVKETFRMHPPLPVVKRKCVQECELNGYVIPEGALVLFNV…
Lotus japonicus v2.5	chr4.CM0432.3150.r2.m	LjaCYP93C29P	ATGTTGGTGGAAATTGCATTAGCTTTATTGGCACTAGCCTTGTTCTTACAATTTCGTCCTACACCAACTGCAAAATCCAAAGCCCTTCGCCACCTTCCAAACCCTCCAAGTCCCAAGCCTCGTCTTCCATTCGTTGGACACCTTCACCTTTTGGACCAACCTCTTCTCCACCACTCCCTCATCAAACTCGGTGAGAAATATGGGCCTTTGTACTCTCTCTATTTTGGTTCCATGCCCACTGTCGTTGCTTCCACTCCTGAACTCTTCAAACTCTTCCTTCAGACCCATGAGGCCTCTTCCTTCAACACAAGGTTCCAAACCTCTGCCATTAGGCGCCTCACCTATGACAACTCTGTTGCCATGGTCCCTTTTGCTCCTTATTGGAAGTTCATCAGGAAG…		MLVEIALALLALALFLQFRPTPTAKSKALRHLPNPPSPKPRLPFVGHLHLLDQPLLHHSLIKLGEKYGPLYSLYFGSMPTVVASTPELFKLFLQTHEASSFNTRFQTSAIRRLTYDNSVAMVPFAPYWKFIRKIIMNDLLNATTVNKLRPLRSQEIRKVLKAMAQSAKSQQPLNATEELLKWTNSTISRMMLGEAEQVRDLAREVLEIFGEYSLTDFIWPLKKFKVGQYEKRIDEIFNKFDPVIEKVIKKRQEIIKRRKERNGELEEGEQSVVFLDTLLEFAEDESMEIKITKEQIKGLVVDFFSAGTDSTAVATDWALSELINNPRVLKKAREEVDSVVGKDRLVDESDIQNLPYIRAIVKETFRMHPPLPVVKRKCAQECELNGYVIPEGALVLFNV…
Lotus japonicus v2.5	chr4.CM0432.3190.r2.m	LjaCYP93C30	ATGTTGGTGGAACTTGCATTAGCATTACTGGCCATAGCTCTGTTCTTACATTTACGTCCCACACCAACTGCCAAATCCAAGGCCCTTCGTCACCTTCCAAACCCTCCAAGTCCCAAGCCTCGTCTTCCATTCGTTGGACACCTTCACCTTTTGGACCAACCACTTCTCCACCACTCCCTCATCAAACTCGGCGAGCGATATGGGCCTTTGTACTCTCTCTATTTTGGATCCATGCCCACCGTTGTTGCCTCAACCCCTGAACTCTTCAAACTCTTCCTTCAGACCCATGAGGCCTCTTCCTTCAACACAAGGTTCCAAACCTCTGCCATTAGGCGCCTCACCTATGACAACTCTGTTGCCATGGTCCCTTTTGCTCCTTATTGGAAGTTCATCAGGAAG…		MLVELALALLAIALFLHLRPTPTAKSKALRHLPNPPSPKPRLPFVGHLHLLDQPLLHHSLIKLGERYGPLYSLYFGSMPTVVASTPELFKLFLQTHEASSFNTRFQTSAIRRLTYDNSVAMVPFAPYWKFIRKIIMNDLLNATTVNKLRPLRSQEIRKVLKAMAHSAESQQPLNVTEELLKWTNNTISRMMLGEAEEVRDIAREVLKIFGEYSLTDFIWPLKKLKVGQYEKRIDEIFNKFDPVIEKVIKKRQEIIKRRKERDGELEEGEQSVVFLDTLLEFAEDETMEIKITKEQIKGLVVDFFSAGTDSTAVATDWALSELINNPRVLKKAREEVESVVGKDRLVDEADIQNLPYIRAIVKETFRMHPPLPVVKRKCVQECELNGYVIPEGALILFNV…
Cicer arietinum v1.0	Ca_06357	CarCYP93C3	ATGTTGGTGGAAATTGCAGTTACTTTAGTGCTAATTGCTCTATTCATACACTTCCGACCAACACCAACAGCTAAATCAAAAGCTCTTCGACACCTTCCCAATCCACCAAGTCCCAAACCTCGTCTTCCTTTTGTTGGTCATCTTCACCTTTTAGATCACCCTCTTCTTCACCAATCTCTCATTCGTTTAGGAGAACGTTATGGCCCTTTATACTCTCTTTATTTTGGTTCCATGCCTACTATTGTTGCCTCCACCCCTGACTTGTTTAAACTCTTTCTTCAAACACATGAAGCTGTTTCCTTCAACACAAGGTTTCAAACCTCTGCCATAAGACGTTTGACTTATGACAACTCTGTTGCTATGGTTCCTTTTGCACCTTACTGGAAATTTATTAGGAAG…		MLVEIAVTLVLIALFIHFRPTPTAKSKALRHLPNPPSPKPRLPFVGHLHLLDHPLLHQSLIRLGERYGPLYSLYFGSMPTIVASTPDLFKLFLQTHEAVSFNTRFQTSAIRRLTYDNSVAMVPFAPYWKFIRKLIMNDLLNATTVNKLRPLRSQEIRKVLNVMAKSAQTQEPLNVTEELLKWTNSTISRMMLGEAEEIRDIARDVLKIFGEYSLTDFIWPLKKLKVGKYEKKIEEIFNRFDPVIEKVIKKRQDVRRRRKERNGELEEGEQSVVFLDTLLDFAEDETMEIKITKEQIKGLVVDFFSAGTDSTAVATDWCLSELINNPRVMKKAREEVDSVVGKDRLVDESDIQNLPYIRAVVKETFRMHPPLPVVKRKCTEECEINGYVIPEGALVLFNV…
Cicer arietinum v1.0	Ca_06358	CarCYP93C31	ATGTTGGTGGAACTTGCAATCACTTTATTGCTTATTGCTCTGTTTTTACACTTGCGACCAACACCAACAGCTAAATCAAAAGCTCTTCGACACCTTCCCAATCCACCAAGTCCCAAACCTCGTCTTCCTTTTGTTGGTCACCTTTACCTTCTGGATAACCCTCTTCTTCACTACTCTCTCATTCGTCTGGGAGAACGTTACGGGCCTTTGTATTCTCTCTACTTTGGTTCCATGCCTACTGTTGTTGCCTCCACCCCTGAACTATTCAAACTCTTCCTTCAAACACATGAAGTTGTTTCCTTCAACACAAGGTTCCAAACCTCTGCCATTAGACGACTCACTTATGATAACTCTGTTGCTATGGTTCCCTTTGGACCTTACTGGAAGTTTATTAGGAAA…		MLVELAITLLLIALFLHLRPTPTAKSKALRHLPNPPSPKPRLPFVGHLYLLDNPLLHYSLIRLGERYGPLYSLYFGSMPTVVASTPELFKLFLQTHEVVSFNTRFQTSAIRRLTYDNSVAMVPFGPYWKFIRKLIMNDLLNATTINKLRPLRSQEIHEVINVMAHSAKTQEPLNVTEELLKWTNSTISRMMLGEAEEIRDIARDVLKIFGEYSLTDFIWPLKKLKVGKYEKRIDEIFNKYDPIIEKVIKKRQEIRKKRKERNGELEEGEESVVFLDTLLQYAEDETMEIKITKEQIKGLVVDFFSAGTDSTAVATDWCLSELINNPRVMKKAREEVDSVVGKDRLIDESDIQNLPYIRAIVKETFRMHPPLPVVKRKCTQECEINGYVIPEGALILFNV…
Cajanus cajan	C.cajan_47755	CcaCYP93C32	GATTTCTTCTCTGCGGGGACAGATTCCACAGCTGTGGCAACAGATTGGGCTCTGGCAGAGCTTATCAACAACCCTAGAGTGTTGCAAAAGGCCCGAGAGGAGGTGGAGAGTGTTGTGGGAAAAGATAGACTTGTTGATGAAGCTGATATTCAAAACCTTCCTTACATCAGAGCCGTTGTGAAGGAGACATTCCGCATGCATCCACCACTCCCTGTGGTCAAAAGAAAATGCACAGAAGAGTGTGAGATCAACGGCTATGTGATCCCAGAAGGAGCTTTGATACTATTCAATGTTTGGGCTGTAGGAAGAGACCCCAAATATTGGGACAGACCAGCGGAATTTCGCCCTGAAAGATTTTTAGAAAATGGTGGTGAAGGTGATGTAGGACCTATTGATCTT…		DFFSAGTDSTAVATDWALAELINNPRVLQKAREEVESVVGKDRLVDEADIQNLPYIRAVVKETFRMHPPLPVVKRKCTEECEINGYVIPEGALILFNVWAVGRDPKYWDRPAEFRPERFLENGGEGDVGPIDLRGQHFQLLPFGSGRRMCPGVNLATSGMATFLASVIQCFDLQVVGPNGQILKGNDAKVSMEERPGLTVPREHHLLCVPHARTSVAAKLLSS*
Elaeis guineensis EG5	XP_010928984.1	EguCYP93A127	ATGGGCGGAGTAGAAGACCTCAAATCTTATGCCATCCTCTCCTCCTTCATATGTATTCTCTCCATCTACATCATCCGCGCCCTCTTCTTCAACTCCCGCACCCGTTTCCGCCTTCCACCAAGCCCGTTCGCCCTGCCTATCATCGGCCACCTCTACCTACTTACCCCCATCCCTCACCAAGCCCTCTACAAGCTCTCCCTACGCTACGGCCCCCTGATCCACCTCCGACTAGGCTCGGTCCCATGCGTCGTGGCCTGCTCGGCCGAGACAGCCAAAGGGTTCCTCAGGACTCATGATCTCGCCTTCTCTGACCGTCCTCAATCCAAGGCCGTCAGCTACCTCACCTACGGCTCCGCTGACTTCTCCTTCGCCCCCTACGGCCCTTACTGGAAGTTCATG…		MGGVEDLKSYAILSSFICILSIYIIRALFFNSRTRFRLPPSPFALPIIGHLYLLTPIPHQALYKLSLRYGPLIHLRLGSVPCVVACSAETAKGFLRTHDLAFSDRPQSKAVSYLTYGSADFSFAPYGPYWKFMKKLCMSELLGGRTLEQLLPIRREEILRLLQAVNKNSKERKAVDMGLELIKLTNNVISRMTMSRRCSGSDGEAEEARKLVEETAELTGKFNLADYIGFCKNLDLQGFDRRLEDLHRRFDGMMERIMKEKEEARKEAKEMGNAKDLLDILLDISEDETAQVKLSRENIKAFILDIFAAGTDTSAITIEWALAELINHPTILQKAGEEIDAVVGKNRLVEESDIPNLPYLQAIVKETLRLHPTGPMIVRESTQDCMINGYNIPANTRLF…
Elaeis guineensis EG5	XP_010910531.1	EguCYP93J1	ATGGAAGGAAGCACCCTCGCCTCCTCCACCCTATCCTTCTTGATCTCCCTCGCTTTGGTCCTCCTCATCAAAACCATCTTCTTCAAGGCCAAGCATCCCACGCCACACCTCCCGCCCGGCCCAACGCCCATCCCCATCATCGGCCACCTCCACCTCCTCCGCCCTCCACTCCACCAGTCTTTCCACAAGCTGACGAGCCGCTACGGCCCTCTCATCCACCTCCTCCTCGGCTCCACCCCCGCCATCGTGGCCTCGTCGCCCGACACCGTGCGGGAGCTCCTCAAGACCCACGACCTCGCTTTCGCCAACCGCCCCCAGTACACGGCCGTCCGCCGCTTCGCCTACGACTCCGCTGGCTTCGCCTTCGCCCCCTACGGCCCCTACTGGAGGTTCATGAAG…		MEGSTLASSTLSFLISLALVLLIKTIFFKAKHPTPHLPPGPTPIPIIGHLHLLRPPLHQSFHKLTSRYGPLIHLLLGSTPAIVASSPDTVRELLKTHDLAFANRPQYTAVRRFAYDSAGFAFAPYGPYWRFMKRLCMSELLGGRTIDQLSPLRRTELHALLRTLLDKSTAGNPVDLSWELIKLTNNVITRMTASSTTSVTEEARKLVKQVAELVGVFNLSDYIGIFRNLDLQGLNKRINTVHERFDAFMERIIKEKEEIRKRRKESGEGDAGVRDLLDIMLDVSEDENAEMKLTRENIKGFVLDIFTAGSDSSAATVEWALAELINHPHMLRKLREEIDKVVGKDRVVQECDIPNLPYLQAVVKETLRLHPAAPLATRVSDKEVKVGGYKIPANTSLFV…
Elaeis guineensis EG5	XP_010943586.1	EguCYP93G14	ATGGAACAATTAAGCTTCACCTCCCCAGCCTTCTTCCTCCTCCTCGCCATCTCCTTTGCATCCGTCCTTTTCGTTGCCACCCTCTCCAAGAACCGGTCCAGTCGCCGCCGCCGCCGCCTCCCGCCGGGGCCCCCGGCAATCCCGATCATCGGCCACCTGCACCTCCTCCGGCACCCGGTCCACCAGACCCTGTACCGCCTCGCCACCCGCCACGGCCCCCTCTTCAGCCTCCGCCTCGGCTCCACCCACTGCGTCATCGCCTCCTCCCCTGACCTCGCCCGCGAGCTCTTCAAGAGCCACGACACGGCCATCTCCAACCGCCCCCAGACCGCCGCTGCCCGCCACTTTGCCTACGACGCCTCCGGCTTCGCCTTCGCCCCCTACGGTCCCTACTGGCGC…		MEQLSFTSPAFFLLLAISFASVLFVATLSKNRSSRRRRRLPPGPPAIPIIGHLHLLRHPVHQTLYRLATRHGPLFSLRLGSTHCVIASSPDLARELFKSHDTAISNRPQTAAARHFAYDASGFAFAPYGPYWRFVKRLCMSELLGPRTVELLRPVRRVELLDLLRAALAKSACREPVDMSSEIIKMTNNEVTRMAASTTSSGAGGETEEARELVKQVAELVGAFNVADYIGFCKNLDLQGLEKRVREVHRRFDALMERIIRGKEEKRRRRKEMGCGGEDEVKDLLDILLDVAENDDAEMKLTRENIKGFILDIFTAGSDSSAATIEWGLAELINHPEVLEKVREEIDRVVGKDRVVEETDLPNLPYLQAVMKETMRLHPAAPVAHRQTTKAIHVGGYDI…
Solanum tuberosum SolTub_3.0	XP_006366258.2	StuCYP93A42	ATGGTAGATATTCAAGGCTACTTGATATTATTCCTTATTTGGCTATTTTCTACCTTATTTCTTAAATATGTTGTGTTTCGTAAACGGAATATATGTCACCTTCCACCAAGTCCATTTGGTTTACCAATCATCGGTCACTTACACCTCCTATCTCCTATTCCTCACCAAGCACTTCATAGGCTTTCAACTCGTTATGGGCCTTTGATTCATATAAATCTTGGATCCGTCCCTTGTCTAGTAGTTTCATCACCCGAAATGGCTAAAGAAGTACTCAAAACACATGAAACTTCCTTTCTAAATCGACCGCAAACATCAGTGGTTGATTACTTAACTTATGGTTCACAAGACTTCTCCTTTGCGCCTTACGGTGTTTACTGGAAGTTCATGAAGAAATTATGC…		MVDIQGYLILFLIWLFSTLFLKYVVFRKRNICHLPPSPFGLPIIGHLHLLSPIPHQALHRLSTRYGPLIHINLGSVPCLVVSSPEMAKEVLKTHETSFLNRPQTSVVDYLTYGSQDFSFAPYGVYWKFMKKLCMSELLGARTLDMLLPLRRDEIKRFIELLLQKAESSEEVDVEAELLRVSNNVISRMLMNERCSEDKDEAGSVRMLVQDIAELTGKFNLSDYIWFCKNLDLQGFGKRTKDVRKRFDEMMERIMNEHEEARRKRNGENKDGDESVVVKDLLDMLLDISEDECAEMRLTRENIKAFILDIFAAGTDTAAITVEWALAELINHPSIMQNAVQEIDFVIGKSRIVEESDILNLPYLQAIVKETLRLHPTGPMILRESTEDCCIGGYHIPKNT…
Beta vulgaris	AF195816.1	BvuCYP93C11	CTGCACTTGCGTCCCACACCCACTGCAAAATCAAAAGCACTTCGCCATCTCCCAAACCCACCAAGCCCAAAGCCTCGTCTTCCCTTCATAGGACACCTTCATCTCTTAAAAGACAAACTTCTCCACTACGCACTCATCGACCTCTCCAAAAAACATGGTCCCTTATTCTCTCACTACTTTGGCTCCATGCCAACCGTTGTTGCCTCCACACCAGAATTGTTCAAGCTCTTCCTCCAAACGAACGAGGCAACTTCCTTCAACACAAGGTTCCAAACCTCAGCCATAAGACGCCTCACCTATGATAGCTCAGTGGCCATGGTTCCCTTCGGACCTTACTGGAAGTTCGTGAGGAAGCTCATCATGAACGACCTTCTCAACGCCACCACTGTAAACAAGTTG…		LHLRPTPTAKSKALRHLPNPPSPKPRLPFIGHLHLLKDKLLHYALIDLSKKHGPLFSHYFGSMPTVVASTPELFKLFLQTNEATSFNTRFQTSAIRRLTYDSSVAMVPFGPYWKFVRKLIMNDLLNATTVNKLRPLRTQQIRKFLRAMAQGAEARKPLDLTEELLKWANSTISMMMLGEAEEIRDIAREVLKIFGEYSLTDFIWPLKHLKVGKYEKRIDDILNKFDPVVERVIKKRREIVRRRKNGEVVEGEVSGVFLDTLLEFAEDETMEIKITKDHTKGLVVDFFSAGTDSTAVATEWALAELINNPKVLEKAREEVYSVVGKDRLVDEVDTQNLPYIRAIVKETFRMHPPLPVVKRKCTEECEINGYVIPEGALIPFNVWQVGRDPKYWDRPSEFR…
Beta vulgaris	AF195817.1	BvuCYP93C33	TTTCTGCACTTGCGTCCCACACCCACTGCAAAATCAAAAGCACTTCGCCATCTCCCAAACCCACCAAGCCCAAAGCCTCGTCTTCCCTTCATAGGACACCTTCATCTCTTAAAAGACAAACTTCTCCACTACGCACTCATCGACCTCTCCAAAAAACATGGTCCCTTATTCTCTCTCTACTTTGGCTCCATGCCAACCGTTGTTGCCTCCACACCAGAATTGTTCAAGCTCTTCCTCCAAACGCACGAGGCAACTTCCTTCAACACAAGGTTCCAAACCTCAGCCATAAGACGCCTCACCTATGATAGCTCAGTGGCCATGGTTCCCTTCGGACCTTACTGGAAGTTCGTGAGGAAGCTCATCATGAACGACCTTCTCAACGCCACCACTGTAAACAAG…		FLHLRPTPTAKSKALRHLPNPPSPKPRLPFIGHLHLLKDKLLHYALIDLSKKHGPLFSLYFGSMPTVVASTPELFKLFLQTHEATSFNTRFQTSAIRRLTYDSSVAMVPFGPYWKFVRKLIMNDLLNATTVNKLRPLRTQQIRKFLRVMAQGAEAQKPLDLTEELLKWTNSTISMMMLGEAEEIRDIAREVLKIFGEYSLTDFIWPLKHLKVGKYEKRIDDILNKFDPVVERVIKKRREIVRRRKNGEDVEGEVSGVFLDTLLEFAEDETMEIKITKDHIKGLVVDFFSAGTDSTAVATEWALAELINNPKVLEKAREEVYSVVGKDRLVDEVDTQNLPYIRAIVKETFRMHPPLPVVKRKCIEECEINGYVIPEGALILFNVWQVGRDPKYWDRPSEF…
