# Supplementary material
Source: publisher figshare collection journal article supplement (https://plos.figshare.com/articles/dataset/_/4045491)
Supplement: Supplementary file 1 [file 1 › S3 Fig.PDF]

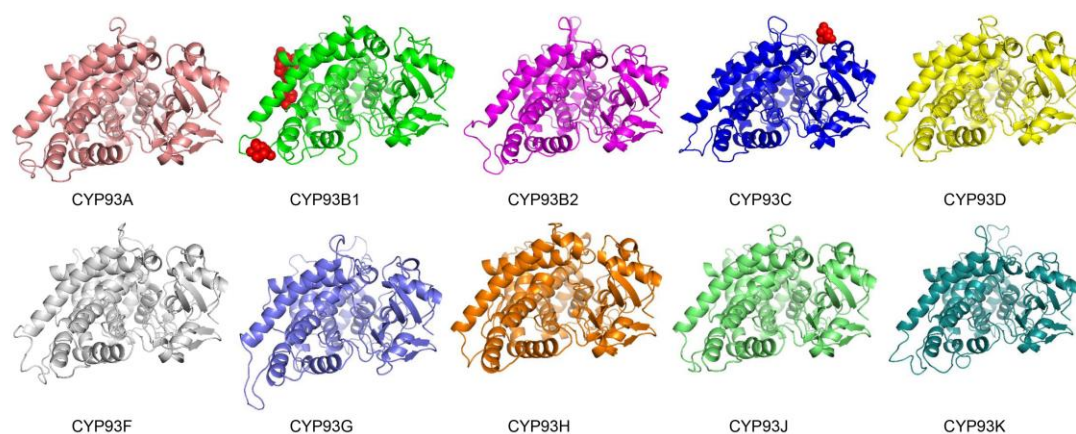

**S3 Fig: Modeled structure of CYP93 of each group.** The overall structures of CYP93 are very similar. Red spheres represent conserved insertion of B1 and C. The model was built using SWISS-MODEL (<http://swissmodel.expasy.org/>) and viewed using PyMOL software.
