# Supplementary material
Source: publisher figshare collection journal article supplement (https://plos.figshare.com/articles/dataset/_/4045491)
Supplement: Supplementary file 1 [file 1 › S3 Table.XLSX]

## Sheet: Sheet1
S3 Table . Primers of used in this study by qRT-PCR analysis.
Gene	Forward primer sequence (5'-3' )	Reverse primer sequence (5'-3')
AtCYP93D1	AAGCACTTCACAAGCTCTCAATC	GGCTGAGCCATAAGTAAGGTAGTC
GmaCYP93A24	TGGATCAACTACTACCCGTTAGGC	CCATTCTCATCACTATGCTGTTTGTT
GmaCYP93A26	CATTGATGTTGGGAGAGAACTACTG	CCTAAGGAACCAAATGAAGTCCG
GmaCYP93A3	TTCACAAGCTCTCACTCCGCT	AATAGGGTCCGTAGGGTGCG
GmaCYP93A1	CACCAAGATTTTTACAAGCTCTCAAC	GGAAGTCTTGGGAATCGTAGGCT
GmaCYP93A19	GCCACCTCCATCTCATCTCCG	CGTGCGTTTTCAGGAACTCCT
GmaCYP93A30	GGAACTGAGACATCAGCCACT	CTGATTCCTCAACCAATCTATTC
GmaCYP93A2	GTGGCGGATGTCGCAGAA	ATTCTGTCCAAGACAGCGTCG
GmaCYP93A41	CACCAAGATTTTTACAAGCTCTCACT	AAGTCCTGGGAATCGTAGGCA
GmaCYP93B16	ACACTTCCTACCTATTCGGACGAG	CCTGCTCTGCCTGGCTGTCT
GmaCYP93B19	GAAGAAAGCTCAAGAGGAGGTAGAG	CAGTCTTCGATTCCTTTCCTCG
GmaCYP93E1	GCAAGCGTCCTAGAGTGGTCAC	GTTTCCTTCAGCACTGCTTGTAGG
GmaCYP93C2	CAGTGTTGTGGGCAAAGATAGACTC-	TCCCCTTCAGCACCAGTTTCTAA
GmaCYP93C1	AACCTTCCTTACATTAGAGCAATC	GCTCCCTCTGGGATCACATAT
OsaCYP93G1	TTGGGAATGGGCACTACGA	CCGATCACCGGTAGGCTC
OsaCYP93G2	GCGGTGCTCAAGGAGACGTT	AAGATGTTGAAGAAGACCTGGGTGT
OsaCYP93F1	GGGCGCTGTCAGAGCTAATC	CTCGGGATGTCCGACTCGT
ZmaCYP93F6	TGCTGCAGTGCTTCGAGTGG	GTTTCTTCCACGCCGTTATTAGC
ZmaCYP93G7	CTTTCATCATCGACGTGGTGACT	GGTACGGCAGCTGTGGCAG
ZmaCYP93G5	TCTTCAACATCTTCTCCATCGGC	GCATGAGCTGCATGTGCTGC
ZmaCYP93G11	CCACGACCACGATGCCACC	CACCTCGGACACGCACAGC
ZmaCYP93G10P	GCATGGGCCTGGCGCTG	GAAGGGGGTCAGGCGAGGT
ZmaCYP93G6	CCTGATGGCGGTATACAAGGAGAC	TCCGATGGCCCACACGTG
ZmaActin	GCATCCATGAGACCACCTACAACTC	CGGTGATCTCCTTGCTCATACGG
GmaUBQ	GACCCTTACGGGTAAGACTATTAC	GTCCTTCCATCCTCTAGCTGT
AtActin	ATCTCTATGGAAACATCGTTCTCAG	ATCCTCCGATCCAGACACTGTA
OsActin	GACCCAGATCATGTTTGAGACCT	CAGTGTGGCTGACACCATCAC
