# Supplementary material
Source: publisher figshare collection journal article supplement (https://plos.figshare.com/articles/dataset/_/4045491)
Supplement: Supplementary file 1 [file 1 › S4 Fig.PDF]

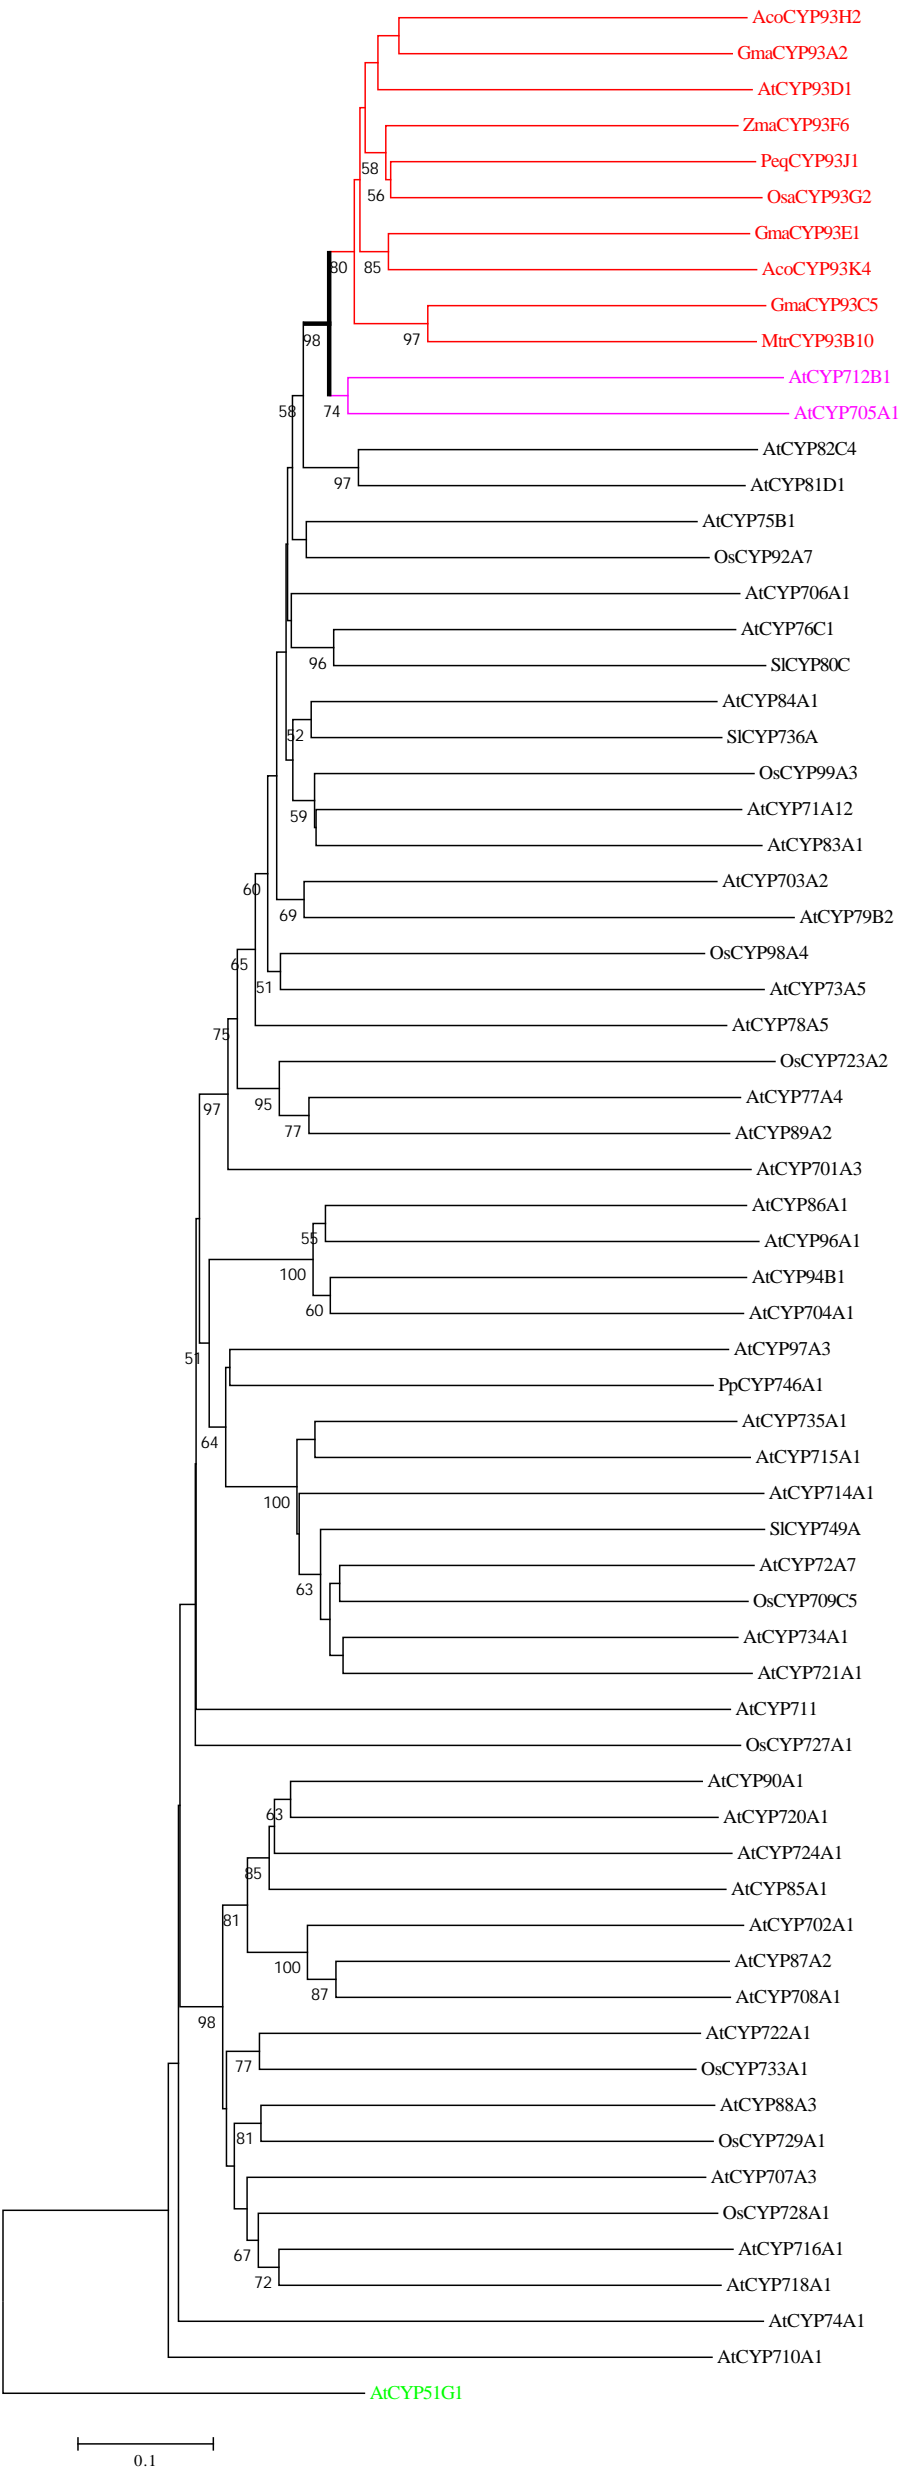

**S4 Fig. Phylogenetic tree of CYP93 proteins and representative of each family of the plant P450 superfamily.** The neighbor-joining (NJ) tree includes the the representatives of the 10 CYP93 subfamilies and 57 representatives of other plant P450 families. Bootstrap values of <50 are not shown. CYP51 is the root of the tree.
