# Supplementary material
Source: publisher figshare collection journal article supplement (https://plos.figshare.com/articles/dataset/_/4045491)
Supplement: Supplementary file 1 [file 1 › S4 Table.XLSX]

## Sheet: Table S2
S4 Table. The identity and similarity analysis of plant CYP93 proteins.
	BraCYP93D1	BnaCYP93D1_A	BolCYP93D1	BnaCYP93D1_C	BolCYP93D2P	AlyCYP93D1	AtCYP93D1	BstCYP93D1	CgrCYP93D1	CruCYP93D3	CruCYP93D1	EsaCYP93D1	PeqCYP93J1	EguCYP93J1	MacCYP93A92	EguCYP93A92	AcoCYP93A95	AcoCYP93A98	AcoCYP93A96	AcoCYP93A97	SlyCYP93A42	StuCYP93A42	CanCYP93A42	AchCYP93A101	VviCYP93A16	PmuCYP93A90	PpeCYP93A90	PmuCYP93A102	PpeCYP93A103	PpeCYP93A104	MdoCYP93A105	FveCYP93A106	MesCYP93A118	PtrCYP93A4	GraCYP93A87	TcaCYP93A87	CsiCYP93A124	CsiCYP93A67	CclCYP93A67	CsiCYP93A69	CclCYP93A70	CclCYP93A69	CsiCYP93A125	CsiCYP93A68	CclCYP93A68	CclCYP93A66	CpaCYP93A13	GmaCYP93A26	PvuCYP93A56
BraCYP93D1		80.2	60	77.8	64	85.4	84	83.4	83.8	83.8	83.8	85.3	42.1	37.5	40.4	48.4	51.5	50.6	44.7	48.8	49.4	49.5	49.3	50.9	48.2	53.2	52.5	51.7	51.3	45.8	52.6	53.7	54.1	54.1	53	53.6	44.6	46.4	44.3	39.5	49.5	51.8	50.3	49.6	50	49	52.9	50	42
BnaCYP93D1_A	80.6		73.8	96.1	79.2	69.4	68.2	66.5	67.2	67.3	67.2	69.1	34.2	29.2	35.9	39.2	42.5	41.7	38.9	40.3	38.9	39.6	39.4	41.6	40.6	42.8	42.6	41.6	42.2	36.9	42.2	42.9	43.8	43	41.8	43.2	38	43.2	40.7	29	39.5	41.5	39.9	39.8	40.2	38.7	42.8	40.2	42.2
BolCYP93D1	61.2	75.5		76.7	84.9	54.1	53.3	51.4	51.5	51.6	51.7	54.4	26.9	20	30.6	30.6	32	32	29.9	30.8	30.1	30.3	29.5	33.8	31.4	32.9	32.6	32.2	32.6	28.8	32.1	32.7	34	32.9	32.4	33.1	28.9	33.4	31.4	17.5	30.9	32.4	31.5	30.8	31	29.6	32.7	31.4	35.7
BnaCYP93D1_C	79.4	98	76.7		78.9	69.8	69.4	67.5	67.8	67.9	67.8	70.3	34.1	29	35.7	38.5	42.1	41.3	38.7	40.3	39.1	39.6	39.4	42.9	40	42.6	42.4	42.1	42.2	36.9	42.4	43.3	44.3	43	42.8	43.9	38	43.2	40.7	29.2	39.7	41.8	40.3	40	40.4	39	42.4	40.4	42.2
BolCYP93D2P	66.5	82.1	88.7	82.1		58.1	56.9	55.2	55.5	55.6	55.5	58.2	28.8	23.9	33.9	34.8	35.3	35.5	32.7	33.9	33.9	33.9	33.7	35.9	36.3	36.3	36.1	35.2	35.7	33.3	35.9	36	37.8	36.2	34.4	36.2	33.8	37.3	35	22.5	33.8	35.5	34.4	34	34.2	33.1	36.7	34.9	39.3
AlyCYP93D1	93.9	76.8	58.6	76.4	63.8		92.9	89.7	90.5	90.7	90.7	90.7	41.7	37.3	39.7	49.1	50.6	49.5	45.9	48.8	50	49.3	49	50.3	46.2	52.2	51.1	51.5	49.8	45.7	51.8	52.3	53.4	52.8	51.8	52	43.2	45.7	43	40.9	49.9	52.4	51.2	48.3	48.7	48.8	52.1	50.2	42.1
AtCYP93D1	93.9	76.6	58.6	76.8	63.6	96.6		88.3	89.5	89.9	89.3	89.9	41.9	37.1	40.8	49.2	50.5	49.8	45.5	48.9	50.1	50.3	49.9	51.4	46	53.2	52.1	52.1	50.9	46.9	52.4	53.1	53.4	53.4	53	52.8	43.8	46.4	44.1	40.2	49.9	52.4	50.9	48.7	49.2	48.6	52.5	49.8	42
BstCYP93D1	92.9	75.3	57.5	75.5	62.8	93.7	92.7		89.9	89.3	89.9	87.9	41.7	36.7	39.7	48.5	49.1	48.7	44.5	48.7	49.1	48.4	48.6	49.6	45.3	52.6	51.7	51.1	49.2	44.7	51.1	51.5	52.5	51.7	51.1	51.3	41.4	44.8	41.8	39.8	48.9	51.1	50.6	48.2	48.6	47.6	51.4	48.3	41.3
CgrCYP93D1	92.9	76.4	58.3	76.4	63.7	94.5	94.3	94.3		98.6	97.8	88.3	41.8	37.2	40.6	49.6	50.3	49.9	45.9	48.6	51.3	50.3	50.3	51.2	47	53.9	52.8	52.2	50.5	46.3	52.6	53.4	53.8	53.4	51.8	52.6	43.4	46	43.5	40.2	49.9	52.4	50.7	48.6	49.2	48.5	53.7	49.9	41.9
CruCYP93D3	93.3	76.4	58.7	76.6	64.1	94.9	94.9	94.1	99		97.2	87.9	41.3	37.3	40.4	49.2	50.1	49.7	45.9	48.4	51	50	49.9	51.1	46.9	53.5	52.4	52.2	50.6	46.4	52.4	53.4	53.6	53.2	51.8	52.8	43.3	45.8	43.3	40	49.7	52.2	50.7	48.6	49.2	48.4	53.7	49.9	41.9
CruCYP93D1	93.1	76.2	58.4	76.4	63.6	94.7	93.9	94.5	98.6	98.2		88.1	41.8	37.5	39.8	49.8	50.4	50	45.8	48.4	50.4	49.6	49.4	50.4	46.9	53.1	52	51.8	50.1	45.8	52	52.8	53.5	52.7	51.5	52.3	43.2	45.7	43	40.1	49.8	52.1	50.2	48.2	48.7	48.4	53.4	49.6	42
EsaCYP93D1	92.9	76.2	58.9	76.4	64.1	94.7	94.3	93.1	93.3	93.5	93.3		42.5	38.7	40.4	49.5	51.1	49.8	45.3	48.7	51.4	50.7	50.7	51.8	46.8	53.3	52.5	51.9	51.5	46.5	53	53.5	53.9	54.1	53.5	53.8	45.6	46.8	44.3	40.3	50.1	52.6	51.2	50	50.4	50	54.2	50.3	42.3
PeqCYP93J1	64.2	51.4	39.3	51.2	43.3	65	65	65.2	64	63.8	64.4	65.2		46.6	40.8	49.8	48.8	48.1	42.4	48	46.5	47.9	46.6	48.2	42	50.8	50.5	49.8	48.5	44.4	49.2	48.4	47.6	48.7	45.9	48.9	40.5	43	40.8	38.7	49	49.2	48.6	47.2	47.6	43.6	48.4	47.6	41
EguCYP93J1	56	52	36	51.7	43	54.5	54.7	54.3	55.7	55.3	55.8	55.2	58.5		35.3	46.1	44.7	44.2	39.3	42.4	41.9	41.9	42.8	43.3	47	44.8	44.6	44.8	43.2	43.2	45	44.1	44.4	44.5	42.9	45.1	37.3	37.5	34.9	52.1	43.1	43.3	43.1	40.5	40.9	40.5	43.2	41	31.1
MacCYP93A92	58.4	55.7	47.1	55	50.3	59	59.6	59.1	59.9	59.5	59.6	59.7	57.3	55.5		57.2	50.3	47.5	44.9	48.3	49.1	50	49.2	50.8	47.1	51.7	51	51	48.4	48	50.2	51.2	51.8	50.8	50.2	51.1	45.4	42.7	40.2	37.9	49.5	50	49.6	46.8	47.6	46.4	49.7	48.2	43.8
EguCYP93A92	70.3	56.4	42.8	56	48.1	71.9	71.7	71.1	70.9	70.7	70.9	71.7	70.7	59.7	69		67.1	62.6	54.7	60.1	62.3	62.7	62.8	65.5	57.2	67.3	66.5	66.9	62.9	56.7	66	66.1	67.2	67	65	66.1	53.5	57.8	55.2	51	65.8	67.6	65.2	63.4	64	63.2	67.2	61.5	52.2
AcoCYP93A95	73.7	60.2	45.3	59.8	50.1	74.1	73.9	72.9	72.9	72.7	72.9	74.5	70	59.2	65.9	81.7		74.2	66.6	73	64.4	65.1	62.4	67.4	58.8	67.3	66.9	66.5	64.2	58	68.1	67.1	69.8	69.8	64.7	68.7	54.9	57.8	55.2	48.5	64.9	65.4	65.2	63.1	63.7	61.2	65.6	63.4	53.4
AcoCYP93A98	71.9	58.3	45.7	58.3	49.6	72.6	72.4	71.5	72	71.9	72	72	70.1	59.4	62.8	79.8	88.4		64	73.4	60.9	60.1	58	64	56.6	63.6	62.8	62.5	60.8	53.1	64.4	63.8	64.4	63.7	62.4	64.1	49.5	53.3	50.9	44.7	58.7	59.5	59.3	55.1	55.7	58.3	62.1	59.9	49.7
AcoCYP93A96	66.5	57.2	43.2	57	48.7	68.3	68.1	67	68.5	68.1	68.2	67.9	65.6	56.6	63.7	72.1	82	80.1		71.6	54.7	53.6	53.6	55.8	48.8	57.6	57.3	57.4	54.1	48.2	57.9	55.8	57.9	57.9	55.6	59	48.3	49.3	46.5	39.6	53.2	54.4	53.8	52.3	52.9	52.8	56.6	54.1	45.2
AcoCYP93A97	72.4	58.3	44.8	58.1	48.9	72.2	73	72	71.6	71.4	71.8	72.2	70.5	57.1	64.8	77.7	87.1	86.5	84		57.9	57.3	57.1	61.3	51.9	61.8	61.3	61.4	58.6	51.5	63.2	61.7	62.5	59.9	58.7	62.6	49.5	53.1	50.7	42.1	57.2	57.8	58.3	56	56.6	57.8	59.3	58.4	47.9
SlyCYP93A42	70.7	56.4	42.1	56.4	47.1	71	71	71.2	70.7	70.8	70.7	72.6	68.1	56.2	63.3	77.6	81.5	78.4	73.6	77.4		90.9	85.9	68.8	55.5	68.5	68.2	67.9	63.9	56.3	68.6	68.9	68.2	68.5	65.3	67.8	52.7	57.9	55.4	48.7	62.7	64.6	63.3	63.3	63.9	62.1	66.2	66	54.4
StuCYP93A42	71.2	56.3	42	56.1	46.8	70.4	71.2	70.2	70.6	70.8	70.6	71.4	67.6	55.7	62.4	77.1	80.5	77.7	72.3	76.1	96		86.6	69.5	56.1	69.5	69.5	69	64.9	57.5	69.5	70.3	67.6	68.3	65.1	67.6	51.9	57.4	54.8	49.6	63.4	65.5	63.9	62	62.6	61.8	65.8	65.8	54.6
CanCYP93A42	70.8	56.9	42.5	56.5	48.1	71.5	71.5	71.2	71.2	71	70.8	72.5	66.9	56.7	62.3	78.1	79.6	76.9	71.9	76.3	93.7	93.5		70.2	55.8	69.7	69.5	68.7	64	57.2	69.5	68.6	67.9	67.1	64.8	67.1	52.9	57.8	55	49.6	62.8	65.1	63.5	61.4	62	61.5	64.6	66.3	53.2
AchCYP93A101	71.5	57.8	44.8	58.5	48.8	72.1	73.3	73.3	72.9	72.5	72.5	73.1	67.8	57.6	62.8	82.2	84.1	80.4	74	81.6	84.4	84.4	85.4		60	75.3	76.1	74.1	69.7	63.7	75.5	75.5	71.4	72	69.6	73.1	55.9	59.8	57.5	50.7	66	68.3	66	63.9	64.5	64.2	69.1	68.5	55.7
VviCYP93A16	62.8	61.1	46.2	61.1	52.6	63.2	62.6	62.6	63.7	63.1	63.2	63.1	59.3	66.8	64.5	69.4	69.7	67.3	64.1	65.8	67.6	67.9	67.7	70.3		60.4	59.7	59.3	56.3	53.2	61	60.2	59.3	62.2	57.7	60.5	53.1	50.2	47.3	53.7	57.3	59.5	57.3	53.5	54.3	54	60.6	56.2	48.4
PmuCYP93A90	71.7	57.7	44.5	57.7	48.7	72	72.6	73.2	72	71.5	72.2	72.8	70.7	58.3	63.7	81.2	82.7	81	73.8	79.8	82.6	82.6	83.7	87.4	70.5		98.1	96.7	83.9	76.7	88.8	84.1	76.4	75.4	71.5	76.5	58.7	65.2	62.7	55.2	72.3	74.1	72.7	69.1	69.9	67.1	72.5	71.7	59.5
PpeCYP93A90	71.3	57.4	44	57.2	48.4	71.1	72.1	72.5	71.5	70.9	71.7	72.1	70.2	58.5	63.2	80.6	82.2	80.4	73.4	79.3	82.6	82.8	83.8	87.4	70.5	99.4		95.9	83.5	76.7	88.6	83.1	76.2	75.6	71.5	75.6	58.5	65.2	62.7	55	72.3	74.1	72.7	69.2	70	66.8	71.8	70.8	58.8
PmuCYP93A102	70.8	57	44.4	57.6	48.2	71.4	72	72.2	71.4	71	71.8	71.8	70.4	58.6	63.8	80.4	82.3	79.8	73.2	79	81.5	81.5	82.7	86	69.5	98.1	97.5		82.8	75.8	87.2	82.3	74.8	74	70.6	74.7	58.1	63.7	61.2	54.1	71.2	72.7	72.3	67.8	68.5	66.6	70.8	70.1	58.8
PpeCYP93A103	71.7	57.5	43.7	56.9	47.8	71	71.7	70.4	70.8	70.4	70.6	71.9	70.2	59.1	62.8	80.9	80.9	79.7	72.5	77.8	80.5	80.5	81.2	85.3	68.6	92.6	92.2	91.2		82.7	79.7	77.1	71.9	70.5	67.2	70.9	56.1	62	59.8	50.4	66.7	68.7	67.5	65.5	66.1	63.9	67.5	65.8	54.7
PpeCYP93A104	65.7	56.3	42	56.1	47.6	66.1	66.3	65.6	66.3	65.7	66.6	66.1	64.4	61.9	65.6	72.7	74.1	72	68.4	70.1	72.2	72.3	72.9	76.2	69.7	83.7	83.3	82.5	86.2		72.8	70.7	65.5	64.3	60.2	64	55.1	55.8	53.7	50.2	60.5	61.7	60.9	58.8	59.6	57.9	60.9	59.3	49.1
MdoCYP93A105	72.3	58.1	44.4	57.9	48.9	72.5	72.9	73.3	71.9	71.7	72.7	73.5	70.2	59.6	64.1	81.5	84	81.5	75	80.5	83	82.1	83.5	87.2	71.5	95.7	95.3	94.4	91.2	82.3		85.2	75.2	76.7	71.3	77.1	57.7	63.9	61.5	54.9	70.8	72.6	70.8	67.3	68.1	66.9	71.6	72	59.7
FveCYP93A106	73.3	58.9	44.7	58.7	49	73.3	73.9	73.7	72.9	72.7	73.1	74.1	68.8	59.5	63.8	81.1	83	80.5	73.7	78.5	82.2	81.7	82.7	86.6	71.3	90.3	89.7	89.3	87.7	80.4	92		75.3	75	72.3	75.7	56.4	63.8	61.3	55.6	70.7	72.9	70	66.8	67.4	66	73.3	69.8	58.3
MesCYP93A118	72.3	57.7	43.9	57.5	49.3	73.5	73.7	73.3	73.5	73.5	73.1	73.7	68.8	59.6	66.3	82.7	83.2	80.9	74.5	80.3	82.6	81.7	82.1	87.8	70.6	87.6	87.4	86.6	86	77	87.9	85.2		77.8	71.7	76.6	58.7	65.6	63.2	54.5	71.5	73	71.1	69.3	69.6	67.8	72.9	69.6	58.6
PtrCYP93A4	73	58.9	44	58.1	49.7	73.6	74	72.6	72.6	72.4	72.8	73.8	67.7	59.9	65.9	84.7	86.1	82.8	75.1	80.8	84.7	84.5	84	88	72.2	88.3	87.8	87.5	86.2	77.9	88.9	87.7	90.1		72.8	77	59.8	65.1	63.6	55.2	73	74.6	72.6	69.5	70	69.2	74	70.5	59.5
GraCYP93A87	74.1	60.1	45	60.1	50.6	73.7	74.3	73.7	73.6	73.4	73.4	75.4	70.8	60.3	66.3	82.5	83	80.7	75.2	79.5	81.9	81.3	82.3	84.9	71.8	84.7	84.3	84	84.2	76.2	85.6	86.2	87.5	87.1		82.6	57.9	62.4	60.1	52.1	68.8	69.6	68.6	65.8	66.2	66.7	69.8	67.2	55.1
TcaCYP93A87	72.8	58.9	44.4	58.7	49.5	72.4	72.8	73	72	71.8	72	73.4	70.3	60.3	65.4	84.1	84.9	81.2	75.1	81	82.8	83.2	83.3	88.2	72.4	88.2	87.6	86.8	86.7	77.3	89.3	87.1	89.5	90.2	91.8		58.3	65.4	63.1	53.8	71	72.2	70.2	68.2	69	68.5	74.2	72	58.8
CsiCYP93A124	62.2	60	43.8	60	51.5	61.2	62.4	61.5	61.3	60.9	62	62.9	59.5	58.5	65.4	66.6	68.5	64.4	62.9	64.6	66.8	65.8	66.2	68	72.1	69.3	69	69.1	67.8	68.8	68.8	68	71.3	72	71.6	71.8		72.4	75.7	51.9	65.6	67.7	65.8	60.9	61.1	66.6	58.3	54.5	47.8
CsiCYP93A67	68.1	61.8	46.2	61.3	51.9	66.5	67.7	68.2	68.1	67.5	68.4	68.7	65.2	55	61.3	74.5	76	72	68.4	71.8	76.4	75	75.4	77.7	65.4	79.2	78.9	77.8	77.4	72.6	79.1	79.1	80.9	81.4	80.8	82	78.5		94.3	54.9	74.2	76	73.5	68.2	68.8	68.2	65	60.5	53.8
CclCYP93A67	65.3	61.2	45.4	60.8	51	63.4	65.1	64.6	64.7	64.1	65	66.1	62.1	54.2	59.7	71.3	72.9	68.9	65.3	68.5	72.6	71.6	72.1	74.6	64.7	76.1	75.8	74.7	73.9	72.8	75.8	75.7	77.8	77.9	77.6	79.1	82	95.3		54.3	71.4	73.2	70.6	65.8	66.1	69.8	62.9	57.7	51.6
CsiCYP93A69	56	52	36.4	51	42.8	56.6	57	56.3	57.1	56.3	57	56.9	52.6	69.6	55.7	62.3	62	58.5	55.6	56.4	61.6	60.9	62.1	62.4	68.2	64.1	63.8	63.8	62.4	64.3	64.5	64.4	64.1	65.8	64.5	64.4	67	64.8	66.4		69	71.2	68.4	57.2	58	50.8	54.8	49.2	39.3
CclCYP93A70	71.9	57.9	43.3	57.5	48.5	71.7	72.7	71.7	71.7	71.3	72.1	72.5	69.2	58.7	64.3	82.5	81.3	78	72.1	76.6	81.9	80.9	82.3	84.5	68.4	86.6	86.2	86	84.2	75.8	86.2	85	86.9	88.5	85.4	86.9	73.5	83.2	79.7	70.8		94.9	92.4	76	76.8	70.2	70.8	65.4	56.1
CclCYP93A69	72.7	58.7	44.1	58.5	49.3	72.9	73.7	72.7	72.7	72.1	73.1	73.5	69.6	58.9	64.3	83.4	81.9	78	72.7	77	83.2	82.3	83.8	85.7	69.6	88	87.6	87.4	85.4	76.4	87.3	86.4	87.9	89.7	86	88.3	74.9	84.8	81.3	71.7	97.5		91.4	77.2	78	71.4	72.7	67	57.5
CsiCYP93A125	72.7	59.1	44.1	58.7	49.5	73.1	74.1	72.9	73.5	72.9	73.1	73.9	70	59.1	63.9	82.3	80.7	79.1	72.5	76.6	81.1	80.2	81.7	84.3	69.2	86.6	86	86.6	84.4	75.4	86	84.4	86.2	87.5	85.2	85.8	74.1	83.2	79.7	70.6	96.5	95.7		75.6	76.4	70	69.8	65.3	55.9
CsiCYP93A68	70.3	57.1	42.1	56.9	47.2	70.5	71.6	71	70.6	70.1	70.3	72.6	67.1	56.6	63	80.4	80.6	77.5	72	76.7	81.1	79.4	79.2	82.6	67.3	82.1	82.8	81.5	81.3	73	83.2	82	85.2	85.5	83.8	85.5	70.6	80.4	77.1	64.8	86.7	87.3	86.7		99	68.9	66.3	62.7	54.7
CclCYP93A68	70.5	57.3	42.1	57.1	47.2	70.6	72	71.4	71	70.5	70.6	72.8	67.5	56.8	63.4	80.6	80.8	77.7	72	76.9	81.3	79.6	79.6	82.8	67.7	82.5	83.1	81.9	81.5	73.4	83.6	82.2	85.2	85.7	83.8	85.9	70.6	80.6	77.3	65.2	87.1	87.7	87.1	99.4		69.6	66.9	63.2	55.1
CclCYP93A66	71.1	57	42.2	56.6	47.4	71.1	71.7	70.8	71.5	71.3	71.4	72	66.2	56.6	62.2	77.6	78	76.6	71.7	74.4	77.4	76.7	76.7	79.5	66.9	80.6	80.2	80.2	78.9	73.1	80.7	79.8	83	83.4	81.7	83.6	73.9	80.9	80.3	62	82.3	82.8	82.1	81.6	82.2		66	63.9	54.5
CpaCYP93A13	71.7	57.9	44.5	57.9	48.7	72	72	72.8	72.6	72.4	72.8	74.4	67.8	58.1	63.5	83.5	81.9	80.4	73.8	79.8	81.3	79.6	81	83.7	70.1	85.8	85.1	84.7	83.7	74.6	85.4	84.9	85.4	87	85	88.2	69.1	78.4	75.3	63.1	85	85.6	84.7	82.3	82.5	81		69.4	57.4
GmaCYP93A26	71.9	57.9	44.6	58.1	49.4	72.1	72.3	71.9	71.5	71.3	71.3	72.7	68.4	57.4	63.2	78.5	79.8	78.5	71.9	76.4	80.9	80	81.3	84.3	69.2	86.2	86.2	84.9	84.1	75.2	85.7	83.5	86.2	85.7	82.8	86.4	67.2	76.7	73.1	62	83.7	84.5	82.8	80.6	80.8	78.5	83.7		70.6
PvuCYP93A56	60.4	63.4	51.4	64.8	56.7	62.2	62.4	62.3	62.3	61.9	62.2	62.3	59.5	53.7	65.7	66.6	68.9	66.1	63.3	64.6	67	66.6	66.9	69.2	68.8	71.3	71.1	71.4	70	69.5	71.2	70.2	72.3	71.8	70	71.6	67.4	67.1	67	56.7	70.4	70.8	69.8	67.9	68.1	67.5	69.5	77.1
CcaCYP93A110	71	58	45	58.2	49.7	71.2	71.8	71.4	71	70.6	70.8	72.4	69	57	63.9	79.2	82.4	79.1	74	77.5	78.8	78.8	78.5	83.3	70	84.1	83.5	83.1	83	75.7	83.6	83.2	85.2	84	82.6	85.3	68.8	75.3	72.2	60.9	81.9	82.7	81.1	79.6	79.8	77.5	82.5	91.1	76.7
LjaCYP93A107	71	56.5	43.9	56.9	48.7	71.2	71.2	71.5	71	71	71	71.7	68.4	58.5	64.3	81.1	81.9	78.9	73.5	78.4	81.3	80.7	80.4	86.8	68.8	85.6	86	84.4	84.8	76.6	86.2	84	86.7	86.2	84	87.5	67.8	76.4	73.3	61.4	83.4	84.4	82.1	81.1	81.5	78	83.3	91.9	76.8
MtrCYP93A8	71	56.9	43.8	56.8	48.7	71.2	71.4	71.2	71.4	71	71.2	71.2	67.1	57.9	63.6	80	80.6	79.5	73	77.5	79.9	79.4	80	84.3	68.7	84.9	84.7	84	83	74.4	84.4	84	85	85.5	83.8	86.9	67.7	75.9	72.8	62.4	83.4	84.2	82.7	80.2	80.2	77.7	84.7	90.1	74.2
CarCYP93A114	71.5	56.6	43.2	56.4	47.9	71.3	71.5	71.9	70.7	70.9	70.7	72.5	67.6	58.2	64.4	80.2	80.6	80.2	72.9	77.9	80.9	80.5	81	84.1	69	84.9	84.9	84.2	84.2	75.2	84.6	84.3	84.4	85.5	84.9	85.9	69	76.6	73.7	63.3	83.4	84.2	82.7	79.8	80	78.2	82.7	89.9	74.7
EgrCYP93A122	69.1	57.1	42.7	57.1	47.9	69.3	69.7	69.6	70.3	69.5	70.2	69.8	65.2	58.7	62	77	79.6	75.6	71	74.8	76.8	76.9	77.1	81.8	69.7	80.2	80.2	79.4	79.3	74.7	80.1	81.2	81.7	82.2	80.6	82	67.6	75.1	74.7	64.9	78.9	79.3	78.2	78.7	78.7	78.5	78.6	78.1	68.7
GmaCYP93A3	70.9	57.4	45	57.6	50.3	71.9	72.5	70.9	71.3	71.3	71.3	72.7	66.8	57.6	62.8	79.8	80.6	76.6	71.3	75.7	77.2	76	76.7	80.2	67.1	79.6	79.7	79.8	79.5	72.9	80.5	80.4	82.5	83	83.2	82.4	66.3	73.5	70.3	59	80.1	80.3	80.3	79.1	79.3	76.2	79.6	83.3	69.9
CcaCYP93A112	65.3	56.1	44.3	55.7	49.2	65.3	65.9	66	66.1	65.7	66.2	66.7	61.3	57.4	67.5	74.3	74.9	71.7	67.3	70.5	71.8	70.8	71.5	74	67.5	72.6	72.3	72.4	72.5	73.5	72.7	72.5	74.5	76.5	75.6	75.9	68.6	70.1	70	58.5	75	74.3	75	73.6	73.8	71.5	73.6	75.8	69.5
PvuCYP93A58	71.9	58.3	44.4	58	50.1	71.7	71.9	71.1	71.5	70.9	71.5	72.5	67.2	57.6	62.9	78.6	79.4	75.6	71.1	75.7	76.1	75.8	76.2	79.3	65.6	78.6	78.9	78.4	78.6	71.3	78.9	78.2	81.1	81.4	79.4	81.6	65.6	72.1	69	58.3	79.3	79.1	79.1	78.5	78.7	76	78.8	82.8	68.2
GmaCYP93A1	74	60.2	46.2	59.8	51.9	74.2	74	73.8	73.6	73.6	73.8	75	69.4	58.4	63.9	79.8	79.5	76.2	70.2	76.7	76.8	76.3	76.7	79.5	68	80.6	80.2	80	79.7	72.2	80.3	79.5	82.3	83.4	82.6	83	67.1	74	70.4	58.6	80.5	80.7	80.3	78.7	78.9	77.1	80.2	83.3	71
GmaCYP93A41	72.8	60.2	46.5	59.8	51.9	73.4	73.8	72.6	74	73.8	74	74.2	68.6	58.2	63.9	78.6	78.9	76	70.6	76.1	76.1	75.8	76.3	78.5	67.9	78.6	78.1	78.6	78.2	70.4	78.9	78.3	81.1	81.8	81.7	82.4	66.5	73.2	69.6	58	79.5	79.3	79.3	78.7	78.9	75.3	78.8	82.4	69.4
GmaCYP93A2	71.3	59	45.8	58.4	50.6	71.3	71.7	70.2	71.1	70.7	71.3	72.2	68	58.2	62.7	78	79.8	75.4	73.1	75.3	76.3	75.2	75.4	78.3	66.3	78.4	77.7	78.6	77.4	71.5	78.6	78.9	79.5	81	80.4	81.4	66.3	73.1	69.7	58.4	79.5	79.5	79.1	78.9	79.1	76.9	77.7	81.6	70.7
MesCYP93A120	75.3	61.5	46.3	61.3	51.2	75.3	76.5	74.3	75.3	75.3	75.1	76.5	65.6	57	61.9	79.2	79.8	78.8	70.6	76.3	78.8	78.6	79.4	82.4	67.9	81.4	80.6	80.2	80.5	72	81.7	79.4	83.7	82.9	81.5	82.7	67.5	74.5	71.4	59.9	80.2	81.1	80.4	79.4	79.4	77.2	80.8	79.7	66.5
PtrCYP93A6	73.9	60.6	46.2	60.6	51.3	74.9	75.6	74.9	74.5	74.3	74.5	76	64.7	58.1	61.8	78.4	79.1	78.8	70	75.8	78.8	78.4	79.4	82.6	67.8	81.6	81	80.4	80.5	72.5	81.5	81.3	83.8	82.8	81.1	83.4	67.3	75	71.7	59.8	80.3	81.5	80.3	79.1	79.1	78	80.6	80.4	68
CsiCYP93A65	64.6	60.8	43.2	60.1	49.9	64	64.8	64	65.3	65.1	65.2	65.3	54.3	70.1	60.8	65.8	66.9	64.2	59.4	61.1	63.1	63	63.5	67.1	74.6	66.2	65.3	65.6	64.9	67.5	66.5	66	68.8	68.7	66.3	68.3	66.7	63.6	63	71.7	65.5	66.3	65.5	64.8	65.2	64.7	66.6	66.9	64.1
CclCYP93A65	74.4	60.8	46.4	60.2	51.8	74	75	74.2	74.2	74.2	74.2	75.5	64.7	57.3	62.9	79	79.8	77.5	70.7	75.7	77	76.7	76.7	82.8	66.6	81.9	81	80.8	80	72	81.4	79	83.9	82.3	79.2	83.5	68.5	75.9	72.6	58.6	80.2	81.2	79.8	78.8	79.2	78.3	81.4	80.6	68.7
GraCYP93A88	69.8	56.9	41.7	55.9	47.4	70	70	69.2	69	68.8	69	69.8	63	55.9	60	76	76.2	74.9	67.8	72.9	75.1	74.2	76	78.1	64.5	78.4	77.7	78.4	77.8	69.6	78.4	77.2	79.3	78.6	77	78.4	64.5	71.9	68.8	57.5	75.2	76.4	75.8	75.8	76	74.7	78.3	75.8	67.3
TcaCYP93A88	70	57.1	42.4	56.5	47.2	71	70.4	69.6	69.4	69.6	69.1	70.8	63.1	55.3	59.4	76	75.6	75.4	67.5	72.1	76.1	76	76.2	78.7	65	78.5	78.3	78.3	77.9	70	78.9	77.6	79.9	79.3	77.9	78.7	64	71.4	68.1	56.7	75.4	76.6	75.6	76.4	76.4	74.1	78.7	77.2	67.5
GraCYP93A89	72.4	58.1	44.3	58.3	49.1	73.8	73.6	73	72.2	72.2	72.2	73.4	66.4	56.1	61.4	77.9	77.5	76.7	71.3	74.6	78.8	77.9	79.2	81.8	65.6	80.8	80.6	80	78.4	70.9	81.6	79.8	82.7	82.7	81.2	81.7	66.4	74.2	70.9	59.8	81.2	82.1	80.2	78.8	78.8	76.1	81.2	78.5	67.6
TcaCYP93A89	72.5	58.5	44.2	58.5	48.9	72.9	73.5	72.3	72.5	72.3	72.5	74.1	66.7	56.1	60.2	77.2	78.8	77.4	71.3	76.2	79.2	78.6	79	81.2	66.5	80.2	80	80	78.2	70.8	81.1	78.9	82.5	82.3	80.5	81.7	67.1	74.7	71.7	59.3	79.7	80.1	78.8	78.6	78.8	76.4	79.6	78.7	68.4
PmuCYP93A91	71.6	57.8	44.1	57.5	49.2	72.2	72.4	72.7	72.5	72.2	72.2	72.7	66.1	57.1	62	78	79.4	76.5	71.4	75.5	80.5	80.5	80.6	82.6	68	83.9	84.1	83.3	82.7	75.7	84.8	82.9	85.2	85.1	83.7	85.1	68.4	76.7	73.5	60.2	81.9	83	82.3	81	81	78.6	81	80.4	69
PmuCYP93A92	71.6	57.8	44.1	57.5	49.2	72.2	72.4	72.7	72.5	72.2	72.2	72.7	66.1	57.1	62	78	79.4	76.5	71.4	75.5	80.5	80.5	80.6	82.6	68	83.9	84.1	83.3	82.7	75.7	84.8	82.9	85.2	85.1	83.7	85.1	68.4	76.7	73.5	60.2	81.9	83	82.3	81	81	78.6	81	80.4	69
PpeCYP93A91	71.3	58	43.6	57.6	48.5	71.7	72.5	72.7	72.3	72.1	72.1	72.3	66	57.4	62.1	78.4	80.2	76.4	71.9	76.1	80.7	80.7	80.8	82.4	68.6	84.3	84.3	83.1	82.8	76	84.6	83.5	85.4	85.9	84.3	85.7	68.8	76.8	73.7	60.5	82.1	83	82.5	81.8	81.8	79.2	81.6	80.6	69.4
CsaCYP93A83	69.3	60.4	46.7	60.2	50.8	69.1	69.7	69.6	69.9	69.7	69.8	69.6	67.4	59	64.4	78.2	77.2	74.4	70.8	73.4	77	76.3	76	79.1	69.4	77.3	77.1	77	77.6	74.6	78.9	80.2	79.3	79.8	79.8	80	70.2	75.9	74.2	61	78.2	78.9	78	77.1	77.3	75.7	77.9	76.2	68.3
ClaCYP93A83	71.7	57.8	44.6	57.6	47.7	70.9	72.7	70.9	71.1	71.1	71.1	72.3	69.6	59.2	64.2	79.8	80.8	77.6	71.9	76.7	79.7	79.6	78.5	80.8	67.9	80.4	80.2	80	80.1	73.3	81.1	82.4	82.7	83	82.4	83	68.5	76.4	73.3	61.4	82.1	82.8	81.3	79.8	80	78.2	82.9	79.5	68.9
GmaCYP93A30	71.4	58.7	44.6	58.3	49.5	72.4	72.8	71.6	72.4	72.2	72.4	72.6	66.1	55.8	61.8	76.7	77.1	75.1	68.1	74.6	75.3	75	75.6	76.9	66.1	78.1	77.9	78	77.4	70.6	78.4	77.7	81.3	80	79.6	80.6	65.9	74.2	71	59.1	78.6	79.1	78.9	76.7	77.1	75.3	78.1	77.1	66.5
CcaCYP93A30	72.9	59.5	45.6	58.9	50.9	73.5	73.3	72.7	73.3	73.3	73.5	73.5	65.1	56.1	60.6	76.6	76.4	74.9	69.4	73.3	75.7	75.6	75.4	78.1	65.1	78.3	78.3	78.2	78.2	70.2	79.3	78.2	81.5	81.3	79.1	80.7	64.7	73.3	70.4	57.9	78	78.6	78	76.8	77	75.8	78.4	78.1	66.7
PvuCYP93A60	72.5	59.3	44.8	58.7	50.5	74.1	74.1	73.7	74.1	74.1	74.3	74.9	64.9	55.4	61.4	74.7	76	75	68.4	73.7	76.4	76.1	76	77.5	65.1	78.3	78.5	78.4	77.4	69.6	78.9	78.2	81.1	80.3	79.3	79.3	63.5	71.7	68.6	57.3	77.6	78.4	78	75.6	75.8	74.7	77.3	77.5	66.7
PvuCYP93A61	73	59.1	45	58.5	50.3	72.8	73.4	72.8	73	73	72.8	73	63.2	54.6	59.5	73.6	74	73	66.5	71.8	73.9	73.5	73.8	76.4	63.2	76.1	76.4	76.5	75.6	69.3	77	76.9	78.6	78.7	78.3	77.9	61.8	70.5	67.3	56.9	76.4	76.8	77	74.8	75	74	75.9	75	65
MtrCYP93A78	72.5	58.8	45.3	59.4	50.2	73.4	73.8	73.8	73.2	73.2	73.4	73.8	65.4	55.9	61.7	76.4	76.8	77.1	69.1	74.2	76.3	76	77.3	78.3	66.2	79	79.1	79.2	78.2	71.3	79.3	79.3	81.3	80.3	80.9	81.4	64.5	73.6	70.5	59.2	78.2	79.5	79.3	76.6	76.4	75.6	78.3	76.6	65.8
VviCYP93A9	52.1	63.5	57.5	63.7	62.4	51.9	51.9	52.6	52.1	51.9	52.6	52.4	51.2	49.6	56.8	58.2	60	58.5	56.6	57.3	57.9	57.3	59	61.4	61.1	60.4	60.3	59.7	59.6	58	59.6	59.7	61.2	59.9	59.9	60.3	60	61.1	60.2	49.7	58.5	58.9	58.9	58.9	58.9	56	60	58.5	67.8
VviCYP93A17	53.3	65.2	57.9	65.9	64.7	53.9	54.5	54	54.3	53.9	54	54.8	50.8	49.6	55	57.2	59	57.9	55.8	55.6	58.7	57.6	58.8	61.2	61.6	60.2	59.9	59.5	58.9	57.4	60	60.3	58.9	61.3	61.1	60.7	57.8	60.5	59.3	51.6	58.7	59.5	59.3	57.5	57.7	56.4	60	58.7	65.7
CpaCYP93A11	70.9	57.9	43.2	57.4	47.8	71.1	71.3	70	70.4	70.4	70.7	71.3	63.7	55.6	58.5	73.2	74.4	73.4	68.3	71.7	74.2	74.2	73.6	77.2	62	76.1	75.9	74.4	75.1	68.1	76.7	75.1	78	77.2	75.9	77.1	62	69.4	66	55.1	75.1	75.9	75.5	74.2	74.4	71.3	75.1	74.8	62.9
EgrCYP93A121	72.1	58.9	44.6	59.7	50.1	72.9	72.9	72.1	72.5	72.3	72.9	72.5	65	56.8	64.4	80	79.6	78	71.3	75.1	78.2	77.7	78.8	80.4	67.4	80.6	80	80.5	79.1	70.9	80.5	80.2	81.7	84.3	81.7	82.6	67	75.8	73.5	61.1	80.3	81.7	80.5	78.9	79.3	78.6	81.2	79.5	68
GmaCYP93A19	70.9	57.5	43.3	57.1	49	71.3	70.5	71.1	70.7	70.5	70.9	71.5	67.1	57.3	61	76.6	77	75	70.1	74.4	74.3	73.7	74.6	77.9	64.8	79.2	78.7	78	79.3	72.2	79.3	78.9	79.7	80	79.3	80.2	61.4	71.1	67.9	57.1	76.4	77.2	75.6	75	75.1	72.8	78.6	79.7	68.3
CcaCYP93A109	69.6	56.4	43.4	56.6	48.9	69.6	69.6	68.2	69.8	69.6	69.4	69.6	66.9	55.2	60.7	74.9	77.3	74.6	69.6	73.6	74.1	74	74	77.3	64.3	78.3	77.7	77.4	78.9	71	78.8	79.1	79.9	79.1	79.1	80	62.7	70	67.1	57.6	77	77.8	76.2	74.6	74.6	73.6	77.5	80	69.6
PvuCYP93A62	69	56.1	43.7	55.7	48.2	69.6	69.4	69	69	68.8	68.8	68.8	66.6	55.1	60.3	74.9	76.5	74.2	69	73.4	73	72.7	74	76.6	63.2	76.9	76.4	76.3	76.2	70.2	77.4	77.3	76.8	77.7	77.1	78.1	61.5	69.4	66.4	58.1	76.8	77.2	76.6	73.4	73.6	72.5	75.7	76.9	66.8
MtrCYP93A71	66.4	52.7	41.1	52.8	45.2	67.2	67.6	66	66.6	66.4	66.6	68	64.4	54.4	60.9	74.1	76.8	74.5	70.3	74.8	74.5	74	74	76	63.9	76.7	76.2	76.7	76.6	70.1	76.4	76	78	79.1	77.6	79.3	62.3	70.1	67	56.6	76.4	77.4	76.6	74.2	74.4	71.9	76.7	78.3	65.8
MtrCYP93A72	68.6	55.4	42.6	55.6	48.3	69.6	69.4	68.6	69	68.6	68.8	70.6	67.3	56.8	60.9	76	76.9	75.4	70.6	73.6	76.3	75.6	76.2	78.7	66.7	79.4	79.1	79	78.8	72	78.9	79.1	80.7	81.6	80.3	81	64.7	72.6	69.2	60	79.1	79.9	78.8	77.3	77.5	74.8	78.8	81.6	69.8
MtrCYP93A73	58	67.4	50.5	66.2	57.1	57.4	57.2	57.3	57.7	57.7	57.8	57.3	55.7	55.5	59.2	65.2	65.3	63.6	60.4	60.5	63.3	62.6	63.7	65.3	65.6	66	65.7	66.1	66.1	65.4	65.9	66	66.5	66.7	65.9	67.1	63	66.3	64.9	55.2	64.5	65.7	65.1	64	64.2	61.6	66	66.1	71.8
MtrCYP93A76	61.8	65.5	50.8	64.9	56	61.4	62	60.5	61.9	61.7	61.6	61.5	57.3	55.3	59.9	67.2	68.3	65.7	64.3	64.6	65.3	65.3	66.2	69.2	66.2	70.7	70.2	70.6	70.4	68.8	70.4	69	70.2	70.3	71.4	72	64.4	68.9	68.7	56.9	69	69.6	68.4	66.1	66.3	65.3	69.7	70.5	70.1
MtrCYP93A77	68.6	55.5	43.9	54.7	48	67.3	68	66.9	68	67.6	67.1	68.8	65.5	56.1	60.2	75.5	74.5	72.4	68.2	72.4	74.3	73.9	74.6	76.7	64.5	78.4	77.9	77.8	78.6	70.8	77.6	76.7	78.9	78.5	78.2	80.8	62.9	70.6	67.6	57.3	76.8	77.4	76.2	75.3	75.5	72.7	77.9	79.5	68.2
CarCYP93A115	52.3	64	59.6	64	64.1	51.9	52.3	52	52.3	51.7	52.2	52	47.2	49.1	55	58.2	58.4	57.3	55	55	54.8	55.3	56	59.5	59.2	59.6	59.3	59.3	60	57.6	59.6	59.3	59.8	60.3	60.7	60.7	56	59.1	57.6	53.7	57.5	58.1	58.3	56.4	56.6	54.6	58.4	58.9	66.9
MtrCYP93A74	68.3	55	43.8	55.2	48.9	67.5	68.1	68.4	68.9	68.5	68.9	69.1	66.4	55.8	60.8	74.5	76	73.2	68.7	72	73.4	73.1	73.3	77.1	64.6	77.1	76.2	76.1	76.2	70.3	78.4	77.3	78.6	78.5	77.6	80	62.4	71.5	68.1	56.4	75.6	76.2	74.5	74.8	75	74.3	77.7	79.5	68.1
MguCYP93A99	71.5	58.1	44.8	57.5	49.6	71.1	71.5	71.1	71.2	71.2	71.2	71.8	67.8	57.3	65.3	78.8	80.4	77.8	73.6	76.3	80.5	80	80.6	82.9	68.8	80.8	80.6	80.9	78.9	73.4	82.3	83.2	83.4	83.8	83.1	83	65.9	75.2	71.8	62.3	82.7	82.5	81.3	79.5	79.8	75.8	80.2	80.6	68.5
MguCYP93A100	69.2	56.4	44.2	56.2	48.3	68.8	69.4	69	69.8	69.8	69.2	70	67.7	56.6	64.7	76.8	78.7	76.2	70	73.8	80.5	79.4	80.4	81.6	67.5	79.8	79.1	79.2	78.2	71.2	80.9	80.9	81.5	81.8	80.5	81	64.3	73.6	70.2	60.4	80.3	81.3	79.1	77.9	78.3	75.1	77.3	77.9	66.7
NnuCYP93A45	68.5	54.8	40.4	54.2	46.9	66.7	67.3	67.9	67.7	67.3	67.7	67.7	68.1	56.7	62.5	77.9	76.3	75.4	71.3	76.2	76.2	75.4	75.6	77.9	66.2	77.5	76.9	77.1	74.8	67.9	76.9	75.8	77.9	78.8	77.3	77.9	64	70.4	67.1	57.1	76.7	77.3	76.5	75.4	75.6	73.5	77.3	76.9	63.7
NnuCYP93A46	69.4	56.1	41	55.1	47.2	68.6	68.8	69.4	69.2	68.8	69.4	69.2	67.2	57	62	77.5	77.3	75.1	71.5	76.7	79.4	77.9	77.5	79.2	65.1	78.6	78	78	75.9	68.6	78.6	76.5	79	79.8	78.2	78.8	64.9	71.5	68.2	58.2	77.8	78.2	77.3	76.3	76.5	73.4	77.6	77.1	64.2
MesCYP93A119	68.5	54.8	41.2	54.6	46	69.1	70.3	68.9	68.9	68.7	68.9	68.9	65	59.4	61.7	78.3	76.7	76.9	69.1	74.2	77.8	78.1	76.7	79.3	65.8	80.6	80.4	79.8	76.5	69.9	80.6	78.6	79.8	81.9	78.6	80	63.7	72.4	68.5	60.2	79.4	79.6	79.2	75.9	76.1	75.5	79	76.6	65.6
RcoCYP93A54	67.2	54.1	41	53.9	45.1	68	68.4	67.8	68.2	67.8	68	69	65.5	57.5	61	77	77.1	75.4	69.7	74.9	78.3	78.5	77.1	79.4	65	80.6	80.8	79.8	77.3	70.9	80	79.2	80	80.2	79.2	80.4	64.8	72.6	69.7	59.6	80.6	80.8	79.8	75.2	75.8	74.7	78.5	76.4	65
EgrCYP93A123	56	62.7	49	63.2	53.6	55.8	57	55.5	56.7	56.3	56.6	56.7	54	55	57.5	62.1	65.7	63.2	58.4	60.9	61.8	61.3	60.4	64.1	63.7	63.5	63.4	63	61.6	62.3	63	64.6	64.3	63.8	63.7	63.8	64.6	65	64.9	55	63	63	62.8	60.5	60.9	60	61.2	61	63.4
LusCYP93A116	47.7	59.1	63.3	58.3	69.2	47.1	47.9	46.4	46.9	46.9	46.8	48	45.5	41.2	52.7	51.9	53.5	52	50.3	49.7	51.4	51.9	52.1	55.6	55.9	54.4	54.5	54.1	55.8	54.1	55.4	54.7	54.8	55.4	55.2	54.6	53.4	53.4	52.7	42.8	52.8	53.2	53.2	51.5	51.7	50.6	53	53.3	62.3
LusCYP93A117	72.5	58.7	45.2	58.2	50.9	71.5	72.7	70.3	71.1	71.3	70.5	72.7	67.6	57.8	63.7	80	80.9	77.8	71.3	76.3	77.4	77.3	78.8	81.8	69.2	81.6	81.2	80.9	78.6	70.9	81.9	82.1	82.3	83.8	82.9	82.8	67.8	74.5	71.3	59.5	80.1	80.9	80.3	77.3	77.5	76.2	79.8	80.2	67.2
CsaCYP93A84	73.3	59.1	44.1	57.7	48.8	71.7	72.7	71.3	71.5	71.5	70.8	72.7	64	54.2	59.1	72.9	71.3	71.5	65.8	69.7	72.4	71.9	74	74	63	73.8	73.6	73	74.9	67.8	74.3	74.9	76.6	75.7	74.7	75.7	61.3	68.6	65.6	55.7	72.3	72.5	73.1	72.2	72.4	71.7	74.2	73.3	62.6
ClaCYP93A84	70.9	57.3	42.9	56.7	47.9	70.9	71.5	70.6	72.1	71.9	71.3	71.8	63.2	55.5	60.7	74.1	72.9	72.4	67.9	70.5	72	71.6	72.5	74.8	64.9	74.8	74.8	74.3	75.4	69.3	75	75.3	78	77.1	76	76.5	62.1	70.5	67.5	56.9	73.7	74.1	74.3	74	74.2	73.5	76.5	74	63.5
GmaCYP93A24	70.4	56.1	42.7	56.1	46.8	70.4	69.8	69.2	69.4	69.1	69.6	70	66.5	56.5	60.2	75.8	75.2	73.7	68.3	72.7	74.5	73.3	74	78.1	63.4	78.1	77.9	77.8	76.8	70	77.9	77.2	77.9	78.3	77	78.7	64.2	72.9	69.8	57.3	77.8	78.5	77.4	74.7	75	72.7	77.8	76.4	63.1
PvuCYP93A59	70.8	56.8	43	56.6	47.1	70.6	70.2	72	70.2	70	70	71.6	65.6	56.6	60.3	74.9	74.3	71.8	67.1	71.6	73.7	72.9	73.7	77.1	63	78.6	78.7	78.2	76.5	69.1	79.2	77.6	76.7	78.4	76.8	79.4	63.8	73	69.6	57.8	78	78.6	77.6	75.1	75.5	73.2	76.5	75.6	62.6
CcaCYP93A113	69.4	55.5	42.4	55.3	46.7	69.8	69.8	70	70.2	69.4	69.4	71.2	68.2	57.3	62.5	78.8	76.5	74.5	70.4	74.6	75.9	74.8	76	79.1	64.3	79.2	78.7	78.8	77.8	70.8	79.1	78	78	79.5	79.6	80.4	65.9	73.9	70.8	57.6	78.4	79.1	78.2	76.1	76.3	74.9	78.4	76.6	65.9
LjaCYP93A108	43.4	37.5	34.2	37.3	34.6	45.1	44.6	44.5	45.5	44.7	45	44.8	41.3	54.1	40.8	46	44.8	44.3	41.8	43.2	43.2	43.9	44.2	46.3	47.9	45	45	45.1	45	46.8	46	46.4	46	46.4	47.2	47.6	46.6	43.8	45.2	63.8	46.6	46.8	46	45.8	46	46.4	47	44	39.1
NnuCYP93A49	66.6	53	40.4	52.6	45	67.6	68	67	66.8	66.4	66.6	66.8	66.4	58.3	62.7	76.7	74	73.8	68.5	72	74.5	73.3	74.2	76	61.9	75.7	75.8	74.8	75.7	69.7	77.5	76.3	77.9	80.6	76.7	77.7	61.6	68.9	65.2	56.9	77.7	77.5	76.5	74.2	74.4	71.8	75.7	74.2	61.4
AtrCYP93A79	68	55.1	41.6	54.1	46.9	68.2	68.2	68.4	67.5	67.3	67.5	70.2	67.6	56.5	63.5	79	77.1	77.6	68.8	74	76.3	74.8	74.4	76.7	66.1	76.9	76.6	76.3	75.2	67.6	77.4	77.6	79.3	80.2	77.8	78.5	62.4	70.4	67.3	55.9	76	76.6	76.2	76.1	76.3	72.9	77.9	74	63.9
AtrCYP93A81	67.5	55.2	41.8	54.8	47.2	66.9	68.3	67	67.8	67.7	68.2	69.6	67.4	56.4	62.2	76	75.6	76	70	72.6	72.8	72.7	71.9	75	65.2	75.5	75.4	75.3	73.9	67.8	76	76.5	76.4	78.1	77	76.9	61.8	68.8	65.4	54.4	74.3	74.1	75	74.6	74.8	73	75.7	72.5	65.2
PeqCYP93A93	58.4	63.4	48.8	62.3	53	59.8	59.6	60.1	59.9	59.3	60	59.3	56.7	53.3	60.3	67.8	66.5	63.8	64.1	62.2	64.1	62.4	63.1	64.9	62.8	64.1	63.8	63.6	62.4	60.8	64.5	64	65.7	65.8	64.5	65.4	61.4	66.5	66.2	53.3	65.1	65.1	65.5	63.2	63.6	63.5	65.2	63.8	67.5
PeqCYP93A94	66.6	55.5	42.7	55.1	47	67.4	67.4	67.8	67	66.6	67	67.4	62.5	54.2	60.6	77.5	74.4	71.5	68.5	70.3	72.6	71	72.5	74.4	61	72.8	71.9	72.8	70.5	63.5	72.8	71.8	74	74.6	72.6	74.8	59.8	68	64.9	53.2	74.6	74.4	74.8	72	72.2	70.1	72.8	71.1	61.4
CarCYP93E1	42	51.7	58.8	52.5	59.9	41	41.6	41.5	43.3	43.1	43	41.9	40.9	38	49	44.8	46.7	46.5	47.3	45	45.8	44.7	44.2	44.8	45.3	45.2	45.3	45.3	45.6	47.4	44.4	45.1	46.6	46	46	45.2	44.3	45.8	44.5	36.7	45.4	45	45.4	45.2	45.4	43.6	46	45	53.7
MtrCYP93E1	64.9	52.4	40.9	52.2	44.2	65.1	65.3	64.9	66.5	66.3	66.1	66.5	63.7	54.4	57.5	71.5	69.6	70.4	65.7	69.8	71.6	70.2	70.8	71.9	58.9	73.4	72.7	73	72.1	65.1	72.9	71.5	73.1	74.3	71.7	72.5	57.5	67.1	63.9	54.2	74.1	73.9	73.3	71.3	71.5	69.6	73.4	70.9	59.3
LjaCYP93E1	66.2	52.8	40.9	52.5	44	66	66.8	65.8	66.8	66.8	66.2	67.6	64.4	55.2	56.6	71.1	69.7	70.5	66.8	70.3	71.8	70	70.6	71.1	58.7	72.2	71.9	72.4	71.3	65.2	71.5	72.1	72.7	73.2	72.7	72	58.2	67.8	64.8	55	73.1	73.1	72.7	71.4	71.6	68.8	73.4	69.6	59.9
GmaCYP93E1	64.4	51.3	40.1	51.1	43.2	65.9	65.9	66.1	66.1	65.9	66.3	65.9	63.6	55	58.3	70.5	71.6	71.6	66.1	71	71.6	69.8	69.8	71.3	58.3	72.4	71.9	72	70.4	63.6	72.5	71.4	72.7	73.8	72.8	72.6	56.8	66.3	63.2	53.8	72.5	72.3	72.5	71	71.2	68.7	72.2	69.6	60.5
PvuCYP93E1	64.8	51.9	40.5	51.9	43.8	65.6	66	65.6	65.2	65.8	65.6	65.4	61.9	54.8	57.2	70.3	70.3	71.1	65.8	70.1	71.4	69.5	69.8	71.1	58.9	72.4	72.1	72.2	71	65	72.1	72.1	71.5	74.2	73.3	71.4	57.8	67.4	64.2	55	73.3	73.3	72.7	70.6	70.8	68.4	72.4	69.6	59.3
CcaCYP93E2	28.5	34.8	45.7	34.6	40.7	27.5	27.7	28.1	28.1	27.9	28.2	27.6	28.5	24.7	35.5	31.2	31.3	31.1	32.7	30.9	31.7	30.3	30.4	31.8	27.3	32	32	32.3	32.2	31.2	31.4	30.8	32	32.3	32.3	31.9	31.4	32.1	31.9	28.7	31.8	31.6	32	31.3	31.3	29.7	31.3	32	38
CcaCYP93E1	40.6	34.3	40.9	34.6	38.4	41.8	42.6	41.3	41.5	41.1	40.6	42.1	38.3	50.6	40.1	41.8	41.4	41.9	38.5	40.9	41.3	41	41.9	42.1	45.7	42.9	42.2	42.4	41.5	43.9	43.1	43.7	42.9	43.8	43.5	42.5	41.7	40.9	42.4	58.8	43.9	44.1	43.7	41.7	41.9	44	42.7	40.9	41.7
AcoCYP93H2	63.5	52.3	41.7	52.5	46.2	62.9	63.3	61.5	63.8	63.5	63.1	63.3	63.5	52.7	57.7	71.3	73.3	72.7	66.7	68.3	71.9	70	71	73.1	60	71	70.8	70.4	69.6	62.5	71.3	69.8	72.7	71.9	72.9	72.3	59.6	66.5	63.3	52.3	72.3	72.5	72.7	70	69.6	67.1	71.3	72.1	61
AcoCYP93H3	64	54.1	42.1	53.7	46.9	62.4	62.4	62.1	62.9	62.3	62.4	61.7	62.3	52.1	57.9	71.1	73.1	73.4	69.5	69.7	69.7	67.6	67.9	71.1	60.1	68.2	68.2	68.1	67.3	62.1	69.4	68.6	70.4	70.8	72	70.5	60.3	65.3	62.1	51.1	70	69.8	69.8	69.1	68.9	67.3	68.9	69.2	60.9
AcoCYP93H1	62.3	50.6	40.6	50.6	45.7	63	61.5	62.1	62.8	63	63.2	61.9	61.5	52.6	55.5	68.1	68.7	68.5	66.2	68.1	67.4	67	66.2	67.9	56.8	67.4	66.8	66.8	67.5	58.9	68.3	66.8	67.9	69.2	68.9	69.6	57.2	62.8	59.6	49.4	68.1	68.3	69.1	66.8	67.2	64.9	67	68.3	57.7
GmaCYP93C5	61.4	51.6	40.1	50.8	44	61.8	60.7	61	62	61.8	62	61.2	62.6	52.7	53.9	67.1	65.9	68.2	62.8	66.7	67.6	67.2	67.1	67.2	57	68.6	68.8	67.1	68.4	61.2	68.6	67.2	68.2	67.2	67.1	69.8	55.8	63	60.1	50.4	67.6	68	67.6	65.7	66.1	64.5	67.2	66.1	55.8
GmaCYP93C1v2	62.7	52.9	39.1	52.1	44.7	62.9	62.1	61.7	62.5	62.3	62.5	61.7	62.9	53.5	54.7	68	66.8	68.6	63.1	67	67.2	66.6	66.9	67.1	57.2	69.5	69.8	68.3	69.4	61.9	69.6	68.4	69	68	67.6	70.1	56.4	62.7	59.8	50.4	67.4	68.2	67.3	64.8	65	64.8	68.5	67.2	57.4
BvuCYP93C11v1	60	51.5	39.8	50.7	44.7	60.6	59.8	59.5	61.3	60.9	61.2	59.3	60.7	52.3	53.3	65.8	67.3	67.1	64	65	65.1	65.1	64.4	65.1	58.8	67	67.2	66.3	66.5	61.6	67.1	67.4	66.5	66.5	66.5	67.5	56.5	62.8	59.8	50.1	64.9	65.1	65.7	64	64.2	64.7	65.8	64.5	56.7
BvuCYP93C11v2	62	52.2	40	51.4	45.6	62.6	62	60.9	62.7	62.3	62.6	61.3	61.3	53	53.6	67	67.9	68.1	64.1	66.3	66	66.2	65.4	65.9	58.8	68.2	67.6	67.1	67.1	62.2	67.8	68.6	67.8	67.5	67.3	68.9	57	63.9	60.8	51.4	66.3	66.9	66.7	65	65.6	66.1	66.8	65.3	58
PvuCYP93C25	58.9	49	38.6	48.3	42.5	61	60.2	60.2	61.6	61.4	61.4	60.2	61.4	50.8	53.7	65.6	65.3	66.6	61.6	65.8	66.6	65.5	66.2	66	55.2	67.8	67.8	66.6	66	59.8	67.8	66.8	67.4	66.2	65.6	68.1	55	61.2	58.5	49.6	66	66.2	66.2	64.1	64.3	63.7	67	65.6	55.2
PvuCYP93C28	58.2	49.7	37.8	49.3	42.4	58.4	58.8	57.7	59.7	59.3	59.4	58.1	57.7	56.2	51.8	60.5	61.4	62.6	58.6	60.5	61.2	60.7	60.2	61.4	58	61.4	62	60.3	61.2	58.5	61.8	61.1	61.4	60.7	61.9	62.8	53.2	58.5	55.9	53	60.2	61	59.8	59.1	59.3	59.6	61.7	59.7	51.8
PvuCYP93C26	61.6	51.1	38.8	50.1	43.7	62.1	62.1	61.6	61.6	61.4	61.6	61	61.7	52.2	54	66	66.2	67.8	61.6	65.8	66	65.8	66.3	67.8	56.3	68.3	68.2	67.2	67.4	61.6	68.5	66.8	67	66.6	66.6	68.7	55.3	61.4	58.1	49.7	65.6	66.2	65.6	63.9	64.1	64.3	67.4	67.1	55.5
CcaCYP93C32	28.3	35	44.7	34.8	40.7	28.1	27.7	28.5	28.7	28.3	29	28.2	29.4	25.9	34.3	30.6	31.5	31.9	32	32.3	31.3	29.8	29.4	31.2	29.6	31.7	31.4	30.7	31.8	29.9	30.8	30.6	30.8	30.5	31	31.3	31.1	32.9	30.8	24.2	30	30.6	30.4	30.1	30.1	28.7	31.8	30.2	35.6
MtrCYP93C20	60.7	50.8	39.8	49.6	44.9	61.1	61.7	61.5	61.1	60.9	61.3	60.4	64.1	52.3	55.1	68.9	67	67.6	63.3	66	68.1	67.9	67.7	66.5	57.6	68.3	68.6	67.5	68.6	60.9	69.8	67.8	68.6	67.6	67.8	68.9	55.5	62.7	59.4	49.8	66.9	66.9	66.5	65	65.2	65.2	68.2	67.8	57.2
MtrCYP93C27	60.2	50.6	39.4	49.6	43.4	61.2	61.4	60.6	61	60.8	61.2	60.6	63.5	51.9	54.6	67.4	66.2	67.2	62.9	65.4	67.8	68.3	67.5	66.8	56.2	68.7	68.7	67.2	67.2	60.6	68.7	67.4	67.8	66.8	66.8	68.1	55.6	62.2	59.1	49.2	66.4	66.8	66.8	64.7	64.9	63.5	68.1	66.4	57.1
MtrCYP93C19	59.5	50.8	39.4	49.6	44.4	61	60.4	60.6	60.6	60.2	60.6	60.4	63.1	51	53.5	67	65.6	66.6	62.5	64.7	67.4	67.6	67.7	66.4	56.8	67.6	67.4	66	66.6	60	67.8	66.6	66.6	65.6	65.4	67.6	53.7	60.8	57.5	48.6	65.8	66.2	66	64.1	64.3	62.5	67.4	65.8	56.2
CarCYP93C3	62.6	51.9	40.8	51	44.8	63.4	62.5	62.6	63.8	63.6	63.4	62.1	62.6	52.5	55.2	67	67.4	68.6	63	66.3	68.4	69.1	67.6	68.4	57.5	69.7	69.2	67.6	67.8	61.3	68.6	69	69.2	67.8	67.4	68.8	55.7	63	59.2	49.8	66.7	67	66.7	65.1	65.3	64	70.5	67.4	56.9
CarCYP93C31	62.6	52.5	41.1	51.8	44.4	63.2	62.8	61.5	62.6	62.5	62.6	62.6	63	53.3	54.9	68.1	67.1	68.5	62.6	66.5	68.3	68.1	67.9	66.7	57.2	69.3	69.4	67.9	68.3	61.1	68.7	69.1	69.6	68.1	66.9	68.9	55.8	61.9	58.6	49.6	66.9	67.7	66.7	63.8	64	64.4	69.5	66.5	57
LjaCYP93C17	63.2	53.7	41.1	52.9	45.3	62.8	63	62.8	63.8	63.6	63.6	62.1	62.8	53.5	54.7	68.5	67.9	68.3	63	66.9	68.7	68.5	67.1	67.1	57.2	68.7	69.4	67.5	68.1	61.9	68.7	68.1	68.9	67.9	67.1	69.1	56	61.9	58.6	51	68.5	68.9	67.9	65.4	65.8	64.8	69.1	66.5	56.2
LjaCYP93C29P	51.5	51	34.8	50.5	40.9	51.7	51.7	51.6	53.1	52.7	52.4	51.8	51.2	67.7	49.9	56	53.5	55.3	51.5	53	53.5	53.8	52.5	52.7	61.8	53.6	54.5	52.7	53	56.3	54.6	54.9	54.8	55.2	54.6	55.2	52.2	49.1	47.5	64.9	53.4	53.8	53.2	50.9	51.3	52.6	54	52.9	50
LjaCYP93C30	63	52.9	40.5	52.3	44.6	64.2	62.8	63.6	63.8	63.6	64	62.6	62.8	53.1	55.3	69.5	67.7	69.5	64	67.9	68.7	68.5	67.7	67.8	58	69.7	70.3	69.1	68.9	62.3	69.8	68.5	69.1	68.7	67.9	69.6	56.6	63	59.3	50.6	67.9	68.5	67.5	65.4	65.8	65.8	69.1	68	56.6
MguCYP93B36	64.8	52.7	41.1	52.8	45.8	64.6	65	64.4	65.4	65	65.4	63.7	64.8	56	60.3	73.9	70.9	71.7	67.2	71.4	70.3	68.7	70.6	70.3	60.9	70.1	69.8	70.2	70.2	63.1	71.7	71.5	71.3	70.5	70.9	70.5	60.5	66.8	63.1	52.7	70	70.4	70	67.5	67.9	68.6	71.8	70	57.4
MguCYP93B37	64.5	52.1	41.6	52.1	45.3	65	65.4	64.5	65	64.6	65.4	65.6	65.2	54.1	59	70.7	69.7	69.9	66.4	71.7	69.3	68.9	69.2	70.2	58.4	69.9	69.4	68.9	68.8	61.3	71.2	69.3	71.5	70.1	68.6	70.9	60.4	66.6	63.7	52.1	70.2	70.8	70	67.6	67.6	67	70.7	69	58.4
PpeCYP93B40	64.1	52	40.2	52.4	44.2	66.2	66.3	64.6	65.6	65.4	65.4	65.2	62.5	52.4	56.4	69	68.6	68.3	63.9	67.3	68.5	68.7	68.8	69.4	55.4	69.6	69.8	69	68.6	62	69.6	69.8	71.5	70.2	69.8	70	58.3	64.6	62.1	50.7	69.2	70	69.8	69.6	70	66.5	70.2	69.2	57.2
PpeCYP93B41	63.5	51.2	40.3	52.2	43.8	65.6	66	64.4	65.6	65.2	65.8	65.2	61	51.1	56.2	68.3	67.9	68.1	63.1	66.7	68.3	68.3	68.8	68.8	54.7	69.4	69.6	68.8	68.5	60.8	69.6	69.2	71.5	69.6	68.8	69.8	58.3	64.8	62	50.9	68.6	69.2	69.2	68.3	68.6	66.5	69.8	69.6	57.6
PpeCYP93B42	65.2	53.2	41.1	53.7	45.5	66.3	66.3	66	66.3	66.3	66.3	67.1	62.3	52.6	56.8	70.2	69.2	68.5	64.6	67.9	68.8	69.5	69.2	70	57.2	70.4	70.2	70	69.4	62	70.4	69.6	72.5	70	69	70.4	59.1	66.2	63.1	51.1	69	69.8	69.6	69.6	70	67.3	70.4	70.6	58.3
MdoCYP93B45	66.5	54	41.9	54	46	66.5	66.7	66.5	66.7	66.5	66.9	66.9	62.7	53.3	56.7	68.7	68.8	69.2	64.6	68.1	68.5	67.6	68.3	67.9	56.9	69.6	69.8	69.4	68.8	61.5	70.4	70.2	70.2	70	69.4	70.4	58.5	64.2	61.7	51	68.7	69.4	69.4	68.5	68.8	66.5	69.8	69	56.9
PbrCYP93B43	37.8	46.3	47.6	46.3	48.8	38.2	39.2	37.9	38.5	38.5	39.2	37.5	36.8	46.9	37.6	38.3	40	39	40.6	38.2	37.8	38.5	37.3	38.2	45.5	38.1	38	37.9	37.8	38.5	38.2	38.5	37.6	38.4	39.1	38.6	39.3	39.1	37	47.9	38.2	38.4	39	36.4	36.6	36.7	38.8	37.8	43.3
MdoCYP93B15	65.1	51.9	41.2	52.7	44.3	65.1	65.3	65.1	65.7	65.7	65.7	66.5	65.3	53.1	55.4	68	69.2	69	64.4	68.6	68.8	69.3	68.6	69	58.6	69.5	68.8	68.8	68.2	61.3	68.8	68.6	69.3	69.7	69.5	70.1	58.6	63	61.1	50	68.2	69.3	68.4	68	68.4	66.5	69	69.3	57.9
MdoCYP93B44	66.1	53.8	42	54.3	45.3	65.9	66.7	66.5	66.5	66.7	66.7	66.3	64.5	54.1	56.5	71.7	69.6	68.6	65.9	69.7	71.7	71.6	71.3	70.3	59	69.2	69	68.6	69.6	62	69	69.6	70.3	70.3	70.7	70.3	58.8	64.4	61.7	51.8	69.9	70.3	69.4	69.2	69.6	68	70.3	71.1	58.2
MdoCYP93B46	68.6	55.1	43.1	55.1	46.2	68	68.8	68	68.4	68.4	68.6	67.8	66.2	55.1	56.9	72.7	71.1	69.5	66.8	69.9	71	70.6	70.4	69.8	60.1	69.5	69.2	69.1	70	63.4	69.6	70.6	70.4	71.2	71.9	72	60.9	66.2	64	52.6	70	70.4	69.6	69.1	69.5	69.8	70.3	71.3	60.7
MdoCYP93B47	64.8	56.2	43.6	56	47.9	64.2	65.3	63.6	65.9	65.9	66	65.1	64.4	54.3	59.5	66.8	67.9	67.1	65.7	67.1	67.2	67.7	66.5	67.1	59.1	68.2	67.6	67.9	67.8	65.4	67.4	68	68.4	68.1	67.9	69.9	61.7	67.1	64.4	51.6	67.1	67.3	67.3	65.9	66.1	68.3	68.2	68.4	60.1
FveCYP93B51	65.2	52.7	41.2	52.9	45.7	65.8	66	65.2	64.6	64.4	64.8	65.6	65	55.1	56	70.2	72.2	71.2	68.1	71.6	70.1	70	70	70.9	59.9	71.5	71.3	71.6	70.8	63.8	71.6	71.2	71.2	70.6	71.8	72.6	60.9	66.7	63.6	52.3	70.4	71.2	71.2	69.1	69.5	68.3	71.3	70.5	60.3
FveCYP93B52	65.2	52.5	39.9	52.5	44	65.4	65.8	65.2	64.2	64.2	64.4	65.6	64.8	55.1	56.6	70.8	71.6	70	67.9	72.4	70.3	70.4	69.2	70.5	58.8	70.7	70.3	70.6	70	63.2	72	71.2	72.4	71	70.8	71	60.1	66	62.8	52.5	70	70.6	70.6	69.8	70.2	68.7	70.3	70.2	59.5
FveCYP93B48	64.3	52.2	40.9	52.8	44.8	64.7	65.7	64.5	64.9	65.1	64.9	64.1	64.9	53.2	55.2	69	69.8	69.8	66.7	70	68.5	68.5	67.7	70	57.1	70.5	69.6	69.8	69.4	62	70.4	69.8	70.6	69.4	70.2	70.6	57.3	63.7	60.4	51.5	69.6	69.4	69.8	68.8	68.8	67.1	69.3	68.8	58.1
FveCYP93B49	64.9	52.4	39.6	52.4	43.7	64.1	64.7	64.3	64.5	64.5	64.5	64.3	65.3	54.8	56.3	70.8	71.9	71.2	66.5	70.8	70.5	69.5	68.1	70.7	58.3	69.9	69.8	70	69.6	62	71.2	70.8	71.2	70.2	70.6	71.7	57.5	64.1	61	52.8	69.8	70.4	70	70.4	70.6	66.9	71.5	69.8	56.3
FveCYP93B50	64.1	52	39.2	51.8	44.1	64.9	66.2	64.3	64.1	64.3	64.5	64.7	62.1	52.2	54	69.1	71.8	69.9	67.6	69.1	69.5	69.1	69	69.2	56.5	70.1	69.8	69.9	69.9	61.7	70.3	69.5	69.5	70.1	68.7	69.7	58.6	65	62.1	52.4	70.3	71.1	71.1	70.9	71.3	68	69.5	69.8	57.9
MtrCYP93B10	64	52.3	40.9	52.1	45.6	65	65.2	64.4	64.4	64.4	64.4	64.8	67.9	55.8	57.5	70.6	69.1	70.8	65	68.5	70.7	71.4	70.4	69.4	60.7	70.5	70.3	69.6	71.3	63.4	71	69.7	71.5	71.6	69.7	72	59.5	65.2	61.8	53.6	70.2	70.4	70	67.5	67.7	66.3	70.7	71.5	58.9
MtrCYP93B11	63.3	51.6	40.2	51.4	44.9	65.1	65.5	64.7	63.7	63.7	63.7	65.1	67.6	56.1	57.1	70.2	68.8	70.6	65.3	68.1	70.7	70.6	69.6	68.8	60	70.9	70.5	70	71.2	63.9	71	69.6	71.2	71.4	70.4	71.8	60.2	66.1	62.7	53.7	70.2	70.4	70.2	67.9	68.1	67.3	70.9	71.1	58.8
CcaCYP93B61	66.3	53.6	41.4	53.3	46.2	66.3	65.9	66.5	66.3	66.3	66.3	65.5	67.3	55.6	58.8	72.1	71.4	72.4	67.3	70.6	72.2	71.2	71.2	71.9	61.1	71.8	71.1	71.6	70.8	64.5	71.2	71.2	72.1	72.4	71	71.2	61.9	67.3	64.1	53.6	71	71	71	70.1	70.3	68.6	71.3	72.9	60.2
GmaCYP93B16	63	52	41	51.6	45.2	64.1	64.5	64.7	63.8	63.4	64.1	64.1	63.6	54.3	58.6	71.9	71.3	71.2	64.5	69.8	70	71	70.4	73.1	59.4	71.5	71.5	71	70.2	62.8	71.9	70.2	72.7	71.7	70.2	69.3	57.5	64.7	61.9	52.9	71.3	71.2	71.2	68.5	68.9	67.9	71.3	69.6	59.8
GmaCYP93B19	63.4	52	40.2	51.6	44.8	63.9	63.9	63.6	63.2	62.8	63.6	64.3	62.2	53.9	58.1	71	70.2	70.2	64.7	69.3	69.8	70.2	70	72.5	59.4	71.5	71.3	71	70.2	62.8	71.9	69.4	72.3	71.5	70.2	69.3	57.1	64.7	61.7	52.9	70.8	70.8	70.2	68.1	68.5	68.7	71.2	69.6	58.6
PvuCYP93B24	64	53	41	52	44.6	64.8	65	65.1	65.3	65.1	65.3	64.4	63.4	54.3	56.8	71.4	71.6	69.7	65.1	69.1	70.5	70.5	70.5	73	60.6	72	71.4	71.2	70.1	63.6	71	70.3	73.1	72.6	69.9	70.1	58.5	64.8	62.1	53	71	70.5	71.4	69.1	69.3	68.8	71.2	69.7	59
CcaCYP93B62	64.6	52.8	41.1	51.8	45.1	65.4	65.8	65	65.6	65.2	65.8	65.2	65.4	55.1	58.5	73.2	69.4	69.8	64.4	68.5	70.4	70.6	70.4	71.5	59.1	70.7	70.4	70.4	69.6	61.8	70.7	69.2	72.7	71.5	69.6	68.8	58.9	65.4	62.9	52.6	70.6	70.6	70.6	68.8	69	68.6	70.9	69.6	58.9
CarCYP93B60	51.5	61	53.4	60.3	55.7	51.5	51.3	52	52.7	51.7	52.4	50.4	51.2	49.9	53.8	55.2	56.2	54.7	54	54	53.3	51.9	52.5	53.5	51.2	53.2	52.5	52.7	52.4	52.2	53.6	53	54.4	54.4	54.6	53.4	54.6	54.2	54	45	52.6	52.6	52.8	51.3	51.7	52.8	53.2	53.1	60.2
MtrCYP93B12	65	52.8	40.3	52	45.1	64.8	64.6	65.2	65.6	64.8	65.4	63.5	66	55.1	55.6	70.2	69.6	69.2	63.9	67.7	70.2	70.4	70.2	69.8	58.5	67.9	68.1	67.9	67.9	60.6	69.2	67.7	71.7	69.8	69	69.8	57	63.3	61.4	50.9	68.6	68.5	69.4	67.5	67.9	67.7	69.8	69	58.7
MtrCYP93B31	65.2	53.4	40.9	52.7	45.8	65	65.2	65.7	65.9	65.2	65.5	64.8	66.3	55.7	57.2	70.8	69.9	69.5	63.6	68.9	70.8	71.8	70.6	70.6	59.3	68.8	69.5	68.8	69.5	62.1	69.7	68.8	72	70.5	70.3	70.1	57.4	64	61.6	51.5	68.9	68.9	69.7	68.2	68.6	67.8	70.5	69.1	59.8
MtrCYP93B28	64.4	52.7	40.7	51.7	45.2	65.4	65	65.6	63.9	63.7	63.9	64.1	64.6	54	56.5	71.7	70	69	66.5	69.8	69.6	68.8	68.4	70.7	58.7	69.2	68.8	69	68.8	61.6	69.6	68.1	70.5	70	70	70.5	57	63.7	61	50.8	68.6	68.6	69.4	68.1	68.4	65.8	70	68.1	59.3
TcaCYP93B53	66.9	54.1	42.2	53.9	45.5	66.5	65.5	66.9	65.7	65.7	65.9	66.7	64.5	57.6	59.7	74.4	74.4	72.6	69.2	73	72.4	71.9	73.3	75	62	75.5	75.1	74.8	74	66.9	75.1	74	76.3	76.3	75.1	75.3	59.7	68	65.1	55.7	73.4	74	72.4	70.7	71.1	70.5	74.6	72.8	59.7
TcaCYP93B54	66.7	54.1	41.7	53.9	45.5	66.5	65.1	65.7	65.1	65.3	66.1	66.3	64.5	58.1	60.9	74.2	72.7	74	66.5	71.3	72	71.6	71.2	74.2	60.9	73.8	73.4	73.4	73.1	65.1	74.4	72.7	74.8	74.2	73.6	73.8	60.7	66.9	64	56	73.1	73.4	72.1	70.2	70.5	70	73.6	72.1	59.1
GraCYP93B35_D	68.6	55.9	43.3	55.8	47.4	67.8	67.4	68	67.8	67.8	68	66.1	65.7	57.7	59.6	72.5	74.3	72.9	68.8	71.5	72.2	70.4	71.2	73.1	61	75.1	74.6	74.5	74.1	65.9	76.4	75.6	75.8	74.3	73.7	74.5	60.2	68.6	65.7	54.4	72.3	73.1	72.5	71.5	71.9	70.8	73.4	72.5	60.6
CclCYP93B26	67.1	54.5	42.5	54.1	46.1	67.9	68.3	67.8	68.6	68.8	67.6	67.3	65.2	58.8	62.4	73.3	75.6	74.8	70.4	72.4	72.6	72.3	73.8	73.8	61	71.5	70.9	72	71.5	66.2	72.7	73.1	74.7	75	74.6	74.8	62.2	70.2	66.4	55.7	73.9	73.9	73.7	70.5	71	71.2	72.8	72.5	62.2
CclCYP93B27	67.7	54.9	43.3	54.7	47.5	68.7	68.9	68.4	69.4	69.6	68.4	67.9	65.2	58.8	61.8	72.7	75.6	74.2	70.2	72.6	72	71.8	73.3	74	61.2	71.7	71.1	71.8	71.7	66.4	72.9	73.9	74.5	75.1	74.8	74.6	62	69.8	66.4	55.5	73.1	73.5	72.9	70.1	70.6	71.4	73	72.5	62.2
CsiCYP93B27	66.7	54.4	42.8	54.2	47	67.7	67.9	67.6	68.9	68.9	67.8	66.9	65	59	61.8	72.5	75.2	73.8	70.5	72	71.8	71.6	73.1	73.6	61.2	71.3	70.7	71.4	71.3	66.7	72.5	72.9	73.9	74.8	74.2	74.4	63.1	70.5	67.5	55.2	72.9	73.3	72.7	69.9	70.5	72.3	72.6	71.9	62.4
PtrCYP93B8v1	65.8	54.8	41.3	53.7	46.1	66.4	66.4	66.2	66.6	66.4	66.4	66.6	65.8	55.4	60.2	72.4	70.1	71.8	69.7	74.5	71.2	70.6	69.6	73.9	60.4	71.4	71.2	71.2	70.5	62.5	71.6	71.2	73.6	71.4	70.7	72.2	58.7	65.4	62.5	51.5	70.1	70.3	69.9	68.5	68.7	68	72.4	70.8	60.2
PtrCYP93B8v2	66	54.4	41.6	53.2	46.4	67	66.4	66.4	66.8	66.6	66.8	66.8	66.2	55.3	60.6	72.6	70.5	71.7	69.9	74.8	70.8	70.2	69.2	74	60.6	71.5	71.1	71.1	70.7	62.7	71.7	71.5	73.4	71.7	70.9	72.4	59	65.6	62.7	51.5	70.1	70.3	69.9	68.7	68.9	68.2	72.6	70.9	60.6
PtrCYP93B7	67.4	55.5	41.6	54.5	46.5	67.2	67	67.2	67	66.6	67	66.8	66.8	56.1	60.9	73	74.4	73.8	70.1	74.2	71.2	71.2	70.4	74.2	60.9	72.4	71.9	71.6	71.9	63.5	73.5	73	75.2	72.7	73	73.8	58.6	66.4	63.3	53.9	72.1	72.7	72.5	70.9	71.1	69.5	73.4	72.9	60.4
MesCYP93B56	66.9	54.2	43.3	54.4	47.1	66.2	67.1	66.2	66.9	66.7	66.3	67.3	66	55.8	61.7	73.3	73.7	72.3	70	73.7	71.9	71.6	71.5	73.7	60.8	72.3	72.9	71.9	72.7	65.2	73.8	73.7	75.2	73.8	73.7	74.4	59.6	68.3	64.8	53.3	72.3	72.5	73.5	71.2	71.3	69	74.2	71.9	61.5
RcoCYP93B22	65.9	53.9	41.8	53.7	46.9	65.1	65.7	64.4	65.1	65.1	65.4	66.1	65.2	57	62.2	71.5	71.1	69.7	68.7	69.1	68.9	68.1	67.7	69.6	58.2	70.1	69.8	69.5	71	67.7	70.4	70.8	72.1	71	73.2	72.4	63	67.3	63.2	52.1	69.6	70.6	69.2	69.3	69.3	70.7	70.9	70.2	59.8
MesCYP93B57	60.6	62.3	48.5	62.3	53.3	60.8	60.6	60.9	61.1	61.1	61.2	60.5	58.5	54.2	56.2	63.7	65.3	64.8	63.1	63.6	64.7	64.1	63.3	65.3	59.7	64.3	63.8	64	63	62.3	65.1	64.8	64.9	64.4	66.1	64.2	59.3	66.1	65.3	51.5	63.2	63.2	63	61.8	62.2	62.2	64.5	63.8	64.3
LusCYP93B55	68.5	55.8	43.1	55.8	48.1	67.5	67.5	67.5	68.1	67.7	67.7	66.5	65.6	54.8	60	71	71	71	66.3	71.3	72.5	71.4	70.2	70.2	59.2	70.6	70.4	70.4	70	62.3	71.2	69.4	71.5	70.6	70.8	71.2	58.7	65	61.7	52.3	70.2	70.4	70.6	69.2	69.4	66	70.6	71.7	60.2
LusCYP93B59	68.3	56	42.9	55.6	48.1	66.9	67.7	66.7	67.9	67.5	67.7	66.3	65.8	55.4	59.6	71	71.9	71.5	66.7	71.3	72.5	71.6	70.8	70.8	59.2	71	71	70.4	70.2	63.1	71.2	70	71.5	71.2	70.4	71	58.5	65.2	61.9	52.3	70.4	70.6	70.8	69.4	69.6	66.2	71	72.3	60
EgrCYP93B58	66.1	57	42.8	56.4	48.6	66.5	66.5	66.2	67.5	66.9	67	65.9	64.2	56.6	59	72.1	74.5	73.2	71.5	72.4	72	71.2	72.5	73.4	62.4	71.7	72.1	72.2	72.1	65.1	73.5	73.5	73.3	73.4	71.4	71.8	60.8	68.7	65.3	56	71.5	72.3	71.3	69.9	70.5	70.7	72.2	72.1	62
CanCYP93B38	61.9	51.7	39.8	51.7	44.5	62.6	62.1	62.3	62.1	61.7	62.3	62.5	60.2	53	54.3	67.4	66.2	66.4	65.1	66.4	67.9	67.2	67	66.8	57.4	66	66	65.5	66.4	60.2	66.4	65.3	68.3	68.3	67.5	68.7	55.7	62.3	60.2	49.8	66	66	67.2	65.3	65.7	64.7	66.8	67.9	56.8
CanCYP93B39	64.5	53.6	41.9	53.2	46.2	64.9	64.9	65.7	65.3	64.9	65.7	64.5	62.8	54.4	57.5	70.2	68.4	68.4	67.1	68.4	68.3	67.7	68.5	68.8	58.1	68.9	68.4	68.5	68.6	62	68.8	67.6	69.8	70.6	69.2	69	58.1	63.2	60.8	49.9	67.3	67.4	68	67.1	67.6	66.5	68.7	69	58.1
BdiCYP93G2	58.7	47	37.5	47	41.8	58.7	58.7	59.9	58.3	58.5	58.3	59.1	65	55.2	54	66.2	66.6	66.2	62.7	62.8	62.7	62.8	63.7	64	54.2	65.6	65.1	65.2	66.5	61.5	66.7	65	64.9	66.1	66.4	66.1	56.2	60.9	58.5	50.5	65.9	66.5	66.1	64.8	65	62.1	64.9	63.6	55.6
HvuCYP93G2	59.7	47.8	37.2	47.4	41.9	59.9	59.9	61.5	59.1	59.3	59.7	60.7	67	55.3	55.3	67.2	68	66.3	62.8	63.8	62.9	62.2	64.6	65.3	54.9	66.6	66.1	66.7	65.9	61.5	66.3	65.8	65.5	66.9	68	66.9	55.5	60.9	58.1	51.4	65.3	66.1	66.1	64.8	65.2	63.8	65	63.2	55.3
ZmaCYP93G5	58.1	46.9	37	46.3	41.5	58.5	58.5	58.9	57.4	57.2	57.8	58.9	64.1	54.8	53.5	65.7	66.5	64.7	61.8	62.6	64.1	63	64.6	67.2	54.3	66.9	66.5	66.7	67.1	60.3	67.1	65.5	65.5	66.7	67.1	67.2	55.8	61.2	58.7	49.8	65.7	66.5	66.1	65.3	65.5	62.8	65.3	65.3	56.2
SbiCYP93G4	58.8	47.4	37.5	46.8	42.2	58.8	60	60	58.6	58.4	59	59.2	66	53.8	54.5	66.2	66.5	65.8	61.1	63.8	64.5	63.5	66.5	67.1	54.2	67.5	67.1	67.7	66.9	60.5	67.5	66	65.8	67.1	66.7	67.3	56.3	60.7	58	50.3	66.5	66.7	66.9	64.8	65	62.9	66.9	65.6	56.3
SbiCYP93G3	57.6	47	36.8	46.6	41.8	58	57.4	58.8	57.8	57.6	58	58.4	64.2	53.4	53.8	65.1	65.7	63.2	59.3	63	63.4	63.7	64.2	65.9	52.8	66.1	65.7	66.1	64.9	59.5	66.7	64.2	65.5	66.3	66.5	66.3	55.7	60.9	58.2	49.3	65.7	66.1	66.5	64.7	64.9	61.5	66.1	64.9	56.5
StiCYP93G13	58.7	47	37.6	47	41.9	59.1	59.7	59.9	58.9	58.7	59.3	59.3	66.1	55	52.6	65.9	65.9	64	60.7	62.4	61.4	61.5	62.5	65.1	53.8	66	65.3	66.3	66.1	60.7	66.5	65.6	64.5	66.3	66.5	65.8	56.4	60.7	57.9	49.3	65.1	65.5	66.1	65.4	65.8	62.6	66.8	65.5	56.2
EguCYP93G1	64.6	52.4	40	52	45.5	64.4	63.1	64.4	64.2	64.4	64.4	63.8	70.6	62.5	58.8	73.1	72.5	70.8	67.9	71.2	72.2	71.6	72.5	72.1	61.5	73.7	74.5	73.9	73.7	66.2	75.4	71.4	74.5	74.5	74.5	75.2	60.3	67.3	64.2	53.8	73.1	73.7	72.9	70.2	70.4	68.9	74.7	72.9	60.9
OsaCYP93G2	56.8	45.1	36.6	44.9	40.5	58.2	58.8	59.7	58.6	58.4	58.6	58.6	64.8	54.5	54.5	66.7	65.6	63.6	61.7	63.6	63.3	62.6	64.2	64.3	54.3	65.8	65.1	66	66.1	60.7	66.9	65.8	64.6	66	65.6	65.2	55.1	59.3	56.8	50.4	66	66.7	66.1	63.8	64.2	62.6	64.1	63.4	54.3
BdiCYP93G1	57	45.1	35.5	45.3	39.7	57.2	57.6	58.3	57.6	57.8	58	57.2	65.3	55.5	53.9	66	66	66.2	61.8	64.9	65.6	64.1	65.5	65.5	53.7	66.6	66.4	66.8	64.7	58.2	66	63.5	66.4	66	64.7	65.5	56.6	62	59.3	48.6	65.8	66	66.8	62.6	63	60.5	66.2	64.9	55.3
TurCYP93G1	25.7	31.1	31.3	30.9	33.7	26.9	26.3	26.7	26.3	26.3	26.6	26.2	29.4	40.2	27.6	30.5	29.7	29.7	28.4	27.8	28.6	28.4	28.7	28.3	34.1	29.1	29.3	30	28.7	29	30	29.6	28.8	29.5	28.8	29.4	31.4	29.2	30.6	40.4	29.6	29.6	29.6	28	28.2	29.3	29.7	27.7	32.4
PviCYP93G7	57.7	47.2	35.7	46.8	41.3	58.7	59.6	58.7	58.7	58.9	58.9	58.5	65.7	55.9	54.6	67.8	66.7	64.9	63	63.4	63.7	62.8	64.6	66.5	54.4	66.2	66.5	67.1	66.3	59.5	66.5	64.7	66.7	66.3	66.1	66.5	57.5	60.6	58.5	48.3	66.3	66.7	67.1	63.9	64.5	63.7	66.8	65.5	55.2
ZmaCYP93G7	59.8	47.6	37.1	46.8	42	60.2	59.2	59	58.4	58.4	59	59.6	66.3	56.1	54.7	67.7	66.7	64.6	61.5	63.2	65.4	63.7	65.4	66.3	53.4	65.4	65.2	66	64.8	59.2	66.2	65	67.1	65.6	66.9	66.7	55.7	60.2	58	48	65	65.4	65	62.1	62.5	61.5	67.9	65.2	55.3
ZmaCYP93G10P	27.3	33.8	44.4	33.8	40.4	26.3	26.1	25.9	26.7	26.5	26.6	27.4	29.1	22.5	32.5	29.9	29.9	28.5	29.8	29.2	28.8	27.9	28.7	29.5	26.3	29.9	29.7	29.8	29.2	29.7	29.2	27.9	29.6	28.8	29.8	29.2	30.9	31.7	31	24.5	29.2	29.6	29.8	29.2	29.2	28.7	29.9	29.1	35.2
SbiCYP93G7	58.2	46.8	36.3	46.3	41.1	58.7	57.8	57.8	57.2	57.4	57.6	58.5	64.5	56	53.7	66	65.6	64.3	60.7	62.2	65.5	64.3	65.3	64.3	54.1	64.7	65.3	65.6	64.3	60.1	64.9	63.9	65.1	64.3	66.6	65.5	55.7	60.3	58.2	48	65.1	65.6	65.6	63	63.1	61	66.8	64.1	54.9
ZmaCYP93G6	52.7	55.3	44.5	54.6	50.6	52.3	52.5	51.6	52.9	52.7	52.6	52.8	59.5	54.9	54	58.3	57.8	57.3	57.2	55.4	56.6	56.1	56	57	55.5	57.9	57.8	58.4	56.9	58.2	57.9	57.1	58.1	56.9	58.7	56.9	57.1	59.7	59.7	46.3	57.3	58.1	57.7	56.4	56.4	56.4	58.3	57	60.5
StiCYP93G7	58.2	46	35.8	45.6	40.4	59	58.6	58	58.2	58.4	58.4	57.3	66.5	56.7	54.2	67.5	66.9	66.2	62.3	64	65.6	64.5	65.8	65.6	54.5	67.3	66.7	67.1	66.2	60	66.9	64.8	65.8	65.6	67.3	66.9	56.3	61.1	59	49.3	66.5	67.1	66.9	63.8	64.4	63.1	67.9	66	55.5
ZmaCYP93G11	54.9	47.5	35.4	47.3	41	54.1	54.7	55.3	54.5	54.1	54.6	54.8	58.7	66.7	53.8	60.5	59.8	58.5	55.4	56	56.9	56.7	56.7	58.7	60.8	57.3	57.4	57.8	57.9	59.5	58.7	59.3	58.9	58.5	61.7	59.3	56.8	54.6	54.6	57.2	57.5	57.9	58.7	57.3	57.7	57.6	60.4	56.8	55.6
StiCYP93G11	58.3	47.2	38	47.2	42.1	60.4	59.6	58.9	58.7	58.5	58.9	58.9	62.6	54.6	53.8	67.6	66.5	65.9	61.8	64.5	63.9	62.8	63.7	66.1	53.6	65.4	64.9	65.4	64.5	56.9	66.5	65.3	65.5	65.7	67.3	66.9	55	59.8	57.5	48.9	65.5	65.9	65.7	64.5	65.1	62.2	66.4	64.5	55.2
OsaCYP93G1	61.2	48.1	37.4	48.1	43.4	62	61.6	62.1	61.4	61.4	61.8	61.4	68.6	58.8	54.5	69.4	68.9	68.7	64.2	65.6	65.4	63.7	65.4	66.7	56.4	67.2	66.7	67.3	67.1	61.8	67.8	67	68	68.1	68.3	68.3	58.4	64.2	62	51.3	68.4	68.8	68.8	66.5	66.9	65	68.3	66.7	57
PviCYP93F10	37.6	33.1	35.1	31.1	34	38.8	38.2	38.5	38.5	38.9	38	39.1	38.5	52.1	39.4	44.8	42.6	41.3	40.6	41.9	40.3	40.8	41.5	42.2	47.9	40	39.9	41.1	41.9	42	41.3	41.5	40.9	43.1	43.3	42.7	42.4	36	37.7	56.4	41.5	41.9	41.5	41.7	41.9	41.8	41.6	42.1	37.7
PviCYP93F13	27.5	34.1	43.8	33.8	39.8	26.7	27.1	27.3	27.7	27.5	27.6	27.6	28.5	25.2	36	33.2	31.7	30.5	30.6	31.1	30.5	29.6	30	30.8	29.1	31.5	31	31.1	31	29	31.2	30.6	32	31.9	31.3	32.3	30.2	32.1	30.6	27.7	30.2	31.2	30.8	30.7	30.7	29.3	31.5	30.8	36.1
SitCYP93F9	63.5	51.2	37.7	50.6	44	63.8	63.7	63.3	63.1	63.7	62.9	64.8	64.6	54.8	61.7	75.6	72.3	71.7	66.7	71.9	70.8	71	71.5	71.9	61.3	70.6	69.8	69.4	72.1	63.7	70.8	70.2	71.5	74	71.9	73.7	58.5	63.8	61.3	53.5	71	72.3	71.5	70	70.2	68.8	71.7	72.1	61
ZmaCYP93F6	62	49.3	36.9	48.9	42.6	63.3	64.1	63.3	62.5	62.3	62.5	64.4	64.6	53.2	60.8	75	71.5	70.2	64.8	70.4	70.7	71	70.2	71.3	60.2	70.7	70.2	70.7	69.6	62.1	70.9	69.8	72.1	72.8	70.7	72.5	58.9	63.9	61.2	53.3	70.9	72.1	71.9	68.6	68.8	67.7	70.4	71.7	60.8
SbiCYP93F7	62.2	50.8	37.2	49.6	43.3	63.2	64.1	64.1	63.7	63.5	62.8	65.3	65.3	53.2	60.3	73.5	71.9	70.8	65.6	71.4	68.7	69.5	69.5	71.4	60.1	70	70.8	69.5	70.6	63.4	70	70	70.6	72.9	71.4	71.9	59.2	63.9	61.5	52.9	71.2	71.4	71.9	69.7	70	67	71	71.8	61.5
SbiCYP93F8	61	49.8	36.1	49.2	42.2	63.5	63.7	62.5	62.2	62	61.8	64.3	65.2	55.3	60.1	75.3	71.5	70.7	66.2	70.9	69.8	70.7	69	71.5	60.8	70.5	70.3	70.5	70.2	62.5	70.9	70.2	70.9	73.2	70.7	73.2	58.7	64.6	61.8	53.6	71.3	72.4	71.5	69.6	69.8	67.5	71.5	70.9	60.5
HvuCYP93F1	64.5	52.3	39.5	51.4	45.1	65	65.2	64.5	64.5	64.6	64.5	65.6	66.4	56.1	61.7	77.3	73	72.3	67.6	72.1	71.8	71.2	71.3	74.4	61.1	73.4	72.7	71.8	71.7	64.5	73.5	72.9	73.3	75	73.4	75	60.7	65.4	62.9	54.3	72.5	73.7	72.9	70.5	70.7	68.9	73.4	73.8	63.5
TurCYP93F11	31.3	36.8	33.9	35.8	37.2	32.3	32.5	31.8	31.3	30.9	31.2	32.1	31.4	42.2	31.6	36.3	35.8	34.8	34.5	34.2	33.4	33	33.3	33.9	40	32.8	33.1	32.7	33.9	34.8	34.1	34.6	34.1	36.2	34.5	34.2	34.7	33.7	35.1	47.1	33.7	34.3	33.9	33.3	33.5	32.9	34	32.9	37
TurCYP93F12	33.7	36.8	34.8	35.5	35.5	33.9	33.7	33.6	33.5	33.5	32.8	34.1	34	46.2	28.5	38.3	37	37	36.5	36.6	34.4	34.5	36	36.4	40.8	35.3	35.5	35.2	36.6	36.6	36.8	37	36.1	38.7	37.7	36.8	37	35.6	37	50.3	36.1	36.8	36.5	36.6	36.8	35.5	35.5	36.6	39.1
TurCYP93F1	39	32.1	36.4	32.1	34.6	40.2	40.2	39.3	39.7	39.7	38.6	40.1	38.5	54.1	40.8	45.6	44.6	44.1	41.4	43.8	42.5	42.7	43.1	43.8	48.1	40.8	40.7	40.9	41.7	43.1	42.5	43.1	42.1	44.6	44.4	44	43.1	37.8	39.4	57.7	42.5	42.7	42.3	41.3	41.5	42.2	43.1	44	39.6
BdiCYP93F1	64.2	51.5	38.6	50.7	44.2	64.8	65.2	64.8	64.2	64	64	66.3	67.5	54.8	62.2	76.9	74	73.2	66.7	72	71.2	71.2	70.6	72.7	62.4	72.6	71.1	71.6	71.7	65.2	72.5	72.4	71.7	74.4	73.2	73.4	60.3	65.9	62.6	55.2	73.1	74.1	73.7	70.8	71.2	68.5	72.6	73.6	62
OsaCYP93F1	61.1	48.4	36.2	48.4	41.6	61.7	63.6	62.4	61.5	61.7	61.3	63.6	63.6	53.4	59.9	73.2	70.1	69.4	64.5	69	70.7	69.7	70	72.1	60.1	70.7	70.9	70.1	70.1	63.2	71.1	70.3	70.9	73	72.1	73.4	58.8	64.2	61.5	54.1	71.3	72.6	71.3	69.4	69.7	68.4	70.7	72.3	60.1
AcoCYP93K4	63.8	51.3	38.6	50.4	42.2	62.9	63.4	64.2	62.9	62.9	62.9	63.8	60.8	51.7	56.4	68.2	68.9	68.6	61.6	66.5	69.1	68.2	69.1	69.1	58.7	69.1	68.8	68.9	68.9	62.9	70.3	69.5	71.2	70.6	69.7	70.6	57.4	63.8	60.2	50.8	69.5	69.1	68.8	68.2	68.2	66.1	69.1	69.9	59.1
Note: the gray background indicates the identity;the white background is the similarity.
[truncated: 165 more columns]
