# Supplementary material
Source: publisher figshare collection journal article supplement (https://plos.figshare.com/articles/dataset/_/4045491)
Supplement: Supplementary file 1 [file 1 › S5 Table.XLSX]

## Sheet: Sheet1
S5 Table. The selection analysis of different branches of CYP93 gene famly.
Site	Domain	A branch			BC branch			B(FNSII) branch			B(F2H) branch			C branch			D branch			E branch			F branch			G branch			H branch			J branch
		dS	dN	dN/dS	dS	dN	dN/dS	dS	dN	dN/dS	dS	dN	dN/dS	dS	dN	dN/dS	dS	dN	dN/dS	dS	dN	dN/dS	dS	dN	dN/dS	dS	dN	dN/dS	dS	dN	dN/dS	dS	dN	dN/dS
1		34.5588	10.3232	0.298715	0	nan		0	nan		0	nan		0	nan		0	nan		0	nan		0	nan		0	0		0	nan		3.79951	1.64333	0.432511
2		55.8435	9.0285	0.161675	24.6425	6.63229	0.26914	5.42159	5.44697	1.00468	0	0	0.75678	0	nan		0	0		0	0		4.52614	6.20151	1.37015	8.23591	6.25902	0.759967	0	0		0.659622	1.63805	2.48331
3		28.3431	21.6924	0.765348	22.7979	12.7835	0.56073	5.89616	7.63257	1.2945	6.8529	5.18614	2.12288	0	nan		0	0		1.74531	0	0	7.4246	3.67884	0.495494	7.76064	8.56538	1.1037	0	0		0.602791	1.23691	2.05197
4		14.445	16.7452	1.15924	16.4718	18.8087	1.14187	6.2653	6.54731	1.04501	3.42628	7.27359	0.720684	0	nan		0	1.08374		0	0.517818		5.91673	5.42344	0.916629	8.18813	8.51816	1.04031	0	0		0.324657	1.98681	6.11971
5		37.2058	21.6924	0.583039	17.8071	12.6409	0.709884	15.6685	6.15275	0.392683	5.37664	3.87486	1.10877	0	nan		0	0		1.5389	0.580639	0.377308	7.71264	4.94663	0.641367	6.96119	7.42537	1.06668	0	0		0	0.988892
6		21.2548	26.0261	1.22448	13.3864	18.764	1.40172	5.85533	9.18496	1.56865	2.79691	3.10114	0.674531	0	0		1.01323	2.25468	2.22524	0	0.616565		3.91171	6.26846	1.60249	7.2186	8.39172	1.16251	0	0		0	0.985022
7		35.8842	22.8617	0.637096	16.3539	17.9099	1.09515	5.39863	10.8623	2.01205	5.13292	3.46231	0.688795	0	0		0	0		1.31255	0.621049	0.473164	5.43334	3.62182	0.666592	8.43786	8.55042	1.01334	0	0		1.15046	0.938624	0.815872
8	transmembrane domain	38.3243	17.2863	0.451052	18.3083	15.2284	0.831774	6.78532	10.463	1.54201	7.57512	5.21771	1.3673	0	0.427451	1.1549	0	0		0	0		3.1519	4.36628	1.38529	6.9435	8.03138	1.15668	0	0		0	0.5
9		22.6511	20.2238	0.89284	17.2534	19.3778	1.12313	6.34754	8.12094	1.27938	5.14811	7.03903	0.706226	2.84062	3.28062	0.998957	0	0		2.48861	0.637595	0.256205	4.56254	4.54721	0.99664	8.71988	6.00324	0.688454	0	0		0	0.956374
10		36.8945	24.0914	0.652981	29.2974	15.6925	0.535628	12.0559	5.10736	0.42364	11.0161	7.77988	2.46378	3.2806	3.27718	1.02811	1.69907	1.01605	0.598001	2.42508	0.64627	0.266494	4.40172	3.2932	0.748161	6.89543	6.9521	1.00822	0	0.927353		0	1.43456
11		28.7508	19.2424	0.669282	16.3031	19.3344	1.18594	9.32696	6.27927	0.673239	2.70248	6.65832	0.961496	3.71879	3.82331	1.30409	0	0.57944		4.86444	0	0	4.121	4.36382	1.05892	6.68229	5.39488	0.80734	1.7535	1.07833	0.614962	0.953022	0	0
12		19.9483	16.2929	0.81676	18.8849	18.6489	0.987503	8.87162	8.35957	0.942282	5.15381	4.95537	1.24687	3.30724	4.31295	0.829157	2.67732	1.105	0.412727	0	0		3.78415	5.13684	1.35746	10.4545	4.15064	0.39702	0	0.57433		1.03136	1.05284	1.02082
13		28.3797	16.733	0.58961	19.7418	17.1644	0.869448	9.20657	7.11356	0.772662	5.52153	6.88463	1.12822	3.28413	2.72306	2.90325	2.73553	0	0	0	nan		3.71292	1.71023	0.460616	4.04428	5.05137	1.24901	1.03213	0.779103	0.754847	0	0.483517
14		30.8119	16.5705	0.537796	18.5183	17.5254	0.946381	8.13049	6.66091	0.819251	5.08705	5.73934	0.548746	1.76628	5.12795	1.52393	0	0.586632		1.80234	1.11765	0.620109	4.12773	1.63457	0.395997	4.36278	6.0067	1.3768	1.39575	0.550851	0.394665	1.00124	1.51511	1.51324
15		33.5865	21.6796	0.645486	18.4475	15.7911	0.856003	8.94858	5.20293	0.581426	7.37827	4.0488	0.537435	3.77377	5.75096	0.525463	1.51877	0.814271	0.536138	1.68214	0	0	3.47908	1.76487	0.507281	6.58592	3.81881	0.579844	0.715731	0.903408	1.26222	0	0.448087
16		25.062	17.6454	0.704068	24.7521	13.9391	0.563147	12.0233	6.09476	0.506912	9.49115	5.10088	0.910954	3.33053	1.75007	1.47002	1.85928	0	0	0	0		2.25532	1.79068	0.79398	5.91789	5.25252	0.887567	0	0		0	0.978668
17		19.2226	10.2334	0.532363	15.0172	14.6564	0.975974	7.68256	5.42697	0.706401	4.78391	4.35793	1.3845	2.40832	3.54028	0.647495	0	0		0	0		0	1.69274		4.73044	4.19972	0.887807	1.62265	0.592456	0.365117	1.0949	0.958464	0.875392
18		25.3663	17.0052	0.670388	22.9281	16.182	0.705771	8.77238	6.39457	0.728944	3.78017	5.23366	1.13057	6.12778	3.96771	0.901899	1.17326	0	0	4.27378	0.525186	0.122886	4.68359	1.75635	0.375	6.83173	5.9228	0.866955	1.18208	0.593166	0.5018	2	1	0.5
19		17.5798	10.5713	0.601329	23.9415	18.1825	0.759456	11.4203	5.34354	0.467897	6.09958	6.89602	0.839019	4.67103	4.21279	0.999648	1.38274	0	0	2.52945	0	0	0	1.75635		7.23637	7.82403	1.08121	1.16195	1.26577	1.08935	0.587163	1.21781	2.07405
20		25.1695	20.9131	0.830887	21.7376	18.0861	0.832018	11.3056	6.85	0.605893	6.66569	5.59264	0.798466	4.33447	4.33295	0.436953	0	1.09846		2.68352	1.22943	0.458141	0	2.34179		5.44842	3.81719	0.700605	1.37145	1.10946	0.808969	1.14187	0.470756	0.412269
21		33.1867	16.3322	0.492129	26.1402	17.0534	0.652383	8.80023	6.41396	0.72884	8.39221	6.70089	0.545057	6.21644	2.71629	0.435645	0	0.586632		0	0.584248		1.16923	2.92933	2.50535	3.39995	3.21003	0.944141	1.82407	0.504131	0.276377	1	0	0
22		21.9337	18.0335	0.822181	23.9723	13.2169	0.551339	8.51999	4.8489	0.56912	7.48452	4.07949	0.471959	7.85981	3.42408	0.911176	0	0		2.32352	1.46615	0.631002	1.21076	2.87984	2.37855	5.08445	6.71503	1.3207	0	0.539872		0	0.926513
23		29.9713	16.4099	0.54752	23.6226	16.6715	0.705744	10.9212	4.95777	0.453959	12.7188	6.00276	1.13522	4.86871	4.43625	0.843924	0	nan		0	nan		3.08338	2.31254	0.75	1.57135	4.71404	3	0.9659	1.37412	1.42263	0	0
24		31.0832	14.6269	0.470572	21.7683	19.52	0.896718	10.8003	10.8263	1.0024	4.13823	4.6978	0.826781	5.56371	4.69535	0.603471	0	0		4.72271	0	0	1.21025	2.30433	1.90402	8.73024	4.23875	0.485525	1.36274	1.1663	0.855846	2.71397	1.33714	0.492687
25		19.8823	24.2288	1.21861	23.822	20.0713	0.842553	10.3237	9.75726	0.945128	6.42624	5.31309	0.882571	5.86315	3.53824	0.959652	0	0		2.92901	1.20115	0.410089	6.65923	3.46562	0.520423	5.74306	7.81531	1.36083	2.41034	0.96813	0.401657	0	0.938624
26		20.8952	27.0822	1.2961	25.2638	20.1322	0.79688	10.2264	8.80428	0.860934	6.90193	6.09145	0.432342	4.82795	4.63316	0.365743	1.17326	0.586632	0.5	2.52945	0	0	6.48394	5.16017	0.795839	8.98859	7.77032	0.864465	0.987595	1.46863	1.48708	0	0.863756
27		33.9013	8.83981	0.260752	29.2338	11.8772	0.406284	9.78507	4.88595	0.499327	7.35319	3.17909	0.896595	8.78561	3.21327	1.04372	3.24941	0	0	1.51821	0.583641	0.384428	4.5192	2.98147	0.659734	9.11309	7.02918	0.771328	2.14507	0.933212	0.43505	0	0.401744
28		30.7391	17.9466	0.583838	23.3646	23.3397	0.998936	6.63531	11.9525	1.80134	5.72249	5.13076	1.37232	4.89836	5.1125	0.672668	2.53302	2.26321	0.893484	0	0.537171		4.00808	4.53859	1.13236	5.50156	8.12504	1.47686	0	1.44632		0	0.824481
29		36.4482	30.7748	0.844343	24.0725	20.2723	0.842134	9.27371	6.2988	0.67921	5.70742	7.83241	1.41173	6.43994	4.33194	1.69955	1.85541	1.5451	0.832759	4.45759	0	0	2.40687	4.04348	1.67997	7.15563	5.75197	0.803838	0.973462	1.58625	1.6295	0.737906	0.679834	0.921302
30		25.7288	19.675	0.764707	19.7996	23.4804	1.1859	10.7022	8.85451	0.827352	4.73184	6.68007	1.20373	3.46265	5.88496	0.872857	0	0		0	0.564034		3.72293	1.36953	0.367864	8.34698	6.81755	0.816768	1.73016	0.942777	0.544908	0.595048	1.63948	2.7552
31		28.4656	26.2575	0.922429	16.9023	22.1387	1.3098	5.93734	7.95282	1.33946	6.65205	8.00725	1.1995	4.30727	3.75963	0.920698	0	1.1579		3.79418	0.765678	0.201803	3.22716	2.17871	0.675116	5.5709	7.5966	1.36362	1.45121	0.971401	0.669375	1.72158	1.71323	0.995146
32		40.0004	24.7978	0.619938	27.9911	23.1298	0.826328	14.3102	10.017	0.699986	6.01322	7.21283	1.00215	7.55623	6.957	0.764782	1.17326	0	0	4.06567	1.33411	0.328141	5.58541	4.53845	0.812555	4.96771	5.64827	1.137	1.24089	0.97841	0.788477	1.54621	1.29152	0.835279
33		28.5954	27.6633	0.967403	23.3829	23.2292	0.993423	9.2162	9.27354	1.00622	7.09902	7.11426	1.27634	7.26517	5.55627	0	1.85453	0.495602	0.267239	1.71804	1.19507	0.695603	2.91586	2.88777	0.990367	4.28418	5.53334	1.29158	0	0.469117		1.85217	1.61646	0.872739
34		38.0224	22.8845	0.601868	19.7985	19.0604	0.96272	13.7145	9.5124	0.693601	5.12521	6.54151	1.14424	1.07682	0	0.444207	0	0.538957		3.68309	3.42127	0.928914	3.40133	2.12583	0.624998	5.76055	5.90313	1.02475	0	1.3673		2.06273	0.985022	0.477533
35		22.7293	32.498	1.42978	18.7	19.7606	1.05672	5.76921	8.46143	1.46665	6.79718	7.77758	0.948436	5.18093	2.30141	0.235567	1.53757	0.796042	0.517728	0	1.13723		4.52525	3.73294	0.824913	5.39571	5.36387	0.994098	1.14855	1.42716	1.24257	1	0.5	0.5
36		30.1316	20.5961	0.68354	21.6851	14.3208	0.660401	10.1177	6.87784	0.679785	5.2876	5.01496		7.53066	1.77397	0	3.51979	1.18542	0.336786	0	nan		2.21	1.6124	0.729594	4.62693	1.45629	0.314742	0	1.41757		0.7674	1.07901	1.40606
37	Proline-rich membrane hinge	0	7.54945		11.2778	8.8347	0.783369	9.39854	4.78368	0.508981	0	4.85181	0.939608	1.29632	0	0	0	nan		0	nan		0	0		18.0844	2.00356	0.110789	1.18111	0.464396	0.393187	0	0
38		0	0		19.4556	8.80279	0.452455	6.33786	5.10974	0.806224	4.19955	3.94593	0.50025	3.88896	0	0	0	nan		0	nan		0	3.92588		4.54468	2.99069	0.658062	1.18963	1.03172	0.867263	0	0
39		25.2027	8.12684	0.32246	12.2744	8.548	0.696406	4.90071	5.41563	1.10507	4.15969	2.08088	0	4.36967	0	0	2.34653	0	0	3.01992	0	0	1.10065	0.538501	0.489257	5.9211	0	0	1	0	0	1.06664	0.484853	0.45456
40		21.617	0.547663	0.0253349	10.7574	0	0	5.50319	0	0	1.03465	0	0	4.30727	0	0	0	0		3.79418	0	0	4.33909	0	0	2.18062	0	0	1	0	0	1	0	0
41		29.4424	0.545229	0.0185185	11.8332	0	0	5.50319	0	0	3.10396	0	0.472167	2.15364	0	0	0	0		1.26473	0	0	3.25431	0.542386	0.166667	3.27094	0	0	0	0		0.913614	0.524811	0.574434
42		38.6479	8.15198	0.21093	18.065	4.25131	0.235333	6.94207	2.66836	0.384375	4.69088	2.21488	0	5.46425	0	0	1.85453	0	0	2.52945	0	0	0	0.390143		8.42634	1.6731	0.198556	0	0.436578		2.28373	0.470756	0.206134
43		23.9151	0	0	17.2119	0	0	9.90574	0	0	4.13861	0	0.561432	3.23045	0	0	0	0		2.52945	0	0	4.68359	0	0	4.36125	0	0	1	0	0	1	0	0
44		0	nan		14.5514	5.76996	0.396524	0	0		6.21273	3.48802	0.67975	4.05402	0	0	0	nan		1.26473	0	0	0	nan		0	nan		0	nan		0	nan
45		34.7167	22.8646	0.658605	15.3792	11.5932	0.753825	10.6993	6.03614	0.564161	5.30201	3.60404	0.447264	3.23045	0	0	0	0.576139		1.54053	0	0	3.45561	2.07135	0.599417	2.94724	2.45256	0.832156	1.9175	0	0	1	0.5	0.5
46		20.9445	12.0865	0.577072	12.2259	4.68007	0.3828	6.60383	2.20128	0.333333	5.00897	2.24033	0	2.11998	0		0	0		2.52945	0	0	4.47236	1.60327	0.358484	4.46658	2.88482	0.645869	0	0.462228		1	1.06996	1.06996
47		35.5975	3.07859	0.0864833	13.7821	2.47744	0.179758	5.55788	1.88666	0.339458	4.85516	0	0	0	0	0	0	0		1.00567	1.34922	1.34161	1.84888	0.593887	0.321215	3.20701	0	0	0	0.640757		0.64211	0.675275	1.05165
48		34.3367	0.536689	0.0156302	17.3277	0	0	9.90574	0	0	2.1132	0	0.344009	4.30727	0	0.239887	2.34653	0	0	2.52945	0	0	1.08477	0	0	3.27094	0	0	0	0		1	0	0
49		19.2753	4.95721	0.257179	9.68134	4.05006	0.418337	4.75569	2.38678	0.50188	2.06401	0.710039	0.145755	1.85522	0.445044	0.209591	0	0		2.43217	1.3486	0.554481	0	1.85634		3.36413	1.61312	0.479507	1.38543	0.438942	0.316827	0	0
50		32.5129	3.89482	0.119793	16.9564	2.70544	0.159553	5.56083	0.996823	0.179258	4.85727	0.707972	0.332059	4.8609	1.0188	0	1.36397	0	0	2.82604	1.56003	0.552019	3.05077	0	0	0	0.858394		0	0		0	0
51		24.6829	0	0	16.2639	1.09356	0.0672384	7.70447	0	0	3.18304	1.05696	0	4.30727	0	0	0	0		2.52945	0	0	0	0		4.36125	0	0	0	0		0	0
52		29.5692	0.437607	0.0147994	21.6254	0	0	11.5194	0	0	2.14375	0	1.53438	3.72572	0		0	0		4.39566	0.521632	0.11867	6.06816	0	0	0	0		0	0		0	0
53		22.2693	6.55838	0.294503	5.68229	1.78395	0.313949	3.30191	0	0	1.00023	1.53473	0.0650269	0	0	0.118083	0	0		2.52945	0	0	1.20333	0.577663	0.480053	3.10244	0	0	0	0		0.93812	0	0
54		27.8962	1.32114	0.047359	23.5705	0.88598	0.0375885	7.48391	0	0	6.49075	0.422073	1.01035	3.7719	0.445397	0	0	0		3.79418	0	0	0	0.423011		0	0		1.89025	0	0	0	0
55		25.4787	2.17569	0.0853925	7.51221	2.17697	0.289792	4.37839	1.10475	0.252318	1.04939	1.06024	0	1.07682	0	0.150588	2.26341	0	0	0	0		2.1478	0	0	1.94924	0	0	0	0		0	0
56		24.115	7.11941	0.295227	18.3813	1.14827	0.0624698	7.73179	0.549349	0.0710507	3.97882	0		4.60318	0.693184	0.359783	0	0		1.26473	0	0	6.25991	0	0	1.40711	0.489997	0.348231	0	0		0	0
57		0	nan		19.6897	6.97315	0.354152	0	nan		0	nan	0.453827	3.83365	1.37928	1.18999	0	nan		0	nan		0	nan		0	nan		0	nan		0	nan
58		28.6327	18.3942	0.642419	13.042	10.2633	0.786947	5.46559	4.29013	0.784934	5.04795	2.2909	0	1.93023	2.29694	0.382382	0	0		3.43487	0	0	1.2353	1.71173	1.38568	4.81609	0	0	0	0		1.09477	0.479257	0.43777
59		29.5509	7.65255	0.258961	16.5635	2.14344	0.129408	6.60383	0.551089	0.0834499	5.17327	0	0.5	4.07604	1.5586	0	0	0		2.52945	0.775565	0.306614	1.1709	0	0	3.27094	1.09241	0.333975	0	0		1.09764	0.478709	0.436127
60		33.818	8.84293	0.261486	8.3808	3.85007	0.459392	5.62342	3.95412	0.703153	1.03465	0.517327	1.26538	1.07682	0	0	0	0		2.20404	0.682766	0.309779	2.14694	0	0	3.27094	0	0	0	0		2	0	0
61		22.5609	2.14866	0.0952381	13.3514	4.58041	0.343065	5.24586	2.54688	0.485503	1.16255	1.47106		3.19902	0		0	0		1.26473	0	0	2.34179	0	0	3.26517	1.63691	0.501326	0	0		0	0.5
62		12.0143	0.436103	0.0362987	5.90814	0	0	3.83403	0	0	0	0	0.408673	0	0	0.619609	0	0		2.31116	0	0	0	0		0	0		1.79379	0	0	0	0
63		16.6051	4.15725	0.250359	11.6257	8.29388	0.713408	5.50984	3.44538	0.625314	3.89871	1.5933	0.302478	3.80839	2.35971	0.375747	0	0		0	0.643071		0	0		2.1998	0	0	2.31177	0	0	1.69424	0	0
64		27.1837	10.4981	0.38619	18.3411	6.49864	0.354321	7.7524	3.32694	0.429149	5.17327	1.5648		4.30727	1.61845	0	0	0		0	0.645821		0	0		3.27094	1.09031	0.333333	1	0	0	1	0.5	0.5
65		25.2177	7.85144	0.311347	13.7298	1.35987	0.0990447	9.33031	0.456662	0.0489439	0	0.413819	0.600228	1.07682	0	0.12605	1.17326	0	0	3.22834	0	0	2.00519	0	0	0	0.392502		1.83467	0	0	1.00222	0.499446	0.498339
66		16.7126	6.44971	0.385919	12.3177	4.80305	0.389932	5.03374	2.13628	0.424392	2.13737	1.28291	0.78163	3.92442	0.494672	2.36856	0	0		0	0		0	0.420147		0	1.21174		1.9357	0	0	0	0.401744
67		23.0832	7.17146	0.310679	7.23052	9.62621	1.33133	1.96064	2.78211	1.41898	3.37212	2.63575	0	1.62006	3.83721	0	3.6613	0	0	2.40787	0.555674	0.230774	2.21606	0	0	0.799443	1.22355	1.5305	1.83467	0	0	0.533088	1.22302	2.29423
68		29.1237	3.34348	0.114803	16.4	3.78056	0.230521	6.17823	3.14944	0.509764	1.0219	0	0	6.9882	0	0.344615	0	0		2.47521	0	0	2.00941	0	0	1.31697	0.501961	0.381149	1.94355	0.524128	0.269676	0.953022	0	0
69		27.9325	3.8055	0.136239	18.7769	5.46768	0.291192	8.10884	3.41833	0.421555	4.13861	0	0.938202	3.23606	1.1152	0.221778	0	0		2.52945	0	0	4.68359	0	0	5.00202	3.04056	0.607866	1.79272	0	0	2	0.5	0.25
70		27.0421	24.1824	0.894251	15.1795	12.4745	0.821799	8.77106	4.87217	0.555482	2.53709	2.3803	0.712762	6.47525	1.43607	0.460309	0	1.07256		4.33309	2.0705	0.477835	3.78787	2.43647	0.643231	4.47606	4.86868	1.08772	1.16638	0.960841	0.823784	0	0.967034
71		17.875	14.7124	0.823071	15.3863	8.26981	0.537478	4.26061	2.99206	0.702261	4.26731	3.04158	0.307596	4.72771	2.17621	0.609574	0	1.13627		3.21867	1.6134	0.501263	1.15818	0	0	4.55576	1.42142	0.312005	1.03541	0.491593	0.474779	0	0
72		27.5675	12.3409	0.447659	10.7227	5.13182	0.478593	3.66368	1.63588	0.446513	5.81447	1.78851	0	1.71678	1.0465	0	1.85592	0	0	0	0.619341		0	0		5.41087	3.05537	0.564672	0	0		0	0.478187
73		21.4866	0	0	18.2876	0	0	8.80511	0	0	5.17327	0	0	5.38409	0	0	0	0		3.79418	0	0	1.1709	0	0	5.45156	0	0	0	0		0	0
74		27.5164	1.58749	0.0576923	17.2119	0.537871	0.03125	9.90574	0.550319	0.0555556	5.17327	0	0.717523	1.07682	0	0	2.34653	0	0	1.26473	0	0	0	0		4.36125	0	0	1	0	0	1	0	0
75		24.3837	11.8271	0.485038	16.0386	6.60073	0.411552	9.03147	3.29937	0.365319	2.7588	1.9795	0.351162	2.73254	0	0.261174	0	0		1.07486	0	0	0	0		1.01239	0	0	0	0.526072		0	0.4837
76		25.554	11.5224	0.450906	15.1358	6.38026	0.421533	11.4913	3.64383	0.317096	3.64812	1.28108	0.602191	1.89784	0.495665		0	0.397408		0	0.962774		4.39219	0	0	6.05506	0.6126	0.101172	1.18859	0	0	1.37639	0.879715	0.639145
77		35.9131	10.334	0.287751	11.586	9.05307	0.781381	8.14113	5.89373	0.723946	3.37815	2.03429	0	0	1.07682	0.249538	0	0		4.00461	1.2934	0.322977	0	0.532975		0	0.42699		0	0		0	1.19367
78		21.4832	12.2726	0.571264	12.2619	2.09336	0.170721	5.01127	1.56114	0.311526	4.09826	0	0.478308	2.1563	0.538077	0.145587	0	0		3.22576	1.27267	0.394533	1.1709	0	0	3.00277	0.910994	0.303385	1	0.5	0.5	0	0
79		31.0373	16.6508	0.536476	13.1162	6.6537	0.507291	6.83704	3.55281	0.519642	3.19948	1.53034	0.089358	3.6982	0.538409	0	0	0		6.24774	1.83109	0.293081	3.46238	0	0	1.53713	0.796609	0.518243	1	0	0	0	0.5
80		32.8618	6.3401	0.192933	17.4673	1.96977	0.112769	7.42333	1.51788	0.204474	5.58401	0.498975	0	1.71375	0	0	0	0		2.3162	1.06615	0.460303	3.3957	0	0	4.08406	0	0	0	0		0.913614	0	0
81		28.4864	0	0	13.4974	0	0	7.19321	0	0	2.06931	0		2.15364	0		0	0		3.28541	0	0	0	0		6.2905	0	0	0	0		0	0
82		0	nan		0	nan		0	nan		0	nan	0	0	nan	0	0	nan		0	nan		0	nan		2.20764	0	0	0	nan		0	nan
83		30.5965	0	0	16.9339	1.55892	0.0920593	6.41797	1.53355	0.238946	4.13861	0		3.23045	0		1.17326	0	0	2.52945	0	0	0	0		1.04842	0	0	1	0	0	0	0
84		26.6857	11.3458	0.425165	8.78741	5.2998	0.603112	7.02478	3.8341	0.545796	0	1.03465	0.47039	0	0	0	2.82128	0	0	4.45083	0.578506	0.129977	2.51648	1.13162	0.449683	3.14525	0	0	1	0	0	1	0	0
85		23.3376	4.71243	0.201925	15.1933	8.51292	0.560306	6.24908	7.23966	1.15852	3.29666	1.55071	0	3.23045	0	0	0	0		4.39566	0.521632	0.11867	3.51269	0	0	0	0.375386		0	0.925412		1.10039	0.478187	0.434561
86		22.1583	5.08989	0.229706	15.8538	4.30403	0.271482	7.81398	3.27567	0.419206	2.14072	0	0.558799	2.15364	0	0.330772	0	0		3.79418	0	0	0	1.04972		5.02456	0	0	0	0		0	0.984569
87		34.1731	9.91114	0.290028	17.3774	6.25789	0.360117	8.70596	2.18665	0.251167	5.42756	3.03291	0	3.24713	1.07406		1.17326	0.586632	0.5	3.95818	0.619528	0.156519	0	1.44152		3.12905	0.525569	0.167965	1.5026	0	0	0	0.444032
88		28.0733	8.7211	0.310655	13.5074	0.518939	0.0384188	7.20495	0.513383	0.0712541	6.20792	0	0.29479	0	0	0	1.42839	0	0	3.79418	0	0	1.1709	0	0	4.19367	0.524208	0.125	1.12287	0.474063	0.422188	2.09868	0.977031	0.465547
89		19.0775	8.95284	0.469288	15.6261	5.18266	0.331667	7.19321	3.59661	0.5	5.23422	1.543	0.383835	3.23045	0	0	0	0.586191		2.52945	0.632363	0.25	0	0		4.80049	2.46523	0.513536	1	0	0	0	0.5
90		21.7664	3.80405	0.174767	10.9221	3.0783	0.28184	4.52913	1.4875	0.328429	4.13861	1.58854	0.215711	2.15364	0	0.1	0	0		3.79418	0	0	0	0		0	0.45311		0	0		1.04558	1.00532	0.961492
91		34.1392	9.28694	0.272032	21.4109	6.3706	0.29754	7.63387	3.49681	0.458065	8.27723	1.78549	0.25	5.38409	0.538409	0	2.34653	0	0	3.79418	0.71837	0.189335	1.1709	0	0	3.19391	2.12436	0.665128	0	0.465592		1	0	0
92		32.9694	7.96663	0.241637	16.6122	1.03826	0.0625	9.24841	0	0	4.13861	1.03465		2.15364	0	0.338157	2.34653	0.586632	0.25	2.52945	0.632363	0.25	1.1709	0	0	6.2905	0.524208	0.0833333	1	0.5	0.5	1	0.5	0.5
93		22.4563	4.64316	0.206764	8.7956	7.91877	0.90031	1.60372	2.92291	1.82258	0	2.9764	0.664268	4.09689	1.38539	0.17836	0	1.08271		2.33707	0	0	0	0.423709		0	1.54905		2.02144	0	0	0	0
94		43.1429	16.7956	0.389302	15.9979	5.23326	0.327121	7.12957	1.33871	0.187769	4.05064	2.69071	0.19815	3.67846	0.656092	0	0	0		3.54586	2.10929	0.594862	1.1709	0	0	5.24208	1.04842	0.2	0	0.953045		0	1.48834
95		32.4917	1.57298	0.0484117	20.0592	2.50992	0.125126	7.19321	0.513801	0.0714286	5.20547	1.03146	0.222285	3.72572	0	0	2.25884	0	0	2.52945	0	0	0	0		7.33892	0	0	0	0		2	1	0.5
96		27.4818	6.68051	0.243088	7.69925	3.26301	0.423809	3.53799	2.80409	0.792564	2.06298	0.458569	0.166762	2.19598	0	0	0	0		4.45083	0	0	0	0		2.74365	2.34467	0.854579	0	0		1.42311	0.793841	0.55782
97		22.8397	4.7833	0.20943	15.5357	3.09613	0.199291	7.37381	1.37791	0.186865	5.60623	0.934907	1.22762	1.07682	0	0	1.76724	0	0	2.20831	0	0	0	0		0	0.408304		0	0		1.69424	0	0
98		26.5185	7.28612	0.274756	8.29711	4.37674	0.527502	4.47444	1.77861	0.397505	1.75431	2.15362	0	1.89861	0	0	0	0		1.54869	0	0	0.607755	0.862347	1.41891	3.72658	1.45884	0.391469	0	0.990755		0	0
99		22.0808	2.09796	0.0950129	9.27616	1.56595	0.168815	4.07813	1.55297	0.380805	2.04205	0	0.440718	2.15364	0	0	0	0		2.50413	0.643337	0.25691	0	0		0	0.451298		1	0	0	0	0.926513
100		23.8518	2.59324	0.108723	19.8326	1.90277	0.0959414	12.5605	0	0	4.15092	1.82938	0.24578	2.17787	0	0	1.80397	0	0	4.58195	0	0	0	0		0	1.37018		1.11809	0.47492	0.42476	1.69424	0	0
101		30.7403	4.16909	0.135623	13.9551	3.06454	0.219601	7.10182	2.74772	0.386904	2.093	0.514416	0.0677884	3.23045	0	0.125604	0	0		2.52945	0	0	0	0		0	4.0485		1	0	0	0	0.478187
102		29.2636	5.62806	0.192323	24.4991	3.40328	0.138915	10.9423	2.12337	0.194051	6.12232	0.415022	0.121094	3.57558	0.449108	0	1.75488	0.481243	0.274232	3.9359	0.630746	0.160255	0	0		0	0		1.79379	0	0	0	0
103		21.3129	1.82415	0.0855893	12.8517	1.83665	0.142911	3.53745	1.3727	0.388047	3.76162	0.45551		4.05402	0	0.166667	1.76032	0	0	2.41525	0	0	0	0		5.11712	0.429292	0.0838934	1	0	0	0	0
104		0	nan		16.5795	2.76325	0.166667	0	nan		0	nan	0.329509	3.23045	0.538409		0	nan		0	nan		0	nan		0	nan		0	nan		0	nan
105		29.344	23.0294	0.784809	12.0124	8.0255	0.668103	7.77051	3.32869	0.428375	3.12798	1.0307	0.500809	0	2.69205		0	0		0	1.01422		1.1709	0	0	2.09683	2.09683	1	0.894062	1.06298	1.18893	1.92651	1.6066	0.833939
106		27.6195	17.4226	0.630808	12.8581	6.13722	0.477303	10.8366	4.00677	0.369745	2.06931	1.03633	0	0	0	0	0	0		3.41858	1.75177	0.512425	0	0		0	1.95618		0	0.5		1.15046	0.469312	0.407936
107		24.2091	1.9303	0.0797345	17.1203	0.431292	0.0251919	7.29265	0.437879	0.0600439	4.24883	0	0.986449	1.86746	0		1.78995	0	0	2.09515	0.929269	0.443533	0	0		2.37597	0	0	0	0		0	0.831467
108		32.1516	12.2679	0.381565	12.6626	6.32862	0.499788	6.16561	1.59374	0.258489	3.13712	3.09461	2.0156	0	0.442359	0	2.19706	0	0	1.87004	1.5844	0.847256	4.08392	0	0	2.09683	1.12058	0.534416	0	0		0	0.5
109	SRS1	28.6396	9.35944	0.3268	13.059	9.36149	0.716862	9.58149	5.7451	0.599604	1.21774	2.45448	0.13477	1.07682	0	0	0	0		4.13149	0.467463	0.113147	0	0		2.06962	0.894381	0.432147	0	0		0	0.38754
110		38.1166	5.31478	0.139435	18.0116	2.06383	0.114583	5.99685	0.52447	0.0874575	7.53229	1.01513	1.90596	2.58636	0	0	1.11493	0	0	2.97103	1.98945	0.669617	1.15413	0	0	1.7157	0	0	0	0		1	0	0
111		37.3699	4.70811	0.125987	14.6888	10.153	0.691205	9.98136	3.87675	0.388399	2.53713	4.83566		1.89861	0		1.12942	0	0	2.30924	1.13213	0.490262	2.34179	0.585449	0.25	3.14525	0	0	2	0.514086	0.257043	1	0	0
112		38.9953	29.2465	0.75	0	0		0	0		0	nan	0.425906	0	nan		0	nan		0	nan		0	nan		0	nan		0	nan		0	nan
113		20.4557	23.5055	1.14909	16.1336	9.52255	0.590229	6.42093	5.95513	0.927456	5.66538	2.41292	0.901618	0	0		0	0.561764		1.35515	1.95741	1.44442	0.867061	1.66311	1.9181	5.16248	2.11313	0.409324	0	0		0.267911	1.35314	5.05073
114		38.6849	21.8618	0.565124	8.29825	5.75626	0.693672	5.75837	3.33393	0.578971	2.61007	2.35328	0.69445	0	0	0	0	0.386009		0	0		5.41756	1.0854	0.200349	1.04842	0.525713	0.501435	0	0		0	1.38812
115		29.0209	21.127	0.727991	17.9186	8.07192	0.450478	10.6155	4.3686	0.411529	4.35932	3.02733	0	2.15364	0	0	0	0		3.13403	0	0	2.16954	2.16954	1	4.19367	1.57263	0.375	0	0		1	0.5	0.5
116		36.776	8.53354	0.232041	12.3078	0	0	4	0	0	5.17327	0	0.292344	2.15364	0	0	1.79081	0	0	2.52945	0	0	2.16954	0.542386	0.25	3.07449	0.530311	0.172487	0	0		1	0	0
117		26.0956	11.3707	0.435733	20.061	2.35027	0.117157	7.90067	0.688931	0.0871991	5.68101	1.66081	0.546882	5.70109	0	0.346879	0	0		4.39566	0	0	3.24676	0.543017	0.167249	2.09683	1.57263	0.75	1.33905	0.443813	0.33144	0	0.5
118		34.502	14.0839	0.408204	18.5214	8.50794	0.459357	7.64717	3.96204	0.518106	4.07775	2.23005		4.39631	1.52499	0	0	0		0	0		0	0.780286		4.72161	0.556928	0.117953	0	0.820228		1	0	0
119		20.3493	13.3243	0.654778	16.356	10.7219	0.655533	9.73151	6.25477	0.642734	0	3.74303	0.586148	3.20956	0	0.25195	0	0		4.25272	1.05165	0.247289	0	1.08477		1.17469	2.3712	2.01857	0	0		0	0.398057
120		28.4004	5.39964	0.190126	14.0302	4.17986	0.297919	4.6942	0.516834	0.110101	3.97661	2.33088		2.1451	0.540458	0	0	0		3.69061	0	0	3.02736	0.563508	0.186138	5.62032	0.429612	0.0764391	0	0		2.34489	0	0
121		29.0735	3.9754	0.136736	9.2445	2.56222	0.277162	6	1.5	0.25	0	0.515941	0	3.23045	0	0	0	0		2.52945	0	0	2.07834	1.68132	0.808973	3.14525	1.04842	0.333333	0	0		0	0
122		38.0711	0	0	18.7161	0	0	8.88716	0	0	2.14296	0	0.358914	5.20417	0	0.0785708	3.50839	0	0	4.39566	0	0	0	0		5.03142	0	0	0	0		0	0
123		25.0045	4.69135	0.187621	20.3597	5.90673	0.290118	8.8815	3.31238	0.372953	5.8656	2.10525		5.65106	0.444008		0	0		2.52945	0	0	0	0		0.80549	2.90986	3.61253	1.58646	0.844001	0.532002	0	0.398325
124		31.4419	9.48066	0.301529	13.1575	4.77591	0.36298	9.28985	1.06664	0.114818	0	0	0.377764	0	nan	0.465942	1.12942	0	0	3.79418	0	0	3.51269	0	0	5.83284	2.24718	0.385263	1	0	0	1	0.5	0.5
125		31.0053	13.5127	0.435818	13.3425	6.45496	0.483788	7.10323	2.49371	0.351068	4.13861	1.56342	0.169381	1.90267	0.886534	0	4.51769	0	0	2.52945	0.632363	0.25	1.22991	1.1401	0.926982	3.14525	0.524208	0.166667	1	0.5	0.5	1	0.5	0.5
126		25.4193	3.73418	0.146903	17.436	2.07357	0.118924	6	1.50222	0.25037	3.10396	0.525751	0.517383	4.30727	0	0	0	0		4.56705	0	0	0	0		2.09683	0	0	0	0.490878		1	0	0
127		35.0484	3.49777	0.0997983	17.8952	3.64659	0.203775	11.5969	0.834588	0.0719664	4.73931	2.45204	0.334714	3.23045	0	0	1.78988	0	0	2.31116	0	0	0	0		0	0		0	0		0	0
128		33.3093	19.2749	0.578664	13.3334	1.54028	0.115521	8	0.5	0.0625	3.10396	1.03894	0	2.15364	0		0	0		4.56705	0	0	0	1.04534		3.14525	0.524208	0.166667	1	0.5	0.5	1	0	0
129		27.9321	5.97021	0.21374	19.8946	1.23996	0.0623262	14.5537	0.420315	0.0288803	3.86949	0	0.499306	0	0	0	0	0		0	0		0	0		0	0		0	0		2.3287	0	0
130		33.8535	5.73844	0.169508	15.9693	3.92179	0.245584	8	1.01653	0.127066	5.24342	2.61807	0.25	2.15364	0	0	1.12942	0	0	3.21858	0	0	2.11447	0	0	2.11994	1.0444	0.492653	0	0		0	0
131		26.6029	5.83525	0.219347	11.2821	1.02565	0.0909091	3	0.5	0.166667	2.06931	0.517327	0.0492787	5.38409	0	0	0	0		3.79418	0	0	1.05723	1.58585	1.5	1.04842	0	0	0	0		1	0	0
132		25.3918	1.04371	0.0411044	21.2917	3.445	0.1618	6.77434	1.98053	0.292358	10.4282	0.513889	0.118356	1.73617	0	1.55726	3.55744	0	0	2.31116	0	0	0	0		5.04098	0	0	0	0		0	0
133		19.9143	0	0	16.826	3.75377	0.223094	7.79595	0.785419	0.100747	6.80237	0.805099	0.518206	1.07682	1.67689		0	0		2.52945	0	0	2.11447	0	0	1.85739	1.2914	0.695276	2	0	0	1	0	0
134		28.5157	9.75231	0.341998	12.1247	5.82982	0.480824	6	2.5	0.416667	5.73527	2.97205	0	0	0	0	0	0		3.9359	0.62118	0.157824	1.05723	0.528617	0.5	4.23033	2.61385	0.617883	0	0.5		1	0	0
135		40.8388	8.78648	0.21515	22.1767	2.04341	0.0921425	5.21488	1.98579	0.380793	6.21736	0		7.44269	0		0	0.479458		2.31116	0	0	0	0.949688		2.25212	0.957399	0.42511	0	0.941697		0	0
136		0	2.93555		0	1.66105		0	0		0	1.63098	0.229652	0	0	0	0	0		0	0		0	0		0	0		0	0		0	0
137		21.6035	5.8139	0.269119	18.0667	4.20209	0.232588	6.33284	2.48268	0.392033	6.22295	1.42911	0.138104	1.89507	0	0	0	0		3.18319	0	0	0	0		1.04001	0	0	1.9175	0	0	1.02124	0.494853	0.484559
138		9.4983	1.7235	0.181453	15.0157	0.843271	0.0561592	3.59138	0	0	6.19799	0.855967	0.235832	3.63564	0	0.239266	0	0		4.56705	0	0	0	0		0	0.757947		0	0		0	0
139		22.9875	5.15656	0.22432	15.9605	3.4022	0.213164	7.10856	1.74169	0.245013	3.95948	0.933774	0.135666	3.1476	0.753114	0	0	0		2.12589	0	0	0	0		6.38904	0.712494	0.111518	0	0		2.57838	0.534554	0.207321
140		15.0885	0.464864	0.0308091	15.6833	0.927662	0.0591495	7.47613	0	0	3.46784	0.470467	0	1.31131	0	0	0	0		0	0		0	0		2.10399	0.433479	0.206027	2.17343	0	0	1.69424	0	0
141		37.5443	2.99842	0.0798634	16.2205	0.934184	0.0575927	6.81407	0.913271	0.134027	5.89484	0	0.150609	1.8962	0	0.478943	1.44612	0.564633	0.390447	0	0		1.46114	2.41431	1.65235	3.87623	0	0	2.30794	0	0	1.20637	0.937337	0.776992
142		33.4313	8.83044	0.264137	17.2515	4.8086	0.278735	9.35694	3.19941	0.341929	3.67576	0.553601	0.808923	2.21676	1.0617		1.42283	0	0	1.26473	0	0	2.11447	0	0	2.93213	0	0	0.545947	0.719714	1.31829	0.93812	0	0
143		22.2415	2.31222	0.10396	9.4367	6.06512	0.642716	6.5058	1.67703	0.257775	4.43051	3.58394	1.05692	0	0		0	0.535664		2.31116	0	0	0	0		0	0		0	0		0	0
144		39.2938	2.21304	0.0563203	16.4059	6.90215	0.420711	9.22548	2.99398	0.324534	3.50675	3.70636	0.204296	0	0	0	0	0		0	0		1.05723	0	0	0	0.349949		0	0.5		0	0
145		33.8447	7.91985	0.234005	16.3532	7.50566	0.458972	8.51573	5.74692	0.674859	5.92465	1.21038	0.124208	1.87849	0	0	0	0.420882		2.52945	0	0	0	0.377589		5.06148	0	0	0	0.5		2	0	0
146		47.0749	4.95885	0.10534	5.31836	1.34376	0.252666	0	0.452394		3.58042	0.444718	0.1119	1.87849	0	0	0	0		0	0		0	0		0	0		2.12395	0.859971	0.404893	0	0
147		20.2347	1.54799	0.076502	12.1692	1.01572	0.0834661	2.99028	0.500814	0.167481	4.31217	0.482534	0.174672	4.98582	0	0	1.06262	0	0	0	0		0	0		2.61592	0.550438	0.210418	0.970333	0	0	0	0
148		26.5543	2.11311	0.0795771	20.0112	0	0	8.52548	1.88546	0.221155	3.25243	0.568107	0.955623	1.07682	0	0	1.8599	0	0	3.71281	0	0	2.88558	0	0	4.7905	0	0	0	0		0	0
149		32.1063	6.06067	0.188769	13.501	3.30499	0.244796	9.41443	0.994676	0.105654	1.38144	1.32013	1.22491	1.87849	0	0	0	0.953196		4.56705	0	0	3.26763	0.52097	0.159434	4.12319	0.50398	0.122231	0	0.465592		1.04558	1.00276	0.959049
150		32.8777	13.5428	0.411913	11.4235	7.53392	0.659511	7.38584	3.55891	0.481856	2.8457	3.48571	0.305807	1.07682	0		0	0		0	0		3.1717	0	0	3.03689	0	0	1.83467	0	0	0	1.5
151		35.3341	11.3867	0.322258	13.0312	5.03442	0.386337	6.90903	2.92676	0.423613	5.03945	1.5411	0.291853	0	0	0	0	0.562045		2.13211	0.572858	0.268681	1.04241	0	0	2.95169	0	0	0	0.469117		0.821089	0	0
152		27.5206	6.72326	0.244299	19.903	4.08512	0.205252	8.56381	2.29084	0.267502	4.09305	1.19457	0.664541	4.30727	0	0.494744	2.25884	0	0	1.26473	0	0	4.22894	0	0	2.02459	0	0	0.597546	0.704741	1.17939	0	0
153		40.4041	3.12259	0.077284	15.5248	5.04636	0.325052	7.87738	2.54227	0.322731	2.17147	1.44303	2.44609	2.16889	1.07304		0	0.696984		2.12589	0	0	1.91498	0	0	3.25001	0.980159	0.301586	1.84038	0.686514	0.373029	1.03642	0.491367	0.474102
154		30.7463	8.76926	0.285214	6.70143	10.6785	1.59347	4.61894	5.1948	1.12467	1.69605	4.1487	1.75365	0	0	0	0	0.480961		4.46337	0	0	0	1.14924		0	0.414501		0	0.5		0	0.395001
155		40.2775	13.3098	0.330453	14.2702	7.18299	0.503357	6.89881	3.12065	0.452346	1.45816	2.5571	0.153607	3.80601	0	0.256561	0	0.963425		2.24473	0	0	3.62875	0	0	1.08153	1.5124	1.39838	0	0.480975		1.3474	1.96187	1.45604
156		31.7669	10.7233	0.337561	15.1369	1.77478	0.117249	10.3106	0	0	5.38495	0.827166	1.20278	2.68576	0.689062	0	0	0		2.10295	0	0	2.08365	0	0	3.45206	0	0	0	0		0	0
157		24.4557	16.6024	0.678877	13.6368	8.72554	0.639852	7.73058	3.45182	0.446516	3.71534	4.46871	0.539057	1.30343	0	0	1.12942	0.564711	0.5	3.79418	0	0	0	1.83043		2.995	0	0	0	0		1.03136	1.48834	1.44308
158		35.093	5.13575	0.146347	17.6676	3.03382	0.171717	7	0.500923	0.0715604	5.47202	2.94973	0.530119	3.23045	0	0	2.42824	1.09886	0.452534	2.08151	2.12232	1.01961	5.2632	0	0	1.0306	0.501693	0.486797	1.89025	0.431475	0.228264	2.30091	0.978668	0.42534
159		28.0893	11.8771	0.422832	12.1421	5.45489	0.449255	6.89084	2.81786	0.408928	3.52682	1.86963	0.119396	0.874753	0		2.25884	0	0	1.51399	0.584266	0.385912	1.08767	0.521323	0.479301	3.09577	1.00276	0.323913	0.624493	0.682019	1.09212	0	0.967399
160		35.3967	3.95395	0.111704	18.9423	0	0	9.53534	0	0	5.24151	0.625817	0.653985	0	0		0	0		3.61162	0	0	1.04354	0	0	3.8765	0	0	0.756703	0	0	1.61674	0	0
161		32.4777	24.5279	0.755223	13.0273	6.57986	0.505082	7.86948	2.2373	0.284301	4.41641	2.88826	0.558957	0	0.910066	0.672914	0	0.992289		0	0		1.05199	0	0	2.78381	1.72187	0.618528	0	0.436578		1	0	0
162		24.7	7.91946	0.320626	14.2907	12.3192	0.862043	7.93769	7.33625	0.92423	5.75306	3.21571		1.71847	1.15639	0.0590174	0	0		4.46273	1.55933	0.349413	0	0		4.04919	0.506148	0.125	1.84288	0.409778	0.222357	1.063	1.94244	1.82732
163		22.7244	0	0	17.883	1.81271	0.101365	10.9279	0.889118	0.0813619	0	0.443442	0.343503	8.11797	0.479101	0	0	0		4.46337	0	0	0	0		2.04041	2.08006	1.01944	0	0		0	0
164		32.6472	12.9802	0.397589	16.5423	3.94609	0.238546	9.752	1.41911	0.14552	5.80263	1.99322	0.820493	1.29061	0	1.47825	1.76111	0	0	2.28262	0.874679	0.383191	1.05723	0	0	4.71355	1.57664	0.33449	1	0.5	0.5	0	0
165		34.9671	29.2858	0.837526	16.9017	9.41428	0.557001	8.94838	4.03724	0.451169	5.00036	4.10276	0.960698	1.08738	1.60742	0.260625	1.40208	1.56098	1.11333	4.44577	1.14698	0.257994	2.11447	2.64768	1.25217	3.03689	1.51845	0.5	1	0	0	1.06731	0.484715	0.454146
166		31.6762	17.1196	0.540454	13.7361	12.7436	0.927746	6.10348	6.91722	1.13332	2.75253	2.64435	0.432369	1.8962	0.494198	0.408905	1.76025	0	0	2.59166	1.25792	0.48537	1.04354	0	0	5.26926	2.5254	0.47927	2.02144	0	0	1.09217	0.479756	0.439269
167		31.4668	3.88392	0.123429	19.4655	4.47224	0.229752	10.8836	1.27462	0.117113	4.41712	1.90982	0.331866	2.47349	1.01142	0.289075	0	0		4.58164	0	0	0	0		2.70674	0.539022	0.199141	0.946655	0	0	0.913614	0	0
168		20.3236	15.71	0.77299	12.5098	5.76854	0.461122	4.31626	2.89398	0.670483	5.07602	1.68456	0.497062	1.95956	0.56646	0.926602	1.39433	0	0	3.98266	0.748473	0.187933	2.11447	0	0	2.91341	1.55132	0.532477	0	0.438362		1.55841	0	0
169		36.6817	24.9956	0.681421	12.9734	10.7057	0.825204	4.85894	7.50762	1.54512	4.28854	2.13167	0.34561	1.59161	1.47479	0.25	1.91224	1.87772	0.981948	1.99232	1.73057	0.868623	2.7987	4.25601	1.52071	6.19557	5.05105	0.815267	0	0.432548		1.61674	0	0
170		31.8503	30.2194	0.948797	20.252	12.3101	0.607849	6.06331	6.44861	1.06355	8.80489	3.04306	0.227089	4.30727	1.07682	0.171411	3.25264	0	0	5.18516	0.627465	0.121012	3.1717	0.537846	0.169576	2.31812	2.85607	1.23206	0	0.461909		1	0.5	0.5
171		20.5022	15.6273	0.762226	14.9716	3.03547	0.202748	10.913	0.609637	0.0558635	2.65446	0.602798	1.06959	5.41453	0.928112	0	1.15616	0.558256	0.482855	0	1.0323		3.09121	0.53559	0.173262	0	2.04817		1.4719	0	0	1.49438	1.34752	0.901725
172		36.3841	17.6102	0.484007	13.5436	9.06198	0.669095	5.13051	6.85668	1.33645	1.90602	2.03866	1.14735	4.30727	0	0.625787	1.85686	0.521643	0.280928	0	0.763078		3.03233	2.73532	0.902052	4.25881	3.97261	0.9328	0.946655	0	0	1.68651	1.12212	0.665347
173		28.9545	25.7345	0.888791	12.4084	12.3626	0.99631	8.49012	5.49748	0.647515	2.64115	3.03034	0.243008	4.18797	2.62077	0.134994	0	0		2.20831	0.576422	0.261024	1.12761	1.57836	1.39974	1.71103	6.11723	3.57517	0	0.402		0	0.483517
174		31.159	5.14674	0.165177	15.4237	2.94534	0.190962	8.89878	0.452458	0.050845	4.63472	1.12627	0.125	3.37681	0.455849	0	0	0		3.98232	0	0	0	0		0	3.4947		0	0.430261		1.69424	0	0
175		35.7446	8.73215	0.244292	17.2485	2.05239	0.118989	8	0.509168	0.063646	4	0.5	0.566468	3.23045	0	1.12028	0	1.0113		3.79418	0	0	4.22894	0	0	5.06148	3.21743	0.63567	2	0	0	2	0	0
176		36.7205	15.7809	0.429756	10.0883	7.9967	0.792673	1.77097	2.73331	1.54339	4.36173	2.47078	0.686645	2.09314	2.34489	0.75	0	0		4.23743	2.26606	0.534771	2.24088	2.0613	0.919861	3.28266	3.94859	1.20286	0.640777	0.731969	1.14231	0	0.5
177		29.0289	19.8432	0.683568	15.2977	10.8239	0.707553	8.18871	5.98259	0.73059	3.91272	2.68664	0.5575	2.15364	1.61523	0.253288	0	0.991816		4.00244	1.84898	0.461963	1.26291	2.73606	2.16646	7.66976	6.41757	0.836736	0	0.832924		1.0609	0.985818	0.929231
178		35.4302	18.9231	0.534094	10.8834	10.6597	0.979451	4.92026	6.64672	1.35089	4.26611	2.37836	0.255541	2.18739	0.554038	0.417993	0	0		3.79418	0	0	0	0.52097		5.71984	2.8535	0.498878	1.03803	0.513862	0.495038	1	1	1
179		37.2614	8.84941	0.237496	19.3396	4.61984	0.23888	10.5071	1.34805	0.128298	3.47811	0.888801	0.836177	3.90377	1.63175	0	0	0		4.7271	1.11958	0.236843	2.98029	2.89089	0.970003	2.30345	0.843045	0.365992	0	0		1.75785	0.879301	0.500213
180		39.8621	16.7507	0.420217	15.1011	6.50522	0.430777	7.2783	1.90306	0.261471	3	2.50853	0.207395	2.15364	0		0	0		2.96876	1.21662	0.409808	0	3.1717		3.11341	6.52613	2.09614	0	0.955847		0	0.5
181		22.3294	6.48197	0.290288	13.2511	3.04058	0.229458	3.98411	1.00446	0.252117	7.15506	1.48392	0	0	0	0.755958	0	0		1.97846	0.929431	0.469775	2.11447	0	0	2.9896	3.12514	1.04534	1	0	0	2.13329	0.484853	0.22728
182		20.6328	5.40122	0.261778	16.036	1.25233	0.0780948	6.88446	0	0	5.78693	0	0.503642	1.78338	1.34816	1.18072	0	0.424594		2.78151	1.23275	0.443194	0	0		4.84312	0	0	1.79272	0	0	2.3287	0	0
183		24.4206	9.30373	0.380979	8.07486	6.13472	0.759731	4.92819	3.04701	0.618281	1.99036	1.00243	0.103287	1.60945	1.90031	0	4	0	0	0	0		1.05125	0.530125	0.50428	3.92607	2.27331	0.57903	0	0.581808		1.0233	0.53887	0.526603
184		29.5235	8.7663	0.296926	18.0327	1.48954	0.082602	8.22888	0.493142	0.0599282	4.56058	0.47105	0.0604166	3.23045	0		2	0	0	1.42636	0	0	0	0.752414		1.50171	0.435227	0.289821	1	0	0	2.3287	0	0
185		27.5631	22.7443	0.825175	15.1475	5.08851	0.335931	5.54071	3.96635	0.715857	7.33408	0.443101		0	0	0	0	0		4.1434	1.92806	0.465332	1.05723	0	0	4.08387	2.01603	0.493657	0	0.903937		4.42267	1.59921	0.361593
186		19.6934	4.07713	0.20703	12.198	1.1486	0.0941634	8.83426	0.925253	0.104735	0	0	0.236709	1.92527	0		0	0		4.7758	0	0	0	1.05723		2.6197	2.85375	1.08934	0	0		1.68457	0	0
187		32.5776	6.53499	0.200598	13.1966	2.74306	0.207861	5.42211	2.72565	0.502691	5.05174	1.19579	0.250864	0	0	0.186916	1.37389	0	0	1.26473	0	0	2.05406	0	0	2.00055	0	0	0	0		0.40211	0.853943	2.12366
188		26.2515	15.2118	0.579465	17.5473	5.49312	0.313047	8.11006	3.62625	0.44713	4.32414	1.08477	0.859387	3.02411	0.565256	0	0	0		2.48082	0	0	0	0		2.09902	1.2062	0.574649	0	0		1.41189	0	0
189		27.6762	14.2806	0.515989	15.1118	4.61362	0.305299	10.0916	2.69884	0.267434	1.59487	1.37061	0.365432	3.94004	0		1.54145	0.46504	0.30169	0	0.601242		1.05723	0	0	2.26629	0.480525	0.212031	0	0.409311		0	0.453214
190		31.8247	8.47101	0.266177	9.87034	6.37627	0.646003	3.39928	2.52135	0.741729	4.4716	1.63407	0.727073	0	0	0.166667	0	0		2.31116	0	0	2.93307	1.10207	0.375737	3.37729	1.87444	0.555013	0.945541	0.514826	0.544477	0	0.351721
191		33.8037	11.1192	0.328935	17.3613	7.1526	0.411986	9	2.53972	0.282191	4.93703	3.58958	0.384182	3.23045	0.538409	0	0	0		3.79418	0	0	2.11447	0	0	3.03689	2.03791	0.67105	0	0		1	0	0
192		32.1428	1.64554	0.0511947	7.52871	2.06145	0.273812	1.79345	1.22829	0.684876	2.06862	0.794727	0	3.75057	0	0.471016	0	0		4.27019	0	0	3.1717	0	0	0	0.36494		0	0		0.88644	0.618941	0.698233
193		40.1148	4.1053	0.102339	9.30499	1.23996	0.133258	3.57541	0	0	5.79882	0	0.24064	1.88305	0.886945	0	0	0.421984		2.31459	0	0	5.30648	0	0	3.00342	1.30568	0.434731	0	0		2.34489	0.38857	0.165709
194		36.9439	11.5656	0.313058	21.9531	4.76682	0.217136	11.5325	2.09417	0.181588	4.10372	0.987521	0.148774	4.30727	0	0	0	0		1.52159	0.583141	0.383244	0	0.422494		0	1.50496		0	0		2.14561	0.490223	0.228478
195		26.7545	6.63324	0.24793	16.4292	1.34749	0.082018	5.84067	0	0	9.05494	1.34714	0.345334	1.31182	0	0	0	0		3.08847	0	0	2.1805	1.04147	0.477626	0	0.396286		1.18859	0	0	0	0.444032
196		32.9423	8.27703	0.251258	15.4114	3.13678	0.203536	7.20027	0.526899	0.0731777	5.98746	2.06767	0.955139	2.15364	0	0.100703	1	0	0	2.52945	1.35907	0.5373	3.1717	0	0	0	0.369129		1	0.582013	0.582013	2	0.5	0.25
197		22.2066	3.4618	0.155891	19.0642	10.6065	0.556357	6.07946	3.21644	0.529068	5.37684	5.13563		8.96004	0.902307		0	0		1.64536	0.571832	0.347543	1.76307	0	0	5.29435	0	0	0	0		1.13717	0.505525	0.444548
198		0	0.668976		0	1.01862		0	0.334618		0	0.33428		0	0.362223		0	0		0	0		0	0		0	0		0	0		0	0
199		36.4933	14.714	0.403196	0	1.71784		0	0.671568		0	0.691291	0.100868	0	0.360028	0	0	0		2.80093	1.20627	0.430667	1.05723	0	0	3.35945	0.965925	0.287525	0	0		0	0.5
200		23.3446	6.74245	0.288823	16.0977	3.9502	0.24539	7.16213	1.7508	0.244453	6.09541	0.614829	0	3.4025	0	0	0	0		0	0		0	0		4.04919	0	0	0	0		0	0.5
201		38.2262	13.4054	0.350688	13.5016	2.99455	0.221792	5.73116	1.05218	0.183589	2	0	0.36033	2.15364	0		2.45777	0	0	2.52945	0	0	0	0.401616		0	0		1.89025	0	0	0.859791	0.630444	0.733253
202		32.7011	15.9305	0.487156	13.7281	7.31727	0.533016	6.19038	3.48584	0.563106	5.42541	1.95494	0.869526	0	nan		1.5972	0.919884	0.575935	2.20831	0	0	0	0		0	nan		1.18851	0	0	0	1.01177
203		36.3491	9.71937	0.267389	18.4917	11.6211	0.62845	10.7919	3.79105	0.351287	5.30313	4.61121	0.789702	0	nan		4.22099	1.98985	0.471417	0	0		0	0		0	nan		1.30284	0.454497	0.348851	0	0
204		26.3777	5.1401	0.194865	18.8436	11.8995	0.63149	7.90025	3.64477	0.461349	10.4844	8.27958	1.097	0	nan		3.28125	3.05353	0.9306	4.83846	0	0	0	0		0	nan		0	0		1.82038	0.935284	0.513784
205		28.0971	10.204	0.363167	18.9127	10.3442	0.546945	8.2943	0.646517	0.0779472	6.84459	7.50851	0.77944	0	nan		2.08996	4.22829	2.02315	0	2.1198		0	0		4.47834	1.93947	0.433078	1	0	0	1	0.550919	0.550919
206		33.3154	15.832	0.475218	21.8273	10.5705	0.484281	8.6548	1.58299	0.182903	9.16827	7.14612	1.31125	0	nan		1.55408	0.425581	0.273848	2.93724	1.19133	0.405595	4.36023	0.523071	0.119964	1.86577	1.0573	0.56668	0	0		1.3071	0.659309	0.504407
207		23.5816	19.7205	0.836263	22.6815	18.5441	0.817587	9.65966	6.41556	0.66416	7.27329	9.53709	0.865842	0	nan		1.36746	1.76311	1.28933	2.99022	3.65444	1.22213	0	0.379046		6.38007	0.531672	0.0833333	0	0		0	0.653549
208		19.1189	12.288	0.642717	21.3758	10.8563	0.507875	8.06657	2.31365	0.28682	8.55253	7.40515	1.21616	0	nan		4.28232	2.06625	0.482508	1.87224	2.40489	1.2845	0	0		3.79674	0.790437	0.208188	0	0		1.3071	0.690885	0.528564
209		23.8432	20.2533	0.849438	11.9174	11.3225	0.950087	5.99804	4.30597	0.717897	2.68728	3.26817	0.458294	0	nan		2.5439	0.747025	0.293654	1.8766	0.956179	0.509529	0	1.97165		0	1.84186		0	0.441324		1.3071	0	0
210		29.2509	6.23391	0.213119	15.3835	6.29565	0.409248	9.32467	3.33268	0.357404	6.59698	3.02336	0.148581	0	0	0	0	0.870729		3.96887	0.508037	0.128006	0	1.14729		2.54815	0.631606	0.247868	0	0.929193		1.90047	0.817716	0.43027
211		24.0263	5.01812	0.208859	14.6306	2.00012	0.136708	5.06624	1.49026	0.294154	4.86657	0.723082		2.15364	0	0.209493	0	1.00862		2.30858	1.13229	0.490468	3.1717	0.528617	0.166667	4.04919	2.02459	0.5	1	0.5	0.5	2.30091	0.469312	0.203968
212		31.5937	13.9105	0.440292	12.6243	2.69054	0.213124	7.19517	1.322	0.183735	0	0.887996	1.1319	2.19598	0.460041	0.498195	0	0		3.97687	1.32562	0.333333	0	0		0	1.14898		0	0		0	0
213		29.4014	9.89538	0.336562	9.66127	7.46894	0.773081	7.33606	4.27249	0.582396	1.59471	1.80505	0.323968	1.92053	0.956796	0.663023	1.59769	0	0	4.86745	2.0583	0.42287	0	0.43948		1.52035	0.45271	0.297766	1.9175	0	0	0.734363	0.683485	0.930718
214		24.392	10.5918	0.434231	19.4552	8.19149	0.421044	10.1443	3.98485	0.392816	6.11564	1.98127	0.785457	2.34198	1.55279		0	0		0.936962	0	0	0	0		2.02459	0	0	0	0		1	0	0
215		14.3828	8.76758	0.609588	11.1807	3.913	0.349979	8.63296	2.45664	0.284565	1.1821	0.928486	0.967505	0	0.536721	0	1.1634	0	0	2.82286	0	0	2.8979	0	0	3.04216	0.913479	0.300273	0.724891	0.700997	0.967037	1.05664	0	0
216		22.8503	12.1716	0.532668	17.6295	10.4128	0.590645	8.93582	6.6952	0.749255	4.11862	3.98479	0.166922	1.73617	0	1.26725	0	0.459486		2.13931	0.502746	0.235003	0	1.17513		1.24562	1.40767	1.13009	0	0.831897		1.69424	0.44602	0.263257
217		17.8661	10.036	0.561731	9.84776	5.55466	0.564053	5.30758	1.85962	0.35037	2.99835	0.50049	0.648315	1.21736	1.5427		0	0		3.35497	1.17104	0.349048	1.05196	0.529947	0.503773	3.65799	1.51437	0.413989	1.16835	0.53594	0.458714	0.908276	1.15529	1.27195
218		13.4756	7.17613	0.532529	13.0531	5.75245	0.440695	9.29478	2.95317	0.317724	2.63287	1.70693	0	0	0.538409	0	0	0.513388		2.30858	0.566143	0.245234	1.0782	0.523528	0.485558	2.02459	1.0123	0.5	0	0.46629		0	0
219	SRS2	23.6417	19.0709	0.806664	25.1633	1.52959	0.0607865	14.2413	1.52488	0.107074	7.57022	0	0.75633	3.23045	0		1	0	0	0	0		1.05723	0	0	2.33854	0	0	0	0		0	0
220		24.2015	8.12354	0.335662	8.79978	3.59244	0.408242	6.94597	0.894039	0.128713	1.76539	1.33522	0.248298	0	1.39824	0.49831	0	0		4.18481	0	0	0	0		2.8737	3.60551	1.25466	0	0.421002		1.41536	1.00677	0.711318
221		31.8824	17.2786	0.541947	14.7674	3.15599	0.213714	5.33244	0	0	6.15789	1.52899	0	2.15851	1.0756		0.777294	0	0	3.27992	1.33657	0.407501	1.05723	0	0	2.02459	0	0	2.36221	0.495999	0.209973	0	0
222		30.1773	17.6583	0.585151	12.6367	1.57847	0.124911	4.26595	0	0	4.08194	0	0.579346	0	0.538409		1.55285	0	0	3.41858	0.602495	0.176241	1.05723	0	0	4.06847	1.51485	0.37234	1.09264	0.479665	0.438995	1	0	0
223		18.4228	12.7269	0.690825	10.2431	6.68609	0.652741	7.10019	2.7131	0.382117	3.76502	2.18125	0.119558	0	1.48615	0	4.73357	0	0	3.99537	0	0	0	0.902226		2.33908	0	0	0	0		0	0
224		34.7698	6.62398	0.19051	14.352	0.959812	0.0668764	6.67418	0.484539	0.0725991	3.86564	0.46217	0	2.62035	0	0	2.09607	0	0	3.96947	1.38373	0.348594	2.12338	1.05502	0.496859	4.53793	1.6157	0.356044	0	0		0	0.4837
225		39.0903	22.7155	0.581102	22.1569	0	0	9.15543	0	0	7.78355	0	0	5.41642	0	0	2	0	0	1.0978	0	0	3.1717	0	0	6.15781	1.00544	0.163278	0	0		1.07227	0.4837	0.451099
226		22.5877	6.15845	0.272646	14.7359	0	0	5.33244	0	0	4.08194	0		4.30727	0	0	3	0	0	3.41858	0	0	0	0		3.03689	0	0	0	0		1	0	0
227		23.8854	12.6609	0.530067	17.3717	1.38882	0.0799473	9.89923	1.40551	0.141981	0	0		4.27078	0	0	3.11797	0	0	3.41858	0.569764	0.166667	1.09137	2.08191	1.90762	5.06148	0	0	0	0		1	1.03273	1.03273
228		27.955	3.18818	0.114047	7.89889	2.03447	0.257564	3.62549	0	0	0	1.76656	0.145694	1.78338	0	0	1.58487	0	0	1.90063	0	0	0	0		0	0		0	0		0	0.408229
229		30.1735	1.2603	0.0417686	18.2837	2.17085	0.118731	11.0033	0.881959	0.0801543	5.69003	0.829002	0.337152	1.73617	0	0.25	1.5807	0	0	3.931	0	0	0	0		0	0		0	0		2.3287	0	0
230		27.1103	12.6851	0.467907	13.3462	4.52069	0.338725	8.75091	2.63327	0.300913	3.16626	1.06751	0.249332	2.15364	0.538409	0	1	0	0	0.968039	0	0	0	0		3.06467	4.04579	1.32014	0	0		2.00476	1.0195	0.508542
231		29.0996	13.3275	0.457996	20.2077	3.23246	0.159962	7.46541	0.561837	0.0752586	6.28487	1.56702	0	4.30727	0		0	0		3.41858	0	0	0	0		0	0.810847		1	0	0	2.13851	0.96863	0.452946
232		24.4578	1.26714	0.0518094	9.13659	1.30269	0.142579	3.64646	0	0	1.87158	0		0	0.884719	0	0	0		3.82979	0	0	0	0		0	0		0	0		2.3287	0	0
233		18.5776	11.7225	0.631001	14.8639	2.22748	0.149858	9.55766	2.28812	0.239401	0	0.422844	0.433366	5.6632	0	0	0	0		4.9787	1.29556	0.26022	0	0		0	0.499437		0	0		0	0.469312
234		14.705	6.15372	0.418477	14.5728	3.87927	0.2662	6.75889	1.52942	0.226282	4.16021	1.80289		2.55969	0		0	0		1.46748	0.512497	0.349235	0	0		2.64442	0.453053	0.171324	1.32939	0	0	1.55286	0	0
235		61.1422	4.26328	0.0697273	25.4724	2.80372	0.110069	11.4437	0.573352	0.0501018	0	1.57681	1.64484	0	0	0	0	0		0	0.566601		0	0		4.04919	2.02459	0.5	0.965123	1.09454	1.1341	2	0	0
236		37.085	3.86961	0.104344	14.537	5.55839	0.382362	7.03263	1.78238	0.253444	1.38041	2.27055	0.112176	5.38409	0		0	0		6.16928	0	0	1.08596	1.56515	1.44127	2.4204	2.84875	1.17698	0	0.414152		2.04887	0.398101	0.194302
237		26.5208	9.52057	0.358985	11.3566	7.08351	0.623734	6.47792	4.96255	0.766071	8.37288	0.939238		0	0	0.512184	0.777164	0	0	0	0.784148		0	0		0	1.20905		0.746463	0	0	1.51086	0.879666	0.58223
238		15.5242	4.03069	0.259639	8.78813	4.29799	0.489068	5.04978	2.44265	0.483714	0	0.464366	0.167245	1.86524	0.955349		2.63994	0.953292	0.361104	1.36013	0	0	2.50445	0	0	4.98781	0	0	1.25941	0.953773	0.757317	0	1.22377
239		34.7	11.267	0.324699	5.84818	5.88285	1.00593	0	2.68908		5.39956	0.903047	0.924916	0	1.48233	0.448787	1.27016	0.476006	0.37476	0	0		14.3847	1.23161	0.0856198	2.02459	0	0	0	0.865712		2.03589	0.398595	0.195785
240		15.3757	11.5216	0.749339	9.73518	10.2755	1.05551	2.51148	7.49704	2.98511	3.69849	3.4208	0.109893	2.31748	1.04005	0.263825	0	0.496045		3.1003	0.722	0.232881	0	0		0	0		1.32939	0	0	0	0.537232
241		22.9192	1.46177	0.0637794	10.8973	1.7513	0.160709	5.51204	0	0	3.69993	0.406595	1.28582	1.87543	0.494784		0	0		0	0		5.42588	0	0	9.44312	0	0	0	0		2.3287	0	0
242		16.0478	9.08361	0.566036	6.01052	8.16117	1.35781	3.76034	4.06802	1.08182	1.8629	2.39536	0.309748	0	1.53841	0	1.45223	0	0	3.07529	0	0	0	1.03842		3.72864	0.528882	0.141843	0.886677	0	0	0.959122	0.573536	0.59798
243		29.2832	3.70286	0.12645	14.4792	3.86653	0.267041	5.60403	1.1287	0.201408	4.97044	1.53958	0	1.07682	0	0.241582	1.5972	0	0	2.1692	0	0	0	0		0	0		0	0		1.67898	0	0
244		30.2062	1.54287	0.051078	12.544	2.89326	0.23065	6.17331	0.515447	0.083496	2	0	0.11804	4.05088	0.97862	0	0	0		2.27906	0	0	2.11447	0	0	2.02459	0	0	0	0		1	0	0
245		21.9188	9.10933	0.415594	15.4354	3.08731	0.200015	7.6479	2.81761	0.368417	3.49057	0.412027	2.23651	1.71554	0	0.250283	1.01078	0.497349	0.492046	0	0.481279		2.55685	0.806526	0.315437	2.09249	1.50269	0.718134	0	0.475124		1.50134	0	0
246	SRS3	27.0683	19.8032	0.731602	16.2	8.62955	0.532689	11.3592	3.24868	0.285994	1.10791	2.47785		3.78704	0.947833		0	0		0	0		3.1717	0	0	4.96835	3.60001	0.72459	0.901953	0	0	1.58095	1.34427	0.850295
247		27.6308	4.39261	0.158975	1.72667	2.3526	1.36251	1.648	1.41424	0.85816	0	0	0	0	0.991658	0.187721	1.50864	0.460714	0.305384	0	0		0	0		6.36638	1.98764	0.312209	2.31177	0	0	1.67898	0	0
248		20.6635	7.90709	0.38266	12.7376	1.44856	0.113723	6.18456	0.940638	0.152095	2.54692	0	0.380189	2.77044	0.52007	0.376236	1.20658	0	0	0	1.03588		1.05723	0	0	4.51023	1.97589	0.43809	0	0		0	0
249		33.5519	16.1428	0.481129	19.651	7.4746	0.380368	10.7405	3.24318	0.301957	4.84036	1.84025	0.449848	3.9389	1.48196	1.03998	1	0	0	4.14561	0	0	0	0.421437		4.04919	0.506148	0.125	0	0		0	0.724514
250		25.0887	9.8367	0.392077	7.67863	9.27304	1.20764	3.31473	4.62435	1.39509	4.4034	1.98086	0.493473	1.75884	1.82916	0.0743921	0	0		6.59353	1.35076	0.204862	5.10073	0	0	2.14212	2.95581	1.37985	0	0.409311		1.63057	0.882434	0.541181
251		24.8087	17.0623	0.687757	19.5919	4.48918	0.229134	10.8592	1.879	0.173034	3.37998	1.66793	0.592956	6.19992	0.461225	0	1.55177	0.424525	0.273575	4.01654	0.961423	0.239366	4.22894	0	0	2.49593	1.97671	0.791972	0	0		0	0.911101
252		23.7727	13.1305	0.552337	21.3968	2.92813	0.136849	11.5189	1.25402	0.108867	3.29853	1.95588	1.12659	4.56006	0	0.143445	0	0.5		3.68225	1.10014	0.298768	0	0		4.04919	0	0	0	0		1	0	0
253		39.4923	10.764	0.272561	10.6995	4.51562	0.422042	3.88	1.93649	0.499096	1.82216	2.05282	0.896226	3.25583	0.467033	0	0.900312	0	0	3.9412	0	0	0	0		11.3476	1.15035	0.101374	1.89025	0	0	2.45331	0.636385	0.259399
254		34.419	21.2549	0.617535	18.2298	9.81201	0.538239	10.8598	4.82848	0.444619	4.38562	3.93051	0.683256	3.72424	0	0.128334	0	0.427775		4.76374	1.70389	0.357679	1.02396	0	0	3.88066	2.18949	0.564206	1.00509	0	0	1.57654	1.34681	0.854282
255		16.9412	9.50629	0.561136	10.6789	3.31519	0.310444	6.11956	0.942778	0.15406	1.35863	0.928294	0.150385	3.83398	0.492029	0.253805	1.52296	0.463921	0.304618	1.90831	1.02738	0.538375	2.51431	0	0	6.67944	0.493609	0.0738997	0	0		0	0.901044
256		20.5787	4.51004	0.21916	15.872	4.21547	0.265591	6.80284	1.47465	0.216769	5.62406	0.845775	0	3.63564	0.922742	0	0	0		0	1.37385		0	0		4.84291	0	0	0	0.5		2.35443	0	0
257		32.2872	1.71237	0.0530354	8.76901	0	0	1.68479	0	0	3.72124	0	0.48004	3.72424	0	0	0	0		0	0		10.3483	0	0	0	0		0	0		2.19156	0	0
258		32.3034	25.924	0.802516	15.5757	6.57181	0.421928	7.20027	3.99576	0.554946	4.12606	1.98067	0.262917	2.15364	0		1.94026	0.517602	0.26677	2.58519	2.70198	1.04518	0	0.528617		3.03689	0	0	0	0.5		0	0
259		18.784	5.87098	0.312552	8.87334	6.63914	0.748212	4.031	2.52273	0.625832	4.61275	1.21277	1.07314	0	1.58327		0	0		0	0		0	0		2.56488	0.56036	0.218474	0	0.537103		0	0.564188
260		14.6005	8.02486	0.549628	9.87119	4.18193	0.42365	7.44791	1.22468	0.164433	0.956731	1.02671	0	0	0.509528	0	0	0		0	0.392699		0	0.354051		3.90623	1.55612	0.398368	0	0		0	0
261		20.8806	2.30538	0.110408	12.5292	1.3523	0.107932	3.42422	1.34684	0.393326	3.60192	0		4.22235	0	0.139119	1.57789	0	0	0	0		0	0		4.66653	0	0	0	0		0	0
262		22.0734	8.91241	0.403762	8.32124	4.16485	0.500508	4.84451	2.27445	0.46949	0	0.909487	0.566212	3.57617	0.497512	0	2.45043	0	0	4.30121	0.502127	0.116741	2.9242	0.559243	0.191246	0.378143	4.01989	10.6306	0.610379	1.61084	2.63908	0	0
263		20.651	5.84865	0.283213	17.9393	5.0266	0.280201	10.6543	2.05104	0.192508	4.27687	2.42162	0.124704	2.15364	0		0	0		0	0		3.64204	0	0	9.15074	0.700703	0.0765734	0	0		0	0
264		25.0681	6.234	0.248683	11.3346	2.49223	0.219877	6.57852	1.51126	0.229726	3.673	0.458037	1.05579	0	0.491722	0	0	0		1.84869	0	0	1.91365	0	0	3.57982	0.415823	0.116157	0	0.356395		2.65285	0.381236	0.143708
265		21.6057	11.1059	0.514025	12.0526	9.77787	0.811266	3.12309	4.00552	1.28255	5.01559	5.2954	0.211001	1.8962	0	0	0	1.37635		1.95331	0.51595	0.264141	0	0		1.36163	2.75552	2.0237	0	0		0	1.38821
266		24.4039	3.46926	0.14216	9.69577	6.05841	0.624851	1.69464	4.63708	2.73633	4.05112	0.854788	0	2.09314	0	0	0	0		0	0		4.22894	0	0	1.89923	1.64134	0.864213	0	0		1.74973	1.19398	0.68238
267		18.4331	5.17211	0.280588	18.4338	1.09581	0.0594459	9.1503	1.50671	0.164663	6.42079	0	0	2.95421	0	0.735214	0	0		1.90063	0	0	0	0		2.33903	0	0	0	0		1.78723	0	0
268		16.5289	8.33983	0.504559	20.3212	2.29347	0.112861	12.2538	0.903908	0.0737658	5.9351	0	0.228181	1.59488	1.17258		0	0		2.1771	0	0	13.6908	0.383131	0.0279845	0	0		0	0.844481		1.77647	0	0
269		33.4188	4.17536	0.12494	18.8692	5.37449	0.284829	7.36819	3.0972	0.420348	7.70096	1.75721	0.275107	0	0.475426	0.177915	0	0.5		1.98794	0.51126	0.257181	1.05723	0.528617	0.5	2.36271	1.26341	0.534728	0	0		0	0.460643
270		29.9354	14.4225	0.48179	16.147	7.43327	0.46035	9.93156	4.16145	0.419013	4.367	1.20139	0	2.73535	0.486661	0.234359	0	nan		2.27906	0.569764	0.25	0	0.88598		7.28503	2.85397	0.391758	0.608779	0.704343	1.15698	0	1.54549
271		24.215	4.87386	0.201275	17.8503	1.97537	0.110663	7.5943	0	0	4.63606	0	2.79626	4.25768	0.997825	0.343623	0	nan		2.73537	0	0	3.90908	0	0	5.26345	0	0	1.1072	0	0	0	0
272		12.4154	14.1759	1.1418	6.81934	6.78951	0.995625	1.48937	3.65084	2.45127	0.750475	2.09852	1.28561	2.96357	1.01835	0.999323	0	1.8407		4.55811	0	0	1.3409	1.4675	1.09441	6.44261	3.77198	0.585474	0	0.849535		0	0.827685
273		37.7158	12.3968	0.32869	8.9917	9.10404	1.01249	5.2979	4.49149	0.847788	2.0136	2.58871	0.791019	1.56938	1.56831	0.383385	1.5567	1.34545	0.864299	6.05658	0.509826	0.0841773	2.74287	2.55753	0.932426	6.02563	5.61724	0.932225	1.91486	0.448679	0.234314	1.19353	0.994992	0.833659
274		19.7275	20.3586	1.03199	18.6175	9.28954	0.498967	7.16828	3.72415	0.519533	5.47756	4.33285	0.684424	3.82642	1.46699	0.536701	0	0.881372		3.79342	0.514125	0.135531	3.061	2.3217	0.758477	8.49063	5.43329	0.639916	0	0.405058		1.13883	0	0
275		36.6506	19.6746	0.536814	18.3583	12.2477	0.667147	8.9408	3.7608	0.420633	7.44167	5.09326	1.42651	4.08622	2.19308	0.824562	1.57943	0.913149	0.578151	0	1.08667		2.38177	5.27596	2.21514	12.2508	4.76916	0.389292	0	0		1.67898	0	0
276		32.3584	19.9316	0.615963	14.8457	15.4323	1.03951	8.52875	7.86909	0.922655	2.92378	4.17081	0.795574	2.5767	2.12465	0.704237	0	0.859333		0.593226	1.96849	3.31828	0.94765	3.8939	4.109	6.87133	7.00164	1.01896	0	1.25703		0.270555	1.25372	4.63388
277		30.7757	41.9317	1.36249	17.9138	16.1978	0.904209	6.15274	8.23863	1.33902	6.51559	5.18363	0.359481	2.46512	1.73603	1.8301	0	0.5		1.84786	0.95625	0.517489	0.790478	3.04245	3.84888	5.65679	7.25585	1.28268	0.824581	1.3187	1.59924	0	1.20568
278		23.7943	23.3207	0.980097	21.0619	14.7408	0.69988	9.6902	6.1202	0.631587	10.4553	3.75849	1.02353	1.35382	2.47763	0.630445	0	0.550684		0	0.957995		1.49568	2.99798	2.00443	3.63319	6.96916	1.91819	1.08499	1.20715	1.11259	2	0	0
279		29.6091	29.0815	0.982183	18.5891	17.4342	0.937869	8.40801	7.03363	0.83654	6.33094	6.47989	0.970621	3.82638	2.41232		2.03528	1.00482	0.4937	0	0		2.24197	3.62574	1.61722	6.19336	8.07649	1.30406	0	0.523553		0.579124	1.68256	2.90535
280		8.42486	13.121	1.55742	19.7964	11.1745	0.56447	10.1901	5.21515	0.511784	5.63683	5.47123	0.675252	0	0		0	nan		0	nan		0	3.31027		5.38607	6.08367	1.12952	0	1.02078		0	nan
281		9.78291	13.6332	1.39358	12.4972	13.0678	1.04566	4.37405	4.77118	1.09079	5.98397	4.04069	0.491072	0	0	0	0	nan		0	nan		0	0.902841		10.9591	8.53632	0.778922	0.531152	1.42252	2.67818	0	nan
282		13.3376	22.4457	1.68289	16.6837	9.97423	0.597841	6.03755	3.97003	0.657556	7.71724	3.78972	0.747734	4.78909	0	0.511621	0	nan		0	nan		0.969989	2.52951	2.60777	1.77339	5.35944	3.02215	1.18491	0	0	0	0
283		16.8279	12.2837	0.72996	19.0329	14.1977	0.745956	4.91836	6.93232	1.40948	7.88964	5.89935	0.488569	1.92754	0.986169	0.0999198	0	nan		0	nan		1.45907	0	0	6.83093	7.64192	1.11872	0	0.544753		1	0	0
284		14.4781	22.5312	1.55623	23.9639	11.6126	0.484587	8.22218	6.55424	0.797141	7.80544	3.8135	1.58881	5.43806	0.54337		0	nan		0	nan		2.50674	0	0	7.72004	6.25458	0.810174	0	0		1.65953	0.844081	0.508627
285		25.0036	16.3143	0.652478	6.50901	8.35755	1.284	3.22063	5.48644	1.70353	1.78312	2.83304	0.324717	0	0	0.958441	0	nan		0	nan		3.35658	2.57681	0.767689	3.57706	5.7137	1.59732	2.22686	0	0	2.04289	0.398327	0.194982
286		22.1491	33.3903	1.50752	17.9986	8.1878	0.454913	6.22091	4.1895	0.673454	5.39976	1.75339	0.362638	2.63752	2.52791	0.503972	0	nan		1.3082	0	0	2.53951	2.10826	0.830181	3.21793	7.43343	2.31	0	0.430261		1.61273	0.731263	0.453433
287		21.9182	17.8742	0.815496	16.2675	5.91948	0.363884	4.95028	2.53117	0.511317	4.09654	1.48556	0.57857	1.78338	0.898774	0.0833333	0	1.31592		1.98161	0	0	2.86807	4.844	1.68894	0	2.36155		0	0.936231		1.18098	0.928831	0.786492
288		24.6985	8.39792	0.340017	17.4481	6.06534	0.347621	6.86177	2.71422	0.395557	3.16683	1.83223	0.254032	6.46091	0.538409	0.490527	1.20662	0	0	0	0		0	0		0	0.428523		0	0.420122		1.60405	0.448379	0.279529
289		10.0115	2.08274	0.208035	9.17504	2.60758	0.284204	3.38424	0.415106	0.122659	4.94246	1.25554		1.09068	0.535009	0	0	0.852102		1.90568	0	0	0	0		0	0		0	0.402		0	0
290		28.6715	10.5384	0.367557	6.29973	1.29521	0.205598	2.76449	1.32428	0.479033	0	0	0	3.63564	0	0	0	0		2.26007	0.574235	0.254078	1.73401	2.28132	1.31563	3.68027	0	0	1.83467	0	0	0	0
291		8.93365	1.50661	0.168645	13.2171	1.06226	0.0803698	5.42115	0	0	2.91525	0	0.218498	5.30551	0	0	0	0		1.90063	0	0	2.06893	0	0	6.76275	0.521042	0.077046	0	0		1	0	0
292		15.4692	2.48328	0.160531	27.5335	1.65918	0.0602607	12.4677	0	0	7.44396	1.62649	0.545456	5.41925	0		1.58505	0	0	5.79443	0	0	5.54201	0	0	4.84312	0	0	0	0		2.19156	0	0
293		19.1967	7.23622	0.37695	5.94158	6.60211	1.11117	1.03941	3.39973	3.27084	4.06477	2.21715	0.58164	0	0		2.38885	0.462369	0.193553	0	0		8.19275	0.771166	0.0941279	2.37021	0.393444	0.165995	1.33889	0	0	1.55286	0	0
294		25.9242	1.29514	0.0499589	3.33169	2.12681	0.638359	1.82931	1.26977	0.694125	0.9827	0.571578	0.548625	0	0		0	0		1.9112	0.700815	0.366688	2.9839	0	0	2.84901	0	0	0	0		0	0.548922
295		22.3472	7.13855	0.319438	8.74395	1.56405	0.178872	6.65649	0.517085	0.0776815	1.8861	1.03476		0	0		2.91745	0	0	0.96756	0	0	9.41206	0	0	0	0.783554		0.746463	0	0	1	0	0
296		28.9775	7.03425	0.242749	5.31419	1.6922	0.318431	5.08194	0.414994	0.0816606	0	0	1.45365	0	0.918361	0.763802	0	0.42528		0	0.463516		5.52923	0	0	4.66918	0.359474	0.0769888	0	0		2.18329	0	0
297		30.8866	3.32169	0.107545	14.096	8.94005	0.634225	8.13058	2.9761	0.366038	2.2308	3.2428	0.695194	1.78338	1.36215	0	0	0		3.62974	0.703873	0.193919	0	0		4.59055	1.3454	0.29308	0	0.5		1	0.5	0.5
298		25.3064	15.8136	0.624883	13.425	9.32699	0.694748	3.82061	7.60038	1.98931	4.36467	3.03429	0.163102	3.23045	0	0.127408	1.55259	0.49551	0.319151	0	0		0	0		3.25464	1.44815	0.444951	0	0.348218		1	0.5	0.5
299		21.5023	4.84241	0.225204	18.1269	3.57147	0.197026	5.46988	1.27577	0.233236	5.43682	0.886753		7.66267	0.976283	0	0	0		0	0		2.55578	0	0	2.16683	1.67864	0.774701	0	0		1.69424	0	0
300		22.2228	2.07038	0.0931646	12.0248	5.60455	0.466083	5.76144	3.66493	0.636114	0	2.5582	0.789535	5.32754	0		1.58487	0	0	1.13953	0.569764	0.5	0	0		0	0.358051		0	0		2.34489	0.38857	0.165709
301		29.7372	11.3084	0.380277	9.35442	4.33195	0.463091	7.04164	2.71456	0.385501	2.0979	1.65636	0.735176	0	0		0	0		0	0.478841		6.10991	0.835458	0.136738	1.93728	5.53162	2.85535	2.12395	0.429546	0.202239	0	1.33583
302		30.5619	15.4453	0.505376	13.3205	8.35661	0.627351	8.84122	4.02048	0.454743	3.78281	2.78103	0.971055	0	1.05691		0	0		1.16231	0.564233	0.48544	1.07307	1.04949	0.978023	1.76436	3.4913	1.9788	0	0.842276		2.1473	0.801862	0.373428
303		21.465	11.8263	0.550958	16.2196	10.5968	0.653332	7.45934	3.68833	0.494458	6.0801	5.90412	0.372944	0	0	0.080794	1	0.52817	0.52817	1.26473	1.26473	1	0	0		2	0	0	1	0.583132	0.583132	0.759881	1.09924	1.4466
304		35.7417	2.7014	0.0755812	12.4514	1.82833	0.146838	3.415	0	0	3.66312	1.36614	0.080837	5.8395	0.471797		0	0		2.32198	0.518872	0.223461	0	0		2.3103	0	0	0	0		1.67898	0	0
305		36.8243	12.8561	0.349119	13.6451	4.18483	0.306691	5.73747	2.82586	0.492527	6.12353	0.495007	0.484948	0	0	0	0	1.0476		0	0.527834		0	0		4.95372	1.593	0.321577	0	0.475124		0	0.351857
306		30.8802	9.78043	0.316722	19.8775	6.89294	0.346771	8.59885	3.22261	0.374773	5.49661	2.66557	0.743713	2.24572	0	0	1.56866	0	0	2.1771	0	0	1.93151	2.78633	1.44256	0	0.858591		0.86237	0.658784	0.763922	0	0.459651
307		22.6966	4.06833	0.179248	8.3093	5.06254	0.609262	4.66399	2.4692	0.529418	1.67794	1.2479	0.595	3.81732	0	0	1.94887	0	0	0	0		0	0		1.00912	0	0	0	0.570426		1.58422	0	0
308		34.3028	6.39747	0.1865	13.6827	4.06286	0.296934	4.07983	0.990311	0.242734	4.39548	2.61531	0.187999	4.30727	0	0.514257	3	0	0	2.27906	0	0	1.15055	1.52404	1.32462	2.04929	0.503117	0.245508	0	0		2	0	0
309		15.7242	7.96817	0.506747	9.15575	3.029	0.33083	4.74497	1.03836	0.218833	2.57161	0.483461	0.750318	1.91449	0.984543	0.220728	0	0		2.82835	0.569433	0.201331	6.46138	0	0	4.60476	0	0	0	0.466622		0	0.5
310		20.9842	9.52657	0.453989	10.994	7.45269	0.677885	5.08403	2.91658	0.573676	4.08903	3.06807	0.0682198	2.09433	0.462276	0.248837	0	0		4.26205	1.53279	0.359636	4.60164	0	0	5.65357	1.99858	0.353508	2.17343	0	0	1.69424	0	0
311		23.8113	0.815222	0.0342367	18.4937	1.2814	0.0692884	8.77978	0	0	5.88617	0.401553	0.389967	2.18746	0.54432	0.189177	0	0		0	0		0	0		0	0.367907		1.79379	0	0	2.3287	0	0
312		22.4275	3.64064	0.162329	14.7567	5.13811	0.348188	6.14341	2.29226	0.373125	4.75242	1.85329	0	2.61525	0.494746		2.42362	0	0	2.27906	0	0	0	0		2.35861	0.393766	0.166948	1.1982	0	0	0	0
313		21.9837	1.37625	0.0626033	10.8649	0	0	7.33937	0	0	1.81829	0	0.5	0	0	0	0	0		0	0		2.50844	0	0	9.27686	0	0	0	0		1.68457	0	0
314		21.0745	3.49571	0.165874	13.1901	2.6029	0.197338	6	1.05279	0.175465	2	1	0.295047	2.15364	0		0	0.5		2.27906	0	0	4.22894	0	0	5.06148	0	0	0	0		1.15046	0.469312	0.407936
315	SRS4 (I-helix)	33.9876	2.05508	0.0604655	13.8679	3.0676	0.221202	6.67914	1.27116	0.190318	4.18541	1.23489	0.12367	0	0	0	0	0		1.90091	0	0	0	0		0	0		0	0.455052		2.35443	0	0
316		25.4994	5.07442	0.199002	11.7452	4.7588	0.405169	4.4915	3.33077	0.741571	3.69534	0.457003		2.15364	0	0	0	0		0	0		0	0		1.8029	2.49077	1.38153	0	0		1.31616	0.446386	0.339157
317		11.0403	8.16111	0.739214	3.22444	5.2761	1.63628	1.73181	1.84253	1.06393	0	1.6703	0.451042	1.07682	0	0	0	0		0	0		0	0.547683		2.87447	1.76384	0.613622	0	0		0	0
318		48.2506	2.91092	0.0603292	10.2546	0.828646	0.0808076	3.37132	0	0	1.81409	0.818233	0.332495	4.85283	0	0	3.15196	0	0	0	0		0	0		0	0		0	0		0	0
319		20.4401	10.1367	0.495923	15.9198	4.43065	0.27831	6.17109	1.94008	0.314382	5.63632	1.87405	0.0863599	6.94145	0	0	1.25166	0	0	0	0		0	0		3.26919	0.671055	0.205267	1.71357	0.413835	0.241505	1.26821	0.452184	0.356553
320		20.3672	2.54571	0.12499	19.6208	4.07651	0.207765	9.39375	3.63844	0.387326	6.99015	0.603668	0.490348	1.76329	0	0	0	0		4.2272	0	0	5.98276	0	0	3.64396	0.649961	0.178367	0.852671	0	0	0	0
321		29.0534	16.8993	0.581663	17.0771	3.02815	0.177322	7	0	0	5.07938	2.49067	0.134326	3	0	0	1	0	0	2.9764	0.548134	0.18416	0	0.580195		9	0	0	0.597546	0.704741	1.17939	2	0	0
322		27.4623	3.57046	0.130013	14.5472	0.749345	0.0515112	7	0	0	5.56498	0.747522	0.324934	2	0	0	1	0	0	3.6053	0	0	1.16039	0	0	7	0.5	0.0714286	1	0	0	1	0	0
323		26.4867	0.538385	0.0203266	19.7313	5.93831	0.300959	10	3.00331	0.300331	5.87857	1.91015	0.112523	4	0	0	0	0		3.6053	0	0	1.16039	0	0	7	0	0	0	0		1	0	0
324		26.1207	2.28308	0.0874052	13.2964	0.494489	0.0371897	9	0	0	4.29569	0.483364	0	1	0	0	0	0		0	0		0	0		7	0	0	1	0	0	2	0	0
325		39.3851	2.94129	0.0746803	27.1278	0	0	12.389	0	0	8.09	0	0.25	4.8242	0	0	0	0		6.28229	0	0	6.03172	0	0	4.79352	0	0	1.83467	0	0	2.2059	0	0
326		12.8297	2.8023	0.218423	10	1.51893	0.151893	4	0.503623	0.125906	2	0.5	0.271186	3	0	0	0	0		2.40353	0	0	0	0		2	0.506178	0.253089	0	0		2	0	0
327		28.6109	9.24311	0.323063	13.2684	3.52124	0.265385	4	2.05865	0.514663	5.37725	1.45824	0.253554	4	0	0	0	0		2.40353	0	0	0	0		3	0.535138	0.178379	1	0	0	2	0	0
328		40.6849	7.29427	0.179287	15	2.51229	0.167486	6	1.00205	0.167008	6	1.52133	0	4	0		1	0	0	1.20177	0	0	1.16039	1.16039	1	5	0	0	1	0.506206	0.506206	2	0	0
329		35.4005	15.0494	0.425119	10.5897	6.04618	0.570948	7.8126	4.84315	0.619916	2.46357	0	2.17279	0	0	0.253613	4.10239	0	0	6.28229	0	0	0	0		2	0.5	0.25	0	0.475124		1	0	0
330		28.5739	3.55406	0.124381	7.99652	8.0307	1.00427	4	4.09608	1.02402	1.99881	4.34299	0.717402	2	0.507225	0	0	0		3.6053	0	0	1.16039	0	0	2.25431	0.782348	0.347045	1	0	0	2	0	0
331		16.3442	17.0916	1.04573	14.5877	8.27314	0.56713	8.25016	4.32298	0.523987	2.59088	1.8587	0.0756869	3	0	0.490528	0	0		2.72059	0	0	2.16234	1.81953	0.841462	2	0.5	0.25	2	0	0	2.27419	1.06818	0.469697
332		26.6982	5.46651	0.204752	7.58138	1.3048	0.172106	1.88251	0	0	5.74823	0.435066		1.7399	0.853469		1.59754	0	0	4.45756	0	0	2.78708	0	0	0	0		0	0		1.77647	0	0
333		0	0		0	0		0	0		0	0	0.250384	0	0	1.43254	0	0		0	0		0	0		0	0		0	0		0	0
334		21.3596	5.65515	0.264759	10.0609	5.49795	0.546467	2	2.00123	1.00062	6	1.5023	0.0971061	1.04001	1.48986	0	1	0	0	1.20177	1.46644	1.22024	2.27471	0.568678	0.25	0	0.671145		0	0.544781		2	0.504707	0.252353
335		26.4881	6.52739	0.246427	22.0697	1.72289	0.0780659	6.65094	1.05001	0.157874	6.20533	0.602575	0.334642	4.87587	0		0.655183	0	0	1.60079	0	0	1.53583	1.50509	0.979985	0.832854	0.555769	0.667306	1.02351	0.597256	0.583534	1.50556	0	0
336		17.2911	5.69843	0.329558	7	4.09592	0.585131	4	1.52964	0.38241	3	1.00393	0.0812915	0	1.69117	0	1	0.52817	0.52817	2.40353	0	0	3.14423	1.51994	0.483407	4	0.50084	0.12521	0	0		2	0	0
337		16.975	0.456763	0.0269079	14.1208	0.445318	0.0315363	5.22884	0	0	5.42867	0.441305	0.214161	3.55055	0	0	1.55656	0	0	2.09744	0	0	2.69236	0.472593	0.175532	3.3132	1.87848	0.566971	0	0		0	0
338		26.3791	1.29031	0.0489142	17.4601	1.3285	0.0760877	8.19661	0.815943	0.0995465	2.55646	0.547495		4.56542	0		1.84022	0	0	1.83918	0	0	3.95167	0	0	1.71974	0	0	0	0		0	0
339		29.6587	2.26558	0.0763884	7.87964	1.78795	0.226908	9.34241	1.33446	0.142838	0	0.441983	0.101033	0	0	0	0	0		0.838072	0.789591	0.942152	0	0		4.06569	2.09041	0.51416	0	0		1.55286	0	0
340		24.4931	1.2416	0.050692	12.9152	0.407263	0.0315336	5.38796	0	0	3.97618	0.401727	0.0647868	1.76223	0	0	0	0.421984		4.36492	0	0	0	0		0	0		1.83467	0	0	0	0
341		29.5435	6.65496	0.22526	17.6164	2.48687	0.141168	3.36899	2.11546	0.627921	6.14508	0.39812	0	3.42532	0	0	0	0.850908		4.22216	0	0	0	0		4.79352	0	0	1.83467	0	0	0	0
342		17.8275	2.28877	0.128384	13	0	0	4	0	0	5	0	1.14032	4	0	0.125483	1	0	0	2.40353	0	0	3.48117	0	0	1.0023	0.999482	0.99719	1	0	0	1	0	0
343		27.1809	23.6032	0.868376	15.1297	10.303	0.680978	8.14368	5.50666	0.676189	2.94427	3.35741	0.769218	3.7445	0.46987	0	0	0		4.36604	0.496346	0.113683	0	2.56225		3.73589	1.71483	0.459014	1	0	0	0	0.870594
344		35.9812	9.36238	0.260202	11.1243	4.51125	0.405531	7.20651	2.96719	0.411737	1.99851	1.53729	0	2	0	0.65519	0	0		2.40353	0	0	4.74277	0.57407	0.121041	3.23247	2.64254	0.817498	0	0		1.1421	1.40748	1.23235
345		16.9329	3.48465	0.205792	18.29	1.1094	0.0606559	9.3754	0	0	5.06578	0	0.884843	1.79434	1.17563	0.25287	0	0		0	1.0183		1.16039	0	0	2.02555	1.4906	0.735897	0	0.478409		0.704415	0	0
346		26.4042	13.9302	0.527577	17.9021	7.69209	0.429675	10.4	3.05705	0.293947	3.67765	3.25414		3.76535	0.952145	0	0	0		4.34349	0	0	2.97404	0	0	2.90552	2.57672	0.886838	0.795783	1.12276	1.41089	1.60405	0.897528	0.559537
347		19.1088	3.8196	0.199887	11.5742	1.33478	0.115324	5.58997	1.33782	0.239324	0	0	0.333333	3.84718	0	0	1.59934	0	0	6.57188	0	0	4.98938	1.39433	0.279458	0	0.844604		2.17343	0	0	1.78723	0	0
348		10.9612	3.00731	0.274361	14	1	0.0714286	8	0	0	3	1	0.223837	3	0	0.244036	4	0	0	2.40353	0	0	3.45622	1.16459	0.336956	0	0.521945		1	0	0	0.992471	1.02008	1.02782
349		23.8987	7.94354	0.332383	20.1687	2.26713	0.112409	10.7741	1.33565	0.123968	4.59366	1.02823	0.117622	2.68138	0.654353	0	0	0.575861		0	0		0	0		3.55431	1.60034	0.450252	0	0.438362		1.19041	0	0
350		12.8003	16.9781	1.32638	16.8284	2.27335	0.13509	9.2434	2.74906	0.297408	3.7865	0.445376	0	3.58418	0	0	0	0.571236		2.28674	0	0	0	1.5846		3.50629	2.48917	0.709915	0	0.442804		0	0
351		24.3622	0	0	12.2579	0	0	8.61064	0	0	1.79734	0	0.0621756	1.80271	0	0.242197	0	0		4.34349	0	0	0	0		0	0		0	0		0	0
352		29.5651	3.94745	0.133517	22.5097	3.44546	0.153065	9.07367	2.53357	0.279222	7.02783	0.436959	0.104371	2.04296	0.494798		0	0		4.68379	0	0	2.7195	2.70434	0.994429	0.669893	1.55306	2.31837	0	0		1.41189	0	0
353		31.6498	4.62555	0.146148	15.8074	5.41923	0.342829	6.7526	3.34179	0.49489	7.7287	0.806653	0.993201	0	1.31384		3.14118	0	0	0	0.490619		0	0		4.63899	0.359805	0.0775611	0	0		0	0
354		30.1191	17.383	0.577143	8.47361	12.8138	1.5122	6.40526	6.52963	1.01942	2.99064	2.97031	0.399125	0	1.80158		0	0.566049		2.40353	1.45195	0.604091	2.32078	0	0	5.12012	0.990116	0.193378	1	0.577489	0.577489	2.43069	1.11019	0.456737
355		33.6546	8.0118	0.238059	17.0607	2.99467	0.175531	9.0688	0.996221	0.109851	5.00731	1.99854	0.294415	0	0	0	0.338344	1.82042	5.38037	2.41596	1.19868	0.496152	2.37139	1.14814	0.484164	4	0	0	0	0.487028		2.04339	0.989493	0.48424
356		29.74	8.96414	0.301417	22.3326	5.6448	0.25276	10.9986	4.78292	0.434865	5.06323	1.49069	0.105107	2	0	0	0	0		2.40353	0	0	4.05497	0	0	3.1057	0	0	0	0		0	0
357		23.9357	3.08442	0.128863	14.0473	1.0775	0.0767054	7.01427	0.544768	0.0776657	5.03195	0.528894	0.411168	2	0	0	0	0		1.20177	0	0	2.70332	0	0	5.17616	0	0	0	0		1	0	0
358		35.4088	11.0204	0.311233	15.2736	7.55434	0.494602	5.15689	4.86944	0.944259	6.35529	2.61309	1.12919	4.07632	0	0	0	0.421984		2.28029	0.52872	0.231865	4.14171	3.53949	0.854595	4.53209	4.98188	1.09925	0	0		0	0
359		27.3723	17.9373	0.655308	14.1704	11.1564	0.787302	5.13288	5.42436	1.05679	4.8043	5.42496	0.0910568	1.59968	0	0.375959	0	0.460894		2.14313	1.06508	0.496974	1.4526	1.9594	1.34889	3.6587	3.93711	1.0761	1.83467	0.407342	0.222025	0	0
360		26.9885	3.83485	0.142092	17.6586	1.58726	0.0898863	6.56641	0.51353	0.0782056	6.73836	0.613574	0.464155	1.32295	0.497376	0.087573	1.2254	0	0	1.43694	0	0	2.18256	0	0	5.22037	0	0	0	0		1.11565	0.475362	0.426087
361		27.7987	11.1877	0.402453	17.4835	4.37062	0.249985	8.36548	1.91253	0.228621	3.92018	1.81957	0.25	6.13968	0.53767	0.165869	0.846155	0.549999	0.649998	1.90624	0.691019	0.362504	2.60383	0	0	0.693415	1.14846	1.65624	0.729538	0	0	2	0.5	0.25
362		27.704	4.5586	0.164547	15.0052	2.49957	0.16658	7.00347	0.999752	0.142751	4	1	0.953928	3.00961	0.499203	0.0641872	1	0	0	3.74696	0.589735	0.15739	1.35166	0.675829	0.5	2.07047	1.03523	0.5	1	0	0	0	0.4837
363		18.9369	12.8156	0.676754	12.2179	7.78382	0.637086	4.67595	5.00098	1.06951	2.54254	2.4254	0.212766	6.5332	0.419348		0	0.963631		2.28674	0	0	0	0		3.45115	0.494304	0.143229	2.02144	0.470083	0.232549	1.85334	0.871773	0.47038
364		17.1713	0	0	1.96276	0.434497	0.22137	0	0		2.0229	0.430404	0.287941	0	0	0.847488	0	0		2.28674	0	0	3.20665	0	0	2.39229	0	0	0	0		1.69424	0	0
365		20.8906	6.69648	0.320549	17.4959	6.60662	0.377609	6.0725	2.19591	0.361616	6.57471	1.89313	0.042905	2	1.69498	0	3	0	0	1.20177	0	0	2.70332	0	0	4.28961	3.64545	0.849833	2	0	0	1.06926	0.983975	0.920242
366		34.603	0	0	16.3448	0.408419	0.0249876	3.57934	0	0	9.43577	0.404842	0.614319	1.61071	0		0	0		2.19724	0	0	0	0		0	0		0	0		0	0
367		25.0865	8.78759	0.350291	8.66901	12.5395	1.44647	4.70767	7.91303	1.68088	4.0589	2.49346	0.751706	0	0.967568	0	2.34571	0.616445	0.262797	3.59421	0	0	0	1.71386		3.30492	1.36128	0.411896	1.01984	0.495184	0.485551	0	0.444032
368		36.6573	25.2905	0.689918	9.87835	5.56487	0.563341	4.10301	3.53774	0.862231	1.99976	1.50323	0.217724	4.0004	0	0	3.15896	1.3975	0.442392	2.40353	0	0	5.58799	0.698499	0.125	3.1057	2.07047	0.666667	0	0.489729		1.10776	0.499319	0.450746
369		39.7109	3.34486	0.0842304	12.8438	3.0317	0.236045	7.4057	2.66277	0.359557	1.86433	0.405908	0.2517	1.66364	0		0	0		2.19508	0.493207	0.224687	5.83394	2.77063	0.474916	5.95666	2.97184	0.498911	0	0.410114		2.35443	0	0
370		23.7619	1.57197	0.066155	7.8078	0.507245	0.0649665	5.70301	0	0	1.99784	0.502856	0	0	0	0	1	0	0	1.8703	0	0	2.50222	0	0	2.94968	1.06336	0.360499	0.971773	0.524128	0.539353	1.50936	0	0
371		27.7898	2.04851	0.0737145	12.0818	2.49517	0.206524	6.08287	2.48719	0.408885	3.00448	0	0	3	0		0	0		3.6053	0	0	1.2565	0.638415	0.50809	5.17616	0	0	0	0		1.04705	0.978027	0.934082
372		30.1608	0.519224	0.0172152	10.9828	0	0	8.57099	0	0	2.06185	0	0.374488	0	0	0	0	0		4.1541	0	0	0	0.62077		4.93804	0	0	0	0		2.19156	0	0
373		36.7108	6.30866	0.171847	16.1309	2.73461	0.169526	4.993	1.36433	0.273249	3.67031	1.37449	0.728517	3.54065	0	0.249565	1.18978	0.463069	0.389207	2.86119	0	0	1.66927	1.02484	0.613943	0	0		0	0		1	0	0
374		12.3074	4.93887	0.401294	14.802	5.25912	0.355298	7.27149	2.91889	0.401415	1.49374	1.08822	0	3.91101	0.976049	0	0	0		0	0		0	0.526629		0	1.2472		0	0.495451		1.77647	0	0
375		23.9218	1.56212	0.0653014	7	1	0.142857	4	1	0.25	3	0	0.114402	1	0	0.314115	0	0		0	0		3.97786	0.621864	0.156331	2.07047	0	0	0	0		2	0	0
376		27.0718	5.88997	0.217568	15.5137	2.96227	0.190945	5.48056	0.688416	0.12561	3.9137	0.447735	0.233478	5.9114	1.85686	0	1	0	0	1.20177	0	0	1.59802	1.15176	0.720743	2.07047	1.55285	0.75	0	0		0	0
377		41.1717	5.32105	0.12924	15.5073	3.24993	0.209574	10.6563	0.865108	0.0811829	5.28306	1.23348	0	1	0	0	1	0	0	1.17725	0.607206	0.515783	2.53996	0.63499	0.25	0	1.36385		1.83467	0	0	1.18651	0.463565	0.390695
378	K-helix	32.2791	2.75241	0.085269	16.3924	0.450065	0.0274557	8.84841	0.449521	0.0508025	3.96329	0	0	3.58704	0	0	0	0		4.34349	0	0	3.01227	0.535621	0.177813	0	0		0	0		1.77647	0	0
379		27.8586	1.33198	0.047812	7.63204	0	0	3.74986	0	0	1.99007	0	1	1.78031	0		0	0		0	0		0	1.07323		0	0		0	0		1.68457	0	0
380		27.3808	4.20988	0.153753	7	4.52782	0.646832	6	2.02507	0.337512	1	1	0.512037	0	1	0	1	0	0	2.40353	0	0	5.07992	0	0	3.1057	0	0	1	0.533924	0.533924	2	0	0
381		26.0186	3.81791	0.146738	13.8456	4.14072	0.299064	6.01823	2.00242	0.332725	4.91654	2.51745	0.071077	1.76223	0	0	0	0.439933		2.4486	0	0	2.38904	0	0	1.74745	0	0	0	0		1.79138	0.548671	0.306285
382		18.9044	1.9172	0.101415	22.8623	0	0	12.0324	0	0	6.94675	0.493755	0	1.99602	0	0.32482	0	0		1.50655	0	0	2.47804	0	0	5.35375	0	0	0	0		0	0
383		26.0295	4.6988	0.180518	14.1512	2.07987	0.146974	3.86127	0.509147	0.13186	3.56107	0	0	3.4719	1.12775	0	0	0		1.3457	1.1766	0.874336	4.82798	0	0	3.52132	0	0	0.852671	0	0	0	0
384	SRS5	26.3582	0.412552	0.0156518	11.15	0	0	5.38584	0	0	2.07063	0	0	3.5133	0	0	1.57618	0	0	0	0		0	0		4.26961	1.53695	0.359974	0	0		0	0
385		40.5455	3.05049	0.0752361	10	0	0	7	0	0	2	0	0.0833333	2	0		0	0		2.40353	0	0	1.397	0	0	4.14093	0	0	2	0	0	1	0	0
386		29.8905	14.705	0.491963	15	1.00422	0.0669479	8	0.504589	0.0630736	6	0.5	0.223107	0	0	0	0	0		2.40353	0	0	1.397	0.698499	0.5	4.14093	1.03523	0.25	1	0	0	1	0	0
387		31.1403	13.3673	0.42926	13.8164	3.60053	0.260599	5.26534	1.3391	0.254323	5.64642	1.25975	0.501228	1.63726	0	0	0	0		2.40353	0	0	1.45338	1.37336	0.944944	2.07047	0.517616	0.25	1.11809	0.47492	0.42476	2	0	0
388		17.7961	1.77177	0.0995595	14	2.00144	0.14296	7	0	0	4	2.00491	0.411077	2	0	0	1	0	0	0	0		0	0		4.134	1.0361	0.250629	0	0.5		1	0	0
389		30.5358	19.0863	0.625046	17.4142	4.56034	0.261874	7.36669	1.62663	0.220809	5.83385	2.39816	1.82949	3	0	0	0	0.381783		4.54383	0	0	1.1872	0	0	2.98406	0.780401	0.261523	1.02447	0.494098	0.482295	1.27836	0.914926	0.715705
390		30.5213	11.0432	0.361821	12.7558	4.05061	0.317551	6.60004	2.07692	0.314683	1.06213	1.94316	0.625	4	0	0	0	0		4.22216	0	0	1.397	0	0	1.03523	0.518562	0.500914	0	0		0	0
391		39.5598	13.0747	0.330505	19.4881	9.01127	0.462398	7.26066	6.50208	0.895522	4	2.5		5.71368	0		3.57284	0.742432	0.207799	3.6053	0	0	2.79399	0	0	0	0.791298		1.47163	0.932256	0.633487	0.72154	1.52725	2.11665
392		26.2205	0.527713	0.020126	7.67576	0	0	7.41384	0	0	0	0	1.20239	0	0	0	1.22831	0	0	2.91486	0	0	4.98481	0	0	5.16164	0	0	0	0		0	0
393		33.4026	5.79143	0.173382	11.2644	4.0081	0.355819	5.59789	1.78377	0.318651	1.84476	2.21811	0.334123	3.81836	0	0	0	0		0	0		2.74614	0	0	1.11614	1.53195	1.37254	0	0		0	1.36158
394		15.5349	3.81646	0.24567	14.3199	4.19993	0.293293	3.06784	2.93538	0.956821	5.78376	1.93249	2.07005	4.85832	0	0.634776	3	0	0	2.40353	0	0	1.397	0	0	2.07047	1.10927	0.535759	0	0		2	1.0168	0.508399
395		33.9622	12.249	0.360665	19.8903	13.3289	0.670124	7.34386	5.49704	0.748522	1.55087	3.21039	0.993734	4.84935	3.07825		0	0.424594		4.80121	1.04507	0.217668	0	1.23463		2.03172	3.03559	1.4941	0	0.487028		1.07317	0.967034	0.901102
396		21.0693	7.18632	0.341081	9.87573	7.62667	0.772264	7.53597	2.80492	0.372205	2.89275	2.87462	0.749623	0	1.39711	0	0	0.459859		2.40512	0	0	0	0.583925		1.13931	1.51476	1.32954	0	0.442804		1.79356	0	0
397		39.9718	18.5063	0.462984	19.4833	7.54061	0.387031	3.43519	3.03159	0.882509	6.54917	4.9094	0.0807892	5.3224	0	0	0	0		2.25307	1.3657	0.606149	1.77374	1.94807	1.09829	2.31664	2.07775	0.896879	1.89025	0.4047	0.214099	2.3944	0.671782	0.280564
398		36.335	7.25278	0.199609	15.9411	0.916424	0.057488	5.3128	0.459372	0.086465	5.63949	0.45561	0.453732	1.59307	0		3.13316	0	0	0	0		0	1.12323		5.97688	1.81479	0.303636	0	0		0.705632	0.654617	0.927704
399		31.8083	20.1158	0.632405	11.6203	6.31434	0.543388	6.10197	3.21897	0.527529	5.75677	2.61203	0.400405	0	0	0.202459	2	0.5	0.25	4.41559	0	0	1.38346	2.10557	1.52195	1.43604	4.05348	2.82269	0	0.420688		1.78046	0.875155	0.491534
400		23.794	9.6785	0.406762	14.0482	4.19424	0.29856	8.46043	1.18286	0.139811	3.49747	1.40041	0.229201	2.31309	0.468306	0.238038	0	0		3.6053	0	0	1.397	0	0	4.21098	1.54004	0.36572	0	0		1.66919	1.20255	0.720436
401		22.078	26.2649	1.18964	17.3858	9.10948	0.523961	4.82929	5.56981	1.15334	6.25022	1.43255	0.490064	5.22718	1.24427	0	0	0		2.09659	0.496753	0.236933	0	2.64902		5.17337	1.04113	0.201249	1	0.519093	0.519093	1	0	0
402		21.4895	4.80571	0.223631	20.8331	5.65447	0.271418	9.39247	1.98813	0.211673	6.34581	3.10985	0	6	0	0.307318	0	0		1.20177	0	0	4.19099	0	0	6.33543	0.514046	0.0811383	0	0		0.562389	0.724346	1.28798
403		31.5775	2.01572	0.0638342	12.5811	1.94788	0.154825	5.37043	1.42977	0.26623	3.73716	0	0.685207	1.61743	0.497066	0	1.58545	0.885335	0.558412	2.20584	0	0	0	0		4.95209	0.421227	0.0850604	0	0		2.3287	0.470756	0.202154
404		24.113	15.2417	0.632095	10.243	7.30409	0.713085	5.40408	5.89527	1.09089	3.45896	2.3701	0.744872	1	0	0.378075	0	0		2.09376	0	0	0	0		4.2834	2.0366	0.475462	1.83467	0	0	0	0.877743
405		23.8176	1.86127	0.0781466	10.9391	1.83717	0.167946	6.04914	0.460101	0.0760606	1.22834	0.914957	0.383423	1.21499	0.459358	0	1.16203	0	0	2.87494	0.555352	0.19317	2.79399	0	0	3.42146	0.692132	0.202291	1.19521	0	0	2.10733	0.679487	0.32244
406		20.3611	2.55044	0.12526	13.5674	3.74625	0.27612	8.00838	2.00322	0.25014	4.54608	1.74307	0.894297	1	0	0	2	0	0	4.80707	0	0	2.79399	0	0	3.1057	0	0	0	0		1.95862	0.513517	0.262183
407		24.384	7.06763	0.289847	15.4426	8.41863	0.545158	6.10526	5.01488	0.821402	3.05335	2.7306	0.19875	5.39127	0		2	0	0	3.76883	1.18659	0.314844	2.79399	0	0	2.07047	4.14093	2	0	0		0.557703	1.20276	2.15663
408		27.2108	13.1186	0.48211	12.2986	7.73991	0.629334	6.14285	3.34653	0.544783	8.08102	1.6061	0.340083	0	0	0	0	0		5.99466	2.0137	0.335916	4.19099	0	0	2.98751	2.91171	0.974626	0	0		0.89235	1.04185	1.16753
409		31.5596	3.56319	0.112903	11.4654	6.61051	0.57656	6.12023	4.62195	0.755191	3.62062	1.23131	0.440805	2	0	0	1	0	0	2.40353	0	0	1.397	0.703104	0.503297	4.14093	0.51875	0.125274	1	0	0	1.15046	0.469312	0.407936
410		36.6773	13.114	0.35755	16.4435	5.30076	0.322362	4.31138	3.11326	0.722101	4.82451	2.12667	0.0885788	5.05758	0	0.775135	1.22998	0	0	2.31208	0.852901	0.368889	0	0		3.168	2.60174	0.821256	0.624493	0.682019	1.09212	0	1.35273
411		33.0692	9.25708	0.27993	14.1074	5.1117	0.362343	6.34432	2.10347	0.331552	6.95285	0.615875	0.145278	1.62343	1.25838	0.171763	0	0		1.4638	0	0	0	0		1.03523	0	0	1.53039	0	0	1.07971	0.4822	0.446601
412		29.6145	6.8953	0.232835	16.7818	2.59535	0.154653	8.3698	0.851109	0.101688	5.61896	0.81631	0.294164	2.94066	0.505096	0	0	0.377846		1.61058	1.64861	1.02362	0	0		4.64974	0.37274	0.0801636	0	0		0	0.818892
413		24.784	6.57085	0.265124	14.0965	1.44491	0.102501	9	0	0	2.53306	0.745137	0	1.76282	0	0	2.03331	0.495937	0.243906	1.51991	0	0	2.39066	0	0	0	0.776891		0	0.467692		1.13762	0.471482	0.414445
414		33.1191	0.421387	0.0127234	7.23326	0	0	0	0		5.77178	0	1.26363	1.59334	0	0	1.5862	0	0	4.22216	0.988809	0.234195	0	0.862662		0	0.370666		0	0		2.3287	0	0
415		30.8548	8.31324	0.269431	15.245	6.90221	0.452751	0	2.07029		3.63789	4.59697		7	0		2	0	0	3.6053	0.600883	0.166667	1.1899	1.19806	1.00686	2.87787	2.26969	0.78867	0.860753	0.629112	0.730886	0.93812	0.517053	0.551158
416		0	1.13984		0	0		0	0		0	0	0.20641	0	0	0.762976	0	0		0	1.28602		0	0		0	0.861359		0	0.51067		0	1.05369
417		33.5957	5.73991	0.170852	17.1887	4.06097	0.236258	8	1.52078	0.190097	5	1.03205	0.248258	3.26738	2.49293	0	2	0.5	0.25	2.40353	0	0	3.53939	1.813	0.512235	0	1.03523		0	0		2	0.5847	0.29235
418		25.9162	4.51739	0.174307	15.7535	3.29395	0.209094	5.57634	1.21852	0.218515	4.69473	1.16551	0.270917	3	0		1.44761	0	0	1.50945	0	0	1.27132	0.71871	0.565325	2.32285	0	0	1.5026	0	0	0.744677	1.07362	1.44173
419		29.063	10.3634	0.356583	11.121	2.70538	0.243268	9	1.07386	0.119318	2	0.541835	0	0	1.08086	0	3	0	0	3.6053	0	0	1.397	0	0	4.14093	0	0	0	0.894951		1.55167	1.31251	0.845872
420		27.7937	2.41758	0.0869831	16.7466	0	0	8.46931	0	0	4.52652	0	0.200211	1.34186	0	0	0	0		4.35746	0	0	1.397	0	0	2.05531	0	0	0	0		0	0
421		41.3891	2.07296	0.0500846	18.2965	1.22277	0.0668309	8.86951	0.820927	0.0925561	3.99649	0.80014	0.200157	3.48447	0	0.0707191	3.1442	0	0	6.11053	0	0	0	0		0	0		0	0		0	0
422		35.5909	2.55073	0.071668	21.1339	3.51254	0.166204	7.07233	2.01458	0.284853	5	1.00078	1.57758	7.07927	0.50064	0	2	1.66371	0.831857	2.49126	1.82387	0.732108	0	0.698499		1.03523	1.03523	1	0	0		0	0
423		31.1486	11.3909	0.365696	12.3483	6.42109	0.519997	6.78894	3.62214	0.533536	1.77492	2.80006	0.312171	2.09031	0	0	1.55259	0	0	2.19824	1.48942	0.677549	0	2.07328		7.34959	2.57856	0.350844	0	0.440462		0	1.05986
424		37.0406	14.6496	0.395501	20.1691	8.72184	0.432435	8.88691	5.28744	0.594969	5.98443	1.86817		5.50374	0		1.5972	0	0	4.22216	0	0	0	2.21672		0	4.37075		1.83467	0.435526	0.237387	0	0
425		0	0		0	0		0	0		0	0		0	0		0	0		0	0		0	0		0	0		0	0		0	0
426		0	nan		0	nan		0	nan		0	nan	0.461903	0	nan	1.25002	0	nan		0	nan		2.70855	1.35427	0.5	0	0		0	nan		0	nan
427		39.1248	10.2474	0.261916	15.5433	10.0828	0.648689	9.34177	5.6107	0.600604	3.90504	1.80375	0.451273	1.8214	2.27679	0.45017	0	0		2.19824	0.492838	0.224196	2.79399	0	0	2.37513	1.23959	0.521904	0	0		0	0.564929
428		31.9957	12.7739	0.399238	20.4661	7.05209	0.344575	8.90563	1.64204	0.184383	7.00202	3.15982	0	4.53869	2.04318		0	0.424594		4.20245	0.996415	0.237103	9.51909	0.530595	0.0557401	4.59217	2.49384	0.543064	1.46549	0.431475	0.294424	0	0.528246
429		24.7642	2.02586	0.081806	10.1942	0.509711	0.05	6	0.5	0.0833333	4.13861	0	0	0	0	2.13797	0	0		3.6053	1.20177	0.333333	0	0		3.02925	0.996601	0.328993	0	0		1.3071	0	0
430		18.4322	6.28819	0.341153	12.4176	5.90415	0.475465	6.54971	2.97911	0.454846	4.60074	0	0.639264	1.38524	2.96161	0	0.777998	0	0	3.50779	1.02829	0.293144	0	1.50984		5.43866	1.05812	0.194555	0	0		0.993955	0	0
431		27.1048	5.07254	0.187146	14.7647	3.60553	0.2442	8.59709	2.75634	0.320612	2.03323	1.29977	0	2.20263	0	0	0	0		1.50735	0.570007	0.378151	0	1.30114		1.51843	4.03255	2.65573	0	0.448762		0	0
432		40.9334	0	0	14.0408	0	0	5.0815	0	0	1.90615	0	1.99684	5.24189	0	0	0	0		2.09376	0.590777	0.282161	0	0		0	0		0	0		3.02264	0	0
433		33.9858	22.2608	0.655003	12.4119	10.5964	0.853727	7.98931	4.71927	0.590698	2.99389	5.97831	0.25	1.06504	0	0	1.22553	0.478333	0.390306	0	1.4723		1.12286	0	0	5.88807	0	0	0	0.567941		1.02015	0	0
434	ERR-triad	31.5596	0	0	13.2525	1.01942	0.0769231	6	0.5	0.0833333	2.06931	0.517327	0	4.26017	0	0	0	0		3.6053	0	0	0	0		3.1057	0	0	0	0		0	0
435		28.729	5.01418	0.174534	19.2306	0	0	11.0237	0	0	4.1645	0	0	1.87909	0	0	0	0		4.33317	0.530978	0.122538	0	0		2.43581	0.428805	0.176042	0	0		0.357241	1.62239	4.54145
436		19.0467	0	0	17.931	0	0	7.80445	0	0	5.32041	0	0	2.63149	0	0	2.43955	0	0	1.48139	0	0	3.91494	0	0	5.35137	0	0	1.31444	0	0	2.62448	0	0
437		28.4632	0	0	20.3884	0	0	5.13301	0	0	4.24492	0	0.0872469	5.52267	0	0.22361	0	0		0	0		0	0		0	0		0	0		0	0
438		32.7411	17.6596	0.539371	16.2202	3.31311	0.204258	5.99631	1.96296	0.327361	7.64702	0.667179	1.64513	2.95274	0.660263	0.352941	0	0		2.07795	0	0	1.23112	0.748954	0.60835	12.3563	1.06497	0.086189	0	0		0	0.501423
439		40.9056	25.6871	0.62796	8.155	8.0785	0.990619	5.18676	4.08792	0.788146	1.82193	2.99731	0.739152	3.22195	1.13716	1.47824	1	0	0	3.27376	2.60973	0.797165	1.40309	2.08016	1.48256	4.14093	1.03523	0.25	0	0.5		0	1.30243
440		22.9099	15.8569	0.692143	14.0082	15.2723	1.09024	5.5214	7.46595	1.35219	5.5266	4.085	0.827645	1.55784	2.30286	0.495968	1.30892	1.7889	1.36669	2.92231	2.21387	0.757576	4.2773	0.69357	0.162152	0	0.5106		1.18111	0.928792	0.786375	3.02264	0	0
441		34.2124	20.032	0.58552	18.1878	15.3123	0.841898	6.19245	7.74868	1.25131	4.85256	4.01619	0.732748	4.35172	2.15831	0.492444	1.59754	0	0	4.1541	0	0	6.2922	1.63169	0.25932	3.65987	0.77323	0.211273	0	0.413827		1.3071	0.665172	0.508892
442		32.2652	21.7957	0.675519	18.2618	14.2642	0.781094	6.76039	5.47091	0.80926	7.46424	5.46941	0.278402	4.30375	2.11936		0	0		2.9774	1.27028	0.426641	4.51479	4.72329	1.04618	1.61066	4.328	2.6871	2.11977	0.87042	0.410621	0	0.632987
443		22.1094	23.3811	1.05752	22.4476	7.63578	0.340161	9.29491	4.66158	0.501519	12.0781	3.36256	0.791856	0	0	0	0	nan		0	nan		4.62081	0	0	0	nan		0.319356	1.47939	4.63241	0	nan
444		27.9442	23.0156	0.823626	19.5044	11.8552	0.607821	8.45167	6.99789	0.827989	6.82823	5.40697	1.36294	1.49205	0		0	nan		1.75501	0	0	0	2.48927		0	nan		0	0.490878		0	nan
445		34.7474	24.7778	0.713082	15.9557	16.9372	1.06152	8.59029	8.88785	1.03464	6.11528	8.33474	1.37838	0	1.56627	1	0	nan		0	0.784868		6.65483	2.12396	0.319161	0	nan		0	0.410114		0	nan
446		32.7012	15.6862	0.479683	13.1139	19.1337	1.45904	6.40068	7.71656	1.20558	5.17296	7.1303	1.33361	1.20402	1.20402	0.626996	0	nan		2.51912	0	0	7.54288	2.60621	0.345519	3.57314	2.31249	0.647186	0	0.828204		0	nan
447		31.3774	22.8235	0.727385	22.6529	18.0771	0.798005	10.7997	6.79457	0.629142	5.70916	7.61381	1.07497	4.89215	3.06736	0.552045	0	nan		1.76007	2.07451	1.17865	5.27688	3.93208	0.745153	4.89039	2.02444	0.413962	0	0.410114		0	nan
448		31.0343	27.0049	0.870164	20.7508	19.0593	0.918485	5.89235	7.78834	1.32177	7.66139	8.23575	0.633019	2.27485	1.25582		0	nan		4.39301	0.537226	0.122291	2.79399	2.0955	0.75	3.9594	3.68541	0.930801	1.90604	1.10142	0.577859	0	0
449		24.3228	19.8337	0.815437	18.6502	6.57167	0.352365	12.5364	2.04782	0.163349	5.855	3.70633	0	0	1.009		0	nan		2.8816	0.554857	0.192551	0	2.911		6.66649	1.08783	0.163178	0	0.5		1.2076	0.68163	0.564451
450		9.89276	2.8647	0.289576	13.9952	1.26602	0.0904609	11.895	1.24581	0.104734	1.89413	0	0.492497	0	0	0	0	nan		4.1541	0	0	0	0		2.94251	1.21535	0.41303	0	0.414747		2.58748	1.04784	0.404967
451		26.078	6.91763	0.265267	12.291	5.85971	0.476747	7.38565	3.19983	0.43325	3.13549	1.54422	0.11953	2.05865	0	0.383832	0	nan		3.6053	0	0	0	0		1.03523	0	0	1.25845	0.95054	0.755328	0	1.23663
452		17.9943	5.43423	0.301998	10.8477	3.28455	0.302787	3.52235	1.81549	0.51542	4.0644	0.485818	0	1.28484	0.493162	0	1.5585	0	0	1.37733	0	0	0	0		3.44262	1.19536	0.347225	1.35461	0.469237	0.346401	1.6628	0.608291	0.365824
453		32.9653	1.09871	0.0333292	21.4079	0	0	9	0	0	5.17327	0	0	4.26017	0	0	3.11144	0.491204	0.15787	2.40353	0	0	0	0		4.14093	0	0	0	0		1.3071	0	0
454		47.5877	3.8033	0.0799218	25.4627	1.53883	0.0604346	9.86922	0.986209	0.0999278	4.10421	0	0.110655	10.6122	0		0	0.339823		2.19107	0	0	0	1.17902		0	0.873231		0	0		0	1.20736
455		13.9731	8.6246	0.61723	10.5368	3.39005	0.321734	5.13399	2.51454	0.489783	3.80653	0.421211	0.111036	0	0.449174	0	0	0		4.1541	0	0	0	0		4.7501	0.746408	0.157135	0	0		3.02264	0	0
456		17.6582	6.68036	0.378316	15.8944	2.21164	0.139146	3.38473	1.84396	0.544789	3.80678	0.422691	0.357674	7.37788	0	0.922977	1.55783	0	0	4.3753	0	0	0	0		4.5671	2.2448	0.491516	0	0		0	0
457		15.9902	9.38253	0.586767	16.1648	8.10298	0.501274	5.11619	2.46165	0.481149	5.69089	2.03548	0.360747	4.02214	3.71234	0	0	0		2.19107	0	0	0	0		2.4659	1.30217	0.528068	0	0.414152		0	0.606237
458		28.1498	14.7801	0.525051	10.6153	3.56658	0.335984	4.83506	1.26469	0.261566	4.35117	1.56967	0.345031	1.06504	0	0	0	0		3.46715	0	0	0	1.24658		1.94475	1.7636	0.906852	0	0.887557		1.5229	1.28922	0.846555
459		16.2759	11.3411	0.6968	11.0149	1.49418	0.13565	4.91349	0	0	2.39913	0.827773	0	1.72342	0		0	0.368798		3.57294	0	0	0.621055	1.11742	1.79923	0	1.77295		1.36148	0	0	1.98791	0	0
460	heme-binding	22.6756	1.55869	0.0687386	9.1748	0	0	5	0	0	4.13861	0		0	0		0	0		2.40353	0	0	2.79399	0	0	7.24663	0	0	1	0	0	0	0
461		15.7903	0	0	8.73323	0	0	8.48338	0	0	0	0	0	0	0		0	0		4.04142	0	0	7.25547	0	0	9.90291	0	0	1.83467	0	0	0	0
462		21.6449	0.524176	0.0242171	12.2331	0	0	8	0	0	4.13861	0	0.272902	0	0	0	1	0	0	4.80707	0	0	0	0		3.1057	0	0	0	0		1.3071	0	0
463		17.8601	6.39689	0.358166	12.6469	4.60018	0.36374	5.33286	3.39408	0.636445	4.13861	1.12943	0	3.19513	0	0	0	0		2.09376	0	0	1.44115	1.39116	0.965311	0	0.392711		0	0.5		0	0
464		17.522	0	0	14.2719	0	0	5	0	0	4.13861	0	0	2.13009	0	0	2	0	0	3.6053	0	0	2.79399	0	0	4.35472	0	0	1	0	0	1.3071	0	0
465		22.0592	2.56297	0.116186	13.5085	0	0	8.36513	0	0	1.25989	0	0	3.84494	0	0	0	0		2.92548	0	0	1.11201	0	0	4.16448	0	0	0	0		0	0
466		18.1035	0	0	10.0004	0	0	4.91569	0	0	1.26112	0	0.452412	4.05351	0		0	0		0	0		1.1066	0	0	4.04621	0	0	0	0		1.50364	0	0
467		32.0457	18.7455	0.584962	15.5774	4.62594	0.296964	6.97471	1.86938	0.268022	4.36664	1.97552	0	0	0	0	3.13932	0	0	4.22216	0	0	8.156	0	0	5.4434	0.555583	0.102065	1	0	0	0	1.1841
468		37.7626	0	0	21.5773	0	0	10.4724	0	0	6.0693	0	0.25	3.43974	0	0	1.55131	0	0	2.20584	0	0	0	0		10.3437	0	0	1.93695	0	0	0	0
469		16.4913	0	0	6.08885	1.52221	0.25	3	1	0.333333	2.06931	0.517327	0	1.02966	0	0	2	0	0	1.20177	0	0	1.397	0	0	0	0		0	0		1.3071	0	0
470		18.6429	1.09968	0.0589865	17.2517	0	0	8	0	0	5.17327	0	0.624584	2.05932	0	0	1	0	0	2.40353	0	0	0	0		2.17736	0	0	0	0		1.3071	0	0
471		25.5659	10.6728	0.417464	11.2431	6.32451	0.562525	0	2.27739		4.61214	2.88067	0.960692	3.08898	0		1.56774	0	0	1.20177	0.600883	0.5	1.397	0	0	0	0.366077		0	0		0	0.483132
472		22.2179	9.31428	0.419223	9.21	6.24068	0.677598	5	1.50715	0.301431	3.56583	3.42566	0	0	0	0	3.17903	0	0	2.40353	0	0	0	1.60378		3.26604	0	0	0	1.27677		0	1.24594
473		30.683	4.91713	0.160256	12.3569	1.31146	0.106131	6.8602	1.29545	0.188835	4.77829	0	1	0.842826	0	0.166667	0	0		3.39908	0	0	1.18618	0	0	6.44577	0	0	0.92322	0	0	0	0
474		23.7063	1.03109	0.0434944	12.1777	3.04442	0.25	6	0	0	2.06931	2.06931		3.08898	0.514831	0	0	0		3.6053	0	0	1.397	0	0	2.17736	0	0	0	0.5		1.3071	0	0
475		29.875	1.30933	0.043827	14.3204	3.74466	0.261491	9.5045	1.94082	0.2042	0	1.08715	0.119492	2.05932	0	0.182866	0	0.426008		1.02052	0	0	0	0.476768		3.49021	1.37764	0.394716	1	0.5	0.5	1.78293	0.744519	0.417581
476		37.0131	12.8621	0.3475	18.8552	6.21691	0.329719	10.5131	2.12091	0.20174	4.09731	0.489598	0.17127	3.08898	0.56487	0	0	0		2.4364	0.596858	0.244976	2.54489	0	0	0	0.925087		0.90091	1.09146	1.2115	0	0
477		14.6534	16.6519	1.13638	14.6178	4.0999	0.280474	8.05146	3.31456	0.411672	4.48384	0.767946	0.428704	1.02966	0		3.15652	0	0	2.40353	0	0	0	0		3.26604	1.10167	0.337309	0	0.487028		1.3071	0	0
478		27.1199	5.97266	0.220231	15.4788	2.77358	0.179185	7.3278	0	0	4.15939	1.78315	0.374419	0	0.343531	0	1	0	0	3.04196	0.461342	0.151659	1.397	0	0	1.08868	0	0	0	0.973331		0.823636	0.888575	1.07884
479		34.8635	11.7551	0.337174	17.3215	3.03831	0.175407	9.05085	0.997199	0.110177	4.14289	1.55118	0.650684	4.11865	0	0	0	0		2.28685	0	0	0	0.578608		0	0		1	0	0	1.02736	0.829428	0.807339
480		22.6765	10.9147	0.481321	18.8292	8.49957	0.451403	10.1514	4.46669	0.440007	7.24752	4.71585	0.487839	1.02966	0	0.321503	3.14178	1.41747	0.451169	3.6053	0	0	1.397	0	0	7.62077	0	0	0	0.483423		0	0
481		33.4046	13.5127	0.404515	16.8436	8.91639	0.529365	6.94306	4.15106	0.597872	4.93482	2.4074	0.723366	5.27072	1.69455		0	1.47867		1.20177	0.611468	0.508807	0	0		2.48094	0.699328	0.28188	1.35216	0.442392	0.327175	1.3071	0.653549	0.5
482		22.3739	4.50386	0.2013	11.8034	4.13712	0.350504	8.13975	1.13823	0.139836	2.1201	1.53361	0.306407	0	0.513881		0	1.27963		3.39571	0	0	0	0		5.83256	1.16364	0.199508	0	0.401602		0	0.687473
483		18.8435	4.71319	0.250123	12.1777	5.6944	0.467609	8	2.07946	0.259933	5.17327	1.58512	0.37368	0	1.56555	0	1	0	0	4.80707	0	0	2.79399	0	0	3.26604	0	0	1	0.502853	0.502853	0	0
484		23.1601	19.6479	0.848354	11.1721	4.06636	0.363974	6	1.50444	0.250741	4.14836	1.55016	0.112871	1.02966	0	0.96787	2	0	0	2.00514	0	0	1.397	0	0	1.08868	0	0	0.946655	0	0	0	0
485		18.2966	6.80175	0.37175	12.2678	3.97146	0.323731	7.03327	1.97363	0.280614	6.48962	0.732487	0.194337	1.05245	1.01863	0.259378	0.919451	0.6107	0.664201	0	0		0	0.4731		4.00365	0	0	1.78221	0	0	0	0.501423
486		19.6239	5.23477	0.266755	13.3807	2.81143	0.210111	6.20929	0.911264	0.146758	2.46444	0.478932	0	3.67615	0.953512	0	4.1881	0	0	2.75722	1.694	0.614386	0	1.40806		0	0.546246		0	0		0.769314	0.911726	1.18512
487		30.0738	0.557451	0.0185361	23.3877	0.533907	0.0228285	8.66527	0.534703	0.0617065	7.59293	0		7.48525	0	0	0	0		4.34831	0	0	3.31232	0	0	0	0		2.02144	0	0	0	0
488		26.4943	0.473166	0.0178592	11.2906	0	0	8.93596	0	0	0	0	0	1.81641	0	0	1.56102	0	0	2.20584	0	0	0	0		0	0		0	0		1.56052	0.62791	0.402372
489		14.2005	0	0	17.4603	0	0	10.2207	0	0	3.80829	0		3.28815	0	0.494865	1.55285	0	0	2.09376	0.499622	0.238625	0	0		10.2909	0	0	0	0		3.02264	0	0
490		23.7645	8.13417	0.342282	8.78808	4.25193	0.48383	5.11058	2.15031	0.420757	0	0.843389		1.73461	0.858398	0	0	0		4.1541	0	0	0	0		10.125	2.36031	0.233118	0	0		2.22753	0	0
491		34.1369	6.27043	0.183685	23.1475	4.99321	0.215713	0	2.13526		0	2.58376	0.225881	4.81898	0	0	1.37099	0	0	0	0		0	0		0	0		0	0		0	0
492		34.4589	6.4145	0.18615	22.1499	2.34104	0.105691	10.4278	0.455172	0.04365	6.08421	1.37431	0.29383	6.28401	0	0	0	0.461698		2.42064	0.598767	0.247359	1.41841	4.19755	2.95934	2.64742	4.09288	1.54599	2.17343	0	0	1.83081	0.614945	0.335888
493		16.9682	7.19265	0.42389	12.7056	5.12124	0.403068	3.68265	3.20312	0.869788	5.24569	1.54134	0.699968	2.05932	0	0.565547	1	0	0	4.80707	0	0	2.79399	0	0	2.31023	3.33468	1.44344	0.898345	1.05997	1.17992	0	0
494		14.0889	26.9585	1.91345	19.8229	14.0484	0.708696	7.35566	5.38905	0.73264	6.51131	4.55771	0.328812	4.75051	2.68664	0.0789828	0	nan		2.00514	0	0	4.19099	0.698499	0.166667	4.52713	3.47555	0.767714	0	0		0	0
495		28.9134	12.8318	0.443801	20.3865	7.36852	0.36144	4.59183	4.35268	0.947918	5.34426	1.75726	0.546631	6.43657	0.508378	0.982927	0	nan		2.00514	0	0	4.19099	0	0	4.55458	4.78158	1.04984	0	0		0	0
496		33.0308	12.3611	0.374231	26.7203	12.8755	0.481863	14.5555	4.80524	0.330132	8.63437	4.71981	1.23159	2.11329	2.07721	0.583544	0	nan		3.6053	0	0	4.02795	0	0	3.1247	4.87477	1.56008	0	0.827971		0	0
497		14.9539	24.0949	1.61128	15.3925	19.0437	1.23721	5.04757	8.37958	1.66012	5.07916	6.25545	1.74812	5.5828	3.25781	0	0	nan		2.08758	0	0	0	nan		2.78673	3.35796	1.20498	1.9357	0	0	0	0
498		29.6794	6.53636	0.220232	10.3224	8.28414	0.80254	5.12486	4.51579	0.881155	2.10848	3.68587	0.963765	1.02966	0	0.732554	0	nan		0	nan		0	nan		5.20033	0.83338	0.160255	2.05528	0.830205	0.403937	0	0
499		17.9224	21.1693	1.18116	16.1377	13.4555	0.833792	8.42519	8.18619	0.971633	2.87691	2.77267	1.92584	2.09499	1.5347		0	nan		0	nan		0	nan		6.77854	2.5968	0.383092	0.518142	0.739157	1.42655	0	nan
500		16.3177	18.6109	1.14053	18.981	9.11327	0.480127	13.1292	5.26437	0.400967	2.09392	4.03257	0.268457	0	0.418934	0	0	nan		0	nan		0	nan		2.48035	4.76494	1.92107	0.51803	1.22862	2.37171	0	nan
501		8.97991	18.7863	2.09204	14.2961	6.29551	0.440365	7.49339	5.76279	0.76905	4.8456	1.30084	0.323584	2.50827	0	0.326385	0	nan		0	nan		0	nan		0	1.77521		1.01899	0.994738	0.976202	0	nan
502		27.3855	15.0911	0.551061	19.3333	11.395	0.589397	5.85755	8.62387	1.47227	5.03722	1.62996		4.18399	1.36559	0	0	nan		0	nan		0	nan		0	nan		0	0		0	nan
503		21.5645	25.4168	1.17864	9.4004	7.00089	0.744743	5.94397	4.80785	0.808862	0	2.24247	1.72056	3.08898	0		0	nan		0	nan		0	nan		0	nan		0	0		0	nan
504		0	10.2906		7.26746	13.0921	1.80147	6.61081	4.16337	0.629782	3.2196	5.53951		0	2.64542	0.0874918	0	nan		0	nan		0	nan		0	nan		0	nan		0	0
505		26.2659	24.0419	0.915329	12.8063	9.47597	0.739945	7.44629	5.83296	0.783338	0	2.10867	1.70157	4.96984	0.43482	0.166667	1.55755	0.45883	0.294585	4.1541	0.496309	0.119475	2.79399	0.698499	0.25	5.66333	7.27636	1.28482	0	0		0	0
506		32.8658	17.8786	0.543989	11.9117	15.8852	1.33358	4.97982	6.55495	1.3163	3.62428	6.16699	1.03871	3.08898	0.514831	0.115484	0	0		4.04142	0.999275	0.247258	5.81319	1.84453	0.317301	0	7.04002		0	0		0	0
507		23.9399	29.263	1.22235	14.385	13.8761	0.964621	5.30299	8.25309	1.55631	3.72204	3.86612	0.652254	3.99198	0.461011	0.25	0	0.903925		0	2.12731		0.88792	3.58748	4.04032	2.63712	3.25656	1.23489	0	0.653163		0	0.60783
508		16.3618	6.09622	0.372588	8.28449	3.01422	0.363839	3.12328	0.980647	0.31398	3.14969	2.05439	0.215674	2.05932	0.514831		2	0	0	1.41981	0.558034	0.393035	1.397	0	0	9.75516	1.2203	0.125093	1	0	0	1.11799	0	0
509		28.684	7.27928	0.253775	9.00736	2.95833	0.328435	5.08642	1.24471	0.244713	2.01728	0.435075		0	0.422987		0	0.46173		2.09376	0	0	0	0		0	0		0	0		0	0
510	SRS6	40.3387	1.19324	0.0295805	0	0.344134		0	0		0	0.365925	0.595498	0	0	0.412714	0	0		0	0.409046		0	0		0	0		0	0.401602		0	0
511		21.3396	7.74175	0.362787	11.1477	5.89959	0.529222	4.51976	4.28291	0.947597	2.54728	1.5169	0	2.11994	0.874929	0	0	1.27378		3.6053	1.82551	0.506342	0	0		0	1.3949		0	0		0	1.12502
512		35.2292	1.59587	0.0452995	17.4515	0	0	3.75749	0	0	6.22966	0	0.221366	5.55338	0	0.369876	0	0		2.09744	0	0	6.6402	0	0	2.51507	0	0	0	0		0	0
513		26.1337	15.4154	0.589868	19.6292	2.83123	0.144236	9.70498	0.862893	0.0889124	6.79854	1.50497	0	1.38478	0.512197	0.75	0	0		3.25604	1.11658	0.342926	2.79399	0	0	8.40427	3.5661	0.42432	0.780906	0	0	0	1.20226
514		27.0754	18.2208	0.672966	10.8079	2.7885	0.258007	3.60514	1.24897	0.346442	4.13861	0	0	2.05932	1.54449	0	0	1.42486		2.40353	0	0	5.58799	0	0	2.95604	1.1145	0.377024	0	0		0	1.22623
515		33.3164	8.79443	0.263967	9.13327	0	0	3	0	0	2.06931	0	1.29375	2.05932	0	0	1	0	0	2.88832	0	0	0	0		2.17736	0	0	0	0		1.3071	0	0
516		38.2652	17.5458	0.458532	11.6826	5.12164	0.4384	5.29815	1.82842	0.345105	2.19581	2.84083	0.2	2.0374	0	0	0	0		3.6053	0	0	2.61178	0	0	1.87411	0	0	0.988759	0.595675	0.602447	0	0
517		35.7204	8.75258	0.24503	19.2813	2.03754	0.105674	9	1.00801	0.112001	5.17327	1.03465	1.99655	4.11865	0		0	0		1.20177	0	0	0	0		3.26604	0	0	1	0	0	1.3071	0	0
518		13.0375	2.64053	0.202534	4.07949	5.57518	1.36664	3.02828	2.99383	0.988625	1.03585	2.06812	0	0	0	0	0.619431	0	0	0	0		1.18322	0	0	1.87779	2.37233	1.26337	0	0		1.38158	1.27279	0.92126
519		29.6829	8.33975	0.280961	12.1777	0	0	6	0	0	6.20792	0	0	1.02966	0	0	0	0		2.00514	0	0	0	0		6.53209	0.545776	0.0835531	0	0		0	1.36326
520		21.5713	3.37811	0.156602	18.919	2.07382	0.109616	9.02434	1.94557	0.215591	4.3557	0	0.0833333	2.47072	0		0	0		0.99406	0	0	4.67814	0	0	4.98453	0	0	0	0		1.1227	0	0
521		16.338	2.03862	0.124778	14.4489	6.05151	0.418822	7.09234	3.47736	0.490299	6.20792	0.517327	0.364519	0	2.02057	0.262118	1	0	0	1.86252	1.48606	0.797877	0	0		0	0		2	1	0.5	0.926689	1.59264	1.71863
522		17.1868	10.2552	0.596692	7.44395	5.80195	0.779417	2.42357	3.63462	1.4997	3.56893	1.30094	0.108738	1.65263	0.433185	0.786355	0	0		4.36942	0.534138	0.122245	0	1.78385		3.79109	2.88346	0.760589	1.89025	0.411585	0.217742	0	1.06568
523		30.4071	5.53267	0.181953	8.73528	2.94394	0.337018	3.38567	0.83361	0.246217	3.86758	0.420553	0	1.65263	1.29955	0	1	0	0	3	0.5	0.166667	0	0		4.14966	1.30778	0.315152	0	0		1.3071	0	0
524		22.1557	8.72828	0.393951	15.7913	0.556371	0.0352328	5.46204	0.752615	0.13779	6.44606	0	0.232625	3.02241	0	0.190767	0.777294	0	0	2.96823	0.505337	0.170248	0	0		5.38893	0	0	0	0		1.13095	0.7191	0.635838
525		19.4925	14.9466	0.766789	18.0561	8.16253	0.452065	4.16323	3.97614	0.955061	6.51704	1.51603	0	9.65048	1.84099	0	1	0	0	2.16564	1.66302	0.767911	0	0		3.85508	1.16412	0.30197	0	0		1.3071	0	0
526		13.3923	1.42344	0.106287	17.2861	1.40304	0.0811658	8.33013	1.38825	0.166654	5.71102	0	2.73342	3.28969	0		0	0		3.48116	0	0	0	0		0	0		0	0.5		0	1.24189
527		25.4027	16.1511	0.6358	6.39844	6.9437	1.08522	5.2526	3.41782	0.65069	1.36967	3.74389	0.2	0	0	0	0	0		0.543232	1.66051	3.05673	0	1.397		6.12919	1.54953	0.252812	0	0.757354		0.72542	0.946022	1.3041
528		25.4576	2.04093	0.08017	14.8934	1.03112	0.0692335	7.36025	0.765376	0.103988	5.17327	1.03465	0.198966	2.05932	0	0.979694	0	0		0	0		1.397	0	0	4.35472	0.54434	0.125	1	0	0	0	0
529		27.3622	14.9035	0.544677	13.3859	5.03765	0.37634	5.66719	2.71002	0.478195	5.19119	1.03287	0.443434	1.04389	1.02269		0	0		0	0		2.20297	2.5233	1.14541	8.94845	1.61468	0.180442	1.03541	0.496937	0.47994	0	1.20718
530		24.5892	14.7715	0.600734	12.5146	5.55605	0.443965	5	2.01524	0.403047	6.80758	3.01871	0.152722	0	1.0251	0.179023	0	0		3.6053	0	0	2.79399	0.698499	0.25	2.19234	1.63089	0.743907	1.01902	0.990755	0.972265	0	0.653549
531		21.0736	7.24193	0.343649	16.8002	1.75419	0.104414	3.93024	0	0	7.94884	1.21396	1.39148	2.80701	0.502519	0.666667	1.45407	0.459005	0.315668	1.42326	1.115	0.783414	3.01745	0	0	2.06864	0	0	0.975526	0	0	0	0
532		0	nan		18.3754	13.5581	0.737842	7.4814	6.00837	0.803108	3.63299	5.05524		4.33293	2.88862	1.14291	3.21421	0.91382	0.284306	0	nan		0	nan		0	nan		0	nan		0	nan
533		0	0		16.4632	14.1895	0.861889	10.3334	6.05235	0.585708	0	1.78759	0.429422	3.49972	3.99987	0.378987	0.51887	1.72384	3.32229	0	nan		0	nan		0	nan		0	nan		0	nan
534		31.7571	14.2002	0.44715	20.4751	11.6472	0.568845	5.31131	5.33336	1.00415	7.00489	3.00805	0.678	6.58745	2.49656	0.778367	0	0.778777		3.43157	0	0	3.57687	1.88879	0.528058	2.24868	1.07169	0.476584	0	0		1.11799	0	0
535		16.9277	19.8789	1.17434	16.5287	12.6875	0.767601	5.58696	5.7137	1.02268	6.60427	4.4777	1.16182	3.26128	2.53847	1.03153	1.587	0.535543	0.337457	0	1.47277		0	1.49133		9.79025	3.29363	0.33642	0	0		3.02264	0.509081	0.168423
536		26.303	15.9342	0.605795	18.1894	14.448	0.794309	9.74725	4.06948	0.4175	5.72153	6.6474	0.641739	2.73213	2.81828	2.22026	0	0		2.85415	1.08586	0.380451	5.58799	0	0	7.62077	0	0	0	0		1.3071	0	0
537		28.3349	10.4812	0.369904	14.2931	15.4246	1.07917	6.18648	8.82538	1.42656	4.96682	3.1874	0.663157	1.69005	3.75235	0.497338	0	1.44817		1.82885	0	0	1.3667	2.14721	1.57109	7.33346	1.35735	0.185091	0	0		2.11852	0.548507	0.258911
538		25.0782	9.97184	0.39763	20.0767	15.9713	0.795516	6.27998	8.68847	1.38352	8.52076	5.6506	0.713371	4.16768	2.07275	0.726834	2.58489	1.79672	0.695087	0	0.983648		0	0		4.35472	0.54434	0.125	1	0	0	1.3071	0	0
539		33.7295	23.5312	0.697645	15.1389	16.9235	1.11788	5.2969	7.25535	1.36974	6.62215	4.72405	1.47006	4.30961	3.13237	1.97254	1.47735	1.86695	1.26372	4.14505	1.47421	0.355655	2.7608	3.51362	1.27268	7.62478	4.40494	0.577713	1.19521	0	0	1.3071	0.653549	0.5
540		32.5705	27.7114	0.850813	9.65429	18.3342	1.89907	4.3637	9.64202	2.2096	3.10762	4.56839	0.600668	1.04785	2.06693	0.829556	0.954111	1.02876	1.07824	1.72981	1.63573	0.945615	4.17104	2.80069	0.671462	3.40636	4.29373	1.26051	1	0	0	0	1.30964
541		28.1201	30.2802	1.07682	19.517	16.3123	0.835796	8.38313	7.42488	0.885693	7.47607	4.49063	0.742687	4.139	3.43353	0	1.5937	0.898743	0.563933	0	0		3.58616	1.6887	0.470895	3.87298	2.44247	0.630644	0.924643	1.19814	1.29579	1.28072	1.3207	1.03122
542		30.4929	32.6253	1.06993	17.7963	16.129	0.90631	11.5333	9.01801	0.78191	6.18299	4.59202		4.25172	0		0	0.610435		0	0		5.36472	2.59456	0.483634	5.80678	2.90339	0.5	0	0		0	0
543		23.3264	34.2066	1.46643	7.73572	12.6739	1.63836	4.50928	6.94768	1.54075	0	2.31496		0	0		0	1.09425		0	0		5.71559	2.46475	0.431233	0	2.78835		0	nan		0	0
544		29.1977	28.211	0.966206	13.8128	10.4154	0.75404	4.45124	7.12678	1.60108	0	0		0	nan		1.18602	1.19606	1.00846	0	0		4.68117	3.79974	0.811707	0	0		0	nan		0	0
545		29.7834	11.9223	0.400301	0	11.1369		0	5.77637		0	nan		0	nan		3.59101	1.02126	0.284392	0	0		10.1116	4.66188	0.461043	0	0		0	nan		0	nan
546		19.4115	19.3074	0.994641	28.7446	7.07406	0.246101	13.4704	3.37826	0.250792	0	nan		0	nan		1.83406	0.507594	0.27676	0	nan		4.32866	3.23769	0.747965	0	0		0	nan		0	nan
Note: the sites in red indicate the dN/dS ≥1.0; the sites in yellow indicate the dN/dS≥2.0.
